# Supplementary material for: Single Cell Transcriptome Data Analysis Defines the Heterogeneity of Peripheral Nerve Cells in Homeostasis and Regeneration
Source: Front Cell Neurosci. 2021 Mar 22;15:624826. doi: 10.3389/fncel.2021.624826 (PMC8019921; doi:10.3389/fncel.2021.624826)
Supplement: Supplementary file 2 [file Table_1.XLSX]

## Sheet: summary
	Cell tpyes	Intact & 3 day injury		Intact & 9 day injury		3 day injury & 9 day injury		Total changes
		Upregulation	Downregulation	Upregulation	Downregulation	Upregulation	Downregulation
	Differentiating fibroblasts	300	15	120	34	75	480	1024
	Endothelial cells	176	93	121	269	28	187	874
	Endoneurial fibroblasts	1533	153	719	191	72	521	3189
	Schwann cells	2045	117	66	658	1529	172	4587
	Epineurial fibroblasts	100	69	21	53	11	76	330
	Macrophages	27	0	25	0	30	77	159
	B cells	1	1	17	215	12	192	438
	Perineurial cells	14	2	4	4	1	3	28
	VSM	109	19	0	0	0	0	128
	Pericytes	11	0	0	0	0	0	11

## Sheet: Differentiating fibroblasts 
	p_val	avg_log2FC	pct.1	pct.2	p_val_adj	comparison
Gm175411	6.2823e-83	1.944	0.535	0.044	1.13578e-78	0_injured_3day_vs_0_injured_9day	Differentiating fibroblasts
Rpsa-ps101	6.23128e-75	1.92545	0.766	0.356	1.12655e-70	0_injured_3day_vs_0_injured_9day	Differentiating fibroblasts
Rpl21-ps41	2.67155e-69	1.77775	0.569	0.112	4.82989e-65	0_injured_3day_vs_0_injured_9day	Differentiating fibroblasts
Gm39401	2.3867e-66	1.67231	0.532	0.093	4.31491e-62	0_injured_3day_vs_0_injured_9day	Differentiating fibroblasts
Gm102882	1.67955e-65	1.87937	0.673	0.265	3.03646e-61	0_injured_3day_vs_0_injured_9day	Differentiating fibroblasts
Gm100761	2.98979e-65	1.70415	0.784	0.496	5.40525e-61	0_injured_3day_vs_0_injured_9day	Differentiating fibroblasts
Mest2	4.38342e-65	-2.46946	0.355	0.751	7.92479e-61	0_injured_3day_vs_0_injured_9day	Differentiating fibroblasts
Gm52441	1.18562e-64	1.30476	0.416	0.022	2.14347e-60	0_injured_3day_vs_0_injured_9day	Differentiating fibroblasts
Mdk2	2.00979e-63	-2.44669	0.253	0.666	3.6335e-59	0_injured_3day_vs_0_injured_9day	Differentiating fibroblasts
Rpl9-ps62	1.16238e-61	1.67739	0.615	0.19	2.10146e-57	0_injured_3day_vs_0_injured_9day	Differentiating fibroblasts
Wdr891	1.05064e-56	1.36451	0.823	0.593	1.89945e-52	0_injured_3day_vs_0_injured_9day	Differentiating fibroblasts
Gm100732	1.19635e-56	1.644	0.63	0.249	2.16288e-52	0_injured_3day_vs_0_injured_9day	Differentiating fibroblasts
Gm224261	1.45209e-56	1.25544	0.478	0.08	2.62523e-52	0_injured_3day_vs_0_injured_9day	Differentiating fibroblasts
Gm227611	6.99388e-54	1.21608	0.442	0.064	1.26442e-49	0_injured_3day_vs_0_injured_9day	Differentiating fibroblasts
Mir6821	2.72487e-51	1.41231	0.537	0.14	4.9263e-47	0_injured_3day_vs_0_injured_9day	Differentiating fibroblasts
Rps10-ps11	6.40192e-50	1.54204	0.727	0.452	1.1574e-45	0_injured_3day_vs_0_injured_9day	Differentiating fibroblasts
Rpl13-ps31	1.39498e-49	1.51668	0.639	0.29	2.52198e-45	0_injured_3day_vs_0_injured_9day	Differentiating fibroblasts
Gm65761	2.19353e-49	1.47035	0.522	0.149	3.96568e-45	0_injured_3day_vs_0_injured_9day	Differentiating fibroblasts
Gm102602	5.81898e-49	1.47077	0.71	0.43	1.05201e-44	0_injured_3day_vs_0_injured_9day	Differentiating fibroblasts
Rpl13a-ps11	4.13968e-48	1.37136	0.511	0.137	7.48412e-44	0_injured_3day_vs_0_injured_9day	Differentiating fibroblasts
Gm84441	1.0627e-47	1.40938	0.504	0.141	1.92126e-43	0_injured_3day_vs_0_injured_9day	Differentiating fibroblasts
Gm102692	1.93817e-47	1.30297	0.619	0.251	3.50401e-43	0_injured_3day_vs_0_injured_9day	Differentiating fibroblasts
Cenpq1	3.26323e-45	1.18997	0.398	0.066	5.8996e-41	0_injured_3day_vs_0_injured_9day	Differentiating fibroblasts
Rpl341	1.30561e-44	1.54708	0.658	0.366	2.36042e-40	0_injured_3day_vs_0_injured_9day	Differentiating fibroblasts
Rpsa2	6.05327e-44	1.17332	0.779	0.534	1.09437e-39	0_injured_3day_vs_0_injured_9day	Differentiating fibroblasts
Itm2a1	8.01118e-44	-1.63559	0.519	0.758	1.44834e-39	0_injured_3day_vs_0_injured_9day	Differentiating fibroblasts
Lrrc582	8.89099e-43	1.46462	0.69	0.397	1.6074e-38	0_injured_3day_vs_0_injured_9day	Differentiating fibroblasts
Mir692-11	3.3615e-42	1.06674	0.472	0.127	6.07725e-38	0_injured_3day_vs_0_injured_9day	Differentiating fibroblasts
Gm102752	9.02802e-42	1.35441	0.669	0.37	1.63218e-37	0_injured_3day_vs_0_injured_9day	Differentiating fibroblasts
Gm150131	2.23658e-41	0.997465	0.335	0.042	4.04351e-37	0_injured_3day_vs_0_injured_9day	Differentiating fibroblasts
Gm174301	1.13828e-40	0.99215	0.411	0.086	2.0579e-36	0_injured_3day_vs_0_injured_9day	Differentiating fibroblasts
Ctsl1	1.9499e-40	1.14388	0.855	0.593	3.52522e-36	0_injured_3day_vs_0_injured_9day	Differentiating fibroblasts
Gm175111	2.30551e-40	1.05226	0.385	0.073	4.16813e-36	0_injured_3day_vs_0_injured_9day	Differentiating fibroblasts
Rps3a21	1.95915e-39	0.986841	0.379	0.069	3.54195e-35	0_injured_3day_vs_0_injured_9day	Differentiating fibroblasts
Rps26-ps12	2.60292e-37	1.32186	0.732	0.528	4.70582e-33	0_injured_3day_vs_0_injured_9day	Differentiating fibroblasts
Serpine21	3.72776e-37	-2.47849	0.242	0.554	6.73942e-33	0_injured_3day_vs_0_injured_9day	Differentiating fibroblasts
Anxa32	4.68278e-37	1.22944	0.379	0.079	8.466e-33	0_injured_3day_vs_0_injured_9day	Differentiating fibroblasts
Gm227591	1.58447e-36	0.836263	0.32	0.045	2.86457e-32	0_injured_3day_vs_0_injured_9day	Differentiating fibroblasts
Gm248651	4.58629e-36	0.716243	0.236	0.009	8.29155e-32	0_injured_3day_vs_0_injured_9day	Differentiating fibroblasts
mt-Rnr21	1.69851e-35	-0.91558	0.965	0.988	3.07074e-31	0_injured_3day_vs_0_injured_9day	Differentiating fibroblasts
Gm240981	3.42459e-35	0.77952	0.268	0.025	6.19132e-31	0_injured_3day_vs_0_injured_9day	Differentiating fibroblasts
Rpl18a2	3.68913e-35	1.23675	0.66	0.378	6.66958e-31	0_injured_3day_vs_0_injured_9day	Differentiating fibroblasts
Pabpc12	6.41649e-35	0.752615	0.926	0.808	1.16004e-30	0_injured_3day_vs_0_injured_9day	Differentiating fibroblasts
Postn2	2.28436e-34	-0.926159	0.861	0.923	4.12989e-30	0_injured_3day_vs_0_injured_9day	Differentiating fibroblasts
Gm49681	8.9794e-34	0.851533	0.316	0.051	1.62339e-29	0_injured_3day_vs_0_injured_9day	Differentiating fibroblasts
Rps3a32	6.66037e-33	0.930203	0.712	0.405	1.20413e-28	0_injured_3day_vs_0_injured_9day	Differentiating fibroblasts
Gm249511	1.4214e-32	0.795701	0.271	0.032	2.56975e-28	0_injured_3day_vs_0_injured_9day	Differentiating fibroblasts
Tmsb101	5.13048e-32	0.99918	0.794	0.641	9.27539e-28	0_injured_3day_vs_0_injured_9day	Differentiating fibroblasts
Gm255951	8.31712e-32	0.730836	0.203	0.006	1.50365e-27	0_injured_3day_vs_0_injured_9day	Differentiating fibroblasts
Fbln22	9.45205e-32	1.17955	0.74	0.437	1.70884e-27	0_injured_3day_vs_0_injured_9day	Differentiating fibroblasts
Gm102632	9.96012e-32	1.264	0.667	0.418	1.80069e-27	0_injured_3day_vs_0_injured_9day	Differentiating fibroblasts
Gm61331	1.13779e-31	0.689542	0.29	0.045	2.05701e-27	0_injured_3day_vs_0_injured_9day	Differentiating fibroblasts
Gm103201	1.97408e-31	1.14333	0.593	0.309	3.56894e-27	0_injured_3day_vs_0_injured_9day	Differentiating fibroblasts
Crip12	2.52623e-31	1.06691	0.838	0.697	4.56717e-27	0_injured_3day_vs_0_injured_9day	Differentiating fibroblasts
S100a62	1.22323e-30	0.788767	0.95	0.85	2.21148e-26	0_injured_3day_vs_0_injured_9day	Differentiating fibroblasts
Rpl10-ps31	1.8405e-30	0.880288	0.355	0.085	3.32743e-26	0_injured_3day_vs_0_injured_9day	Differentiating fibroblasts
Smoc22	3.28257e-30	-1.75063	0.242	0.547	5.93456e-26	0_injured_3day_vs_0_injured_9day	Differentiating fibroblasts
Gm20001	7.74504e-30	1.05018	0.535	0.238	1.40023e-25	0_injured_3day_vs_0_injured_9day	Differentiating fibroblasts
Rps82	7.7887e-30	0.793238	0.816	0.65	1.40812e-25	0_injured_3day_vs_0_injured_9day	Differentiating fibroblasts
Nrep1	9.317e-30	-1.62039	0.318	0.573	1.68442e-25	0_injured_3day_vs_0_injured_9day	Differentiating fibroblasts
Gm42041	2.09404e-29	1.16577	0.535	0.245	3.78582e-25	0_injured_3day_vs_0_injured_9day	Differentiating fibroblasts
Rpl36-ps32	3.77959e-29	1.00331	0.439	0.165	6.83312e-25	0_injured_3day_vs_0_injured_9day	Differentiating fibroblasts
Rpl131	8.30332e-29	0.92114	0.749	0.595	1.50116e-24	0_injured_3day_vs_0_injured_9day	Differentiating fibroblasts
Gm225821	4.46945e-28	0.57161	0.195	0.01	8.08032e-24	0_injured_3day_vs_0_injured_9day	Differentiating fibroblasts
Prrx12	4.9627e-28	0.956376	0.742	0.496	8.97206e-24	0_injured_3day_vs_0_injured_9day	Differentiating fibroblasts
Rpl222	2.02369e-27	0.798922	0.803	0.646	3.65863e-23	0_injured_3day_vs_0_injured_9day	Differentiating fibroblasts
Rpl35a1	2.49843e-27	1.1081	0.574	0.306	4.51692e-23	0_injured_3day_vs_0_injured_9day	Differentiating fibroblasts
Rps182	2.8348e-27	0.957224	0.383	0.124	5.12503e-23	0_injured_3day_vs_0_injured_9day	Differentiating fibroblasts
Cldn11	2.83963e-27	-1.5037	0.058	0.321	5.13376e-23	0_injured_3day_vs_0_injured_9day	Differentiating fibroblasts
Gm98431	5.63874e-27	0.915855	0.742	0.541	1.01943e-22	0_injured_3day_vs_0_injured_9day	Differentiating fibroblasts
Igfbp42	1.53745e-26	-0.821838	0.82	0.876	2.77956e-22	0_injured_3day_vs_0_injured_9day	Differentiating fibroblasts
Rpl412	1.88763e-26	0.664904	0.866	0.781	3.41265e-22	0_injured_3day_vs_0_injured_9day	Differentiating fibroblasts
Rpl37a1	2.43886e-26	0.768373	0.801	0.647	4.40922e-22	0_injured_3day_vs_0_injured_9day	Differentiating fibroblasts
Gm52771	3.18236e-26	0.39398	0.199	0.016	5.75338e-22	0_injured_3day_vs_0_injured_9day	Differentiating fibroblasts
Hbb-bs2	8.3612e-26	-1.55254	0.474	0.187	1.51162e-21	0_injured_3day_vs_0_injured_9day	Differentiating fibroblasts
mt-Tc1	8.77858e-26	1.14794	0.216	0.026	1.58708e-21	0_injured_3day_vs_0_injured_9day	Differentiating fibroblasts
Ly6a2	1.22657e-25	0.990619	0.76	0.464	2.21751e-21	0_injured_3day_vs_0_injured_9day	Differentiating fibroblasts
Mt22	3.22627e-25	0.940891	0.426	0.153	5.83277e-21	0_injured_3day_vs_0_injured_9day	Differentiating fibroblasts
Efemp12	3.32226e-25	1.08225	0.528	0.236	6.00632e-21	0_injured_3day_vs_0_injured_9day	Differentiating fibroblasts
Col18a11	1.10091e-24	-1.51747	0.227	0.481	1.99033e-20	0_injured_3day_vs_0_injured_9day	Differentiating fibroblasts
Rps4x2	1.23488e-24	0.931549	0.738	0.563	2.23254e-20	0_injured_3day_vs_0_injured_9day	Differentiating fibroblasts
C32	1.37564e-24	0.912633	0.506	0.206	2.48702e-20	0_injured_3day_vs_0_injured_9day	Differentiating fibroblasts
Ptrf2	1.43369e-24	0.882525	0.775	0.535	2.59197e-20	0_injured_3day_vs_0_injured_9day	Differentiating fibroblasts
Rpl302	1.47955e-24	0.927047	0.552	0.286	2.67488e-20	0_injured_3day_vs_0_injured_9day	Differentiating fibroblasts
Igfbp72	2.12023e-24	-0.730153	0.898	0.895	3.83317e-20	0_injured_3day_vs_0_injured_9day	Differentiating fibroblasts
Emilin21	3.39254e-24	0.851613	0.446	0.171	6.13337e-20	0_injured_3day_vs_0_injured_9day	Differentiating fibroblasts
Lgals31	5.32615e-24	0.811369	0.448	0.176	9.62914e-20	0_injured_3day_vs_0_injured_9day	Differentiating fibroblasts
Rpl231	5.58365e-24	0.758457	0.777	0.601	1.00947e-19	0_injured_3day_vs_0_injured_9day	Differentiating fibroblasts
Gm119831	7.01946e-24	0.436962	0.177	0.013	1.26905e-19	0_injured_3day_vs_0_injured_9day	Differentiating fibroblasts
Ltbp42	7.29299e-24	-1.06137	0.303	0.566	1.3185e-19	0_injured_3day_vs_0_injured_9day	Differentiating fibroblasts
Gm170871	1.17978e-23	0.633668	0.227	0.036	2.13293e-19	0_injured_3day_vs_0_injured_9day	Differentiating fibroblasts
Tmem2452	1.40817e-23	1.01667	0.316	0.09	2.54584e-19	0_injured_3day_vs_0_injured_9day	Differentiating fibroblasts
Rplp22	1.86619e-23	0.63872	0.842	0.714	3.37389e-19	0_injured_3day_vs_0_injured_9day	Differentiating fibroblasts
Sod32	2.28988e-23	0.788954	0.571	0.268	4.13988e-19	0_injured_3day_vs_0_injured_9day	Differentiating fibroblasts
Gm51601	6.02523e-23	0.792129	0.359	0.125	1.0893e-18	0_injured_3day_vs_0_injured_9day	Differentiating fibroblasts
S100a42	1.31529e-22	1.03493	0.558	0.283	2.37791e-18	0_injured_3day_vs_0_injured_9day	Differentiating fibroblasts
Rps252	1.60474e-22	0.870895	0.619	0.402	2.90121e-18	0_injured_3day_vs_0_injured_9day	Differentiating fibroblasts
Rpl21-ps61	1.77402e-22	0.546579	0.18	0.017	3.20725e-18	0_injured_3day_vs_0_injured_9day	Differentiating fibroblasts
Gm230611	2.84447e-22	0.468645	0.182	0.019	5.14251e-18	0_injured_3day_vs_0_injured_9day	Differentiating fibroblasts
Rps202	3.04561e-22	0.562553	0.896	0.784	5.50616e-18	0_injured_3day_vs_0_injured_9day	Differentiating fibroblasts
Rpl9-ps1	3.23538e-22	0.545317	0.219	0.036	5.84924e-18	0_injured_3day_vs_0_injured_9day	Differentiating fibroblasts
Orc51	8.47912e-22	0.949657	0.465	0.235	1.53294e-17	0_injured_3day_vs_0_injured_9day	Differentiating fibroblasts
Mfap22	9.55505e-22	-1.07116	0.506	0.66	1.72746e-17	0_injured_3day_vs_0_injured_9day	Differentiating fibroblasts
Scara52	2.01242e-21	0.828033	0.303	0.083	3.63825e-17	0_injured_3day_vs_0_injured_9day	Differentiating fibroblasts
Tnxb2	2.58617e-21	0.91862	0.439	0.178	4.67554e-17	0_injured_3day_vs_0_injured_9day	Differentiating fibroblasts
Fabp42	6.55723e-21	0.356427	0.424	0.175	1.18548e-16	0_injured_3day_vs_0_injured_9day	Differentiating fibroblasts
Htra31	1.07839e-20	1.1173	0.472	0.222	1.94963e-16	0_injured_3day_vs_0_injured_9day	Differentiating fibroblasts
Gm101261	2.03246e-20	0.554145	0.212	0.039	3.67449e-16	0_injured_3day_vs_0_injured_9day	Differentiating fibroblasts
Gm94931	2.54744e-20	0.730676	0.325	0.109	4.60551e-16	0_injured_3day_vs_0_injured_9day	Differentiating fibroblasts
Ly6c11	2.56499e-20	0.87555	0.53	0.261	4.63724e-16	0_injured_3day_vs_0_injured_9day	Differentiating fibroblasts
Gm60961	3.28839e-20	0.430387	0.147	0.01	5.94508e-16	0_injured_3day_vs_0_injured_9day	Differentiating fibroblasts
Gm26226	4.5436e-20	0.52882	0.134	0.006	8.21437e-16	0_injured_3day_vs_0_injured_9day	Differentiating fibroblasts
Rps3a12	4.81044e-20	0.66364	0.816	0.631	8.69679e-16	0_injured_3day_vs_0_injured_9day	Differentiating fibroblasts
Rps162	5.21534e-20	0.735964	0.53	0.296	9.42881e-16	0_injured_3day_vs_0_injured_9day	Differentiating fibroblasts
Ccl22	5.36335e-20	0.96017	0.405	0.166	9.6964e-16	0_injured_3day_vs_0_injured_9day	Differentiating fibroblasts
Igf12	6.29894e-20	-0.928596	0.742	0.827	1.13879e-15	0_injured_3day_vs_0_injured_9day	Differentiating fibroblasts
Wbscr172	6.84002e-20	-1.08058	0.102	0.331	1.23661e-15	0_injured_3day_vs_0_injured_9day	Differentiating fibroblasts
Prg4	7.33332e-20	0.892899	0.175	0.023	1.32579e-15	0_injured_3day_vs_0_injured_9day	Differentiating fibroblasts
Gm118081	9.34023e-20	0.451266	0.214	0.041	1.68862e-15	0_injured_3day_vs_0_injured_9day	Differentiating fibroblasts
Ly6c21	9.8235e-20	0.719173	0.197	0.034	1.77599e-15	0_injured_3day_vs_0_injured_9day	Differentiating fibroblasts
Mt12	1.13763e-19	0.673953	0.485	0.224	2.05672e-15	0_injured_3day_vs_0_injured_9day	Differentiating fibroblasts
Lox1	2.16339e-19	0.887168	0.781	0.614	3.91119e-15	0_injured_3day_vs_0_injured_9day	Differentiating fibroblasts
Anxa22	2.24661e-19	0.737212	0.857	0.698	4.06165e-15	0_injured_3day_vs_0_injured_9day	Differentiating fibroblasts
Cdh112	2.83848e-19	-1.15306	0.374	0.583	5.13168e-15	0_injured_3day_vs_0_injured_9day	Differentiating fibroblasts
Gm165191	3.31636e-19	0.321893	0.149	0.013	5.99565e-15	0_injured_3day_vs_0_injured_9day	Differentiating fibroblasts
Gsn2	5.58467e-19	1.03767	0.771	0.547	1.00965e-14	0_injured_3day_vs_0_injured_9day	Differentiating fibroblasts
Rps15a2	6.07207e-19	0.593965	0.812	0.71	1.09777e-14	0_injured_3day_vs_0_injured_9day	Differentiating fibroblasts
Sez61	6.93338e-19	0.496139	0.119	0.003	1.25349e-14	0_injured_3day_vs_0_injured_9day	Differentiating fibroblasts
Gm26335	7.41502e-19	0.58501	0.16	0.019	1.34056e-14	0_injured_3day_vs_0_injured_9day	Differentiating fibroblasts
Gm49781	8.20769e-19	0.472924	0.143	0.012	1.48387e-14	0_injured_3day_vs_0_injured_9day	Differentiating fibroblasts
Rpl392	8.21221e-19	0.648457	0.823	0.688	1.48468e-14	0_injured_3day_vs_0_injured_9day	Differentiating fibroblasts
Gm87302	1.10326e-18	0.860603	0.517	0.3	1.99458e-14	0_injured_3day_vs_0_injured_9day	Differentiating fibroblasts
S100a101	1.18417e-18	0.774993	0.775	0.574	2.14086e-14	0_injured_3day_vs_0_injured_9day	Differentiating fibroblasts
Gm227571	1.73692e-18	0.373348	0.126	0.006	3.14017e-14	0_injured_3day_vs_0_injured_9day	Differentiating fibroblasts
Adamts161	2.56812e-18	-0.787484	0.015	0.184	4.64291e-14	0_injured_3day_vs_0_injured_9day	Differentiating fibroblasts
Rps281	3.07818e-18	0.712904	0.693	0.525	5.56503e-14	0_injured_3day_vs_0_injured_9day	Differentiating fibroblasts
Actb2	3.13164e-18	0.502326	0.937	0.891	5.6617e-14	0_injured_3day_vs_0_injured_9day	Differentiating fibroblasts
Gm56111	3.7849e-18	0.444811	0.203	0.042	6.84272e-14	0_injured_3day_vs_0_injured_9day	Differentiating fibroblasts
Axl1	1.05289e-17	0.701532	0.5	0.264	1.90351e-13	0_injured_3day_vs_0_injured_9day	Differentiating fibroblasts
Thbs42	1.12745e-17	-1.3671	0.229	0.443	2.03832e-13	0_injured_3day_vs_0_injured_9day	Differentiating fibroblasts
Rpl352	1.1699e-17	0.815816	0.519	0.303	2.11506e-13	0_injured_3day_vs_0_injured_9day	Differentiating fibroblasts
Eef1b22	1.27322e-17	0.471072	0.851	0.707	2.30186e-13	0_injured_3day_vs_0_injured_9day	Differentiating fibroblasts
Dlk12	1.40548e-17	-1.70646	0.171	0.395	2.54096e-13	0_injured_3day_vs_0_injured_9day	Differentiating fibroblasts
Gm100362	1.80637e-17	0.66528	0.303	0.105	3.26574e-13	0_injured_3day_vs_0_injured_9day	Differentiating fibroblasts
Figf1	3.07421e-17	0.58608	0.227	0.057	5.55786e-13	0_injured_3day_vs_0_injured_9day	Differentiating fibroblasts
Gm100641	3.55919e-17	0.484378	0.143	0.016	6.43466e-13	0_injured_3day_vs_0_injured_9day	Differentiating fibroblasts
Maf2	3.61616e-17	0.753359	0.314	0.117	6.53766e-13	0_injured_3day_vs_0_injured_9day	Differentiating fibroblasts
Gm78081	3.70298e-17	0.685593	0.405	0.197	6.69462e-13	0_injured_3day_vs_0_injured_9day	Differentiating fibroblasts
Gm93961	8.4328e-17	0.482876	0.119	0.007	1.52457e-12	0_injured_3day_vs_0_injured_9day	Differentiating fibroblasts
Gm24121	9.6777e-17	0.369912	0.11	0.004	1.74963e-12	0_injured_3day_vs_0_injured_9day	Differentiating fibroblasts
Rpl27a2	1.10189e-16	0.682501	0.589	0.38	1.9921e-12	0_injured_3day_vs_0_injured_9day	Differentiating fibroblasts
Myadm1	1.36731e-16	0.798032	0.584	0.348	2.47197e-12	0_injured_3day_vs_0_injured_9day	Differentiating fibroblasts
Trf	1.58993e-16	0.348597	0.262	0.077	2.87444e-12	0_injured_3day_vs_0_injured_9day	Differentiating fibroblasts
Ehd11	2.00183e-16	0.598228	0.383	0.169	3.61911e-12	0_injured_3day_vs_0_injured_9day	Differentiating fibroblasts
Igfbp51	2.10866e-16	0.915331	0.775	0.558	3.81225e-12	0_injured_3day_vs_0_injured_9day	Differentiating fibroblasts
RP23-103I12.132	2.26231e-16	0.843408	0.636	0.436	4.09002e-12	0_injured_3day_vs_0_injured_9day	Differentiating fibroblasts
Rps262	2.46774e-16	0.505538	0.857	0.759	4.46142e-12	0_injured_3day_vs_0_injured_9day	Differentiating fibroblasts
Gm112731	3.24765e-16	0.503873	0.249	0.076	5.87143e-12	0_injured_3day_vs_0_injured_9day	Differentiating fibroblasts
Ctsh2	3.56695e-16	0.665198	0.318	0.121	6.4487e-12	0_injured_3day_vs_0_injured_9day	Differentiating fibroblasts
Ccnd11	4.14808e-16	0.476977	0.242	0.07	7.49931e-12	0_injured_3day_vs_0_injured_9day	Differentiating fibroblasts
B230369F24Rik1	4.72979e-16	0.316735	0.126	0.012	8.55099e-12	0_injured_3day_vs_0_injured_9day	Differentiating fibroblasts
Errfi12	5.42062e-16	0.640877	0.353	0.143	9.79994e-12	0_injured_3day_vs_0_injured_9day	Differentiating fibroblasts
Gm227601	5.62873e-16	0.352812	0.126	0.012	1.01762e-11	0_injured_3day_vs_0_injured_9day	Differentiating fibroblasts
Procr2	8.18683e-16	0.626663	0.212	0.057	1.4801e-11	0_injured_3day_vs_0_injured_9day	Differentiating fibroblasts
Cd442	8.50052e-16	0.778878	0.509	0.277	1.53681e-11	0_injured_3day_vs_0_injured_9day	Differentiating fibroblasts
Gm9846	9.83882e-16	0.626622	0.255	0.083	1.77876e-11	0_injured_3day_vs_0_injured_9day	Differentiating fibroblasts
Gm107841	1.08547e-15	0.40264	0.141	0.019	1.96243e-11	0_injured_3day_vs_0_injured_9day	Differentiating fibroblasts
Ifi27l2a1	1.10988e-15	0.807153	0.284	0.102	2.00654e-11	0_injured_3day_vs_0_injured_9day	Differentiating fibroblasts
Lgals12	1.11306e-15	0.537465	0.937	0.837	2.01231e-11	0_injured_3day_vs_0_injured_9day	Differentiating fibroblasts
Ahnak1	1.3187e-15	0.582363	0.797	0.647	2.38407e-11	0_injured_3day_vs_0_injured_9day	Differentiating fibroblasts
Rpl182	1.41851e-15	0.648431	0.686	0.523	2.56453e-11	0_injured_3day_vs_0_injured_9day	Differentiating fibroblasts
Dpp42	1.49795e-15	0.771929	0.175	0.036	2.70815e-11	0_injured_3day_vs_0_injured_9day	Differentiating fibroblasts
Vim2	2.62084e-15	0.520803	0.913	0.822	4.73822e-11	0_injured_3day_vs_0_injured_9day	Differentiating fibroblasts
S100a112	2.70475e-15	0.601927	0.814	0.66	4.88992e-11	0_injured_3day_vs_0_injured_9day	Differentiating fibroblasts
Ptn2	3.25777e-15	-1.29607	0.355	0.534	5.88972e-11	0_injured_3day_vs_0_injured_9day	Differentiating fibroblasts
Igfbp32	3.45693e-15	1.04691	0.515	0.3	6.24978e-11	0_injured_3day_vs_0_injured_9day	Differentiating fibroblasts
Rps27a1	4.41232e-15	0.485746	0.264	0.09	7.97703e-11	0_injured_3day_vs_0_injured_9day	Differentiating fibroblasts
Rps242	5.04428e-15	0.450313	0.868	0.773	9.11955e-11	0_injured_3day_vs_0_injured_9day	Differentiating fibroblasts
Sgk11	6.77664e-15	0.790593	0.34	0.149	1.22515e-10	0_injured_3day_vs_0_injured_9day	Differentiating fibroblasts
Ccl81	7.00728e-15	0.536775	0.223	0.066	1.26685e-10	0_injured_3day_vs_0_injured_9day	Differentiating fibroblasts
Gm81861	7.35138e-15	0.510399	0.366	0.163	1.32906e-10	0_injured_3day_vs_0_injured_9day	Differentiating fibroblasts
Rpl7a-ps8	7.9326e-15	0.264107	0.115	0.01	1.43413e-10	0_injured_3day_vs_0_injured_9day	Differentiating fibroblasts
Vwa12	9.5373e-15	0.848089	0.297	0.112	1.72425e-10	0_injured_3day_vs_0_injured_9day	Differentiating fibroblasts
Rpl111	9.55519e-15	0.54785	0.554	0.367	1.72748e-10	0_injured_3day_vs_0_injured_9day	Differentiating fibroblasts
Sbsn1	1.11498e-14	0.630655	0.206	0.058	2.01578e-10	0_injured_3day_vs_0_injured_9day	Differentiating fibroblasts
Gm24311	1.54466e-14	0.501958	0.126	0.016	2.79259e-10	0_injured_3day_vs_0_injured_9day	Differentiating fibroblasts
Gm82251	1.68889e-14	0.414448	0.195	0.051	3.05335e-10	0_injured_3day_vs_0_injured_9day	Differentiating fibroblasts
Rpl36al1	1.88718e-14	0.61797	0.591	0.385	3.41184e-10	0_injured_3day_vs_0_injured_9day	Differentiating fibroblasts
Loxl22	1.90634e-14	0.6693	0.734	0.539	3.44647e-10	0_injured_3day_vs_0_injured_9day	Differentiating fibroblasts
Ctgf2	2.01999e-14	0.938587	0.398	0.203	3.65194e-10	0_injured_3day_vs_0_injured_9day	Differentiating fibroblasts
Gm7676	2.14962e-14	0.466953	0.247	0.082	3.8863e-10	0_injured_3day_vs_0_injured_9day	Differentiating fibroblasts
Fbn11	2.48636e-14	0.736595	0.881	0.776	4.4951e-10	0_injured_3day_vs_0_injured_9day	Differentiating fibroblasts
Rpl371	2.52684e-14	0.624301	0.716	0.615	4.56828e-10	0_injured_3day_vs_0_injured_9day	Differentiating fibroblasts
B020018G12Rik1	2.9372e-14	0.611769	0.21	0.06	5.31017e-10	0_injured_3day_vs_0_injured_9day	Differentiating fibroblasts
Gm49451	3.12289e-14	0.257987	0.121	0.015	5.64588e-10	0_injured_3day_vs_0_injured_9day	Differentiating fibroblasts
Ablim12	4.97169e-14	0.563211	0.316	0.131	8.98832e-10	0_injured_3day_vs_0_injured_9day	Differentiating fibroblasts
Igf21	5.5237e-14	-1.21318	0.091	0.27	9.9863e-10	0_injured_3day_vs_0_injured_9day	Differentiating fibroblasts
Mmp91	5.75485e-14	0.50807	0.108	0.01	1.04042e-09	0_injured_3day_vs_0_injured_9day	Differentiating fibroblasts
Nfib2	6.40087e-14	0.711419	0.684	0.481	1.15721e-09	0_injured_3day_vs_0_injured_9day	Differentiating fibroblasts
Crabp21	7.99844e-14	-0.735506	0.063	0.223	1.44604e-09	0_injured_3day_vs_0_injured_9day	Differentiating fibroblasts
Ehd21	8.37685e-14	0.398409	0.383	0.184	1.51445e-09	0_injured_3day_vs_0_injured_9day	Differentiating fibroblasts
Hba-a11	1.03819e-13	-1.26605	0.162	0.035	1.87695e-09	0_injured_3day_vs_0_injured_9day	Differentiating fibroblasts
Gm64722	1.48332e-13	0.700796	0.58	0.42	2.6817e-09	0_injured_3day_vs_0_injured_9day	Differentiating fibroblasts
Angpt11	1.74351e-13	-0.800601	0.095	0.268	3.15209e-09	0_injured_3day_vs_0_injured_9day	Differentiating fibroblasts
Zfp36l11	1.75038e-13	0.633027	0.643	0.452	3.16452e-09	0_injured_3day_vs_0_injured_9day	Differentiating fibroblasts
Gm237311	2.31347e-13	0.352366	0.102	0.009	4.18252e-09	0_injured_3day_vs_0_injured_9day	Differentiating fibroblasts
Tnfrsf11b1	2.55913e-13	0.516104	0.136	0.025	4.62666e-09	0_injured_3day_vs_0_injured_9day	Differentiating fibroblasts
Rbpj1	2.95983e-13	0.525028	0.206	0.063	5.35107e-09	0_injured_3day_vs_0_injured_9day	Differentiating fibroblasts
Gpc32	3.35898e-13	-0.846431	0.619	0.694	6.0727e-09	0_injured_3day_vs_0_injured_9day	Differentiating fibroblasts
Uap11	4.07937e-13	0.73148	0.364	0.179	7.3751e-09	0_injured_3day_vs_0_injured_9day	Differentiating fibroblasts
Gm2178	5.33496e-13	0.381873	0.123	0.019	9.64508e-09	0_injured_3day_vs_0_injured_9day	Differentiating fibroblasts
Itgam1	5.95374e-13	0.316532	0.13	0.022	1.07638e-08	0_injured_3day_vs_0_injured_9day	Differentiating fibroblasts
Pdgfra2	6.36557e-13	0.523411	0.515	0.308	1.15083e-08	0_injured_3day_vs_0_injured_9day	Differentiating fibroblasts
Rps22	6.49868e-13	0.533534	0.286	0.118	1.1749e-08	0_injured_3day_vs_0_injured_9day	Differentiating fibroblasts
Rpl142	7.45655e-13	0.461466	0.846	0.697	1.34807e-08	0_injured_3day_vs_0_injured_9day	Differentiating fibroblasts
Tspo1	8.73301e-13	0.543254	0.535	0.332	1.57884e-08	0_injured_3day_vs_0_injured_9day	Differentiating fibroblasts
Serf21	1.28587e-12	0.502287	0.66	0.491	2.32472e-08	0_injured_3day_vs_0_injured_9day	Differentiating fibroblasts
Pamr12	1.5324e-12	0.453402	0.301	0.125	2.77043e-08	0_injured_3day_vs_0_injured_9day	Differentiating fibroblasts
Plau	1.81803e-12	0.471542	0.212	0.07	3.28681e-08	0_injured_3day_vs_0_injured_9day	Differentiating fibroblasts
Eif3j21	1.88586e-12	0.481534	0.24	0.089	3.40945e-08	0_injured_3day_vs_0_injured_9day	Differentiating fibroblasts
Fn12	2.09193e-12	0.481631	0.944	0.88	3.78199e-08	0_injured_3day_vs_0_injured_9day	Differentiating fibroblasts
2010107E04Rik1	2.12094e-12	0.496973	0.632	0.461	3.83445e-08	0_injured_3day_vs_0_injured_9day	Differentiating fibroblasts
Zkscan11	2.14753e-12	0.486361	0.305	0.138	3.88251e-08	0_injured_3day_vs_0_injured_9day	Differentiating fibroblasts
Cthrc12	2.15936e-12	0.641053	0.79	0.618	3.90391e-08	0_injured_3day_vs_0_injured_9day	Differentiating fibroblasts
Tpm3-rs72	2.21613e-12	0.594859	0.472	0.283	4.00655e-08	0_injured_3day_vs_0_injured_9day	Differentiating fibroblasts
Capg1	2.62729e-12	0.530872	0.42	0.227	4.74989e-08	0_injured_3day_vs_0_injured_9day	Differentiating fibroblasts
Spon11	2.92604e-12	-0.747984	0.067	0.22	5.29e-08	0_injured_3day_vs_0_injured_9day	Differentiating fibroblasts
Bcat11	3.20634e-12	0.385232	0.238	0.086	5.79675e-08	0_injured_3day_vs_0_injured_9day	Differentiating fibroblasts
Fbln12	3.28131e-12	-0.933137	0.383	0.538	5.93228e-08	0_injured_3day_vs_0_injured_9day	Differentiating fibroblasts
Calml4	3.42441e-12	0.430646	0.206	0.07	6.191e-08	0_injured_3day_vs_0_injured_9day	Differentiating fibroblasts
Csf11	4.58473e-12	0.660826	0.359	0.185	8.28874e-08	0_injured_3day_vs_0_injured_9day	Differentiating fibroblasts
Gm57861	4.93383e-12	0.370432	0.152	0.036	8.91986e-08	0_injured_3day_vs_0_injured_9day	Differentiating fibroblasts
Gm6625	5.05522e-12	0.297252	0.132	0.026	9.13934e-08	0_injured_3day_vs_0_injured_9day	Differentiating fibroblasts
Lamb12	6.2133e-12	-0.885379	0.496	0.601	1.1233e-07	0_injured_3day_vs_0_injured_9day	Differentiating fibroblasts
Psme2b2	6.3995e-12	0.518574	0.32	0.155	1.15696e-07	0_injured_3day_vs_0_injured_9day	Differentiating fibroblasts
Ebf12	6.49748e-12	0.584647	0.524	0.338	1.17468e-07	0_injured_3day_vs_0_injured_9day	Differentiating fibroblasts
Gm49531	8.67953e-12	0.288361	0.13	0.026	1.56917e-07	0_injured_3day_vs_0_injured_9day	Differentiating fibroblasts
Hspa52	8.69217e-12	-0.491859	0.829	0.848	1.57146e-07	0_injured_3day_vs_0_injured_9day	Differentiating fibroblasts
Gm25538	9.16593e-12	0.370341	0.11	0.017	1.65711e-07	0_injured_3day_vs_0_injured_9day	Differentiating fibroblasts
Prelp2	9.52406e-12	0.667621	0.359	0.181	1.72186e-07	0_injured_3day_vs_0_injured_9day	Differentiating fibroblasts
Celf22	9.73873e-12	0.669067	0.463	0.277	1.76066e-07	0_injured_3day_vs_0_injured_9day	Differentiating fibroblasts
Gm52391	9.94484e-12	0.302577	0.13	0.026	1.79793e-07	0_injured_3day_vs_0_injured_9day	Differentiating fibroblasts
Serpine12	1.00139e-11	0.770883	0.353	0.175	1.81041e-07	0_injured_3day_vs_0_injured_9day	Differentiating fibroblasts
Ms4a4d	1.11568e-11	0.529141	0.177	0.054	2.01704e-07	0_injured_3day_vs_0_injured_9day	Differentiating fibroblasts
Pkm1	1.16118e-11	0.577468	0.565	0.386	2.0993e-07	0_injured_3day_vs_0_injured_9day	Differentiating fibroblasts
Col3a12	1.30921e-11	-0.372734	0.985	0.987	2.36693e-07	0_injured_3day_vs_0_injured_9day	Differentiating fibroblasts
Spp12	1.32988e-11	-0.35004	0.58	0.347	2.40428e-07	0_injured_3day_vs_0_injured_9day	Differentiating fibroblasts
Dhrs31	1.38635e-11	0.673512	0.264	0.114	2.50637e-07	0_injured_3day_vs_0_injured_9day	Differentiating fibroblasts
Gm45401	1.45672e-11	0.491034	0.195	0.064	2.6336e-07	0_injured_3day_vs_0_injured_9day	Differentiating fibroblasts
Dpep12	1.50117e-11	0.558997	0.229	0.087	2.71397e-07	0_injured_3day_vs_0_injured_9day	Differentiating fibroblasts
Ece12	1.62609e-11	0.345267	0.377	0.195	2.9398e-07	0_injured_3day_vs_0_injured_9day	Differentiating fibroblasts
Ccl72	1.71441e-11	0.273375	0.318	0.147	3.09948e-07	0_injured_3day_vs_0_injured_9day	Differentiating fibroblasts
Cyp26b11	1.7231e-11	0.826978	0.115	0.02	3.11519e-07	0_injured_3day_vs_0_injured_9day	Differentiating fibroblasts
Tcirg11	1.81313e-11	0.389191	0.266	0.111	3.27797e-07	0_injured_3day_vs_0_injured_9day	Differentiating fibroblasts
Mif2	1.91275e-11	0.678991	0.459	0.29	3.45806e-07	0_injured_3day_vs_0_injured_9day	Differentiating fibroblasts
Fst2	2.25249e-11	0.629334	0.314	0.146	4.07227e-07	0_injured_3day_vs_0_injured_9day	Differentiating fibroblasts
Pygl	2.57635e-11	0.534212	0.234	0.09	4.65778e-07	0_injured_3day_vs_0_injured_9day	Differentiating fibroblasts
Rpl211	2.75824e-11	0.30288	0.264	0.108	4.98663e-07	0_injured_3day_vs_0_injured_9day	Differentiating fibroblasts
Acadl2	3.1877e-11	0.367233	0.277	0.121	5.76305e-07	0_injured_3day_vs_0_injured_9day	Differentiating fibroblasts
Lmna2	3.50124e-11	0.579787	0.708	0.55	6.32989e-07	0_injured_3day_vs_0_injured_9day	Differentiating fibroblasts
Gm100941	3.6706e-11	0.296795	0.186	0.06	6.63608e-07	0_injured_3day_vs_0_injured_9day	Differentiating fibroblasts
Kitl1	3.84042e-11	0.34607	0.26	0.106	6.9431e-07	0_injured_3day_vs_0_injured_9day	Differentiating fibroblasts
Actg11	4.36742e-11	0.390445	0.227	0.087	7.89586e-07	0_injured_3day_vs_0_injured_9day	Differentiating fibroblasts
Rps212	4.46081e-11	0.385087	0.861	0.762	8.06469e-07	0_injured_3day_vs_0_injured_9day	Differentiating fibroblasts
Rrbp12	4.51919e-11	0.375916	0.879	0.758	8.17024e-07	0_injured_3day_vs_0_injured_9day	Differentiating fibroblasts
Camk2n11	4.5984e-11	0.457589	0.232	0.09	8.31345e-07	0_injured_3day_vs_0_injured_9day	Differentiating fibroblasts
Cav12	4.61475e-11	0.465183	0.314	0.146	8.34301e-07	0_injured_3day_vs_0_injured_9day	Differentiating fibroblasts
Metrnl1	4.6492e-11	0.546281	0.279	0.125	8.40528e-07	0_injured_3day_vs_0_injured_9day	Differentiating fibroblasts
Metap22	4.6836e-11	0.543755	0.539	0.353	8.46749e-07	0_injured_3day_vs_0_injured_9day	Differentiating fibroblasts
Gm100931	4.85924e-11	0.468202	0.208	0.076	8.78501e-07	0_injured_3day_vs_0_injured_9day	Differentiating fibroblasts
Tpm21	4.928e-11	0.769301	0.42	0.249	8.90933e-07	0_injured_3day_vs_0_injured_9day	Differentiating fibroblasts
Apbb1ip1	5.07295e-11	0.460546	0.286	0.128	9.17139e-07	0_injured_3day_vs_0_injured_9day	Differentiating fibroblasts
Ctsc1	5.36896e-11	-0.887838	0.082	0.22	9.70655e-07	0_injured_3day_vs_0_injured_9day	Differentiating fibroblasts
Rpl361	5.71569e-11	0.470378	0.455	0.271	1.03334e-06	0_injured_3day_vs_0_injured_9day	Differentiating fibroblasts
Anxa11	5.7332e-11	0.538951	0.703	0.547	1.03651e-06	0_injured_3day_vs_0_injured_9day	Differentiating fibroblasts
Rpl121	6.28601e-11	0.506356	0.359	0.191	1.13645e-06	0_injured_3day_vs_0_injured_9day	Differentiating fibroblasts
Fibin2	6.63164e-11	-0.962306	0.165	0.324	1.19893e-06	0_injured_3day_vs_0_injured_9day	Differentiating fibroblasts
Gm4950	6.7278e-11	0.287472	0.188	0.063	1.21632e-06	0_injured_3day_vs_0_injured_9day	Differentiating fibroblasts
Crispld11	6.78525e-11	-0.84211	0.089	0.235	1.22671e-06	0_injured_3day_vs_0_injured_9day	Differentiating fibroblasts
Tma7	7.65906e-11	0.375658	0.223	0.086	1.38468e-06	0_injured_3day_vs_0_injured_9day	Differentiating fibroblasts
Acta21	8.40825e-11	0.92848	0.275	0.131	1.52013e-06	0_injured_3day_vs_0_injured_9day	Differentiating fibroblasts
Pmepa12	9.59266e-11	0.70551	0.571	0.405	1.73426e-06	0_injured_3day_vs_0_injured_9day	Differentiating fibroblasts
Xdh	9.67705e-11	0.353949	0.143	0.036	1.74951e-06	0_injured_3day_vs_0_injured_9day	Differentiating fibroblasts
C1ra2	9.96133e-11	0.626607	0.476	0.284	1.80091e-06	0_injured_3day_vs_0_injured_9day	Differentiating fibroblasts
Myh92	1.00358e-10	0.583135	0.513	0.325	1.81437e-06	0_injured_3day_vs_0_injured_9day	Differentiating fibroblasts
Slc16a31	1.02399e-10	0.277518	0.102	0.016	1.85128e-06	0_injured_3day_vs_0_injured_9day	Differentiating fibroblasts
Lrrc171	1.13703e-10	0.522257	0.509	0.325	2.05563e-06	0_injured_3day_vs_0_injured_9day	Differentiating fibroblasts
Gm97901	1.15408e-10	0.262249	0.128	0.029	2.08647e-06	0_injured_3day_vs_0_injured_9day	Differentiating fibroblasts
Copg21	1.27944e-10	-1.01397	0.121	0.271	2.31309e-06	0_injured_3day_vs_0_injured_9day	Differentiating fibroblasts
Eif2s21	1.29103e-10	0.38104	0.597	0.417	2.33406e-06	0_injured_3day_vs_0_injured_9day	Differentiating fibroblasts
Park71	1.33453e-10	0.359991	0.465	0.283	2.4127e-06	0_injured_3day_vs_0_injured_9day	Differentiating fibroblasts
Dcbld21	1.34444e-10	0.438988	0.372	0.204	2.43061e-06	0_injured_3day_vs_0_injured_9day	Differentiating fibroblasts
Nap1l11	1.35118e-10	0.504066	0.6	0.413	2.4428e-06	0_injured_3day_vs_0_injured_9day	Differentiating fibroblasts
Rpl192	1.36796e-10	0.494996	0.435	0.262	2.47313e-06	0_injured_3day_vs_0_injured_9day	Differentiating fibroblasts
Cox5b1	1.39525e-10	0.473557	0.509	0.343	2.52247e-06	0_injured_3day_vs_0_injured_9day	Differentiating fibroblasts
Ltbp21	1.68933e-10	0.496971	0.13	0.031	3.05415e-06	0_injured_3day_vs_0_injured_9day	Differentiating fibroblasts
S100a131	1.72962e-10	0.527561	0.545	0.363	3.12698e-06	0_injured_3day_vs_0_injured_9day	Differentiating fibroblasts
Pet1001	1.82143e-10	0.443948	0.292	0.138	3.29296e-06	0_injured_3day_vs_0_injured_9day	Differentiating fibroblasts
Dpysl32	1.92941e-10	0.422977	0.662	0.485	3.48817e-06	0_injured_3day_vs_0_injured_9day	Differentiating fibroblasts
Uqcr112	1.96745e-10	0.455182	0.519	0.351	3.55695e-06	0_injured_3day_vs_0_injured_9day	Differentiating fibroblasts
Rtn42	2.00797e-10	0.368268	0.675	0.493	3.6302e-06	0_injured_3day_vs_0_injured_9day	Differentiating fibroblasts
Tpt11	2.15473e-10	0.478708	0.511	0.337	3.89554e-06	0_injured_3day_vs_0_injured_9day	Differentiating fibroblasts
Rps121	2.19973e-10	0.466449	0.331	0.166	3.9769e-06	0_injured_3day_vs_0_injured_9day	Differentiating fibroblasts
Hspb13	2.29163e-10	0.280922	0.193	0.067	4.14305e-06	0_injured_3day_vs_0_injured_9day	Differentiating fibroblasts
Cox171	2.42085e-10	0.47437	0.413	0.236	4.37665e-06	0_injured_3day_vs_0_injured_9day	Differentiating fibroblasts
Rpl51	2.73714e-10	0.309444	0.21	0.08	4.94848e-06	0_injured_3day_vs_0_injured_9day	Differentiating fibroblasts
Sepw1	2.9645e-10	0.420554	0.641	0.477	5.35952e-06	0_injured_3day_vs_0_injured_9day	Differentiating fibroblasts
Wnt2	3.42873e-10	0.346886	0.115	0.025	6.1988e-06	0_injured_3day_vs_0_injured_9day	Differentiating fibroblasts
Gpr1332	3.48241e-10	0.613555	0.275	0.13	6.29586e-06	0_injured_3day_vs_0_injured_9day	Differentiating fibroblasts
Ntn11	3.78829e-10	0.451549	0.203	0.076	6.84885e-06	0_injured_3day_vs_0_injured_9day	Differentiating fibroblasts
Dusp13	3.83136e-10	0.331316	0.53	0.325	6.92671e-06	0_injured_3day_vs_0_injured_9day	Differentiating fibroblasts
Ndufa14	4.08695e-10	0.389993	0.476	0.308	7.3888e-06	0_injured_3day_vs_0_injured_9day	Differentiating fibroblasts
Fbn22	4.60597e-10	-0.970269	0.279	0.427	8.32713e-06	0_injured_3day_vs_0_injured_9day	Differentiating fibroblasts
Gm50931	4.68984e-10	0.455701	0.229	0.096	8.47877e-06	0_injured_3day_vs_0_injured_9day	Differentiating fibroblasts
Pdap12	5.41576e-10	0.487261	0.595	0.418	9.79116e-06	0_injured_3day_vs_0_injured_9day	Differentiating fibroblasts
Gm102501	5.77969e-10	0.404408	0.392	0.23	1.04491e-05	0_injured_3day_vs_0_injured_9day	Differentiating fibroblasts
Glipr22	5.88601e-10	0.441455	0.413	0.254	1.06413e-05	0_injured_3day_vs_0_injured_9day	Differentiating fibroblasts
Bnip3	6.06476e-10	0.304244	0.134	0.035	1.09645e-05	0_injured_3day_vs_0_injured_9day	Differentiating fibroblasts
Gngt22	6.51993e-10	0.270986	0.242	0.102	1.17874e-05	0_injured_3day_vs_0_injured_9day	Differentiating fibroblasts
Lrp12	6.55513e-10	0.470504	0.732	0.554	1.1851e-05	0_injured_3day_vs_0_injured_9day	Differentiating fibroblasts
Rplp12	6.75663e-10	0.306073	0.937	0.878	1.22153e-05	0_injured_3day_vs_0_injured_9day	Differentiating fibroblasts
Ankrd121	7.06333e-10	0.621274	0.396	0.226	1.27698e-05	0_injured_3day_vs_0_injured_9day	Differentiating fibroblasts
Spsb12	7.26475e-10	0.367259	0.249	0.111	1.31339e-05	0_injured_3day_vs_0_injured_9day	Differentiating fibroblasts
Ap1s11	7.85737e-10	0.475621	0.327	0.168	1.42053e-05	0_injured_3day_vs_0_injured_9day	Differentiating fibroblasts
2001-11-01	7.85886e-10	0.540294	0.323	0.159	1.4208e-05	0_injured_3day_vs_0_injured_9day	Differentiating fibroblasts
Tpm31	7.89029e-10	0.489196	0.602	0.465	1.42649e-05	0_injured_3day_vs_0_injured_9day	Differentiating fibroblasts
Mgp2	8.23923e-10	-0.395161	0.619	0.695	1.48957e-05	0_injured_3day_vs_0_injured_9day	Differentiating fibroblasts
Fmo22	8.34173e-10	0.601228	0.132	0.035	1.5081e-05	0_injured_3day_vs_0_injured_9day	Differentiating fibroblasts
Atp5g32	8.88458e-10	0.470688	0.613	0.453	1.60624e-05	0_injured_3day_vs_0_injured_9day	Differentiating fibroblasts
Rpl23a1	9.11782e-10	0.405391	0.229	0.099	1.64841e-05	0_injured_3day_vs_0_injured_9day	Differentiating fibroblasts
Gng51	1.06714e-09	0.599784	0.361	0.213	1.92929e-05	0_injured_3day_vs_0_injured_9day	Differentiating fibroblasts
Tomm71	1.17035e-09	0.45537	0.504	0.34	2.11587e-05	0_injured_3day_vs_0_injured_9day	Differentiating fibroblasts
1700025G04Rik1	1.31551e-09	0.354495	0.253	0.112	2.37832e-05	0_injured_3day_vs_0_injured_9day	Differentiating fibroblasts
Slc1a52	1.43711e-09	0.475854	0.264	0.125	2.59815e-05	0_injured_3day_vs_0_injured_9day	Differentiating fibroblasts
Nsa21	1.46065e-09	0.448842	0.203	0.082	2.64072e-05	0_injured_3day_vs_0_injured_9day	Differentiating fibroblasts
Gm102211	1.78828e-09	0.26669	0.141	0.041	3.23304e-05	0_injured_3day_vs_0_injured_9day	Differentiating fibroblasts
Serpinb6a2	1.85149e-09	0.306953	0.697	0.545	3.34731e-05	0_injured_3day_vs_0_injured_9day	Differentiating fibroblasts
Pttg1	1.92216e-09	0.350078	0.156	0.05	3.47508e-05	0_injured_3day_vs_0_injured_9day	Differentiating fibroblasts
Smc41	1.97078e-09	0.587727	0.435	0.258	3.56298e-05	0_injured_3day_vs_0_injured_9day	Differentiating fibroblasts
Col15a12	2.09439e-09	-0.770029	0.335	0.481	3.78644e-05	0_injured_3day_vs_0_injured_9day	Differentiating fibroblasts
Fam32a1	2.09728e-09	0.429811	0.39	0.223	3.79168e-05	0_injured_3day_vs_0_injured_9day	Differentiating fibroblasts
Ildr22	2.19429e-09	0.291931	0.102	0.02	3.96705e-05	0_injured_3day_vs_0_injured_9day	Differentiating fibroblasts
Nova11	2.32392e-09	0.343012	0.206	0.082	4.20141e-05	0_injured_3day_vs_0_injured_9day	Differentiating fibroblasts
Gstm12	2.4988e-09	0.405606	0.247	0.114	4.51758e-05	0_injured_3day_vs_0_injured_9day	Differentiating fibroblasts
Fscn12	2.72445e-09	0.552107	0.418	0.258	4.92553e-05	0_injured_3day_vs_0_injured_9day	Differentiating fibroblasts
Gm54591	2.73942e-09	0.367336	0.104	0.022	4.95259e-05	0_injured_3day_vs_0_injured_9day	Differentiating fibroblasts
Rps192	3.20159e-09	0.514461	0.771	0.653	5.78815e-05	0_injured_3day_vs_0_injured_9day	Differentiating fibroblasts
Rps172	3.83104e-09	0.397958	0.31	0.163	6.92613e-05	0_injured_3day_vs_0_injured_9day	Differentiating fibroblasts
Tuba1c1	3.88597e-09	0.624396	0.247	0.118	7.02544e-05	0_injured_3day_vs_0_injured_9day	Differentiating fibroblasts
Ackr31	3.98942e-09	0.586941	0.284	0.144	7.21247e-05	0_injured_3day_vs_0_injured_9day	Differentiating fibroblasts
Tgm22	4.08531e-09	0.422133	0.279	0.133	7.38583e-05	0_injured_3day_vs_0_injured_9day	Differentiating fibroblasts
Fkbp1a1	4.63722e-09	0.496321	0.595	0.437	8.38363e-05	0_injured_3day_vs_0_injured_9day	Differentiating fibroblasts
Cox7c1	4.79818e-09	0.30531	0.361	0.2	8.67464e-05	0_injured_3day_vs_0_injured_9day	Differentiating fibroblasts
Fhl12	4.97032e-09	0.462215	0.31	0.163	8.98584e-05	0_injured_3day_vs_0_injured_9day	Differentiating fibroblasts
Pdlim21	5.69403e-09	0.488495	0.366	0.216	0.000102942	0_injured_3day_vs_0_injured_9day	Differentiating fibroblasts
6330403K07Rik1	5.82591e-09	-0.583968	0.048	0.157	0.000105327	0_injured_3day_vs_0_injured_9day	Differentiating fibroblasts
Gfpt21	6.61786e-09	0.440953	0.251	0.117	0.000119644	0_injured_3day_vs_0_injured_9day	Differentiating fibroblasts
Rpl381	7.12803e-09	0.441214	0.537	0.395	0.000128868	0_injured_3day_vs_0_injured_9day	Differentiating fibroblasts
Serping12	7.53768e-09	-0.653416	0.675	0.701	0.000136274	0_injured_3day_vs_0_injured_9day	Differentiating fibroblasts
Adamts52	7.7505e-09	0.57692	0.387	0.23	0.000140121	0_injured_3day_vs_0_injured_9day	Differentiating fibroblasts
Pdcd51	8.10422e-09	0.400325	0.281	0.143	0.000146516	0_injured_3day_vs_0_injured_9day	Differentiating fibroblasts
Pgk11	8.58867e-09	0.281699	0.134	0.041	0.000155275	0_injured_3day_vs_0_injured_9day	Differentiating fibroblasts
Adm1	9.00353e-09	0.40138	0.139	0.044	0.000162775	0_injured_3day_vs_0_injured_9day	Differentiating fibroblasts
Wdr12	9.30043e-09	0.497644	0.368	0.214	0.000168143	0_injured_3day_vs_0_injured_9day	Differentiating fibroblasts
Hdgf2	1.22631e-08	0.48167	0.468	0.306	0.000221705	0_injured_3day_vs_0_injured_9day	Differentiating fibroblasts
Lasp11	1.22918e-08	0.395836	0.398	0.243	0.000222224	0_injured_3day_vs_0_injured_9day	Differentiating fibroblasts
Ddx51	1.2445e-08	-0.569984	0.714	0.706	0.000224993	0_injured_3day_vs_0_injured_9day	Differentiating fibroblasts
Rps102	1.24775e-08	0.378509	0.805	0.69	0.000225581	0_injured_3day_vs_0_injured_9day	Differentiating fibroblasts
Lepr1	1.30461e-08	-0.516949	0.16	0.306	0.000235861	0_injured_3day_vs_0_injured_9day	Differentiating fibroblasts
Ntrk2	1.3584e-08	0.388317	0.149	0.051	0.000245584	0_injured_3day_vs_0_injured_9day	Differentiating fibroblasts
Ndn	1.42596e-08	0.300841	0.416	0.251	0.000257799	0_injured_3day_vs_0_injured_9day	Differentiating fibroblasts
Cilp2	1.44104e-08	-0.971064	0.396	0.517	0.000260526	0_injured_3day_vs_0_injured_9day	Differentiating fibroblasts
Loxl31	1.48289e-08	0.413014	0.372	0.22	0.000268093	0_injured_3day_vs_0_injured_9day	Differentiating fibroblasts
Ppp1r12b1	1.59854e-08	0.372456	0.128	0.038	0.000289001	0_injured_3day_vs_0_injured_9day	Differentiating fibroblasts
Actn12	1.6314e-08	0.441073	0.569	0.414	0.00029494	0_injured_3day_vs_0_injured_9day	Differentiating fibroblasts
Gstp11	1.66294e-08	0.451221	0.379	0.232	0.000300643	0_injured_3day_vs_0_injured_9day	Differentiating fibroblasts
Ywhae2	1.66397e-08	0.366192	0.654	0.496	0.00030083	0_injured_3day_vs_0_injured_9day	Differentiating fibroblasts
Col8a11	1.72433e-08	-0.672868	0.543	0.637	0.000311742	0_injured_3day_vs_0_injured_9day	Differentiating fibroblasts
Ptgs21	1.73374e-08	0.35538	0.117	0.032	0.000313442	0_injured_3day_vs_0_injured_9day	Differentiating fibroblasts
Birc51	1.80511e-08	0.474155	0.173	0.067	0.000326346	0_injured_3day_vs_0_injured_9day	Differentiating fibroblasts
Ifitm32	1.85593e-08	0.392211	0.816	0.665	0.000335533	0_injured_3day_vs_0_injured_9day	Differentiating fibroblasts
Tes1	1.90689e-08	0.298839	0.18	0.071	0.000344747	0_injured_3day_vs_0_injured_9day	Differentiating fibroblasts
Eef1a12	1.90904e-08	0.437816	0.777	0.669	0.000345136	0_injured_3day_vs_0_injured_9day	Differentiating fibroblasts
Mpdz2	2.10785e-08	0.287529	0.344	0.19	0.000381079	0_injured_3day_vs_0_injured_9day	Differentiating fibroblasts
Dap2	2.21233e-08	0.420476	0.519	0.362	0.000399968	0_injured_3day_vs_0_injured_9day	Differentiating fibroblasts
Pid12	2.21238e-08	0.453348	0.184	0.076	0.000399977	0_injured_3day_vs_0_injured_9day	Differentiating fibroblasts
Tmem1002	2.3706e-08	0.776548	0.318	0.181	0.00042858	0_injured_3day_vs_0_injured_9day	Differentiating fibroblasts
Myl61	2.37229e-08	0.42117	0.623	0.472	0.000428886	0_injured_3day_vs_0_injured_9day	Differentiating fibroblasts
Cxcl142	2.43066e-08	-1.21259	0.216	0.348	0.00043944	0_injured_3day_vs_0_injured_9day	Differentiating fibroblasts
Eef22	2.4557e-08	0.369071	0.76	0.638	0.000443967	0_injured_3day_vs_0_injured_9day	Differentiating fibroblasts
Ndufs5	2.49739e-08	0.26351	0.197	0.085	0.000451504	0_injured_3day_vs_0_injured_9day	Differentiating fibroblasts
Gdf102	2.51371e-08	0.618915	0.26	0.133	0.000454454	0_injured_3day_vs_0_injured_9day	Differentiating fibroblasts
Lsm51	2.52482e-08	0.264077	0.152	0.054	0.000456463	0_injured_3day_vs_0_injured_9day	Differentiating fibroblasts
Meox21	2.56925e-08	-0.883755	0.29	0.421	0.000464494	0_injured_3day_vs_0_injured_9day	Differentiating fibroblasts
Svep12	2.67705e-08	-0.466682	0.212	0.359	0.000483984	0_injured_3day_vs_0_injured_9day	Differentiating fibroblasts
Hnrnpa2b11	2.69475e-08	-0.524132	0.766	0.765	0.000487185	0_injured_3day_vs_0_injured_9day	Differentiating fibroblasts
Ifi2041	2.7012e-08	0.450411	0.383	0.229	0.00048835	0_injured_3day_vs_0_injured_9day	Differentiating fibroblasts
Gm7589	2.78816e-08	0.410357	0.206	0.09	0.000504071	0_injured_3day_vs_0_injured_9day	Differentiating fibroblasts
Cyr612	2.87392e-08	0.445557	0.543	0.37	0.000519576	0_injured_3day_vs_0_injured_9day	Differentiating fibroblasts
Gpx41	2.93193e-08	0.321096	0.221	0.101	0.000530064	0_injured_3day_vs_0_injured_9day	Differentiating fibroblasts
Heg12	2.94278e-08	0.563123	0.383	0.233	0.000532025	0_injured_3day_vs_0_injured_9day	Differentiating fibroblasts
Cap11	3.05206e-08	0.368136	0.398	0.242	0.000551782	0_injured_3day_vs_0_injured_9day	Differentiating fibroblasts
Hdac11	3.05486e-08	0.547114	0.286	0.153	0.000552288	0_injured_3day_vs_0_injured_9day	Differentiating fibroblasts
Mafb2	3.23384e-08	-0.618824	0.121	0.248	0.000584647	0_injured_3day_vs_0_injured_9day	Differentiating fibroblasts
Txn12	3.57347e-08	0.368705	0.714	0.593	0.000646048	0_injured_3day_vs_0_injured_9day	Differentiating fibroblasts
Cnn2	3.60365e-08	0.430968	0.368	0.226	0.000651503	0_injured_3day_vs_0_injured_9day	Differentiating fibroblasts
Gnb11	3.74348e-08	0.554198	0.532	0.394	0.000676783	0_injured_3day_vs_0_injured_9day	Differentiating fibroblasts
Hebp21	3.80855e-08	0.363721	0.128	0.041	0.000688548	0_injured_3day_vs_0_injured_9day	Differentiating fibroblasts
Klf92	3.8976e-08	0.434716	0.327	0.181	0.000704646	0_injured_3day_vs_0_injured_9day	Differentiating fibroblasts
Rpl62	3.90513e-08	0.507293	0.61	0.475	0.000706009	0_injured_3day_vs_0_injured_9day	Differentiating fibroblasts
Ptplad2	3.97136e-08	0.286284	0.167	0.064	0.000717982	0_injured_3day_vs_0_injured_9day	Differentiating fibroblasts
Gas72	4.15173e-08	0.658544	0.344	0.201	0.000750591	0_injured_3day_vs_0_injured_9day	Differentiating fibroblasts
Ahnak21	4.40631e-08	0.682249	0.299	0.163	0.000796616	0_injured_3day_vs_0_injured_9day	Differentiating fibroblasts
Eif5b2	4.42063e-08	0.287905	0.649	0.499	0.000799206	0_injured_3day_vs_0_injured_9day	Differentiating fibroblasts
Socs21	4.45255e-08	-0.807945	0.106	0.226	0.000804977	0_injured_3day_vs_0_injured_9day	Differentiating fibroblasts
Papss21	4.5868e-08	0.333073	0.141	0.048	0.000829248	0_injured_3day_vs_0_injured_9day	Differentiating fibroblasts
Ostf1	4.77703e-08	0.266467	0.387	0.23	0.00086364	0_injured_3day_vs_0_injured_9day	Differentiating fibroblasts
Ddr21	4.86005e-08	0.499124	0.468	0.313	0.000878648	0_injured_3day_vs_0_injured_9day	Differentiating fibroblasts
Fzd11	5.11724e-08	-0.627507	0.18	0.315	0.000925147	0_injured_3day_vs_0_injured_9day	Differentiating fibroblasts
Klf42	5.19885e-08	0.450256	0.398	0.241	0.000939901	0_injured_3day_vs_0_injured_9day	Differentiating fibroblasts
Ghr1	5.53888e-08	-0.604417	0.089	0.206	0.00100137	0_injured_3day_vs_0_injured_9day	Differentiating fibroblasts
Hist1h2al1	5.72299e-08	0.761848	0.208	0.096	0.00103466	0_injured_3day_vs_0_injured_9day	Differentiating fibroblasts
Aldh1a32	5.79566e-08	-0.904965	0.119	0.239	0.0010478	0_injured_3day_vs_0_injured_9day	Differentiating fibroblasts
Rin21	5.8531e-08	0.33823	0.255	0.13	0.00105818	0_injured_3day_vs_0_injured_9day	Differentiating fibroblasts
Myo9b1	5.9222e-08	0.260755	0.197	0.085	0.00107067	0_injured_3day_vs_0_injured_9day	Differentiating fibroblasts
Rpl171	6.2275e-08	0.307949	0.219	0.101	0.00112587	0_injured_3day_vs_0_injured_9day	Differentiating fibroblasts
Sp1001	6.45666e-08	0.313997	0.149	0.054	0.0011673	0_injured_3day_vs_0_injured_9day	Differentiating fibroblasts
Slco3a1	6.52577e-08	0.379289	0.145	0.052	0.00117979	0_injured_3day_vs_0_injured_9day	Differentiating fibroblasts
Cbx31	6.56965e-08	0.449835	0.273	0.144	0.00118773	0_injured_3day_vs_0_injured_9day	Differentiating fibroblasts
Abca8a2	6.81274e-08	-0.936806	0.281	0.413	0.00123168	0_injured_3day_vs_0_injured_9day	Differentiating fibroblasts
Sec61b2	7.01782e-08	0.446845	0.656	0.544	0.00126875	0_injured_3day_vs_0_injured_9day	Differentiating fibroblasts
Mmp21	7.451e-08	-0.519027	0.764	0.776	0.00134707	0_injured_3day_vs_0_injured_9day	Differentiating fibroblasts
Rpl92	8.30401e-08	0.274467	0.232	0.112	0.00150128	0_injured_3day_vs_0_injured_9day	Differentiating fibroblasts
Penk2	8.55309e-08	0.519524	0.455	0.3	0.00154631	0_injured_3day_vs_0_injured_9day	Differentiating fibroblasts
Mfap52	9.42523e-08	-0.515511	0.801	0.777	0.00170399	0_injured_3day_vs_0_injured_9day	Differentiating fibroblasts
Cxcl9	9.56421e-08	-0.419525	0.019	0.101	0.00172911	0_injured_3day_vs_0_injured_9day	Differentiating fibroblasts
Tomm51	9.78021e-08	0.273566	0.284	0.155	0.00176816	0_injured_3day_vs_0_injured_9day	Differentiating fibroblasts
Pcsk51	9.9516e-08	0.430652	0.387	0.243	0.00179915	0_injured_3day_vs_0_injured_9day	Differentiating fibroblasts
Crispld22	1.00664e-07	0.457793	0.16	0.063	0.0018199	0_injured_3day_vs_0_injured_9day	Differentiating fibroblasts
Clip11	1.0548e-07	0.484871	0.24	0.121	0.00190698	0_injured_3day_vs_0_injured_9day	Differentiating fibroblasts
Nes1	1.06135e-07	-0.694055	0.087	0.198	0.00191881	0_injured_3day_vs_0_injured_9day	Differentiating fibroblasts
Acpl2	1.10772e-07	0.254622	0.121	0.038	0.00200265	0_injured_3day_vs_0_injured_9day	Differentiating fibroblasts
Flnb2	1.14156e-07	0.375638	0.26	0.134	0.00206383	0_injured_3day_vs_0_injured_9day	Differentiating fibroblasts
Rpl322	1.2211e-07	0.270377	0.842	0.757	0.00220763	0_injured_3day_vs_0_injured_9day	Differentiating fibroblasts
Epha31	1.25195e-07	-0.511987	0.065	0.172	0.00226339	0_injured_3day_vs_0_injured_9day	Differentiating fibroblasts
Nfix1	1.26644e-07	0.294549	0.665	0.515	0.0022896	0_injured_3day_vs_0_injured_9day	Differentiating fibroblasts
Ap2b11	1.28227e-07	0.286933	0.24	0.118	0.00231822	0_injured_3day_vs_0_injured_9day	Differentiating fibroblasts
Zfhx31	1.32397e-07	0.625896	0.251	0.127	0.00239361	0_injured_3day_vs_0_injured_9day	Differentiating fibroblasts
Tmco11	1.34144e-07	0.330727	0.433	0.29	0.00242518	0_injured_3day_vs_0_injured_9day	Differentiating fibroblasts
Trappc1	1.37206e-07	0.286296	0.258	0.136	0.00248055	0_injured_3day_vs_0_injured_9day	Differentiating fibroblasts
F32	1.40291e-07	0.347384	0.201	0.092	0.00253633	0_injured_3day_vs_0_injured_9day	Differentiating fibroblasts
Aldh21	1.45643e-07	0.291048	0.368	0.226	0.00263308	0_injured_3day_vs_0_injured_9day	Differentiating fibroblasts
Cdc42ep21	1.47088e-07	0.260049	0.158	0.061	0.0026592	0_injured_3day_vs_0_injured_9day	Differentiating fibroblasts
Gpc12	1.53448e-07	-0.666214	0.136	0.257	0.00277418	0_injured_3day_vs_0_injured_9day	Differentiating fibroblasts
Bgn2	1.53886e-07	0.407488	0.885	0.805	0.00278211	0_injured_3day_vs_0_injured_9day	Differentiating fibroblasts
Itga1	1.58148e-07	-0.409439	0.039	0.131	0.00285915	0_injured_3day_vs_0_injured_9day	Differentiating fibroblasts
Podxl2	1.63674e-07	-0.564495	0.05	0.146	0.00295907	0_injured_3day_vs_0_injured_9day	Differentiating fibroblasts
Hcfc1r12	1.73085e-07	0.423477	0.539	0.385	0.00312921	0_injured_3day_vs_0_injured_9day	Differentiating fibroblasts
Sema3c1	1.79095e-07	0.7364	0.335	0.207	0.00323787	0_injured_3day_vs_0_injured_9day	Differentiating fibroblasts
Cox4i12	1.85021e-07	0.327469	0.82	0.671	0.003345	0_injured_3day_vs_0_injured_9day	Differentiating fibroblasts
Flnc1	1.86743e-07	0.426207	0.273	0.147	0.00337613	0_injured_3day_vs_0_injured_9day	Differentiating fibroblasts
Slc43a31	1.86951e-07	0.463254	0.271	0.146	0.00337988	0_injured_3day_vs_0_injured_9day	Differentiating fibroblasts
Npc22	1.911e-07	0.339897	0.714	0.592	0.0034549	0_injured_3day_vs_0_injured_9day	Differentiating fibroblasts
1500012F01Rik2	1.97222e-07	0.61573	0.535	0.404	0.00356558	0_injured_3day_vs_0_injured_9day	Differentiating fibroblasts
Kirrel2	2.0408e-07	0.318604	0.223	0.106	0.00368956	0_injured_3day_vs_0_injured_9day	Differentiating fibroblasts
Txndc52	2.04528e-07	0.404936	0.617	0.48	0.00369767	0_injured_3day_vs_0_injured_9day	Differentiating fibroblasts
Olfm1	2.09907e-07	0.298095	0.162	0.067	0.00379492	0_injured_3day_vs_0_injured_9day	Differentiating fibroblasts
2010-09-01	2.09979e-07	0.380938	0.184	0.082	0.0037962	0_injured_3day_vs_0_injured_9day	Differentiating fibroblasts
Psenen	2.15537e-07	0.300763	0.249	0.128	0.0038967	0_injured_3day_vs_0_injured_9day	Differentiating fibroblasts
Ldha2	2.25801e-07	0.447174	0.58	0.446	0.00408226	0_injured_3day_vs_0_injured_9day	Differentiating fibroblasts
Marcksl12	2.28698e-07	-0.715945	0.251	0.367	0.00413463	0_injured_3day_vs_0_injured_9day	Differentiating fibroblasts
Chst121	2.3005e-07	0.393723	0.253	0.131	0.00415907	0_injured_3day_vs_0_injured_9day	Differentiating fibroblasts
Abca8b2	2.518e-07	-0.71178	0.106	0.217	0.0045523	0_injured_3day_vs_0_injured_9day	Differentiating fibroblasts
Bloc1s12	2.66015e-07	0.360423	0.182	0.082	0.00480928	0_injured_3day_vs_0_injured_9day	Differentiating fibroblasts
Cebpb1	2.7919e-07	0.320337	0.348	0.204	0.00504748	0_injured_3day_vs_0_injured_9day	Differentiating fibroblasts
Dpysl22	3.12405e-07	0.346643	0.29	0.163	0.00564797	0_injured_3day_vs_0_injured_9day	Differentiating fibroblasts
Eno11	3.16057e-07	0.548417	0.262	0.15	0.005714	0_injured_3day_vs_0_injured_9day	Differentiating fibroblasts
Npm12	3.40777e-07	0.402483	0.658	0.56	0.00616091	0_injured_3day_vs_0_injured_9day	Differentiating fibroblasts
Cd811	3.49018e-07	-0.543387	0.619	0.659	0.0063099	0_injured_3day_vs_0_injured_9day	Differentiating fibroblasts
Mndal1	3.53691e-07	0.596898	0.327	0.201	0.00639437	0_injured_3day_vs_0_injured_9day	Differentiating fibroblasts
Mfap41	3.59209e-07	-0.727252	0.325	0.456	0.00649415	0_injured_3day_vs_0_injured_9day	Differentiating fibroblasts
Smad71	3.81311e-07	0.280682	0.115	0.038	0.00689372	0_injured_3day_vs_0_injured_9day	Differentiating fibroblasts
Aida1	4.08222e-07	0.34773	0.303	0.172	0.00738025	0_injured_3day_vs_0_injured_9day	Differentiating fibroblasts
Tspan33	4.0866e-07	-0.700018	0.357	0.459	0.00738816	0_injured_3day_vs_0_injured_9day	Differentiating fibroblasts
Nucb21	4.60458e-07	0.408674	0.504	0.367	0.00832462	0_injured_3day_vs_0_injured_9day	Differentiating fibroblasts
Tiam1	4.63947e-07	0.475412	0.119	0.041	0.00838769	0_injured_3day_vs_0_injured_9day	Differentiating fibroblasts
Mfhas1	4.64872e-07	0.375581	0.177	0.08	0.00840443	0_injured_3day_vs_0_injured_9day	Differentiating fibroblasts
Osr11	4.80156e-07	0.35173	0.268	0.149	0.00868075	0_injured_3day_vs_0_injured_9day	Differentiating fibroblasts
Cfb1	4.94998e-07	0.415673	0.242	0.127	0.00894906	0_injured_3day_vs_0_injured_9day	Differentiating fibroblasts
H2-K11	5.04481e-07	0.329411	0.615	0.446	0.00912051	0_injured_3day_vs_0_injured_9day	Differentiating fibroblasts
Ptms1	5.41461e-07	0.354038	0.736	0.631	0.00978906	0_injured_3day_vs_0_injured_9day	Differentiating fibroblasts
Ecm22	5.67901e-07	-0.501758	0.186	0.303	0.0102671	0_injured_3day_vs_0_injured_9day	Differentiating fibroblasts
Zcchc24	5.74017e-07	0.33056	0.396	0.252	0.0103777	0_injured_3day_vs_0_injured_9day	Differentiating fibroblasts
Stk381	5.90328e-07	0.299939	0.416	0.274	0.0106725	0_injured_3day_vs_0_injured_9day	Differentiating fibroblasts
Vgll3	5.98997e-07	0.34696	0.136	0.052	0.0108293	0_injured_3day_vs_0_injured_9day	Differentiating fibroblasts
Rps112	6.04384e-07	0.354691	0.732	0.625	0.0109267	0_injured_3day_vs_0_injured_9day	Differentiating fibroblasts
Zeb22	6.05199e-07	0.268873	0.437	0.289	0.0109414	0_injured_3day_vs_0_injured_9day	Differentiating fibroblasts
Rpl312	6.38815e-07	0.342976	0.496	0.36	0.0115491	0_injured_3day_vs_0_injured_9day	Differentiating fibroblasts
Hoxc81	6.54369e-07	0.38773	0.152	0.063	0.0118303	0_injured_3day_vs_0_injured_9day	Differentiating fibroblasts
Hmmr1	6.83446e-07	0.374589	0.104	0.032	0.012356	0_injured_3day_vs_0_injured_9day	Differentiating fibroblasts
Slc7a21	6.83561e-07	-0.600335	0.084	0.185	0.0123581	0_injured_3day_vs_0_injured_9day	Differentiating fibroblasts
Naca2	6.96644e-07	0.415174	0.556	0.429	0.0125946	0_injured_3day_vs_0_injured_9day	Differentiating fibroblasts
Rock21	7.44365e-07	0.316057	0.541	0.398	0.0134574	0_injured_3day_vs_0_injured_9day	Differentiating fibroblasts
Decr1	7.70736e-07	0.274242	0.242	0.125	0.0139341	0_injured_3day_vs_0_injured_9day	Differentiating fibroblasts
Fam129a2	8.27215e-07	0.381582	0.145	0.06	0.0149552	0_injured_3day_vs_0_injured_9day	Differentiating fibroblasts
Rps13	8.28282e-07	0.281618	0.26	0.138	0.0149745	0_injured_3day_vs_0_injured_9day	Differentiating fibroblasts
Gpx72	8.47659e-07	0.348321	0.509	0.354	0.0153248	0_injured_3day_vs_0_injured_9day	Differentiating fibroblasts
Rpl72	8.65846e-07	0.439262	0.576	0.465	0.0156536	0_injured_3day_vs_0_injured_9day	Differentiating fibroblasts
Cald12	8.67132e-07	0.326292	0.816	0.687	0.0156769	0_injured_3day_vs_0_injured_9day	Differentiating fibroblasts
Ilk1	8.71458e-07	0.318501	0.403	0.261	0.0157551	0_injured_3day_vs_0_injured_9day	Differentiating fibroblasts
Ccl112	8.77024e-07	0.297599	0.26	0.143	0.0158557	0_injured_3day_vs_0_injured_9day	Differentiating fibroblasts
Igsf31	8.8946e-07	-0.776466	0.29	0.401	0.0160805	0_injured_3day_vs_0_injured_9day	Differentiating fibroblasts
Cox7b2	9.02419e-07	0.313274	0.645	0.509	0.0163148	0_injured_3day_vs_0_injured_9day	Differentiating fibroblasts
Gnai21	9.37691e-07	0.38891	0.634	0.51	0.0169525	0_injured_3day_vs_0_injured_9day	Differentiating fibroblasts
Arl4c2	9.73635e-07	0.565094	0.26	0.147	0.0176023	0_injured_3day_vs_0_injured_9day	Differentiating fibroblasts
Dlc11	9.8395e-07	0.378179	0.297	0.178	0.0177888	0_injured_3day_vs_0_injured_9day	Differentiating fibroblasts
Lrrn4cl2	9.84312e-07	0.492687	0.251	0.136	0.0177954	0_injured_3day_vs_0_injured_9day	Differentiating fibroblasts
Atp6v1a1	9.91636e-07	0.419202	0.281	0.16	0.0179278	0_injured_3day_vs_0_injured_9day	Differentiating fibroblasts
Ppic1	1.03149e-06	-0.518487	0.675	0.681	0.0186483	0_injured_3day_vs_0_injured_9day	Differentiating fibroblasts
Ptgis2	1.03372e-06	0.473875	0.214	0.109	0.0186886	0_injured_3day_vs_0_injured_9day	Differentiating fibroblasts
Pdlim12	1.05699e-06	0.341068	0.247	0.137	0.0191093	0_injured_3day_vs_0_injured_9day	Differentiating fibroblasts
Lrp61	1.05827e-06	0.430018	0.452	0.315	0.0191325	0_injured_3day_vs_0_injured_9day	Differentiating fibroblasts
Rpl33	1.07187e-06	0.273364	0.145	0.058	0.0193783	0_injured_3day_vs_0_injured_9day	Differentiating fibroblasts
Ccnb2	1.10112e-06	0.443444	0.123	0.045	0.0199071	0_injured_3day_vs_0_injured_9day	Differentiating fibroblasts
Baiap2	1.11291e-06	0.413965	0.197	0.096	0.0201203	0_injured_3day_vs_0_injured_9day	Differentiating fibroblasts
Cenpe1	1.1442e-06	0.563388	0.128	0.048	0.0206859	0_injured_3day_vs_0_injured_9day	Differentiating fibroblasts
Lmf2	1.1601e-06	0.275641	0.147	0.06	0.0209735	0_injured_3day_vs_0_injured_9day	Differentiating fibroblasts
Ndufa22	1.23097e-06	0.301317	0.623	0.491	0.0222547	0_injured_3day_vs_0_injured_9day	Differentiating fibroblasts
Ccdc3	1.2653e-06	0.405474	0.288	0.169	0.0228754	0_injured_3day_vs_0_injured_9day	Differentiating fibroblasts
Eif4ebp11	1.3094e-06	0.419491	0.284	0.169	0.0236726	0_injured_3day_vs_0_injured_9day	Differentiating fibroblasts
Gas12	1.32857e-06	0.298406	0.489	0.335	0.0240192	0_injured_3day_vs_0_injured_9day	Differentiating fibroblasts
mt-Nd12	1.34417e-06	-0.531327	0.792	0.819	0.0243012	0_injured_3day_vs_0_injured_9day	Differentiating fibroblasts
Zmiz11	1.50157e-06	0.404179	0.372	0.241	0.0271468	0_injured_3day_vs_0_injured_9day	Differentiating fibroblasts
Fau1	1.50263e-06	0.322827	0.355	0.223	0.027166	0_injured_3day_vs_0_injured_9day	Differentiating fibroblasts
App1	1.57299e-06	-0.438662	0.773	0.739	0.0284381	0_injured_3day_vs_0_injured_9day	Differentiating fibroblasts
Edem21	1.58192e-06	0.265875	0.149	0.063	0.0285996	0_injured_3day_vs_0_injured_9day	Differentiating fibroblasts
Gns1	1.58193e-06	0.292917	0.348	0.219	0.0285996	0_injured_3day_vs_0_injured_9day	Differentiating fibroblasts
Armcx22	1.59548e-06	0.32556	0.271	0.15	0.0288446	0_injured_3day_vs_0_injured_9day	Differentiating fibroblasts
Hoxc101	1.70071e-06	0.371109	0.266	0.149	0.0307472	0_injured_3day_vs_0_injured_9day	Differentiating fibroblasts
Incenp1	1.72291e-06	0.343467	0.141	0.057	0.0311486	0_injured_3day_vs_0_injured_9day	Differentiating fibroblasts
Iqgap12	1.77174e-06	0.318274	0.582	0.449	0.0320314	0_injured_3day_vs_0_injured_9day	Differentiating fibroblasts
Zc3h151	1.78186e-06	0.376696	0.431	0.297	0.0322143	0_injured_3day_vs_0_injured_9day	Differentiating fibroblasts
Rbms21	1.79277e-06	0.372168	0.275	0.157	0.0324114	0_injured_3day_vs_0_injured_9day	Differentiating fibroblasts
Flna2	1.79816e-06	0.267398	0.563	0.418	0.0325089	0_injured_3day_vs_0_injured_9day	Differentiating fibroblasts
Mprip2	1.85291e-06	0.364621	0.374	0.239	0.0334987	0_injured_3day_vs_0_injured_9day	Differentiating fibroblasts
Plat2	1.89625e-06	0.489028	0.463	0.331	0.0342822	0_injured_3day_vs_0_injured_9day	Differentiating fibroblasts
Mvp1	1.94156e-06	0.31906	0.197	0.098	0.0351015	0_injured_3day_vs_0_injured_9day	Differentiating fibroblasts
Cdc201	2.12131e-06	0.343453	0.104	0.035	0.0383512	0_injured_3day_vs_0_injured_9day	Differentiating fibroblasts
Sin3b2	2.19226e-06	0.453987	0.355	0.229	0.0396338	0_injured_3day_vs_0_injured_9day	Differentiating fibroblasts
Hmgb11	2.25072e-06	0.340223	0.292	0.178	0.0406907	0_injured_3day_vs_0_injured_9day	Differentiating fibroblasts
Atp1a12	2.25535e-06	0.294961	0.329	0.203	0.0407745	0_injured_3day_vs_0_injured_9day	Differentiating fibroblasts
Ubl51	2.26878e-06	0.334675	0.515	0.389	0.0410172	0_injured_3day_vs_0_injured_9day	Differentiating fibroblasts
Krcc12	2.30562e-06	0.346847	0.413	0.274	0.0416833	0_injured_3day_vs_0_injured_9day	Differentiating fibroblasts
Tsc22d32	2.46462e-06	0.265783	0.264	0.147	0.0445579	0_injured_3day_vs_0_injured_9day	Differentiating fibroblasts
Cadm31	2.49983e-06	0.415387	0.141	0.058	0.0451944	0_injured_3day_vs_0_injured_9day	Differentiating fibroblasts
Plagl12	2.62277e-06	-0.626032	0.364	0.474	0.047417	0_injured_3day_vs_0_injured_9day	Differentiating fibroblasts
Gsn	9.47145e-31	3.72516	0.956	0.771	1.71234e-26	0_uninjured_vs_0_injured_3day	Differentiating fibroblasts
Cthrc1	2.12178e-25	-3.74827	0.044	0.79	3.83596e-21	0_uninjured_vs_0_injured_3day	Differentiating fibroblasts
Rps20	5.96219e-21	-1.84693	0.471	0.896	1.0779e-16	0_uninjured_vs_0_injured_3day	Differentiating fibroblasts
Rplp1	4.26238e-20	-1.47459	0.662	0.937	7.70596e-16	0_uninjured_vs_0_injured_3day	Differentiating fibroblasts
Mpz	9.72482e-20	1.84717	0.206	0.004	1.75815e-15	0_uninjured_vs_0_injured_3day	Differentiating fibroblasts
Eef1b2	5.58239e-19	-1.86301	0.294	0.851	1.00924e-14	0_uninjured_vs_0_injured_3day	Differentiating fibroblasts
Rpsa-ps10	1.79264e-18	-2.15735	0.176	0.766	3.24091e-14	0_uninjured_vs_0_injured_3day	Differentiating fibroblasts
Gnb2l1	2.37557e-18	-1.68841	0.382	0.868	4.29479e-14	0_uninjured_vs_0_injured_3day	Differentiating fibroblasts
Lgals1	1.23127e-17	-1.5516	0.632	0.937	2.22601e-13	0_uninjured_vs_0_injured_3day	Differentiating fibroblasts
Fstl1	1.62086e-17	-1.29006	0.721	0.959	2.93036e-13	0_uninjured_vs_0_injured_3day	Differentiating fibroblasts
Rps26	6.62978e-17	-1.64004	0.5	0.857	1.1986e-12	0_uninjured_vs_0_injured_3day	Differentiating fibroblasts
Spp1	1.69849e-16	-2.90477	0	0.58	3.0707e-12	0_uninjured_vs_0_injured_3day	Differentiating fibroblasts
Vmp1	3.28877e-16	-1.93859	0.044	0.621	5.94577e-12	0_uninjured_vs_0_injured_3day	Differentiating fibroblasts
H19	5.2593e-16	-3.34968	0.088	0.667	9.50828e-12	0_uninjured_vs_0_injured_3day	Differentiating fibroblasts
Pabpc1	6.57745e-16	-1.35982	0.574	0.926	1.18914e-11	0_uninjured_vs_0_injured_3day	Differentiating fibroblasts
Rpsa	6.69191e-16	-1.77414	0.235	0.779	1.20983e-11	0_uninjured_vs_0_injured_3day	Differentiating fibroblasts
Timp1	2.06006e-15	-2.33531	0.059	0.621	3.72438e-11	0_uninjured_vs_0_injured_3day	Differentiating fibroblasts
Malat1	6.80255e-15	1.86191	1	0.974	1.22983e-10	0_uninjured_vs_0_injured_3day	Differentiating fibroblasts
Smoc2	1.06216e-14	2.52129	0.618	0.242	1.92029e-10	0_uninjured_vs_0_injured_3day	Differentiating fibroblasts
Vim	1.57885e-14	-1.33699	0.618	0.913	2.8544e-10	0_uninjured_vs_0_injured_3day	Differentiating fibroblasts
Postn	2.34516e-14	-1.5973	0.324	0.861	4.23982e-10	0_uninjured_vs_0_injured_3day	Differentiating fibroblasts
Dcn	3.51147e-14	1.66878	0.941	0.965	6.34839e-10	0_uninjured_vs_0_injured_3day	Differentiating fibroblasts
Gm10076	4.50688e-14	-1.56634	0.324	0.784	8.14798e-10	0_uninjured_vs_0_injured_3day	Differentiating fibroblasts
Actb	5.09677e-14	-1.13998	0.824	0.937	9.21444e-10	0_uninjured_vs_0_injured_3day	Differentiating fibroblasts
Gm17541	5.93616e-14	-2.00836	0.015	0.535	1.0732e-09	0_uninjured_vs_0_injured_3day	Differentiating fibroblasts
Rps26-ps1	6.27812e-14	-1.9024	0.265	0.732	1.13502e-09	0_uninjured_vs_0_injured_3day	Differentiating fibroblasts
Tpm1	6.44356e-14	-1.84816	0.265	0.749	1.16493e-09	0_uninjured_vs_0_injured_3day	Differentiating fibroblasts
Gm10263	1.0399e-13	-1.87338	0.162	0.667	1.88004e-09	0_uninjured_vs_0_injured_3day	Differentiating fibroblasts
Rps10-ps1	1.38756e-13	-1.53549	0.206	0.727	2.50857e-09	0_uninjured_vs_0_injured_3day	Differentiating fibroblasts
Comp	2.17928e-13	2.45363	0.235	0.026	3.93993e-09	0_uninjured_vs_0_injured_3day	Differentiating fibroblasts
Rtn4	2.58439e-13	-1.50464	0.132	0.675	4.67232e-09	0_uninjured_vs_0_injured_3day	Differentiating fibroblasts
Csrp2	3.71133e-13	-2.08613	0.088	0.6	6.70971e-09	0_uninjured_vs_0_injured_3day	Differentiating fibroblasts
S100a11	5.60452e-13	-1.42199	0.397	0.814	1.01324e-08	0_uninjured_vs_0_injured_3day	Differentiating fibroblasts
Gm10275	7.42774e-13	-1.7339	0.176	0.669	1.34286e-08	0_uninjured_vs_0_injured_3day	Differentiating fibroblasts
Rps3a1	8.37957e-13	-1.4134	0.397	0.816	1.51494e-08	0_uninjured_vs_0_injured_3day	Differentiating fibroblasts
Gm10288	1.00919e-12	-1.61963	0.176	0.673	1.82451e-08	0_uninjured_vs_0_injured_3day	Differentiating fibroblasts
Rpl14	1.32046e-12	-1.27724	0.412	0.846	2.38726e-08	0_uninjured_vs_0_injured_3day	Differentiating fibroblasts
Rpl4	1.84049e-12	-1.18587	0.5	0.853	3.32742e-08	0_uninjured_vs_0_injured_3day	Differentiating fibroblasts
Rps3	2.09733e-12	-1.3239	0.441	0.829	3.79176e-08	0_uninjured_vs_0_injured_3day	Differentiating fibroblasts
Npm1	2.83934e-12	-1.74515	0.176	0.658	5.13324e-08	0_uninjured_vs_0_injured_3day	Differentiating fibroblasts
Rpl34	4.83803e-12	-1.75446	0.206	0.658	8.74667e-08	0_uninjured_vs_0_injured_3day	Differentiating fibroblasts
S100a6	7.57027e-12	-1.10039	0.691	0.95	1.36863e-07	0_uninjured_vs_0_injured_3day	Differentiating fibroblasts
Rpl32	8.03336e-12	-1.13507	0.574	0.842	1.45235e-07	0_uninjured_vs_0_injured_3day	Differentiating fibroblasts
Anxa2	1.17665e-11	-1.27482	0.471	0.857	2.12727e-07	0_uninjured_vs_0_injured_3day	Differentiating fibroblasts
Rpl41	1.40076e-11	-1.06743	0.691	0.866	2.53244e-07	0_uninjured_vs_0_injured_3day	Differentiating fibroblasts
S100a4	1.4595e-11	-1.8717	0.074	0.558	2.63863e-07	0_uninjured_vs_0_injured_3day	Differentiating fibroblasts
Mir682	1.46113e-11	-1.57961	0.074	0.537	2.64158e-07	0_uninjured_vs_0_injured_3day	Differentiating fibroblasts
Wdr89	1.58427e-11	-1.24321	0.441	0.823	2.86419e-07	0_uninjured_vs_0_injured_3day	Differentiating fibroblasts
Gdi2	1.83896e-11	-1.39971	0.074	0.558	3.32465e-07	0_uninjured_vs_0_injured_3day	Differentiating fibroblasts
Hdgf	1.86228e-11	-1.66047	0.015	0.468	3.36682e-07	0_uninjured_vs_0_injured_3day	Differentiating fibroblasts
Rps24	2.30922e-11	-1.05624	0.618	0.868	4.17483e-07	0_uninjured_vs_0_injured_3day	Differentiating fibroblasts
Rpl8	2.56649e-11	-1.17561	0.471	0.835	4.63996e-07	0_uninjured_vs_0_injured_3day	Differentiating fibroblasts
Pdia3	2.72985e-11	-1.28922	0.353	0.818	4.9353e-07	0_uninjured_vs_0_injured_3day	Differentiating fibroblasts
Rpl21-ps4	3.34314e-11	-1.67801	0.118	0.569	6.04406e-07	0_uninjured_vs_0_injured_3day	Differentiating fibroblasts
Rps21	4.1552e-11	-1.12356	0.515	0.861	7.51219e-07	0_uninjured_vs_0_injured_3day	Differentiating fibroblasts
Cfl1	4.22096e-11	-1.23312	0.191	0.658	7.63107e-07	0_uninjured_vs_0_injured_3day	Differentiating fibroblasts
Thy1	4.73273e-11	-1.09915	0.088	0.578	8.55629e-07	0_uninjured_vs_0_injured_3day	Differentiating fibroblasts
Rpl9-ps6	4.96961e-11	-1.42346	0.132	0.615	8.98457e-07	0_uninjured_vs_0_injured_3day	Differentiating fibroblasts
Gm22426	5.58539e-11	-1.3079	0.029	0.478	1.00978e-06	0_uninjured_vs_0_injured_3day	Differentiating fibroblasts
Rps15a	5.88791e-11	-1.15638	0.485	0.812	1.06447e-06	0_uninjured_vs_0_injured_3day	Differentiating fibroblasts
Rplp0	6.23608e-11	-1.28548	0.426	0.803	1.12742e-06	0_uninjured_vs_0_injured_3day	Differentiating fibroblasts
Rpl13-ps3	6.93053e-11	-1.46498	0.176	0.639	1.25297e-06	0_uninjured_vs_0_injured_3day	Differentiating fibroblasts
1500012F01Rik	8.5518e-11	-1.55834	0.074	0.535	1.54608e-06	0_uninjured_vs_0_injured_3day	Differentiating fibroblasts
Ckap4	8.7356e-11	-1.45262	0.25	0.71	1.57931e-06	0_uninjured_vs_0_injured_3day	Differentiating fibroblasts
Rpl39	9.25727e-11	-1.18187	0.529	0.823	1.67362e-06	0_uninjured_vs_0_injured_3day	Differentiating fibroblasts
Gm10073	1.12425e-10	-1.3236	0.162	0.63	2.03253e-06	0_uninjured_vs_0_injured_3day	Differentiating fibroblasts
Plac8	1.23769e-10	-1.95433	0.029	0.461	2.23761e-06	0_uninjured_vs_0_injured_3day	Differentiating fibroblasts
Fn1	1.26185e-10	-0.982987	0.603	0.944	2.28131e-06	0_uninjured_vs_0_injured_3day	Differentiating fibroblasts
Sec61b	1.48746e-10	-1.50505	0.206	0.656	2.68917e-06	0_uninjured_vs_0_injured_3day	Differentiating fibroblasts
Rps8	1.6334e-10	-1.11893	0.426	0.816	2.95302e-06	0_uninjured_vs_0_injured_3day	Differentiating fibroblasts
Rbp1	1.72695e-10	-1.37467	0.132	0.613	3.12215e-06	0_uninjured_vs_0_injured_3day	Differentiating fibroblasts
Gm6576	1.79888e-10	-1.4923	0.088	0.522	3.25219e-06	0_uninjured_vs_0_injured_3day	Differentiating fibroblasts
Gm3940	1.80207e-10	-1.52377	0.088	0.532	3.25797e-06	0_uninjured_vs_0_injured_3day	Differentiating fibroblasts
Rps4x	2.32119e-10	-1.25991	0.324	0.738	4.19648e-06	0_uninjured_vs_0_injured_3day	Differentiating fibroblasts
Ltbp4	2.39945e-10	2.29427	0.574	0.303	4.33797e-06	0_uninjured_vs_0_injured_3day	Differentiating fibroblasts
Pdia6	2.76031e-10	-1.23436	0.294	0.732	4.99037e-06	0_uninjured_vs_0_injured_3day	Differentiating fibroblasts
Ldha	2.78097e-10	-1.06065	0.118	0.58	5.02772e-06	0_uninjured_vs_0_injured_3day	Differentiating fibroblasts
Cox7b	2.84348e-10	-1.15228	0.176	0.645	5.14073e-06	0_uninjured_vs_0_injured_3day	Differentiating fibroblasts
Loxl2	3.01769e-10	-1.39279	0.279	0.734	5.45568e-06	0_uninjured_vs_0_injured_3day	Differentiating fibroblasts
Prdx5	3.17039e-10	-1.44368	0.147	0.584	5.73175e-06	0_uninjured_vs_0_injured_3day	Differentiating fibroblasts
Rpl13a-ps1	3.19839e-10	-1.53607	0.088	0.511	5.78237e-06	0_uninjured_vs_0_injured_3day	Differentiating fibroblasts
Mir692-1	3.4019e-10	-1.25097	0.044	0.472	6.1503e-06	0_uninjured_vs_0_injured_3day	Differentiating fibroblasts
Rps10	3.70871e-10	-1.15455	0.412	0.805	6.70498e-06	0_uninjured_vs_0_injured_3day	Differentiating fibroblasts
Hmgn1	3.97916e-10	-1.18254	0.162	0.626	7.19392e-06	0_uninjured_vs_0_injured_3day	Differentiating fibroblasts
Rpl27a	4.03158e-10	-1.35927	0.147	0.589	7.2887e-06	0_uninjured_vs_0_injured_3day	Differentiating fibroblasts
2011-09-01	4.03299e-10	-1.41323	0.132	0.595	7.29124e-06	0_uninjured_vs_0_injured_3day	Differentiating fibroblasts
Prdx2	4.66244e-10	-1.12104	0.147	0.582	8.42922e-06	0_uninjured_vs_0_injured_3day	Differentiating fibroblasts
Tmsb10	5.42434e-10	-1.18371	0.441	0.794	9.80666e-06	0_uninjured_vs_0_injured_3day	Differentiating fibroblasts
Rps3a3	5.75543e-10	-1.19307	0.235	0.712	1.04052e-05	0_uninjured_vs_0_injured_3day	Differentiating fibroblasts
Sox4	6.23801e-10	-1.86454	0.044	0.442	1.12777e-05	0_uninjured_vs_0_injured_3day	Differentiating fibroblasts
Pdap1	6.42519e-10	-1.47693	0.162	0.595	1.16161e-05	0_uninjured_vs_0_injured_3day	Differentiating fibroblasts
Tnc	9.65686e-10	-2.73583	0.059	0.457	1.74586e-05	0_uninjured_vs_0_injured_3day	Differentiating fibroblasts
Gm22761	9.80214e-10	-1.21911	0.029	0.442	1.77213e-05	0_uninjured_vs_0_injured_3day	Differentiating fibroblasts
Gm17430	9.81471e-10	-1.31982	0.015	0.411	1.7744e-05	0_uninjured_vs_0_injured_3day	Differentiating fibroblasts
Gm6472	9.98047e-10	-1.40879	0.147	0.58	1.80437e-05	0_uninjured_vs_0_injured_3day	Differentiating fibroblasts
Gm5244	1.03924e-09	-0.99836	0.015	0.416	1.87883e-05	0_uninjured_vs_0_injured_3day	Differentiating fibroblasts
Surf4	1.22882e-09	-1.22213	0.147	0.589	2.22159e-05	0_uninjured_vs_0_injured_3day	Differentiating fibroblasts
Cyb5r3	1.27291e-09	-1.13756	0.162	0.628	2.30129e-05	0_uninjured_vs_0_injured_3day	Differentiating fibroblasts
Tubb5	1.473e-09	-1.15785	0.176	0.623	2.66305e-05	0_uninjured_vs_0_injured_3day	Differentiating fibroblasts
Lox	1.48484e-09	-1.11433	0.309	0.781	2.68445e-05	0_uninjured_vs_0_injured_3day	Differentiating fibroblasts
Abca8a	1.78941e-09	2.19153	0.544	0.281	3.23508e-05	0_uninjured_vs_0_injured_3day	Differentiating fibroblasts
Lyz2	2.11847e-09	-1.33211	0.015	0.394	3.82997e-05	0_uninjured_vs_0_injured_3day	Differentiating fibroblasts
Mlec	2.24248e-09	-1.01397	0.074	0.494	4.05419e-05	0_uninjured_vs_0_injured_3day	Differentiating fibroblasts
Maged1	2.3033e-09	-0.878824	0.206	0.662	4.16413e-05	0_uninjured_vs_0_injured_3day	Differentiating fibroblasts
Hif1a	2.46324e-09	-1.50728	0.103	0.504	4.45329e-05	0_uninjured_vs_0_injured_3day	Differentiating fibroblasts
Rpl22	2.5931e-09	-1.06177	0.441	0.803	4.68807e-05	0_uninjured_vs_0_injured_3day	Differentiating fibroblasts
Vcan	3.60897e-09	-1.13125	0.221	0.673	6.52466e-05	0_uninjured_vs_0_injured_3day	Differentiating fibroblasts
Rpl35a	3.6965e-09	-1.2388	0.147	0.574	6.68289e-05	0_uninjured_vs_0_injured_3day	Differentiating fibroblasts
Gm8444	3.70022e-09	-1.27393	0.088	0.504	6.68962e-05	0_uninjured_vs_0_injured_3day	Differentiating fibroblasts
Eif5a	3.8881e-09	-1.31903	0.176	0.584	7.02929e-05	0_uninjured_vs_0_injured_3day	Differentiating fibroblasts
Eif5b	3.98585e-09	-0.867003	0.206	0.649	7.20602e-05	0_uninjured_vs_0_injured_3day	Differentiating fibroblasts
Rps25	4.2617e-09	-1.19527	0.191	0.619	7.70473e-05	0_uninjured_vs_0_injured_3day	Differentiating fibroblasts
Stat3	4.38194e-09	-0.81436	0.059	0.476	7.92212e-05	0_uninjured_vs_0_injured_3day	Differentiating fibroblasts
Copb2	4.50433e-09	-1.15488	0.118	0.53	8.14339e-05	0_uninjured_vs_0_injured_3day	Differentiating fibroblasts
Ncl	4.50763e-09	-0.632362	0.294	0.777	8.14934e-05	0_uninjured_vs_0_injured_3day	Differentiating fibroblasts
Actn1	4.62695e-09	-1.13049	0.147	0.569	8.36506e-05	0_uninjured_vs_0_injured_3day	Differentiating fibroblasts
Mmp14	5.00351e-09	-0.939341	0.324	0.779	9.04585e-05	0_uninjured_vs_0_injured_3day	Differentiating fibroblasts
Hsp90ab1	5.29827e-09	-0.850955	0.544	0.887	9.57874e-05	0_uninjured_vs_0_injured_3day	Differentiating fibroblasts
Sh3bgrl3	5.32092e-09	-1.32577	0.206	0.621	9.61969e-05	0_uninjured_vs_0_injured_3day	Differentiating fibroblasts
Myh9	5.54408e-09	-0.848286	0.088	0.513	0.000100232	0_uninjured_vs_0_injured_3day	Differentiating fibroblasts
Rpl18	6.01439e-09	-0.974363	0.279	0.686	0.000108734	0_uninjured_vs_0_injured_3day	Differentiating fibroblasts
Cnn3	6.14319e-09	-1.17698	0.132	0.55	0.000111063	0_uninjured_vs_0_injured_3day	Differentiating fibroblasts
Ccl2	6.43631e-09	-1.92617	0.029	0.405	0.000116362	0_uninjured_vs_0_injured_3day	Differentiating fibroblasts
2010107E04Rik	6.46531e-09	-0.68171	0.191	0.632	0.000116886	0_uninjured_vs_0_injured_3day	Differentiating fibroblasts
Cd44	7.73268e-09	-1.38519	0.103	0.509	0.000139799	0_uninjured_vs_0_injured_3day	Differentiating fibroblasts
Flna	7.77883e-09	-0.586109	0.132	0.563	0.000140634	0_uninjured_vs_0_injured_3day	Differentiating fibroblasts
Rps14	8.34073e-09	-0.912802	0.544	0.855	0.000150792	0_uninjured_vs_0_injured_3day	Differentiating fibroblasts
RP23-103I12.13	8.45624e-09	-1.32562	0.206	0.636	0.00015288	0_uninjured_vs_0_injured_3day	Differentiating fibroblasts
Cald1	8.48114e-09	-1.01431	0.412	0.816	0.00015333	0_uninjured_vs_0_injured_3day	Differentiating fibroblasts
Rps9	8.54458e-09	-0.891718	0.529	0.861	0.000154477	0_uninjured_vs_0_injured_3day	Differentiating fibroblasts
Rps3a2	8.78454e-09	-1.22977	0.015	0.379	0.000158816	0_uninjured_vs_0_injured_3day	Differentiating fibroblasts
Ndufb9	9.3265e-09	-1.29693	0.088	0.478	0.000168614	0_uninjured_vs_0_injured_3day	Differentiating fibroblasts
Igfbp3	9.48668e-09	-1.36458	0.103	0.515	0.00017151	0_uninjured_vs_0_injured_3day	Differentiating fibroblasts
Cox4i1	9.84792e-09	-0.911688	0.412	0.82	0.000178041	0_uninjured_vs_0_injured_3day	Differentiating fibroblasts
Gm17511	1.31165e-08	-1.22931	0.029	0.385	0.000237134	0_uninjured_vs_0_injured_3day	Differentiating fibroblasts
Psmb1	1.4638e-08	-1.02184	0.176	0.61	0.00026464	0_uninjured_vs_0_injured_3day	Differentiating fibroblasts
Lgmn	1.58629e-08	-0.834942	0.074	0.483	0.000286785	0_uninjured_vs_0_injured_3day	Differentiating fibroblasts
Cox6a1	1.66178e-08	-1.14358	0.25	0.68	0.000300433	0_uninjured_vs_0_injured_3day	Differentiating fibroblasts
Serbp1	1.71838e-08	-0.652165	0.279	0.742	0.000310666	0_uninjured_vs_0_injured_3day	Differentiating fibroblasts
Myoc	1.77426e-08	1.86706	0.162	0.022	0.000320768	0_uninjured_vs_0_injured_3day	Differentiating fibroblasts
Rplp2	1.79936e-08	-0.902909	0.529	0.842	0.000325307	0_uninjured_vs_0_injured_3day	Differentiating fibroblasts
Rpl13a	1.85448e-08	-0.851136	0.618	0.864	0.000335271	0_uninjured_vs_0_injured_3day	Differentiating fibroblasts
Gm10320	1.96306e-08	-1.26044	0.191	0.593	0.000354902	0_uninjured_vs_0_injured_3day	Differentiating fibroblasts
Pdlim7	2.07279e-08	-0.463115	0.059	0.431	0.00037474	0_uninjured_vs_0_injured_3day	Differentiating fibroblasts
D17Wsu104e	2.26789e-08	-1.14592	0.059	0.433	0.000410012	0_uninjured_vs_0_injured_3day	Differentiating fibroblasts
Mif	2.2683e-08	-1.38968	0.088	0.459	0.000410086	0_uninjured_vs_0_injured_3day	Differentiating fibroblasts
Wbp5	2.34672e-08	-1.14089	0.25	0.662	0.000424264	0_uninjured_vs_0_injured_3day	Differentiating fibroblasts
mt-Rnr2	2.44643e-08	0.810356	0.985	0.965	0.00044229	0_uninjured_vs_0_injured_3day	Differentiating fibroblasts
Canx	2.51319e-08	-0.971413	0.338	0.736	0.000454359	0_uninjured_vs_0_injured_3day	Differentiating fibroblasts
Rpl23	2.56904e-08	-0.911096	0.382	0.777	0.000464456	0_uninjured_vs_0_injured_3day	Differentiating fibroblasts
Rps11	2.59966e-08	-0.976328	0.294	0.732	0.000469993	0_uninjured_vs_0_injured_3day	Differentiating fibroblasts
Lrrc58	2.73523e-08	-1.08481	0.294	0.69	0.000494502	0_uninjured_vs_0_injured_3day	Differentiating fibroblasts
P4hb	2.73786e-08	-1.01605	0.382	0.803	0.000494978	0_uninjured_vs_0_injured_3day	Differentiating fibroblasts
Psmc1	2.84404e-08	-0.536461	0.059	0.439	0.000514175	0_uninjured_vs_0_injured_3day	Differentiating fibroblasts
Eef1a1	2.87275e-08	-0.929189	0.412	0.777	0.000519365	0_uninjured_vs_0_injured_3day	Differentiating fibroblasts
Capzb	2.98689e-08	-0.759314	0.147	0.552	0.000539999	0_uninjured_vs_0_injured_3day	Differentiating fibroblasts
Swi5	3.09964e-08	-0.981593	0.235	0.652	0.000560385	0_uninjured_vs_0_injured_3day	Differentiating fibroblasts
Lmna	3.23468e-08	-0.835761	0.294	0.708	0.000584798	0_uninjured_vs_0_injured_3day	Differentiating fibroblasts
Naca	3.76396e-08	-1.14859	0.176	0.556	0.000680486	0_uninjured_vs_0_injured_3day	Differentiating fibroblasts
Mtch1	4.03344e-08	-0.964969	0.162	0.558	0.000729206	0_uninjured_vs_0_injured_3day	Differentiating fibroblasts
Gm2000	4.0481e-08	-0.941158	0.118	0.535	0.000731856	0_uninjured_vs_0_injured_3day	Differentiating fibroblasts
Cox14	5.37036e-08	-1.10633	0.059	0.411	0.000970908	0_uninjured_vs_0_injured_3day	Differentiating fibroblasts
Serf1	5.81309e-08	-1.24896	0.044	0.39	0.00105095	0_uninjured_vs_0_injured_3day	Differentiating fibroblasts
Gpx7	5.91907e-08	-0.909462	0.118	0.509	0.00107011	0_uninjured_vs_0_injured_3day	Differentiating fibroblasts
Thbs2	5.94042e-08	-0.740389	0.279	0.708	0.00107397	0_uninjured_vs_0_injured_3day	Differentiating fibroblasts
Grb10	5.96472e-08	-1.151	0.279	0.658	0.00107836	0_uninjured_vs_0_injured_3day	Differentiating fibroblasts
Ywhae	6.07782e-08	-0.764449	0.265	0.654	0.00109881	0_uninjured_vs_0_injured_3day	Differentiating fibroblasts
Sfr1	6.12498e-08	-0.985057	0.221	0.654	0.00110733	0_uninjured_vs_0_injured_3day	Differentiating fibroblasts
Gm4204	6.3116e-08	-0.93642	0.147	0.535	0.00114107	0_uninjured_vs_0_injured_3day	Differentiating fibroblasts
Chd3	6.34529e-08	-0.944029	0.132	0.528	0.00114716	0_uninjured_vs_0_injured_3day	Differentiating fibroblasts
Ext1	6.54502e-08	-1.1837	0.044	0.4	0.00118327	0_uninjured_vs_0_injured_3day	Differentiating fibroblasts
Fam162a	6.86582e-08	-1.29582	0.029	0.364	0.00124127	0_uninjured_vs_0_injured_3day	Differentiating fibroblasts
Gm8730	6.93529e-08	-1.19892	0.132	0.517	0.00125383	0_uninjured_vs_0_injured_3day	Differentiating fibroblasts
Calm1	7.10688e-08	-0.931515	0.515	0.831	0.00128485	0_uninjured_vs_0_injured_3day	Differentiating fibroblasts
Hnrnpa0	7.16201e-08	-0.868091	0.103	0.487	0.00129482	0_uninjured_vs_0_injured_3day	Differentiating fibroblasts
Ap2s1	7.37668e-08	-1.10752	0.044	0.385	0.00133363	0_uninjured_vs_0_injured_3day	Differentiating fibroblasts
Rrbp1	7.45643e-08	-0.779838	0.559	0.879	0.00134805	0_uninjured_vs_0_injured_3day	Differentiating fibroblasts
Mfap5	7.80941e-08	-0.689191	0.397	0.801	0.00141186	0_uninjured_vs_0_injured_3day	Differentiating fibroblasts
Pkm	8.32403e-08	-0.776768	0.162	0.565	0.0015049	0_uninjured_vs_0_injured_3day	Differentiating fibroblasts
2410006H16Rik	8.4411e-08	-1.09688	0.132	0.519	0.00152607	0_uninjured_vs_0_injured_3day	Differentiating fibroblasts
Cdk4	9.60539e-08	-1.15294	0.147	0.509	0.00173656	0_uninjured_vs_0_injured_3day	Differentiating fibroblasts
Metap2	9.68504e-08	-1.12575	0.147	0.539	0.00175096	0_uninjured_vs_0_injured_3day	Differentiating fibroblasts
Cpxm2	9.75509e-08	1.45564	0.176	0.03	0.00176362	0_uninjured_vs_0_injured_3day	Differentiating fibroblasts
Plagl1	9.75728e-08	-1.64726	0.029	0.364	0.00176402	0_uninjured_vs_0_injured_3day	Differentiating fibroblasts
Dap	1.00556e-07	-1.04595	0.132	0.519	0.00181795	0_uninjured_vs_0_injured_3day	Differentiating fibroblasts
Vit	1.05243e-07	1.58593	0.279	0.082	0.00190269	0_uninjured_vs_0_injured_3day	Differentiating fibroblasts
Fbn1	1.15588e-07	-0.816322	0.544	0.881	0.00208971	0_uninjured_vs_0_injured_3day	Differentiating fibroblasts
Iqgap1	1.18445e-07	-0.762798	0.176	0.582	0.00214136	0_uninjured_vs_0_injured_3day	Differentiating fibroblasts
Uqcrh	1.22762e-07	-0.833066	0.221	0.621	0.00221941	0_uninjured_vs_0_injured_3day	Differentiating fibroblasts
Tmem167	1.29097e-07	-0.954968	0.147	0.535	0.00233395	0_uninjured_vs_0_injured_3day	Differentiating fibroblasts
2410015M20Rik	1.36014e-07	-0.92011	0.029	0.355	0.00245899	0_uninjured_vs_0_injured_3day	Differentiating fibroblasts
Serf2	1.39484e-07	-0.565988	0.265	0.66	0.00252172	0_uninjured_vs_0_injured_3day	Differentiating fibroblasts
Kdelr2	1.42144e-07	-0.906224	0.235	0.649	0.00256983	0_uninjured_vs_0_injured_3day	Differentiating fibroblasts
Enpp2	1.46446e-07	1.86095	0.309	0.1	0.0026476	0_uninjured_vs_0_injured_3day	Differentiating fibroblasts
Calr	1.54316e-07	-0.95989	0.471	0.825	0.00278987	0_uninjured_vs_0_injured_3day	Differentiating fibroblasts
Rps28	1.62266e-07	-0.880177	0.294	0.693	0.00293361	0_uninjured_vs_0_injured_3day	Differentiating fibroblasts
Rps19	1.66066e-07	-1.07382	0.456	0.771	0.00300231	0_uninjured_vs_0_injured_3day	Differentiating fibroblasts
Dpysl3	1.73291e-07	-0.809144	0.235	0.662	0.00313293	0_uninjured_vs_0_injured_3day	Differentiating fibroblasts
Nme1	1.80096e-07	-1.07213	0.103	0.468	0.00325596	0_uninjured_vs_0_injured_3day	Differentiating fibroblasts
Tpm3-rs7	1.83147e-07	-1.08159	0.118	0.472	0.00331112	0_uninjured_vs_0_injured_3day	Differentiating fibroblasts
Snx5	1.84393e-07	-1.07754	0.044	0.377	0.00333365	0_uninjured_vs_0_injured_3day	Differentiating fibroblasts
Atp5e	1.88358e-07	-0.924064	0.279	0.697	0.00340532	0_uninjured_vs_0_injured_3day	Differentiating fibroblasts
Cenpq	1.92576e-07	-1.11175	0.059	0.398	0.00348158	0_uninjured_vs_0_injured_3day	Differentiating fibroblasts
Efemp2	2.10476e-07	-0.969217	0.176	0.571	0.00380519	0_uninjured_vs_0_injured_3day	Differentiating fibroblasts
Wdr26	2.37999e-07	-0.423452	0.074	0.444	0.00430278	0_uninjured_vs_0_injured_3day	Differentiating fibroblasts
Krtcap2	2.44045e-07	-0.856589	0.206	0.619	0.00441209	0_uninjured_vs_0_injured_3day	Differentiating fibroblasts
mt-Nd1	2.45492e-07	0.982939	0.868	0.792	0.00443825	0_uninjured_vs_0_injured_3day	Differentiating fibroblasts
Rexo2	2.59116e-07	-0.863079	0.118	0.47	0.00468455	0_uninjured_vs_0_injured_3day	Differentiating fibroblasts
Rcn1	2.62368e-07	-0.799291	0.265	0.669	0.00474335	0_uninjured_vs_0_injured_3day	Differentiating fibroblasts
Eif3a	2.66543e-07	-0.611151	0.265	0.667	0.00481882	0_uninjured_vs_0_injured_3day	Differentiating fibroblasts
Cstb	2.73073e-07	-0.892644	0.147	0.515	0.00493688	0_uninjured_vs_0_injured_3day	Differentiating fibroblasts
Ifitm3	2.8072e-07	-0.960647	0.456	0.816	0.00507514	0_uninjured_vs_0_injured_3day	Differentiating fibroblasts
C7	2.85241e-07	0.933495	0.103	0.009	0.00515688	0_uninjured_vs_0_injured_3day	Differentiating fibroblasts
Adam12	2.85492e-07	-1.10435	0	0.297	0.00516141	0_uninjured_vs_0_injured_3day	Differentiating fibroblasts
Lgals3	2.95735e-07	-1.04263	0.088	0.448	0.0053466	0_uninjured_vs_0_injured_3day	Differentiating fibroblasts
Rhoc	3.0434e-07	-0.50212	0.176	0.582	0.00550216	0_uninjured_vs_0_injured_3day	Differentiating fibroblasts
Tgfbr2	3.12285e-07	-1.01661	0.132	0.485	0.00564579	0_uninjured_vs_0_injured_3day	Differentiating fibroblasts
Palld	3.24176e-07	-1.22906	0.059	0.383	0.00586077	0_uninjured_vs_0_injured_3day	Differentiating fibroblasts
Minos1	3.45321e-07	-1.01713	0.25	0.606	0.00624305	0_uninjured_vs_0_injured_3day	Differentiating fibroblasts
Arf4	3.49716e-07	-0.916427	0.279	0.675	0.00632251	0_uninjured_vs_0_injured_3day	Differentiating fibroblasts
Sh3glb1	3.54065e-07	-1.057	0.147	0.513	0.00640113	0_uninjured_vs_0_injured_3day	Differentiating fibroblasts
Ndufa4	3.72154e-07	-0.951016	0.294	0.669	0.00672818	0_uninjured_vs_0_injured_3day	Differentiating fibroblasts
Atp5g3	3.72649e-07	-0.913959	0.235	0.613	0.00673713	0_uninjured_vs_0_injured_3day	Differentiating fibroblasts
Arpc1a	3.75073e-07	-0.825311	0.044	0.366	0.00678095	0_uninjured_vs_0_injured_3day	Differentiating fibroblasts
Col12a1	3.91578e-07	-1.25725	0.132	0.504	0.00707934	0_uninjured_vs_0_injured_3day	Differentiating fibroblasts
Tceal8	4.03582e-07	-0.845637	0.132	0.494	0.00729635	0_uninjured_vs_0_injured_3day	Differentiating fibroblasts
Lrrc17	4.24098e-07	-0.739107	0.118	0.509	0.00766727	0_uninjured_vs_0_injured_3day	Differentiating fibroblasts
Pdia4	4.36421e-07	-0.97824	0.132	0.485	0.00789005	0_uninjured_vs_0_injured_3day	Differentiating fibroblasts
Gm10269	4.5905e-07	-0.944381	0.235	0.619	0.00829917	0_uninjured_vs_0_injured_3day	Differentiating fibroblasts
Angptl4	4.78123e-07	-1.1358	0.088	0.42	0.00864399	0_uninjured_vs_0_injured_3day	Differentiating fibroblasts
Rtf1	5.28728e-07	-1.00172	0.088	0.439	0.00955887	0_uninjured_vs_0_injured_3day	Differentiating fibroblasts
Uqcr11	5.51401e-07	-0.767469	0.162	0.519	0.00996878	0_uninjured_vs_0_injured_3day	Differentiating fibroblasts
Copz2	5.64834e-07	-0.797463	0.118	0.472	0.0102116	0_uninjured_vs_0_injured_3day	Differentiating fibroblasts
Eif3l	5.67116e-07	-1.05295	0.029	0.327	0.0102529	0_uninjured_vs_0_injured_3day	Differentiating fibroblasts
Hnrnpm	5.70666e-07	-0.670335	0.235	0.639	0.0103171	0_uninjured_vs_0_injured_3day	Differentiating fibroblasts
Calm3	5.71978e-07	-0.414853	0.147	0.53	0.0103408	0_uninjured_vs_0_injured_3day	Differentiating fibroblasts
Eif3f	5.76007e-07	-0.723096	0.191	0.589	0.0104136	0_uninjured_vs_0_injured_3day	Differentiating fibroblasts
Cox6b1	5.78235e-07	-0.776271	0.221	0.608	0.0104539	0_uninjured_vs_0_injured_3day	Differentiating fibroblasts
Txn1	6.06093e-07	-0.898455	0.338	0.714	0.0109576	0_uninjured_vs_0_injured_3day	Differentiating fibroblasts
Gm9843	6.25434e-07	-0.824231	0.382	0.742	0.0113072	0_uninjured_vs_0_injured_3day	Differentiating fibroblasts
Sec11a	6.52967e-07	-0.774556	0.074	0.409	0.011805	0_uninjured_vs_0_injured_3day	Differentiating fibroblasts
Trim28	6.64098e-07	-0.989479	0.015	0.31	0.0120062	0_uninjured_vs_0_injured_3day	Differentiating fibroblasts
Eef1g	6.90711e-07	-0.859746	0.25	0.613	0.0124874	0_uninjured_vs_0_injured_3day	Differentiating fibroblasts
Gabarap	6.95358e-07	-0.853903	0.294	0.677	0.0125714	0_uninjured_vs_0_injured_3day	Differentiating fibroblasts
Ufm1	6.98253e-07	-0.864254	0.059	0.392	0.0126237	0_uninjured_vs_0_injured_3day	Differentiating fibroblasts
Fscn1	7.18137e-07	-0.856387	0.088	0.418	0.0129832	0_uninjured_vs_0_injured_3day	Differentiating fibroblasts
2015-09-01	7.92972e-07	-0.732073	0.324	0.706	0.0143361	0_uninjured_vs_0_injured_3day	Differentiating fibroblasts
Vdac2	8.01676e-07	-0.950592	0.044	0.346	0.0144935	0_uninjured_vs_0_injured_3day	Differentiating fibroblasts
Khdrbs1	8.11049e-07	-0.729859	0.088	0.431	0.0146629	0_uninjured_vs_0_injured_3day	Differentiating fibroblasts
Orc5	8.29793e-07	-0.981094	0.118	0.465	0.0150018	0_uninjured_vs_0_injured_3day	Differentiating fibroblasts
Gas5	8.38844e-07	-0.856999	0.426	0.794	0.0151655	0_uninjured_vs_0_injured_3day	Differentiating fibroblasts
Serpine1	8.54828e-07	-1.31698	0.044	0.353	0.0154544	0_uninjured_vs_0_injured_3day	Differentiating fibroblasts
Acadl	8.83515e-07	-1.06113	0	0.277	0.0159731	0_uninjured_vs_0_injured_3day	Differentiating fibroblasts
Igfbp4	9.73963e-07	-0.694077	0.456	0.82	0.0176083	0_uninjured_vs_0_injured_3day	Differentiating fibroblasts
Sh3bgrl	9.7706e-07	-0.610495	0.162	0.528	0.0176643	0_uninjured_vs_0_injured_3day	Differentiating fibroblasts
Romo1	9.96386e-07	-0.765165	0.147	0.491	0.0180137	0_uninjured_vs_0_injured_3day	Differentiating fibroblasts
Sod1	9.96704e-07	-0.912653	0.191	0.571	0.0180194	0_uninjured_vs_0_injured_3day	Differentiating fibroblasts
Tpm2	1.00441e-06	-0.887279	0.088	0.42	0.0181588	0_uninjured_vs_0_injured_3day	Differentiating fibroblasts
Pros1	1.05117e-06	-0.534274	0.044	0.364	0.0190041	0_uninjured_vs_0_injured_3day	Differentiating fibroblasts
Rpl6	1.05339e-06	-0.946891	0.25	0.61	0.0190442	0_uninjured_vs_0_injured_3day	Differentiating fibroblasts
Cox5a	1.06557e-06	-0.980365	0.074	0.39	0.0192644	0_uninjured_vs_0_injured_3day	Differentiating fibroblasts
Eef2	1.06708e-06	-0.743553	0.412	0.76	0.0192918	0_uninjured_vs_0_injured_3day	Differentiating fibroblasts
Col14a1	1.12966e-06	-0.521703	0.353	0.792	0.0204231	0_uninjured_vs_0_injured_3day	Differentiating fibroblasts
Rer1	1.16576e-06	-0.799862	0.088	0.422	0.0210758	0_uninjured_vs_0_injured_3day	Differentiating fibroblasts
Timm13	1.18739e-06	-1.07762	0.103	0.426	0.0214668	0_uninjured_vs_0_injured_3day	Differentiating fibroblasts
Tnfaip6	1.21431e-06	-1.4181	0.059	0.364	0.0219535	0_uninjured_vs_0_injured_3day	Differentiating fibroblasts
Nedd8	1.24607e-06	-0.825159	0.176	0.522	0.0225277	0_uninjured_vs_0_injured_3day	Differentiating fibroblasts
Psma7	1.26326e-06	-0.546447	0.265	0.647	0.0228386	0_uninjured_vs_0_injured_3day	Differentiating fibroblasts
Gm24951	1.27767e-06	-0.89896	0	0.271	0.0230991	0_uninjured_vs_0_injured_3day	Differentiating fibroblasts
Lamtor4	1.27767e-06	-0.959451	0	0.271	0.0230991	0_uninjured_vs_0_injured_3day	Differentiating fibroblasts
Caprin1	1.30672e-06	-1.0086	0.059	0.37	0.0236241	0_uninjured_vs_0_injured_3day	Differentiating fibroblasts
Tubb2a	1.31611e-06	-1.00234	0.088	0.407	0.023794	0_uninjured_vs_0_injured_3day	Differentiating fibroblasts
Slc25a4	1.34698e-06	-0.731343	0.382	0.738	0.0243521	0_uninjured_vs_0_injured_3day	Differentiating fibroblasts
Igf1	1.40058e-06	-0.849394	0.412	0.742	0.0253212	0_uninjured_vs_0_injured_3day	Differentiating fibroblasts
Gm10260	1.40785e-06	-0.776353	0.382	0.71	0.0254525	0_uninjured_vs_0_injured_3day	Differentiating fibroblasts
Cdc42	1.4109e-06	-0.976128	0.294	0.639	0.0255076	0_uninjured_vs_0_injured_3day	Differentiating fibroblasts
Gm24098	1.44364e-06	-0.896698	0	0.268	0.0260996	0_uninjured_vs_0_injured_3day	Differentiating fibroblasts
Gm8186	1.48884e-06	-0.648602	0.059	0.366	0.0269168	0_uninjured_vs_0_injured_3day	Differentiating fibroblasts
Hsp90b1	1.52617e-06	-0.759237	0.662	0.894	0.0275915	0_uninjured_vs_0_injured_3day	Differentiating fibroblasts
Atp5k	1.53177e-06	-0.934019	0.162	0.506	0.0276928	0_uninjured_vs_0_injured_3day	Differentiating fibroblasts
Ccar1	1.55157e-06	-0.474657	0.176	0.535	0.0280508	0_uninjured_vs_0_injured_3day	Differentiating fibroblasts
Gm6133	1.56027e-06	-0.821115	0.015	0.29	0.0282081	0_uninjured_vs_0_injured_3day	Differentiating fibroblasts
Arpc4	1.60647e-06	-0.500659	0.074	0.409	0.0290433	0_uninjured_vs_0_injured_3day	Differentiating fibroblasts
Ergic1	1.65787e-06	-0.610528	0.029	0.314	0.0299727	0_uninjured_vs_0_injured_3day	Differentiating fibroblasts
Rpl10-ps3	1.70087e-06	-0.983436	0.059	0.355	0.03075	0_uninjured_vs_0_injured_3day	Differentiating fibroblasts
Spcs1	1.70385e-06	-0.904921	0.147	0.496	0.030804	0_uninjured_vs_0_injured_3day	Differentiating fibroblasts
Nsg1	1.70395e-06	-0.976889	0.044	0.348	0.0308057	0_uninjured_vs_0_injured_3day	Differentiating fibroblasts
Rpl31	1.70976e-06	-1.04614	0.162	0.496	0.0309107	0_uninjured_vs_0_injured_3day	Differentiating fibroblasts
Anp32b	1.817e-06	-0.66027	0.235	0.615	0.0328495	0_uninjured_vs_0_injured_3day	Differentiating fibroblasts
Bag1	1.81951e-06	-1.0893	0.162	0.491	0.0328949	0_uninjured_vs_0_injured_3day	Differentiating fibroblasts
Spag7	1.84077e-06	-0.87382	0	0.264	0.0332792	0_uninjured_vs_0_injured_3day	Differentiating fibroblasts
Basp1	1.87199e-06	-0.859589	0.029	0.32	0.0338437	0_uninjured_vs_0_injured_3day	Differentiating fibroblasts
Rpl36al	1.95714e-06	-0.48202	0.221	0.591	0.0353831	0_uninjured_vs_0_injured_3day	Differentiating fibroblasts
Ndufv3	1.96205e-06	-0.870853	0.118	0.442	0.035472	0_uninjured_vs_0_injured_3day	Differentiating fibroblasts
Ndufa11	2.00463e-06	-0.681537	0.103	0.442	0.0362416	0_uninjured_vs_0_injured_3day	Differentiating fibroblasts
Smc4	2.01213e-06	-0.798647	0.103	0.435	0.0363773	0_uninjured_vs_0_injured_3day	Differentiating fibroblasts
Colgalt1	2.11088e-06	-0.788915	0.103	0.426	0.0381627	0_uninjured_vs_0_injured_3day	Differentiating fibroblasts
Wls	2.13354e-06	-0.702664	0.147	0.5	0.0385722	0_uninjured_vs_0_injured_3day	Differentiating fibroblasts
2810428I15Rik	2.15411e-06	-0.858972	0.088	0.403	0.0389441	0_uninjured_vs_0_injured_3day	Differentiating fibroblasts
Ndufb7	2.15941e-06	-0.840235	0.103	0.433	0.03904	0_uninjured_vs_0_injured_3day	Differentiating fibroblasts
Pofut2	2.18399e-06	-0.818507	0.074	0.39	0.0394844	0_uninjured_vs_0_injured_3day	Differentiating fibroblasts
Parva	2.21812e-06	-0.776694	0.074	0.385	0.0401014	0_uninjured_vs_0_injured_3day	Differentiating fibroblasts
Gm5160	2.26964e-06	-1.01489	0.059	0.359	0.0410328	0_uninjured_vs_0_injured_3day	Differentiating fibroblasts
Vasp	2.29345e-06	-0.584472	0.029	0.32	0.0414634	0_uninjured_vs_0_injured_3day	Differentiating fibroblasts
Hspd1	2.29735e-06	-0.785569	0.044	0.346	0.0415338	0_uninjured_vs_0_injured_3day	Differentiating fibroblasts
Adam9	2.39574e-06	-0.627204	0.088	0.405	0.0433126	0_uninjured_vs_0_injured_3day	Differentiating fibroblasts
Gm4968	2.39785e-06	-0.912425	0.029	0.316	0.0433506	0_uninjured_vs_0_injured_3day	Differentiating fibroblasts
Ttc3	2.39806e-06	-0.586433	0.191	0.554	0.0433545	0_uninjured_vs_0_injured_3day	Differentiating fibroblasts
1110038B12Rik	2.42463e-06	-0.870709	0.044	0.327	0.0438348	0_uninjured_vs_0_injured_3day	Differentiating fibroblasts
Ndufa2	2.43462e-06	-0.875778	0.279	0.623	0.0440156	0_uninjured_vs_0_injured_3day	Differentiating fibroblasts
Tpt1	2.62289e-06	-0.71363	0.162	0.511	0.0474192	0_uninjured_vs_0_injured_3day	Differentiating fibroblasts
Sgta	2.64225e-06	-0.830067	0	0.258	0.0477691	0_uninjured_vs_0_injured_3day	Differentiating fibroblasts
Psma4	2.69249e-06	-0.497815	0.118	0.446	0.0486774	0_uninjured_vs_0_injured_3day	Differentiating fibroblasts
Cnbp	2.74994e-06	-0.329751	0.147	0.513	0.0497161	0_uninjured_vs_0_injured_3day	Differentiating fibroblasts
Atp5o	2.75349e-06	-0.926489	0.162	0.5	0.0497803	0_uninjured_vs_0_injured_3day	Differentiating fibroblasts
Gsn1	5.75749e-38	4.76283	0.956	0.547	1.0409e-33	0_uninjured_vs_0_injured_9day	Differentiating fibroblasts
Vit1	5.11966e-28	1.87373	0.279	0.015	9.25584e-24	0_uninjured_vs_0_injured_9day	Differentiating fibroblasts
Enpp21	5.82595e-28	2.44833	0.309	0.02	1.05327e-23	0_uninjured_vs_0_injured_9day	Differentiating fibroblasts
Postn1	1.6707e-25	-2.52346	0.324	0.923	3.02046e-21	0_uninjured_vs_0_injured_9day	Differentiating fibroblasts
Comp1	4.49945e-24	2.72794	0.235	0.012	8.13455e-20	0_uninjured_vs_0_injured_9day	Differentiating fibroblasts
Mest1	3.41633e-22	-3.92806	0.118	0.751	6.17638e-18	0_uninjured_vs_0_injured_9day	Differentiating fibroblasts
Myoc1	6.99684e-22	2.02675	0.162	0.003	1.26496e-17	0_uninjured_vs_0_injured_9day	Differentiating fibroblasts
Mdk1	5.70364e-20	-3.25019	0.029	0.666	1.03116e-15	0_uninjured_vs_0_injured_9day	Differentiating fibroblasts
Smpd31	2.20554e-19	1.6612	0.132	0.001	3.9874e-15	0_uninjured_vs_0_injured_9day	Differentiating fibroblasts
Mpz1	6.97691e-18	1.74192	0.206	0.015	1.26135e-13	0_uninjured_vs_0_injured_9day	Differentiating fibroblasts
H191	1.22416e-17	-3.46172	0.088	0.681	2.21316e-13	0_uninjured_vs_0_injured_9day	Differentiating fibroblasts
Cthrc11	4.74386e-17	-3.10721	0.044	0.618	8.57643e-13	0_uninjured_vs_0_injured_9day	Differentiating fibroblasts
Fstl11	6.86018e-17	-1.23843	0.721	0.946	1.24025e-12	0_uninjured_vs_0_injured_9day	Differentiating fibroblasts
Crispld21	4.56938e-16	2.95805	0.338	0.063	8.26098e-12	0_uninjured_vs_0_injured_9day	Differentiating fibroblasts
Igfbp41	8.44898e-16	-1.51591	0.456	0.876	1.52749e-11	0_uninjured_vs_0_injured_9day	Differentiating fibroblasts
Dcn1	1.66087e-15	1.73791	0.941	0.936	3.00269e-11	0_uninjured_vs_0_injured_9day	Differentiating fibroblasts
Inmt1	2.73583e-15	2.1657	0.147	0.007	4.94611e-11	0_uninjured_vs_0_injured_9day	Differentiating fibroblasts
Igf11	1.24342e-14	-1.77799	0.412	0.827	2.24798e-10	0_uninjured_vs_0_injured_9day	Differentiating fibroblasts
Pcolce21	1.38439e-14	2.03235	0.265	0.039	2.50284e-10	0_uninjured_vs_0_injured_9day	Differentiating fibroblasts
Scara51	1.58418e-14	2.16595	0.368	0.083	2.86405e-10	0_uninjured_vs_0_injured_9day	Differentiating fibroblasts
Vmp11	4.19517e-14	-2.03458	0.044	0.561	7.58445e-10	0_uninjured_vs_0_injured_9day	Differentiating fibroblasts
C71	4.15282e-13	0.930828	0.103	0.003	7.50788e-09	0_uninjured_vs_0_injured_9day	Differentiating fibroblasts
Tnc1	6.59871e-13	-3.86329	0.059	0.532	1.19298e-08	0_uninjured_vs_0_injured_9day	Differentiating fibroblasts
Rplp11	1.68727e-12	-1.16851	0.662	0.878	3.05041e-08	0_uninjured_vs_0_injured_9day	Differentiating fibroblasts
Shisa31	2.39216e-12	1.25366	0.132	0.009	4.32479e-08	0_uninjured_vs_0_injured_9day	Differentiating fibroblasts
Cdh111	2.48115e-12	-1.97444	0.088	0.583	4.48567e-08	0_uninjured_vs_0_injured_9day	Differentiating fibroblasts
Sox41	2.81904e-12	-2.14106	0.044	0.501	5.09655e-08	0_uninjured_vs_0_injured_9day	Differentiating fibroblasts
Rps31	4.11824e-12	-1.4424	0.441	0.784	7.44537e-08	0_uninjured_vs_0_injured_9day	Differentiating fibroblasts
Itm2a	5.16655e-12	-1.65355	0.294	0.758	9.3406e-08	0_uninjured_vs_0_injured_9day	Differentiating fibroblasts
Timp11	5.26999e-12	-2.26905	0.059	0.525	9.52761e-08	0_uninjured_vs_0_injured_9day	Differentiating fibroblasts
Sept111	6.7616e-12	-1.95148	0.132	0.601	1.22243e-07	0_uninjured_vs_0_injured_9day	Differentiating fibroblasts
Plagl11	2.21875e-11	-2.27329	0.029	0.474	4.01127e-07	0_uninjured_vs_0_injured_9day	Differentiating fibroblasts
Serpine2	2.25317e-11	-2.68908	0.118	0.554	4.0735e-07	0_uninjured_vs_0_injured_9day	Differentiating fibroblasts
Wnt111	2.42287e-11	0.975645	0.118	0.007	4.38032e-07	0_uninjured_vs_0_injured_9day	Differentiating fibroblasts
Ptn1	3.34736e-11	-1.95999	0.074	0.534	6.0517e-07	0_uninjured_vs_0_injured_9day	Differentiating fibroblasts
Gnb2l11	5.34926e-11	-1.46023	0.382	0.738	9.67093e-07	0_uninjured_vs_0_injured_9day	Differentiating fibroblasts
Dpep11	6.63776e-11	2.22118	0.324	0.087	1.20004e-06	0_uninjured_vs_0_injured_9day	Differentiating fibroblasts
Hbb-bs1	6.90708e-11	0.33577	0.471	0.187	1.24873e-06	0_uninjured_vs_0_injured_9day	Differentiating fibroblasts
Csrp21	9.47389e-11	-1.93377	0.088	0.525	1.71278e-06	0_uninjured_vs_0_injured_9day	Differentiating fibroblasts
Tpm11	1.03652e-10	-1.66535	0.265	0.665	1.87393e-06	0_uninjured_vs_0_injured_9day	Differentiating fibroblasts
Rbp11	1.09216e-10	-1.64968	0.132	0.595	1.97452e-06	0_uninjured_vs_0_injured_9day	Differentiating fibroblasts
Rps201	1.27763e-10	-1.28438	0.471	0.784	2.30982e-06	0_uninjured_vs_0_injured_9day	Differentiating fibroblasts
Eef1b21	1.35295e-10	-1.39194	0.294	0.707	2.446e-06	0_uninjured_vs_0_injured_9day	Differentiating fibroblasts
Malat11	1.40726e-10	1.31331	1	0.968	2.54419e-06	0_uninjured_vs_0_injured_9day	Differentiating fibroblasts
Fbn21	1.69034e-10	-2.17554	0.015	0.427	3.05596e-06	0_uninjured_vs_0_injured_9day	Differentiating fibroblasts
Mfap51	2.67205e-10	-1.2047	0.397	0.777	4.8308e-06	0_uninjured_vs_0_injured_9day	Differentiating fibroblasts
Mfap21	2.86676e-10	-1.40407	0.221	0.66	5.18281e-06	0_uninjured_vs_0_injured_9day	Differentiating fibroblasts
Ckap41	3.03835e-10	-1.44882	0.25	0.687	5.49303e-06	0_uninjured_vs_0_injured_9day	Differentiating fibroblasts
Mmp141	4.75548e-10	-1.52376	0.324	0.723	8.59744e-06	0_uninjured_vs_0_injured_9day	Differentiating fibroblasts
Nrep	5.2649e-10	-1.61166	0.147	0.573	9.51841e-06	0_uninjured_vs_0_injured_9day	Differentiating fibroblasts
Pdia31	7.58654e-10	-1.34212	0.353	0.724	1.37157e-05	0_uninjured_vs_0_injured_9day	Differentiating fibroblasts
Hsp90ab11	9.37339e-10	-0.89531	0.544	0.873	1.69462e-05	0_uninjured_vs_0_injured_9day	Differentiating fibroblasts
Vcan1	1.90942e-09	-1.43659	0.221	0.643	3.45204e-05	0_uninjured_vs_0_injured_9day	Differentiating fibroblasts
Marcksl11	2.57579e-09	-1.52717	0	0.367	4.65676e-05	0_uninjured_vs_0_injured_9day	Differentiating fibroblasts
Abca61	2.65498e-09	1.8377	0.147	0.019	4.79995e-05	0_uninjured_vs_0_injured_9day	Differentiating fibroblasts
Igfbp71	2.76965e-09	-1.02513	0.706	0.895	5.00724e-05	0_uninjured_vs_0_injured_9day	Differentiating fibroblasts
Col4a51	3.01968e-09	1.24921	0.206	0.039	5.45928e-05	0_uninjured_vs_0_injured_9day	Differentiating fibroblasts
Calr1	4.73811e-09	-1.11519	0.471	0.796	8.56603e-05	0_uninjured_vs_0_injured_9day	Differentiating fibroblasts
Gstm11	4.86518e-09	1.67161	0.338	0.114	8.79575e-05	0_uninjured_vs_0_injured_9day	Differentiating fibroblasts
Ldlr1	5.08281e-09	1.16363	0.118	0.012	9.18921e-05	0_uninjured_vs_0_injured_9day	Differentiating fibroblasts
Lamb11	5.70598e-09	-1.17609	0.162	0.601	0.000103158	0_uninjured_vs_0_injured_9day	Differentiating fibroblasts
Cfl11	6.69724e-09	-1.05414	0.191	0.593	0.000121079	0_uninjured_vs_0_injured_9day	Differentiating fibroblasts
Lgals11	8.74421e-09	-1.01414	0.632	0.837	0.000158086	0_uninjured_vs_0_injured_9day	Differentiating fibroblasts
Zbtb201	8.76204e-09	1.92162	0.662	0.469	0.000158409	0_uninjured_vs_0_injured_9day	Differentiating fibroblasts
Spp11	1.00573e-08	-3.25481	0	0.347	0.000181826	0_uninjured_vs_0_injured_9day	Differentiating fibroblasts
Rps261	1.30771e-08	-1.1345	0.5	0.759	0.000236421	0_uninjured_vs_0_injured_9day	Differentiating fibroblasts
Cnn31	1.68059e-08	-1.32978	0.132	0.516	0.000303834	0_uninjured_vs_0_injured_9day	Differentiating fibroblasts
Rpl81	2.02304e-08	-1.14562	0.471	0.748	0.000365745	0_uninjured_vs_0_injured_9day	Differentiating fibroblasts
Npm11	3.2129e-08	-1.34266	0.176	0.56	0.00058086	0_uninjured_vs_0_injured_9day	Differentiating fibroblasts
Mtch11	4.0233e-08	-1.10916	0.162	0.536	0.000727372	0_uninjured_vs_0_injured_9day	Differentiating fibroblasts
Plac81	4.24597e-08	-1.74291	0.029	0.37	0.00076763	0_uninjured_vs_0_injured_9day	Differentiating fibroblasts
Gm239351	5.12937e-08	1.30844	0.265	0.073	0.000927339	0_uninjured_vs_0_injured_9day	Differentiating fibroblasts
Spock21	5.34151e-08	0.971394	0.103	0.01	0.000965692	0_uninjured_vs_0_injured_9day	Differentiating fibroblasts
Lsp11	5.92317e-08	-1.36706	0.441	0.72	0.00107085	0_uninjured_vs_0_injured_9day	Differentiating fibroblasts
Ecm11	6.29568e-08	1.99109	0.559	0.364	0.0011382	0_uninjured_vs_0_injured_9day	Differentiating fibroblasts
Vwa11	6.62392e-08	1.72488	0.324	0.112	0.00119754	0_uninjured_vs_0_injured_9day	Differentiating fibroblasts
Pdia61	6.78407e-08	-1.10169	0.294	0.655	0.00122649	0_uninjured_vs_0_injured_9day	Differentiating fibroblasts
Dlk11	7.83508e-08	-2.62859	0.059	0.395	0.0014165	0_uninjured_vs_0_injured_9day	Differentiating fibroblasts
Wls1	8.15636e-08	-1.19818	0.147	0.526	0.00147459	0_uninjured_vs_0_injured_9day	Differentiating fibroblasts
Rpl42	8.58285e-08	-1.00593	0.5	0.741	0.00155169	0_uninjured_vs_0_injured_9day	Differentiating fibroblasts
Col14a11	1.00852e-07	-0.891272	0.353	0.746	0.00182331	0_uninjured_vs_0_injured_9day	Differentiating fibroblasts
Copb21	1.08787e-07	-1.16944	0.118	0.474	0.00196675	0_uninjured_vs_0_injured_9day	Differentiating fibroblasts
Col18a1	1.17359e-07	-1.33197	0.118	0.481	0.00212174	0_uninjured_vs_0_injured_9day	Differentiating fibroblasts
Rpl13a1	1.19278e-07	-0.920943	0.618	0.796	0.00215643	0_uninjured_vs_0_injured_9day	Differentiating fibroblasts
C1qtnf61	1.1991e-07	-1.12487	0.132	0.501	0.00216785	0_uninjured_vs_0_injured_9day	Differentiating fibroblasts
Rplp01	1.40146e-07	-1.11284	0.426	0.726	0.0025337	0_uninjured_vs_0_injured_9day	Differentiating fibroblasts
2410015M20Rik1	1.54297e-07	-1.01638	0.029	0.348	0.00278953	0_uninjured_vs_0_injured_9day	Differentiating fibroblasts
Gdi21	1.54516e-07	-1.17647	0.074	0.424	0.0027935	0_uninjured_vs_0_injured_9day	Differentiating fibroblasts
Wbp51	1.65459e-07	-1.21216	0.25	0.62	0.00299133	0_uninjured_vs_0_injured_9day	Differentiating fibroblasts
Fzd21	1.72257e-07	-1.09424	0.074	0.414	0.00311424	0_uninjured_vs_0_injured_9day	Differentiating fibroblasts
Rps141	1.7646e-07	-0.84575	0.544	0.8	0.00319023	0_uninjured_vs_0_injured_9day	Differentiating fibroblasts
Maged11	1.82311e-07	-0.929295	0.206	0.585	0.003296	0_uninjured_vs_0_injured_9day	Differentiating fibroblasts
Hlf1	1.99839e-07	1.40958	0.103	0.012	0.00361289	0_uninjured_vs_0_injured_9day	Differentiating fibroblasts
Atxn7l3b1	2.02337e-07	-0.906172	0.132	0.504	0.00365804	0_uninjured_vs_0_injured_9day	Differentiating fibroblasts
Thy11	2.06464e-07	-0.860573	0.088	0.448	0.00373266	0_uninjured_vs_0_injured_9day	Differentiating fibroblasts
Ssr21	2.09752e-07	-1.14823	0.147	0.516	0.0037921	0_uninjured_vs_0_injured_9day	Differentiating fibroblasts
Tgfbr21	2.13321e-07	-1.38614	0.132	0.468	0.00385662	0_uninjured_vs_0_injured_9day	Differentiating fibroblasts
Cldn1	2.16989e-07	-1.68212	0.015	0.321	0.00392295	0_uninjured_vs_0_injured_9day	Differentiating fibroblasts
Lyz21	2.23809e-07	-1.72163	0.015	0.318	0.00404625	0_uninjured_vs_0_injured_9day	Differentiating fibroblasts
Surf41	2.51851e-07	-1.1305	0.147	0.506	0.00455322	0_uninjured_vs_0_injured_9day	Differentiating fibroblasts
Rtn41	3.00572e-07	-1.13637	0.132	0.493	0.00543404	0_uninjured_vs_0_injured_9day	Differentiating fibroblasts
Pdia41	3.24209e-07	-1.28617	0.132	0.468	0.00586138	0_uninjured_vs_0_injured_9day	Differentiating fibroblasts
Rps91	3.98361e-07	-0.865951	0.529	0.797	0.00720196	0_uninjured_vs_0_injured_9day	Differentiating fibroblasts
Cdk41	4.252e-07	-1.24931	0.147	0.475	0.00768719	0_uninjured_vs_0_injured_9day	Differentiating fibroblasts
Hnrnpab1	4.48232e-07	-1.21163	0.206	0.558	0.00810358	0_uninjured_vs_0_injured_9day	Differentiating fibroblasts
Tubb51	4.65262e-07	-1.01057	0.176	0.539	0.00841147	0_uninjured_vs_0_injured_9day	Differentiating fibroblasts
Ugcg1	4.73379e-07	-1.24657	0.029	0.337	0.00855821	0_uninjured_vs_0_injured_9day	Differentiating fibroblasts
Hspa51	5.15959e-07	-0.824149	0.662	0.848	0.00932802	0_uninjured_vs_0_injured_9day	Differentiating fibroblasts
Hmgn11	5.53987e-07	-0.892594	0.162	0.516	0.0100155	0_uninjured_vs_0_injured_9day	Differentiating fibroblasts
Spcs11	5.59352e-07	-1.15422	0.147	0.488	0.0101125	0_uninjured_vs_0_injured_9day	Differentiating fibroblasts
Pamr11	5.86592e-07	1.81425	0.324	0.125	0.010605	0_uninjured_vs_0_injured_9day	Differentiating fibroblasts
Dad11	6.0304e-07	-0.987485	0.176	0.535	0.0109024	0_uninjured_vs_0_injured_9day	Differentiating fibroblasts
Hdgf1	6.84588e-07	-1.1788	0.015	0.306	0.0123767	0_uninjured_vs_0_injured_9day	Differentiating fibroblasts
1500012F01Rik1	6.90124e-07	-0.942613	0.074	0.404	0.0124767	0_uninjured_vs_0_injured_9day	Differentiating fibroblasts
Prdx21	7.00125e-07	-0.930148	0.147	0.474	0.0126576	0_uninjured_vs_0_injured_9day	Differentiating fibroblasts
Col12a11	7.008e-07	-1.27523	0.132	0.483	0.0126698	0_uninjured_vs_0_injured_9day	Differentiating fibroblasts
Ace1	7.03587e-07	1.5803	0.338	0.137	0.0127201	0_uninjured_vs_0_injured_9day	Differentiating fibroblasts
Hspd11	7.06577e-07	-1.06495	0.044	0.362	0.0127742	0_uninjured_vs_0_injured_9day	Differentiating fibroblasts
Eif5a1	7.32966e-07	-1.21065	0.176	0.5	0.0132513	0_uninjured_vs_0_injured_9day	Differentiating fibroblasts
Psmb11	8.01189e-07	-1.06241	0.176	0.535	0.0144847	0_uninjured_vs_0_injured_9day	Differentiating fibroblasts
Ap2s11	8.19975e-07	-1.23319	0.044	0.338	0.0148243	0_uninjured_vs_0_injured_9day	Differentiating fibroblasts
Prdx51	8.69305e-07	-1.29774	0.147	0.465	0.0157162	0_uninjured_vs_0_injured_9day	Differentiating fibroblasts
Ppap2b1	8.92728e-07	1.63272	0.603	0.478	0.0161396	0_uninjured_vs_0_injured_9day	Differentiating fibroblasts
Cox6a11	9.63234e-07	-0.967432	0.25	0.614	0.0174143	0_uninjured_vs_0_injured_9day	Differentiating fibroblasts
Sec11a1	9.83967e-07	-1.00922	0.074	0.391	0.0177891	0_uninjured_vs_0_injured_9day	Differentiating fibroblasts
Canx1	9.90585e-07	-0.96097	0.338	0.668	0.0179088	0_uninjured_vs_0_injured_9day	Differentiating fibroblasts
Emb1	1.07005e-06	-1.44832	0	0.271	0.0193455	0_uninjured_vs_0_injured_9day	Differentiating fibroblasts
Fabp41	1.10984e-06	1.96974	0.382	0.175	0.0200648	0_uninjured_vs_0_injured_9day	Differentiating fibroblasts
Cnbp1	1.16775e-06	-0.529974	0.147	0.513	0.0211118	0_uninjured_vs_0_injured_9day	Differentiating fibroblasts
Vim1	1.24883e-06	-0.816191	0.618	0.822	0.0225775	0_uninjured_vs_0_injured_9day	Differentiating fibroblasts
Tspan32	1.2999e-06	-1.13942	0.132	0.459	0.0235008	0_uninjured_vs_0_injured_9day	Differentiating fibroblasts
Runx11	1.39416e-06	-1.06509	0.015	0.296	0.025205	0_uninjured_vs_0_injured_9day	Differentiating fibroblasts
Mlec1	1.39832e-06	-0.899813	0.074	0.385	0.0252802	0_uninjured_vs_0_injured_9day	Differentiating fibroblasts
Hif1a1	1.40451e-06	-1.36861	0.103	0.401	0.0253921	0_uninjured_vs_0_injured_9day	Differentiating fibroblasts
Fosl21	1.48186e-06	-1.14424	0.015	0.294	0.0267906	0_uninjured_vs_0_injured_9day	Differentiating fibroblasts
Hs6st21	1.49611e-06	-1.27721	0	0.265	0.0270482	0_uninjured_vs_0_injured_9day	Differentiating fibroblasts
D17Wsu104e1	1.67505e-06	-1.06325	0.059	0.356	0.0302833	0_uninjured_vs_0_injured_9day	Differentiating fibroblasts
Rcn21	1.67608e-06	-1.12071	0.088	0.394	0.0303019	0_uninjured_vs_0_injured_9day	Differentiating fibroblasts
Stat31	1.69441e-06	-0.683534	0.059	0.373	0.0306332	0_uninjured_vs_0_injured_9day	Differentiating fibroblasts
Swi51	1.76588e-06	-0.950755	0.235	0.574	0.0319253	0_uninjured_vs_0_injured_9day	Differentiating fibroblasts
Adam121	1.76694e-06	-1.19818	0	0.262	0.0319444	0_uninjured_vs_0_injured_9day	Differentiating fibroblasts
Gdf101	1.7942e-06	1.49145	0.324	0.133	0.0324373	0_uninjured_vs_0_injured_9day	Differentiating fibroblasts
Pros11	2.03965e-06	-0.660112	0.044	0.347	0.0368748	0_uninjured_vs_0_injured_9day	Differentiating fibroblasts
Ldha1	2.08563e-06	-0.613479	0.118	0.446	0.0377062	0_uninjured_vs_0_injured_9day	Differentiating fibroblasts
Sec61b1	2.34512e-06	-1.05821	0.206	0.544	0.0423974	0_uninjured_vs_0_injured_9day	Differentiating fibroblasts
Ranbp11	2.53066e-06	-1.19428	0.132	0.456	0.0457518	0_uninjured_vs_0_injured_9day	Differentiating fibroblasts
Chd31	2.54884e-06	-1.13497	0.132	0.453	0.0460805	0_uninjured_vs_0_injured_9day	Differentiating fibroblasts
Thbs41	2.56828e-06	-0.863061	0.132	0.443	0.046432	0_uninjured_vs_0_injured_9day	Differentiating fibroblasts
Tmem1671	2.61878e-06	-1.00106	0.147	0.471	0.0473449	0_uninjured_vs_0_injured_9day	Differentiating fibroblasts
Rpl321	2.63065e-06	-0.864691	0.574	0.757	0.0475596	0_uninjured_vs_0_injured_9day	Differentiating fibroblasts
Fam162a1	2.64912e-06	-1.09671	0.029	0.3	0.0478935	0_uninjured_vs_0_injured_9day	Differentiating fibroblasts
Fbln21	2.72075e-06	1.59435	0.588	0.437	0.0491884	0_uninjured_vs_0_injured_9day	Differentiating fibroblasts
Pdlim71	2.74724e-06	-0.475913	0.059	0.347	0.0496673	0_uninjured_vs_0_injured_9day	Differentiating fibroblasts
Mgp1	2.76361e-06	-1.39008	0.397	0.695	0.0499634	0_uninjured_vs_0_injured_9day	Differentiating fibroblasts

## Sheet: Endothelial cells
	p_val	avg_log2FC	pct.1	pct.2	p_val_adj	comparison
Gm175414	2.04563e-59	2.27154	0.575	0.068	3.6983e-55	1_injured_3day_vs_1_injured_9day			Endothelial cells
Gm102885	3.81933e-45	2.09195	0.7	0.279	6.90497e-41	1_injured_3day_vs_1_injured_9day			Endothelial cells
Gm39404	1.61327e-43	1.71633	0.522	0.093	2.91663e-39	1_injured_3day_vs_1_injured_9day			Endothelial cells
Rpl9-ps65	1.27533e-40	2.00697	0.64	0.228	2.30568e-36	1_injured_3day_vs_1_injured_9day			Endothelial cells
Rpl21-ps43	1.08593e-37	1.70087	0.522	0.127	1.96325e-33	1_injured_3day_vs_1_injured_9day			Endothelial cells
Rpsa-ps103	2.96292e-35	1.68597	0.704	0.321	5.35665e-31	1_injured_3day_vs_1_injured_9day			Endothelial cells
Gm100735	3.2869e-35	1.59366	0.587	0.186	5.94239e-31	1_injured_3day_vs_1_injured_9day			Endothelial cells
Gm102695	2.22043e-34	1.70002	0.636	0.259	4.01432e-30	1_injured_3day_vs_1_injured_9day			Endothelial cells
Gm100764	6.39282e-34	1.43895	0.765	0.475	1.15576e-29	1_injured_3day_vs_1_injured_9day			Endothelial cells
Rpl344	3.89616e-32	1.71315	0.688	0.373	7.04387e-28	1_injured_3day_vs_1_injured_9day			Endothelial cells
Rpl13-ps34	1.1588e-31	1.66536	0.656	0.312	2.09499e-27	1_injured_3day_vs_1_injured_9day			Endothelial cells
Gm174304	5.00159e-31	1.42741	0.425	0.087	9.04238e-27	1_injured_3day_vs_1_injured_9day			Endothelial cells
Spp14	2.57334e-30	1.22263	0.429	0.087	4.65235e-26	1_injured_3day_vs_1_injured_9day			Endothelial cells
Gm150134	4.50301e-30	1.06838	0.352	0.046	8.141e-26	1_injured_3day_vs_1_injured_9day			Endothelial cells
Gm227614	1.6427e-29	1.27206	0.405	0.078	2.96984e-25	1_injured_3day_vs_1_injured_9day			Endothelial cells
Gm224263	2.7833e-29	1.26677	0.457	0.11	5.03193e-25	1_injured_3day_vs_1_injured_9day			Endothelial cells
Wdr894	2.99253e-28	1.17625	0.814	0.624	5.4102e-24	1_injured_3day_vs_1_injured_9day			Endothelial cells
Gm84444	2.99815e-28	1.47041	0.498	0.152	5.42035e-24	1_injured_3day_vs_1_injured_9day			Endothelial cells
Mir6824	1.26458e-27	1.39377	0.47	0.137	2.28623e-23	1_injured_3day_vs_1_injured_9day			Endothelial cells
Gm227594	1.87583e-27	0.821073	0.296	0.03	3.39132e-23	1_injured_3day_vs_1_injured_9day			Endothelial cells
Rps10-ps14	4.02219e-27	1.39098	0.721	0.454	7.27172e-23	1_injured_3day_vs_1_injured_9day			Endothelial cells
Rpl13a-ps14	6.85092e-27	1.43531	0.478	0.141	1.23858e-22	1_injured_3day_vs_1_injured_9day			Endothelial cells
Cenpq3	1.27232e-26	1.13299	0.332	0.048	2.30024e-22	1_injured_3day_vs_1_injured_9day			Endothelial cells
Fos4	1.33486e-26	-1.45969	0.648	0.84	2.4133e-22	1_injured_3day_vs_1_injured_9day			Endothelial cells
Gm225823	1.51035e-26	0.885168	0.235	0.01	2.73057e-22	1_injured_3day_vs_1_injured_9day			Endothelial cells
Gm65763	3.21314e-26	1.46137	0.466	0.141	5.80903e-22	1_injured_3day_vs_1_injured_9day			Endothelial cells
Gm52443	3.27713e-26	0.993341	0.263	0.021	5.92473e-22	1_injured_3day_vs_1_injured_9day			Endothelial cells
Ly6c24	2.4144e-25	1.51485	0.344	0.063	4.365e-21	1_injured_3day_vs_1_injured_9day			Endothelial cells
Nfkbia2	1.13486e-24	-1.7764	0.68	0.825	2.05172e-20	1_injured_3day_vs_1_injured_9day			Endothelial cells
Zfp363	2.2491e-24	-1.55889	0.547	0.774	4.06615e-20	1_injured_3day_vs_1_injured_9day			Endothelial cells
Gm248653	3.06181e-24	0.697093	0.223	0.011	5.53546e-20	1_injured_3day_vs_1_injured_9day			Endothelial cells
Gm249513	4.193e-24	0.749603	0.255	0.023	7.58052e-20	1_injured_3day_vs_1_injured_9day			Endothelial cells
Gm102605	7.51647e-24	1.21489	0.721	0.521	1.3589e-19	1_injured_3day_vs_1_injured_9day			Endothelial cells
Rpl9-ps13	8.54884e-24	0.896743	0.279	0.034	1.54554e-19	1_injured_3day_vs_1_injured_9day			Endothelial cells
Gm230613	8.63912e-24	0.607093	0.215	0.01	1.56187e-19	1_injured_3day_vs_1_injured_9day			Endothelial cells
Rpl18a5	2.07602e-23	1.24317	0.713	0.477	3.75324e-19	1_injured_3day_vs_1_injured_9day			Endothelial cells
Gm255953	4.48512e-23	0.63892	0.19	0.004	8.10865e-19	1_injured_3day_vs_1_injured_9day			Endothelial cells
mt-Rnr23	9.17067e-23	-0.869686	0.955	0.99	1.65796e-18	1_injured_3day_vs_1_injured_9day			Endothelial cells
Gm51604	1.53411e-22	1.28394	0.437	0.137	2.77352e-18	1_injured_3day_vs_1_injured_9day			Endothelial cells
Junb4	8.34453e-22	-1.33463	0.587	0.772	1.50861e-17	1_injured_3day_vs_1_injured_9day			Endothelial cells
Gm61333	2.2323e-21	0.696296	0.251	0.03	4.03578e-17	1_injured_3day_vs_1_injured_9day			Endothelial cells
Lrrc585	5.02579e-21	1.22714	0.729	0.487	9.08612e-17	1_injured_3day_vs_1_injured_9day			Endothelial cells
Rpl36-ps34	1.01399e-20	1.27452	0.449	0.163	1.83319e-16	1_injured_3day_vs_1_injured_9day			Endothelial cells
Ier25	1.66709e-20	-1.5108	0.526	0.736	3.01393e-16	1_injured_3day_vs_1_injured_9day			Endothelial cells
Gm78083	7.30317e-20	1.17994	0.506	0.215	1.32034e-15	1_injured_3day_vs_1_injured_9day			Endothelial cells
Rpl21-ps63	1.0689e-19	0.508653	0.182	0.01	1.93247e-15	1_injured_3day_vs_1_injured_9day			Endothelial cells
Gm102754	3.04259e-19	1.18309	0.595	0.323	5.5007e-15	1_injured_3day_vs_1_injured_9day			Endothelial cells
Gm20003	6.0031e-19	1.11337	0.534	0.247	1.0853e-14	1_injured_3day_vs_1_injured_9day			Endothelial cells
Rbp72	6.11302e-19	2.08548	0.401	0.125	1.10517e-14	1_injured_3day_vs_1_injured_9day			Endothelial cells
Egr14	8.2012e-19	-1.23193	0.571	0.774	1.4827e-14	1_injured_3day_vs_1_injured_9day			Endothelial cells
Ier35	1.61889e-18	-1.63817	0.437	0.667	2.92679e-14	1_injured_3day_vs_1_injured_9day			Endothelial cells
Gm94934	2.21474e-18	1.13003	0.377	0.118	4.00402e-14	1_injured_3day_vs_1_injured_9day			Endothelial cells
Gm175113	4.53271e-18	0.769953	0.296	0.065	8.19469e-14	1_injured_3day_vs_1_injured_9day			Endothelial cells
Gm98433	5.02019e-18	0.919587	0.749	0.603	9.076e-14	1_injured_3day_vs_1_injured_9day			Endothelial cells
Ppp1r15a5	8.50678e-18	-1.49537	0.291	0.584	1.53794e-13	1_injured_3day_vs_1_injured_9day			Endothelial cells
Gm118083	2.38019e-17	0.614548	0.271	0.055	4.30314e-13	1_injured_3day_vs_1_injured_9day			Endothelial cells
Rpl134	5.68927e-17	0.884932	0.781	0.625	1.02856e-12	1_injured_3day_vs_1_injured_9day			Endothelial cells
Gm101264	6.52019e-17	0.837363	0.267	0.055	1.17879e-12	1_injured_3day_vs_1_injured_9day			Endothelial cells
Fosb5	7.85919e-17	-1.55586	0.445	0.662	1.42086e-12	1_injured_3day_vs_1_injured_9day			Endothelial cells
Rps284	1.11802e-16	0.998741	0.7	0.506	2.02127e-12	1_injured_3day_vs_1_injured_9day			Endothelial cells
Rpl234	1.13165e-16	0.824632	0.814	0.686	2.04592e-12	1_injured_3day_vs_1_injured_9day			Endothelial cells
2004-06-01	2.14326e-16	-1.1208	0.713	0.821	3.87481e-12	1_injured_3day_vs_1_injured_9day			Endothelial cells
Rps3a23	2.69587e-16	0.790122	0.255	0.051	4.87387e-12	1_injured_3day_vs_1_injured_9day			Endothelial cells
Rpl305	3.85542e-16	1.23234	0.567	0.338	6.97021e-12	1_injured_3day_vs_1_injured_9day			Endothelial cells
Gm76763	6.45862e-16	1.05487	0.409	0.156	1.16765e-11	1_injured_3day_vs_1_injured_9day			Endothelial cells
Rps26-ps14	6.51952e-16	0.992313	0.721	0.542	1.17866e-11	1_injured_3day_vs_1_injured_9day			Endothelial cells
Gm52773	1.86155e-15	0.619211	0.178	0.021	3.3655e-11	1_injured_3day_vs_1_injured_9day			Endothelial cells
Rpl37a3	2.29488e-15	0.708967	0.81	0.673	4.1489e-11	1_injured_3day_vs_1_injured_9day			Endothelial cells
Tmem2454	2.30346e-15	1.19032	0.389	0.141	4.16442e-11	1_injured_3day_vs_1_injured_9day			Endothelial cells
Gm102634	2.39478e-15	1.14629	0.652	0.464	4.32953e-11	1_injured_3day_vs_1_injured_9day			Endothelial cells
Gm93963	3.3956e-15	0.473257	0.146	0.01	6.1389e-11	1_injured_3day_vs_1_injured_9day			Endothelial cells
Gm119833	4.72698e-15	0.376762	0.182	0.023	8.5459e-11	1_injured_3day_vs_1_injured_9day			Endothelial cells
Gm227572	5.00418e-15	0.277606	0.134	0.006	9.04705e-11	1_injured_3day_vs_1_injured_9day			Endothelial cells
Gm21781	5.98955e-15	0.407706	0.15	0.011	1.08285e-10	1_injured_3day_vs_1_injured_9day			Endothelial cells
Fn14	7.36055e-15	0.88366	0.522	0.257	1.33071e-10	1_injured_3day_vs_1_injured_9day			Endothelial cells
Rpsa4	1.01898e-14	0.952009	0.721	0.521	1.84221e-10	1_injured_3day_vs_1_injured_9day			Endothelial cells
Gm49532	1.04318e-14	0.493526	0.178	0.023	1.88596e-10	1_injured_3day_vs_1_injured_9day			Endothelial cells
Nfkbiz5	1.09213e-14	-1.70288	0.385	0.586	1.97446e-10	1_injured_3day_vs_1_injured_9day			Endothelial cells
Gm231921	2.77108e-14	0.52928	0.113	0.002	5.00983e-10	1_injured_3day_vs_1_injured_9day			Endothelial cells
Gm170874	2.92129e-14	0.773059	0.239	0.053	5.28139e-10	1_injured_3day_vs_1_injured_9day			Endothelial cells
Nr4a15	3.98157e-14	-1.73941	0.279	0.506	7.19828e-10	1_injured_3day_vs_1_injured_9day			Endothelial cells
Atf34	4.64144e-14	-1.7507	0.198	0.443	8.39126e-10	1_injured_3day_vs_1_injured_9day			Endothelial cells
Fabp44	5.60423e-14	0.982919	0.854	0.622	1.01319e-09	1_injured_3day_vs_1_injured_9day			Endothelial cells
Btg25	7.02794e-14	-1.34952	0.372	0.587	1.27058e-09	1_injured_3day_vs_1_injured_9day			Endothelial cells
Mndal4	7.96889e-14	1.04047	0.498	0.247	1.4407e-09	1_injured_3day_vs_1_injured_9day			Endothelial cells
Ly6a4	9.16503e-14	0.954369	0.721	0.471	1.65695e-09	1_injured_3day_vs_1_injured_9day			Endothelial cells
Rps254	1.65219e-13	0.865334	0.644	0.471	2.987e-09	1_injured_3day_vs_1_injured_9day			Endothelial cells
Zkscan13	2.36822e-13	0.732479	0.255	0.067	4.2815e-09	1_injured_3day_vs_1_injured_9day			Endothelial cells
Hspa55	3.33149e-13	-1.14868	0.611	0.719	6.02301e-09	1_injured_3day_vs_1_injured_9day			Endothelial cells
Rpl113	5.06853e-13	1.02623	0.575	0.373	9.1634e-09	1_injured_3day_vs_1_injured_9day			Endothelial cells
Rpl35a4	6.07079e-13	0.996161	0.579	0.35	1.09754e-08	1_injured_3day_vs_1_injured_9day			Endothelial cells
Gm50934	6.9468e-13	0.82525	0.275	0.082	1.25591e-08	1_injured_3day_vs_1_injured_9day			Endothelial cells
Gm107843	7.30262e-13	0.332905	0.109	0.004	1.32024e-08	1_injured_3day_vs_1_injured_9day			Endothelial cells
Rps3a35	9.2066e-13	0.688514	0.66	0.411	1.66446e-08	1_injured_3day_vs_1_injured_9day			Endothelial cells
Orc53	1.3357e-12	0.612917	0.368	0.146	2.41482e-08	1_injured_3day_vs_1_injured_9day			Endothelial cells
Rpl64	1.68131e-12	0.811197	0.709	0.523	3.03964e-08	1_injured_3day_vs_1_injured_9day			Endothelial cells
Gm102504	1.86518e-12	1.1026	0.445	0.232	3.37207e-08	1_injured_3day_vs_1_injured_9day			Endothelial cells
Gm47751	2.00084e-12	0.642333	0.117	0.008	3.61732e-08	1_injured_3day_vs_1_injured_9day			Endothelial cells
Gm98462	2.08031e-12	0.728469	0.34	0.129	3.76099e-08	1_injured_3day_vs_1_injured_9day			Endothelial cells
Sat13	2.65459e-12	-1.38805	0.486	0.65	4.79923e-08	1_injured_3day_vs_1_injured_9day			Endothelial cells
Rps184	2.86079e-12	0.716321	0.385	0.165	5.17202e-08	1_injured_3day_vs_1_injured_9day			Endothelial cells
Gm49683	4.12638e-12	0.66329	0.239	0.065	7.46009e-08	1_injured_3day_vs_1_injured_9day			Endothelial cells
Rps4x4	4.5959e-12	0.779081	0.781	0.654	8.30893e-08	1_injured_3day_vs_1_injured_9day			Endothelial cells
Gm100364	4.73646e-12	0.806231	0.32	0.114	8.56304e-08	1_injured_3day_vs_1_injured_9day			Endothelial cells
Cd361	9.44822e-12	1.02442	0.68	0.441	1.70814e-07	1_injured_3day_vs_1_injured_9day			Endothelial cells
Gm240983	9.74053e-12	0.322477	0.134	0.015	1.76099e-07	1_injured_3day_vs_1_injured_9day			Endothelial cells
Hbb-bs5	2.20114e-11	-0.798916	0.401	0.171	3.97944e-07	1_injured_3day_vs_1_injured_9day			Endothelial cells
Dusp15	3.69169e-11	-1.14886	0.49	0.629	6.67421e-07	1_injured_3day_vs_1_injured_9day			Endothelial cells
Gm48252	4.11544e-11	0.499678	0.142	0.021	7.4403e-07	1_injured_3day_vs_1_injured_9day			Endothelial cells
Rpl354	4.44303e-11	0.767777	0.526	0.317	8.03256e-07	1_injured_3day_vs_1_injured_9day			Endothelial cells
Mgll3	5.00368e-11	0.997313	0.696	0.498	9.04614e-07	1_injured_3day_vs_1_injured_9day			Endothelial cells
Rpl394	5.63319e-11	0.629804	0.838	0.73	1.01842e-06	1_injured_3day_vs_1_injured_9day			Endothelial cells
Gm66252	5.99636e-11	0.542634	0.166	0.032	1.08408e-06	1_injured_3day_vs_1_injured_9day			Endothelial cells
Gm112733	6.25647e-11	0.271246	0.198	0.048	1.13111e-06	1_injured_3day_vs_1_injured_9day			Endothelial cells
Gm56113	7.83539e-11	0.309541	0.174	0.036	1.41656e-06	1_injured_3day_vs_1_injured_9day			Endothelial cells
Eif3j23	8.23042e-11	0.557448	0.275	0.091	1.48798e-06	1_injured_3day_vs_1_injured_9day			Endothelial cells
Cd300lg1	8.46181e-11	0.865046	0.34	0.135	1.52981e-06	1_injured_3day_vs_1_injured_9day			Endothelial cells
Gm64725	1.01307e-10	0.893851	0.656	0.515	1.83153e-06	1_injured_3day_vs_1_injured_9day			Endothelial cells
Gm83941	1.01828e-10	0.319783	0.109	0.01	1.84094e-06	1_injured_3day_vs_1_injured_9day			Endothelial cells
Gm5356	1.23469e-10	0.349873	0.113	0.011	2.2322e-06	1_injured_3day_vs_1_injured_9day			Endothelial cells
Rpl373	1.30643e-10	0.617464	0.798	0.681	2.3619e-06	1_injured_3day_vs_1_injured_9day			Endothelial cells
Rpl28-ps41	2.03962e-10	0.364754	0.101	0.008	3.68742e-06	1_injured_3day_vs_1_injured_9day			Endothelial cells
Rplp24	2.88988e-10	0.427893	0.874	0.781	5.22462e-06	1_injured_3day_vs_1_injured_9day			Endothelial cells
Ifi27l2a3	2.92886e-10	0.834687	0.182	0.044	5.29508e-06	1_injured_3day_vs_1_injured_9day			Endothelial cells
Gm42043	3.01316e-10	0.749905	0.381	0.181	5.44749e-06	1_injured_3day_vs_1_injured_9day			Endothelial cells
Gm81863	3.75975e-10	0.571013	0.3	0.118	6.79725e-06	1_injured_3day_vs_1_injured_9day			Endothelial cells
Hsp90ab13	4.1292e-10	-0.384425	0.915	0.92	7.46517e-06	1_injured_3day_vs_1_injured_9day			Endothelial cells
S100a64	5.13807e-10	0.635181	0.749	0.591	9.28912e-06	1_injured_3day_vs_1_injured_9day			Endothelial cells
Snord131	5.20974e-10	0.913324	0.231	0.072	9.41869e-06	1_injured_3day_vs_1_injured_9day			Endothelial cells
Gm227603	5.87114e-10	0.346206	0.117	0.015	1.06144e-05	1_injured_3day_vs_1_injured_9day			Endothelial cells
Gm17271	6.48014e-10	0.277374	0.113	0.013	1.17154e-05	1_injured_3day_vs_1_injured_9day			Endothelial cells
Thrsp1	8.20758e-10	0.744804	0.194	0.055	1.48385e-05	1_injured_3day_vs_1_injured_9day			Endothelial cells
Nsa23	9.20355e-10	0.396556	0.235	0.074	1.66391e-05	1_injured_3day_vs_1_injured_9day			Endothelial cells
Prrx13	9.46804e-10	0.506314	0.146	0.029	1.71173e-05	1_injured_3day_vs_1_injured_9day			Endothelial cells
Gm127282	1.1553e-09	0.628724	0.231	0.076	2.08866e-05	1_injured_3day_vs_1_injured_9day			Endothelial cells
Cxcl122	1.24897e-09	1.32825	0.555	0.34	2.25802e-05	1_injured_3day_vs_1_injured_9day			Endothelial cells
Gm103203	1.28065e-09	0.790466	0.368	0.173	2.31529e-05	1_injured_3day_vs_1_injured_9day			Endothelial cells
Psme2b4	1.36702e-09	0.638769	0.344	0.154	2.47143e-05	1_injured_3day_vs_1_injured_9day			Endothelial cells
S100a44	2.71522e-09	0.295026	0.227	0.074	4.90884e-05	1_injured_3day_vs_1_injured_9day			Endothelial cells
Mir692-14	3.39466e-09	0.583807	0.3	0.124	6.1372e-05	1_injured_3day_vs_1_injured_9day			Endothelial cells
Rps115	5.07333e-09	0.525743	0.822	0.734	9.17207e-05	1_injured_3day_vs_1_injured_9day			Endothelial cells
Rpl414	5.16051e-09	0.446504	0.862	0.817	9.32969e-05	1_injured_3day_vs_1_injured_9day			Endothelial cells
Rps164	6.58613e-09	0.674008	0.567	0.401	0.000119071	1_injured_3day_vs_1_injured_9day			Endothelial cells
Nr1d12	8.33981e-09	0.354151	0.162	0.04	0.000150775	1_injured_3day_vs_1_injured_9day			Endothelial cells
Rpl10-ps33	1.0445e-08	0.681983	0.32	0.146	0.000188835	1_injured_3day_vs_1_injured_9day			Endothelial cells
Gm45403	1.06395e-08	0.449642	0.17	0.046	0.000192351	1_injured_3day_vs_1_injured_9day			Endothelial cells
Sfrp44	1.95817e-08	0.393945	0.17	0.048	0.000354017	1_injured_3day_vs_1_injured_9day			Endothelial cells
Morf4l15	2.08208e-08	0.686166	0.291	0.129	0.00037642	1_injured_3day_vs_1_injured_9day			Endothelial cells
Rps244	3.36639e-08	0.410539	0.891	0.819	0.000608609	1_injured_3day_vs_1_injured_9day			Endothelial cells
Ifi2033	4.07996e-08	0.619508	0.543	0.342	0.000737615	1_injured_3day_vs_1_injured_9day			Endothelial cells
Gm49502	4.10702e-08	0.497295	0.223	0.082	0.000742508	1_injured_3day_vs_1_injured_9day			Endothelial cells
Cwc223	4.14443e-08	0.834658	0.453	0.26	0.000749272	1_injured_3day_vs_1_injured_9day			Endothelial cells
Gsn5	4.71795e-08	0.344008	0.372	0.188	0.000852958	1_injured_3day_vs_1_injured_9day			Endothelial cells
1810014B01Rik3	5.91673e-08	0.332508	0.138	0.032	0.00106968	1_injured_3day_vs_1_injured_9day			Endothelial cells
Fbn13	6.99141e-08	0.726351	0.393	0.207	0.00126398	1_injured_3day_vs_1_injured_9day			Endothelial cells
Plp21	7.80135e-08	0.397866	0.17	0.051	0.00141041	1_injured_3day_vs_1_injured_9day			Endothelial cells
Gjc13	8.50063e-08	0.712728	0.134	0.032	0.00153683	1_injured_3day_vs_1_injured_9day			Endothelial cells
Btnl91	9.06292e-08	1.23866	0.117	0.025	0.00163849	1_injured_3day_vs_1_injured_9day			Endothelial cells
Cst34	9.60607e-08	0.648981	0.814	0.662	0.00173668	1_injured_3day_vs_1_injured_9day			Endothelial cells
Sdpr3	1.00948e-07	0.53046	0.822	0.717	0.00182503	1_injured_3day_vs_1_injured_9day			Endothelial cells
Ndufs53	1.05885e-07	0.277163	0.223	0.084	0.0019143	1_injured_3day_vs_1_injured_9day			Endothelial cells
Rpl224	1.13951e-07	0.408784	0.818	0.73	0.00206011	1_injured_3day_vs_1_injured_9day			Endothelial cells
Gm100933	1.25654e-07	0.505716	0.206	0.076	0.00227169	1_injured_3day_vs_1_injured_9day			Endothelial cells
Birc53	1.25798e-07	0.372287	0.134	0.032	0.0022743	1_injured_3day_vs_1_injured_9day			Endothelial cells
Gm100643	1.36553e-07	0.385771	0.117	0.025	0.00246874	1_injured_3day_vs_1_injured_9day			Endothelial cells
Ubc4	1.39294e-07	-0.695212	0.648	0.728	0.00251829	1_injured_3day_vs_1_injured_9day			Endothelial cells
Rps84	1.65967e-07	0.512566	0.773	0.696	0.00300051	1_injured_3day_vs_1_injured_9day			Endothelial cells
Slc39a82	1.68685e-07	-1.19228	0.146	0.308	0.00304966	1_injured_3day_vs_1_injured_9day			Endothelial cells
Mapre21	1.73497e-07	0.661153	0.223	0.087	0.00313665	1_injured_3day_vs_1_injured_9day			Endothelial cells
Tpt13	1.73922e-07	0.66912	0.486	0.317	0.00314433	1_injured_3day_vs_1_injured_9day			Endothelial cells
Lgals3bp3	1.78986e-07	0.459649	0.142	0.038	0.00323589	1_injured_3day_vs_1_injured_9day			Endothelial cells
Socs35	2.11566e-07	-1.06622	0.251	0.414	0.0038249	1_injured_3day_vs_1_injured_9day			Endothelial cells
Gm10132	2.2972e-07	0.388939	0.162	0.049	0.0041531	1_injured_3day_vs_1_injured_9day			Endothelial cells
Gm82253	2.39269e-07	0.345807	0.178	0.059	0.00432575	1_injured_3day_vs_1_injured_9day			Endothelial cells
Col6a34	2.43053e-07	0.270502	0.247	0.101	0.00439415	1_injured_3day_vs_1_injured_9day			Endothelial cells
Rps15a4	2.59914e-07	0.419254	0.81	0.766	0.00469899	1_injured_3day_vs_1_injured_9day			Endothelial cells
Pdlim23	2.69695e-07	0.3584	0.15	0.044	0.00487581	1_injured_3day_vs_1_injured_9day			Endothelial cells
Gm100201	2.71287e-07	0.317051	0.126	0.03	0.00490459	1_injured_3day_vs_1_injured_9day			Endothelial cells
Hist1h2al3	2.77923e-07	0.756647	0.162	0.051	0.00502457	1_injured_3day_vs_1_injured_9day			Endothelial cells
Ccdc28b1	2.8954e-07	0.599262	0.267	0.118	0.00523459	1_injured_3day_vs_1_injured_9day			Endothelial cells
Itm2b3	3.046e-07	0.541924	0.879	0.755	0.00550685	1_injured_3day_vs_1_injured_9day			Endothelial cells
Gm12355	3.26656e-07	0.367785	0.113	0.025	0.00590561	1_injured_3day_vs_1_injured_9day			Endothelial cells
Loxl24	3.31178e-07	0.433479	0.101	0.019	0.00598737	1_injured_3day_vs_1_injured_9day			Endothelial cells
Rps152	3.34363e-07	0.374092	0.87	0.766	0.00604495	1_injured_3day_vs_1_injured_9day			Endothelial cells
Ccl24	3.36634e-07	0.554641	0.206	0.08	0.006086	1_injured_3day_vs_1_injured_9day			Endothelial cells
B230369F24Rik3	3.61506e-07	0.272967	0.109	0.023	0.00653566	1_injured_3day_vs_1_injured_9day			Endothelial cells
Uba522	3.82803e-07	0.54336	0.393	0.224	0.00692069	1_injured_3day_vs_1_injured_9day			Endothelial cells
Col13a11	4.52536e-07	0.907149	0.121	0.03	0.00818139	1_injured_3day_vs_1_injured_9day			Endothelial cells
Rpl53	4.7155e-07	0.286513	0.223	0.087	0.00852516	1_injured_3day_vs_1_injured_9day			Endothelial cells
Tpm3-rs75	5.36286e-07	0.74398	0.575	0.422	0.00969551	1_injured_3day_vs_1_injured_9day			Endothelial cells
Tinagl12	7.16315e-07	0.609066	0.53	0.346	0.0129503	1_injured_3day_vs_1_injured_9day			Endothelial cells
Hsph13	8.08912e-07	-0.898469	0.15	0.3	0.0146243	1_injured_3day_vs_1_injured_9day			Endothelial cells
Gm52393	8.24416e-07	0.457334	0.113	0.027	0.0149046	1_injured_3day_vs_1_injured_9day			Endothelial cells
Rnd12	8.50183e-07	-1.18773	0.126	0.274	0.0153705	1_injured_3day_vs_1_injured_9day			Endothelial cells
Pmm12	8.53666e-07	0.360497	0.101	0.021	0.0154334	1_injured_3day_vs_1_injured_9day			Endothelial cells
Esam1	9.35225e-07	-0.541456	0.68	0.759	0.0169079	1_injured_3day_vs_1_injured_9day			Endothelial cells
Ctla2b1	9.43165e-07	0.581755	0.296	0.148	0.0170515	1_injured_3day_vs_1_injured_9day			Endothelial cells
Dnajb16	1.03812e-06	-1.42198	0.211	0.352	0.0187681	1_injured_3day_vs_1_injured_9day			Endothelial cells
Atp5g13	1.07311e-06	0.374656	0.211	0.084	0.0194008	1_injured_3day_vs_1_injured_9day			Endothelial cells
Grcc102	1.11048e-06	0.651208	0.308	0.154	0.0200764	1_injured_3day_vs_1_injured_9day			Endothelial cells
Rps232	1.22335e-06	0.397941	0.304	0.15	0.022117	1_injured_3day_vs_1_injured_9day			Endothelial cells
Rps27a2	1.2426e-06	0.321325	0.227	0.095	0.022465	1_injured_3day_vs_1_injured_9day			Endothelial cells
Efemp14	1.37289e-06	0.507134	0.146	0.046	0.0248205	1_injured_3day_vs_1_injured_9day			Endothelial cells
Fabp53	1.40944e-06	0.887265	0.377	0.217	0.0254814	1_injured_3day_vs_1_injured_9day			Endothelial cells
Rps123	1.56961e-06	0.475408	0.312	0.158	0.0283769	1_injured_3day_vs_1_injured_9day			Endothelial cells
Rpl383	1.69034e-06	0.530761	0.543	0.388	0.0305597	1_injured_3day_vs_1_injured_9day			Endothelial cells
Mef2c2	1.76445e-06	0.784937	0.518	0.342	0.0318996	1_injured_3day_vs_1_injured_9day			Endothelial cells
Dbp2	1.83575e-06	0.557079	0.109	0.027	0.0331885	1_injured_3day_vs_1_injured_9day			Endothelial cells
Lgals15	1.88524e-06	0.355934	0.551	0.375	0.0340832	1_injured_3day_vs_1_injured_9day			Endothelial cells
Gm47071	1.89723e-06	0.357508	0.126	0.034	0.0343001	1_injured_3day_vs_1_injured_9day			Endothelial cells
Gstp14	2.11299e-06	0.443045	0.275	0.133	0.0382008	1_injured_3day_vs_1_injured_9day			Endothelial cells
Gm255381	2.14888e-06	0.376706	0.105	0.025	0.0388496	1_injured_3day_vs_1_injured_9day			Endothelial cells
Igfbp53	2.17291e-06	0.396971	0.316	0.162	0.0392841	1_injured_3day_vs_1_injured_9day			Endothelial cells
Jund3	2.24912e-06	-0.678104	0.538	0.658	0.0406618	1_injured_3day_vs_1_injured_9day			Endothelial cells
Sec623	2.41298e-06	0.482927	0.579	0.392	0.0436242	1_injured_3day_vs_1_injured_9day			Endothelial cells
Spp13	3.81143e-46	-1.81803	0.009	0.429	6.89069e-42	1_uninjured_vs_1_injured_3day			Endothelial cells
Hspb14	2.39832e-41	1.81814	0.874	0.559	4.33592e-37	1_uninjured_vs_1_injured_3day			Endothelial cells
Gm175412	6.87227e-41	-1.98532	0.126	0.575	1.24244e-36	1_uninjured_vs_1_injured_3day			Endothelial cells
Cst32	1.56808e-36	1.28316	0.963	0.814	2.83494e-32	1_uninjured_vs_1_injured_3day			Endothelial cells
Pabpc13	3.99278e-35	-1.27833	0.757	0.891	7.21854e-31	1_uninjured_vs_1_injured_3day			Endothelial cells
Hspa1a2	2.7914e-29	2.35242	0.633	0.219	5.04657e-25	1_uninjured_vs_1_injured_3day			Endothelial cells
Pltp1	8.71249e-28	1.71139	0.661	0.263	1.57513e-23	1_uninjured_vs_1_injured_3day			Endothelial cells
Gsn3	1.8332e-25	1.7131	0.69	0.372	3.31425e-21	1_uninjured_vs_1_injured_3day			Endothelial cells
Ptn3	4.16091e-25	3.1366	0.468	0.105	7.52251e-21	1_uninjured_vs_1_injured_3day			Endothelial cells
Rpsa-ps102	4.37706e-25	-1.56004	0.406	0.704	7.91328e-21	1_uninjured_vs_1_injured_3day			Endothelial cells
Gm102883	5.90782e-24	-1.44456	0.436	0.7	1.06807e-19	1_uninjured_vs_1_injured_3day			Endothelial cells
Bsg1	6.81391e-24	2.08951	0.766	0.538	1.23189e-19	1_uninjured_vs_1_injured_3day			Endothelial cells
Col4a12	3.19897e-23	-1.17684	0.482	0.773	5.78342e-19	1_uninjured_vs_1_injured_3day			Endothelial cells
Rpl9-ps63	4.53337e-23	-1.51458	0.351	0.64	8.19589e-19	1_uninjured_vs_1_injured_3day			Endothelial cells
Rplp02	8.93472e-23	-1.04751	0.757	0.838	1.61531e-18	1_uninjured_vs_1_injured_3day			Endothelial cells
Cldn5	1.65385e-22	2.3494	0.534	0.194	2.98999e-18	1_uninjured_vs_1_injured_3day			Endothelial cells
Timp12	1.87064e-21	-0.829997	0.018	0.247	3.38194e-17	1_uninjured_vs_1_injured_3day			Endothelial cells
Abca12	1.90784e-21	-1.64063	0.122	0.421	3.44919e-17	1_uninjured_vs_1_injured_3day			Endothelial cells
Lyz23	2.36019e-21	-0.945673	0.016	0.243	4.26699e-17	1_uninjured_vs_1_injured_3day			Endothelial cells
Rpl21-ps42	3.45861e-21	-1.46058	0.225	0.522	6.25282e-17	1_uninjured_vs_1_injured_3day			Endothelial cells
Zfp362	1.0597e-20	1.49064	0.787	0.547	1.91583e-16	1_uninjured_vs_1_injured_3day			Endothelial cells
Hspa1b2	1.43964e-20	2.05207	0.518	0.19	2.60272e-16	1_uninjured_vs_1_injured_3day			Endothelial cells
Ctla2a2	5.45084e-20	-1.87464	0.555	0.753	9.85457e-16	1_uninjured_vs_1_injured_3day			Endothelial cells
Rps263	2.1936e-19	-0.829995	0.8	0.87	3.96581e-15	1_uninjured_vs_1_injured_3day			Endothelial cells
Slco1a4	4.56165e-19	2.64221	0.312	0.028	8.24701e-15	1_uninjured_vs_1_injured_3day			Endothelial cells
H192	5.3136e-19	-0.744817	0.011	0.206	9.60646e-15	1_uninjured_vs_1_injured_3day			Endothelial cells
mt-Rnr22	1.45559e-18	0.75115	1	0.955	2.63156e-14	1_uninjured_vs_1_injured_3day			Endothelial cells
Lgals13	2.27237e-18	-1.19573	0.236	0.551	4.10821e-14	1_uninjured_vs_1_injured_3day			Endothelial cells
Btg23	2.59321e-18	1.61496	0.626	0.372	4.68827e-14	1_uninjured_vs_1_injured_3day			Endothelial cells
Eef1b23	2.79972e-18	-0.962414	0.679	0.798	5.06162e-14	1_uninjured_vs_1_injured_3day			Endothelial cells
Sparc2	5.55755e-18	-0.562185	0.959	0.968	1.00475e-13	1_uninjured_vs_1_injured_3day			Endothelial cells
Gm65762	5.87362e-18	-1.32447	0.183	0.466	1.06189e-13	1_uninjured_vs_1_injured_3day			Endothelial cells
2003-06-01	8.06409e-18	1.08979	0.874	0.713	1.45791e-13	1_uninjured_vs_1_injured_3day			Endothelial cells
Spock22	2.15634e-17	2.56201	0.33	0.057	3.89845e-13	1_uninjured_vs_1_injured_3day			Endothelial cells
Gm249512	4.02888e-17	-0.677063	0.039	0.255	7.28381e-13	1_uninjured_vs_1_injured_3day			Endothelial cells
Ddx52	4.04701e-17	0.728322	0.876	0.741	7.3166e-13	1_uninjured_vs_1_injured_3day			Endothelial cells
Cenpq2	1.05286e-16	-1.04303	0.085	0.332	1.90347e-12	1_uninjured_vs_1_injured_3day			Endothelial cells
Gm224262	1.1099e-16	-1.06161	0.174	0.457	2.00658e-12	1_uninjured_vs_1_injured_3day			Endothelial cells
Ubc2	1.22615e-16	1.07819	0.798	0.648	2.21676e-12	1_uninjured_vs_1_injured_3day			Endothelial cells
Fos3	1.72442e-16	1.42256	0.794	0.648	3.11758e-12	1_uninjured_vs_1_injured_3day			Endothelial cells
Gm102753	3.83498e-16	-1.26284	0.365	0.595	6.93326e-12	1_uninjured_vs_1_injured_3day			Endothelial cells
Tgfbi2	4.41057e-16	-1.00244	0.073	0.304	7.97387e-12	1_uninjured_vs_1_injured_3day			Endothelial cells
Cxcl12	1.05011e-15	0.869052	0.791	0.555	1.8985e-11	1_uninjured_vs_1_injured_3day			Endothelial cells
Junb3	1.22774e-15	1.19092	0.773	0.587	2.21963e-11	1_uninjured_vs_1_injured_3day			Endothelial cells
Fblim13	1.30628e-15	-0.996563	0.05	0.263	2.36163e-11	1_uninjured_vs_1_injured_3day			Endothelial cells
Gm174302	1.5954e-15	-0.991775	0.156	0.425	2.88433e-11	1_uninjured_vs_1_injured_3day			Endothelial cells
Rps10-ps12	1.65528e-15	-1.04709	0.583	0.721	2.99258e-11	1_uninjured_vs_1_injured_3day			Endothelial cells
Mt13	2.12612e-15	1.7348	0.55	0.296	3.84381e-11	1_uninjured_vs_1_injured_3day			Endothelial cells
Gm102633	2.51442e-15	-1.31691	0.475	0.652	4.54582e-11	1_uninjured_vs_1_injured_3day			Endothelial cells
Mest3	2.97805e-15	-1.11637	0.041	0.239	5.38402e-11	1_uninjured_vs_1_injured_3day			Endothelial cells
Gm39402	6.44278e-15	-1.06654	0.266	0.522	1.16479e-10	1_uninjured_vs_1_injured_3day			Endothelial cells
Ccl23	6.65252e-15	-0.766937	0.028	0.206	1.20271e-10	1_uninjured_vs_1_injured_3day			Endothelial cells
Gm225822	7.24724e-15	-0.713657	0.039	0.235	1.31023e-10	1_uninjured_vs_1_injured_3day			Endothelial cells
Gm100733	1.5203e-14	-1.08414	0.353	0.587	2.74855e-10	1_uninjured_vs_1_injured_3day			Endothelial cells
Gm230612	1.54212e-14	-0.55068	0.032	0.215	2.78801e-10	1_uninjured_vs_1_injured_3day			Endothelial cells
Gas62	1.79033e-14	1.19977	0.509	0.263	3.23673e-10	1_uninjured_vs_1_injured_3day			Endothelial cells
Sptbn11	2.11437e-14	0.674946	0.869	0.733	3.82257e-10	1_uninjured_vs_1_injured_3day			Endothelial cells
Dusp14	2.21251e-14	1.17841	0.679	0.49	4.00001e-10	1_uninjured_vs_1_injured_3day			Endothelial cells
Rpsa3	2.80625e-14	-1.09935	0.58	0.721	5.07343e-10	1_uninjured_vs_1_injured_3day			Endothelial cells
Col18a12	3.84622e-14	-1.04231	0.174	0.429	6.95359e-10	1_uninjured_vs_1_injured_3day			Endothelial cells
Gm255952	4.84243e-14	-0.561696	0.023	0.19	8.75462e-10	1_uninjured_vs_1_injured_3day			Endothelial cells
Gm248652	5.08025e-14	-0.623763	0.039	0.223	9.18458e-10	1_uninjured_vs_1_injured_3day			Endothelial cells
Slc9a3r2	7.17302e-14	1.1147	0.64	0.401	1.29681e-09	1_uninjured_vs_1_injured_3day			Endothelial cells
Rpl13-ps32	7.84863e-14	-1.02008	0.452	0.656	1.41895e-09	1_uninjured_vs_1_injured_3day			Endothelial cells
Gm52442	1.10236e-13	-0.822583	0.062	0.263	1.99295e-09	1_uninjured_vs_1_injured_3day			Endothelial cells
Tnc3	1.21538e-13	-0.477394	0.009	0.15	2.19729e-09	1_uninjured_vs_1_injured_3day			Endothelial cells
Vim3	1.52767e-13	-0.779303	0.784	0.862	2.76187e-09	1_uninjured_vs_1_injured_3day			Endothelial cells
Timp32	1.60291e-13	0.718314	0.78	0.579	2.8979e-09	1_uninjured_vs_1_injured_3day			Endothelial cells
Cxcl21	1.86909e-13	-0.440575	0.007	0.142	3.37913e-09	1_uninjured_vs_1_injured_3day			Endothelial cells
Ly6c12	2.12203e-13	0.829922	0.862	0.684	3.83641e-09	1_uninjured_vs_1_injured_3day			Endothelial cells
Dcn2	2.21591e-13	1.03921	0.743	0.543	4.00614e-09	1_uninjured_vs_1_injured_3day			Endothelial cells
Postn3	2.24045e-13	-0.904907	0.069	0.271	4.05051e-09	1_uninjured_vs_1_injured_3day			Endothelial cells
Atf33	3.40635e-13	1.85723	0.443	0.198	6.15834e-09	1_uninjured_vs_1_injured_3day			Endothelial cells
Gm150132	3.69548e-13	-0.694014	0.119	0.352	6.68106e-09	1_uninjured_vs_1_injured_3day			Endothelial cells
Cav22	3.76859e-13	0.984543	0.564	0.332	6.81323e-09	1_uninjured_vs_1_injured_3day			Endothelial cells
Abcb1a	4.42934e-13	1.7984	0.571	0.381	8.00781e-09	1_uninjured_vs_1_injured_3day			Endothelial cells
Col4a22	5.03931e-13	-1.06474	0.411	0.644	9.11057e-09	1_uninjured_vs_1_injured_3day			Endothelial cells
Klf22	6.23677e-13	0.995843	0.716	0.494	1.12754e-08	1_uninjured_vs_1_injured_3day			Endothelial cells
Mfsd2a	1.07225e-12	1.55061	0.234	0.028	1.93851e-08	1_uninjured_vs_1_injured_3day			Endothelial cells
Gadd45g3	1.07718e-12	1.74298	0.557	0.372	1.94744e-08	1_uninjured_vs_1_injured_3day			Endothelial cells
Nid12	1.12001e-12	-0.898863	0.193	0.453	2.02487e-08	1_uninjured_vs_1_injured_3day			Endothelial cells
Pdlim13	1.65391e-12	-1.04572	0.298	0.563	2.99011e-08	1_uninjured_vs_1_injured_3day			Endothelial cells
Top2a1	1.96997e-12	-0.973655	0	0.109	3.56151e-08	1_uninjured_vs_1_injured_3day			Endothelial cells
Gda2	2.18296e-12	-1.27389	0.234	0.474	3.94657e-08	1_uninjured_vs_1_injured_3day			Endothelial cells
1500012F01Rik3	2.36059e-12	-1.06525	0.287	0.518	4.2677e-08	1_uninjured_vs_1_injured_3day			Endothelial cells
Fam167b	2.48966e-12	-1.0856	0.087	0.296	4.50106e-08	1_uninjured_vs_1_injured_3day			Endothelial cells
Gm119832	2.49779e-12	-0.480742	0.028	0.182	4.51576e-08	1_uninjured_vs_1_injured_3day			Endothelial cells
Rpl52	2.80855e-12	-0.430442	0.046	0.223	5.07757e-08	1_uninjured_vs_1_injured_3day			Endothelial cells
Ly6e2	3.89995e-12	0.604265	0.92	0.814	7.05072e-08	1_uninjured_vs_1_injured_3day			Endothelial cells
Rpl393	4.85805e-12	-0.727965	0.773	0.838	8.78286e-08	1_uninjured_vs_1_injured_3day			Endothelial cells
Egr13	5.06409e-12	1.00567	0.757	0.571	9.15537e-08	1_uninjured_vs_1_injured_3day			Endothelial cells
Gm93962	6.10698e-12	-0.434374	0.014	0.146	1.10408e-07	1_uninjured_vs_1_injured_3day			Endothelial cells
Lrg1	6.35137e-12	-0.982591	0.365	0.623	1.14826e-07	1_uninjured_vs_1_injured_3day			Endothelial cells
Thbs12	6.41171e-12	-0.90422	0.087	0.287	1.15917e-07	1_uninjured_vs_1_injured_3day			Endothelial cells
Apoe3	7.56799e-12	1.09024	0.725	0.591	1.36822e-07	1_uninjured_vs_1_injured_3day			Endothelial cells
Gm61332	8.74947e-12	-0.513168	0.064	0.251	1.58182e-07	1_uninjured_vs_1_injured_3day			Endothelial cells
Cdk11	1.18261e-11	-0.467692	0.005	0.117	2.13804e-07	1_uninjured_vs_1_injured_3day			Endothelial cells
Aprt2	1.37444e-11	-0.883101	0.133	0.348	2.48485e-07	1_uninjured_vs_1_injured_3day			Endothelial cells
Rps203	1.52027e-11	-0.571375	0.867	0.887	2.7485e-07	1_uninjured_vs_1_injured_3day			Endothelial cells
Gm20002	1.72354e-11	-1.04125	0.321	0.534	3.11598e-07	1_uninjured_vs_1_injured_3day			Endothelial cells
Marcksl13	1.82944e-11	-0.49718	0.014	0.142	3.30744e-07	1_uninjured_vs_1_injured_3day			Endothelial cells
Ctsb2	1.90819e-11	-0.84561	0.498	0.688	3.44982e-07	1_uninjured_vs_1_injured_3day			Endothelial cells
Mpz2	1.97873e-11	1.10738	0.181	0.008	3.57735e-07	1_uninjured_vs_1_injured_3day			Endothelial cells
Mki672	2.02118e-11	-0.965254	0.007	0.121	3.65409e-07	1_uninjured_vs_1_injured_3day			Endothelial cells
Rps4x3	2.05641e-11	-0.809916	0.688	0.781	3.71778e-07	1_uninjured_vs_1_injured_3day			Endothelial cells
Rps3a22	2.10303e-11	-0.72413	0.071	0.255	3.80207e-07	1_uninjured_vs_1_injured_3day			Endothelial cells
Cthrc13	2.35392e-11	-0.716147	0.067	0.247	4.25565e-07	1_uninjured_vs_1_injured_3day			Endothelial cells
Hes12	2.54965e-11	1.2352	0.406	0.182	4.60952e-07	1_uninjured_vs_1_injured_3day			Endothelial cells
Ephx1	2.57246e-11	0.897736	0.342	0.117	4.65074e-07	1_uninjured_vs_1_injured_3day			Endothelial cells
Birc52	3.19156e-11	-0.500572	0.011	0.134	5.77003e-07	1_uninjured_vs_1_injured_3day			Endothelial cells
S100a63	3.74825e-11	-0.749799	0.573	0.749	6.77646e-07	1_uninjured_vs_1_injured_3day			Endothelial cells
Fn13	3.92898e-11	-0.903693	0.287	0.522	7.10321e-07	1_uninjured_vs_1_injured_3day			Endothelial cells
8430408G22Rik	4.34248e-11	1.23722	0.557	0.344	7.85077e-07	1_uninjured_vs_1_injured_3day			Endothelial cells
Gnb2l12	4.52862e-11	-0.761071	0.791	0.846	8.1873e-07	1_uninjured_vs_1_injured_3day			Endothelial cells
Gm84442	7.25938e-11	-0.987457	0.289	0.498	1.31242e-06	1_uninjured_vs_1_injured_3day			Endothelial cells
Rps26-ps13	7.59591e-11	-0.859075	0.617	0.721	1.37326e-06	1_uninjured_vs_1_injured_3day			Endothelial cells
2810417H13Rik1	8.26366e-11	-0.593425	0.002	0.101	1.49399e-06	1_uninjured_vs_1_injured_3day			Endothelial cells
Slc7a5	8.93739e-11	1.22662	0.19	0.02	1.61579e-06	1_uninjured_vs_1_injured_3day			Endothelial cells
Gm227592	9.60661e-11	-0.564119	0.101	0.296	1.73678e-06	1_uninjured_vs_1_injured_3day			Endothelial cells
Egfl72	9.75385e-11	0.532744	0.913	0.765	1.7634e-06	1_uninjured_vs_1_injured_3day			Endothelial cells
Gm100762	1.06661e-10	-0.667928	0.663	0.765	1.92833e-06	1_uninjured_vs_1_injured_3day			Endothelial cells
Prom1	1.36112e-10	1.48173	0.335	0.134	2.46076e-06	1_uninjured_vs_1_injured_3day			Endothelial cells
Id12	1.67784e-10	1.28595	0.482	0.267	3.03337e-06	1_uninjured_vs_1_injured_3day			Endothelial cells
1110038B12Rik2	2.16804e-10	-0.898091	0.108	0.296	3.91959e-06	1_uninjured_vs_1_injured_3day			Endothelial cells
Fstl12	2.46438e-10	-1.00075	0.358	0.587	4.45535e-06	1_uninjured_vs_1_injured_3day			Endothelial cells
Rpl342	2.61892e-10	-0.875489	0.592	0.688	4.73475e-06	1_uninjured_vs_1_injured_3day			Endothelial cells
Gm56112	2.77477e-10	-0.291104	0.032	0.174	5.01651e-06	1_uninjured_vs_1_injured_3day			Endothelial cells
Ier33	2.87606e-10	1.20893	0.617	0.437	5.19964e-06	1_uninjured_vs_1_injured_3day			Endothelial cells
Sat12	3.30476e-10	1.1693	0.64	0.486	5.97467e-06	1_uninjured_vs_1_injured_3day			Endothelial cells
Myl62	3.90535e-10	0.681466	0.693	0.538	7.06047e-06	1_uninjured_vs_1_injured_3day			Endothelial cells
Ckap42	5.01483e-10	-0.93263	0.133	0.336	9.0663e-06	1_uninjured_vs_1_injured_3day			Endothelial cells
Rpl13a-ps12	5.04531e-10	-0.976698	0.275	0.478	9.12142e-06	1_uninjured_vs_1_injured_3day			Endothelial cells
Rps32	5.08008e-10	-0.546215	0.894	0.883	9.18428e-06	1_uninjured_vs_1_injured_3day			Endothelial cells
S100a43	5.13996e-10	-0.617146	0.064	0.227	9.29253e-06	1_uninjured_vs_1_injured_3day			Endothelial cells
Abcg1	6.27154e-10	-0.502867	0.083	0.267	1.13383e-05	1_uninjured_vs_1_injured_3day			Endothelial cells
Gchfr	6.5148e-10	-0.703789	0.03	0.162	1.17781e-05	1_uninjured_vs_1_injured_3day			Endothelial cells
Thy12	6.55079e-10	-0.452906	0.03	0.162	1.18432e-05	1_uninjured_vs_1_injured_3day			Endothelial cells
Lgmn2	6.93697e-10	-0.953601	0.266	0.478	1.25413e-05	1_uninjured_vs_1_injured_3day			Endothelial cells
Csrp22	8.2526e-10	-0.68146	0.186	0.393	1.49199e-05	1_uninjured_vs_1_injured_3day			Endothelial cells
Rpl21-ps62	1.10434e-09	-0.425191	0.041	0.182	1.99653e-05	1_uninjured_vs_1_injured_3day			Endothelial cells
Spats22	1.35948e-09	-0.447481	0.028	0.154	2.4578e-05	1_uninjured_vs_1_injured_3day			Endothelial cells
Bhlhe40	1.36265e-09	1.09396	0.282	0.097	2.46353e-05	1_uninjured_vs_1_injured_3day			Endothelial cells
Tpm3-rs73	1.41572e-09	-1.06438	0.411	0.575	2.55949e-05	1_uninjured_vs_1_injured_3day			Endothelial cells
Clu2	1.57051e-09	0.862774	0.571	0.36	2.83933e-05	1_uninjured_vs_1_injured_3day			Endothelial cells
Ier23	1.86346e-09	0.924644	0.679	0.526	3.36894e-05	1_uninjured_vs_1_injured_3day			Endothelial cells
Gm23192	2.07418e-09	-0.507147	0.011	0.113	3.7499e-05	1_uninjured_vs_1_injured_3day			Endothelial cells
Rps83	2.40658e-09	-0.653629	0.716	0.773	4.35086e-05	1_uninjured_vs_1_injured_3day			Endothelial cells
Slc2a1	2.47121e-09	1.51431	0.372	0.186	4.4677e-05	1_uninjured_vs_1_injured_3day			Endothelial cells
Mal	2.48111e-09	1.50446	0.312	0.121	4.4856e-05	1_uninjured_vs_1_injured_3day			Endothelial cells
Ppic2	2.68929e-09	-0.7353	0.335	0.543	4.86196e-05	1_uninjured_vs_1_injured_3day			Endothelial cells
Npm13	2.77586e-09	-0.849915	0.463	0.623	5.01849e-05	1_uninjured_vs_1_injured_3day			Endothelial cells
Klf43	2.98122e-09	0.830316	0.626	0.441	5.38975e-05	1_uninjured_vs_1_injured_3day			Endothelial cells
Upp1	3.29825e-09	-0.4349	0.08	0.247	5.96291e-05	1_uninjured_vs_1_injured_3day			Endothelial cells
Fmo23	3.74313e-09	0.841693	0.445	0.251	6.7672e-05	1_uninjured_vs_1_injured_3day			Endothelial cells
Tspan13	3.84323e-09	0.62679	0.764	0.623	6.94818e-05	1_uninjured_vs_1_injured_3day			Endothelial cells
Lmnb1	3.95994e-09	-0.601096	0.023	0.138	7.15917e-05	1_uninjured_vs_1_injured_3day			Endothelial cells
Fbn12	4.06136e-09	-0.794759	0.186	0.393	7.34254e-05	1_uninjured_vs_1_injured_3day			Endothelial cells
Sox43	4.3363e-09	-1.37759	0.147	0.324	7.83959e-05	1_uninjured_vs_1_injured_3day			Endothelial cells
Fth11	4.37484e-09	0.411308	0.947	0.891	7.90928e-05	1_uninjured_vs_1_injured_3day			Endothelial cells
Gm240982	5.07294e-09	-0.28831	0.021	0.134	9.17136e-05	1_uninjured_vs_1_injured_3day			Endothelial cells
Smc22	5.20599e-09	-0.704355	0.064	0.219	9.41191e-05	1_uninjured_vs_1_injured_3day			Endothelial cells
Sparcl13	5.363e-09	0.553528	0.927	0.822	9.69577e-05	1_uninjured_vs_1_injured_3day			Endothelial cells
Ptpn18	6.3521e-09	-0.848595	0.158	0.344	0.00011484	1_uninjured_vs_1_injured_3day			Endothelial cells
Gm102603	6.74155e-09	-0.682454	0.647	0.721	0.000121881	1_uninjured_vs_1_injured_3day			Endothelial cells
Dnajb15	6.77767e-09	1.18478	0.399	0.211	0.000122534	1_uninjured_vs_1_injured_3day			Endothelial cells
Gm175112	7.04412e-09	-0.627172	0.122	0.296	0.000127351	1_uninjured_vs_1_injured_3day			Endothelial cells
Gm54592	7.28141e-09	-0.351781	0.011	0.109	0.000131641	1_uninjured_vs_1_injured_3day			Endothelial cells
Scd21	8.5898e-09	-0.738341	0.243	0.449	0.000155295	1_uninjured_vs_1_injured_3day			Endothelial cells
Efemp13	9.4382e-09	-0.543225	0.028	0.146	0.000170633	1_uninjured_vs_1_injured_3day			Endothelial cells
Col6a32	1.25181e-08	-0.550653	0.085	0.247	0.000226315	1_uninjured_vs_1_injured_3day			Endothelial cells
Atpif12	1.45932e-08	-0.814265	0.39	0.579	0.000263831	1_uninjured_vs_1_injured_3day			Endothelial cells
Rpl9-ps11	1.52319e-08	-0.595238	0.11	0.279	0.000275377	1_uninjured_vs_1_injured_3day			Endothelial cells
Gm100363	1.7995e-08	-0.697145	0.138	0.32	0.000325332	1_uninjured_vs_1_injured_3day			Endothelial cells
Car4	1.83573e-08	1.64486	0.25	0.085	0.000331882	1_uninjured_vs_1_injured_3day			Endothelial cells
Col1a1	1.88277e-08	-0.532397	0.369	0.547	0.000340385	1_uninjured_vs_1_injured_3day			Endothelial cells
Cd14	1.99733e-08	-0.998224	0.112	0.283	0.000361097	1_uninjured_vs_1_injured_3day			Endothelial cells
Lcn2	2.02369e-08	0.989075	0.19	0.04	0.000365863	1_uninjured_vs_1_injured_3day			Endothelial cells
Vcan3	2.11922e-08	-0.587154	0.044	0.17	0.000383133	1_uninjured_vs_1_injured_3day			Endothelial cells
Pcp4l1	2.19245e-08	1.19683	0.399	0.215	0.000396373	1_uninjured_vs_1_injured_3day			Endothelial cells
Gm48251	2.283e-08	-0.428962	0.028	0.142	0.000412744	1_uninjured_vs_1_injured_3day			Endothelial cells
C130074G19Rik	2.35097e-08	0.689918	0.647	0.482	0.000425031	1_uninjured_vs_1_injured_3day			Endothelial cells
Slc3a22	2.4339e-08	0.9271	0.534	0.381	0.000440024	1_uninjured_vs_1_injured_3day			Endothelial cells
Slc39a8	2.81074e-08	1.46198	0.317	0.146	0.000508155	1_uninjured_vs_1_injured_3day			Endothelial cells
Rpl362	3.11986e-08	0.7327	0.567	0.409	0.00056404	1_uninjured_vs_1_injured_3day			Endothelial cells
C1qtnf9	3.39805e-08	0.909821	0.5	0.316	0.000614333	1_uninjured_vs_1_injured_3day			Endothelial cells
Gm227612	3.88479e-08	-0.667727	0.211	0.405	0.000702331	1_uninjured_vs_1_injured_3day			Endothelial cells
Gm49682	4.05231e-08	-0.470299	0.085	0.239	0.000732617	1_uninjured_vs_1_injured_3day			Endothelial cells
Rpl28-ps4	4.84249e-08	-0.330808	0.011	0.101	0.000875474	1_uninjured_vs_1_injured_3day			Endothelial cells
Rpl323	4.95011e-08	-0.505002	0.853	0.887	0.000894931	1_uninjured_vs_1_injured_3day			Endothelial cells
Gm94932	5.30411e-08	-0.634857	0.186	0.377	0.00095893	1_uninjured_vs_1_injured_3day			Endothelial cells
Malat13	5.32194e-08	0.395692	0.993	0.947	0.000962154	1_uninjured_vs_1_injured_3day			Endothelial cells
Clic5	5.34076e-08	0.943212	0.298	0.117	0.000965556	1_uninjured_vs_1_injured_3day			Endothelial cells
Gm52772	5.41662e-08	-0.507694	0.05	0.178	0.000979271	1_uninjured_vs_1_injured_3day			Endothelial cells
Rpl10-ps32	5.73901e-08	-0.699899	0.144	0.32	0.00103756	1_uninjured_vs_1_injured_3day			Endothelial cells
Tmem252	5.95465e-08	-0.649394	0.264	0.474	0.00107654	1_uninjured_vs_1_injured_3day			Endothelial cells
Lpp2	6.18326e-08	-0.74162	0.122	0.291	0.00111787	1_uninjured_vs_1_injured_3day			Endothelial cells
Amdhd2	6.35836e-08	-0.276639	0.014	0.105	0.00114953	1_uninjured_vs_1_injured_3day			Endothelial cells
Lox2	6.86311e-08	-0.365823	0.044	0.166	0.00124078	1_uninjured_vs_1_injured_3day			Endothelial cells
Gm42042	7.28382e-08	-0.718251	0.2	0.381	0.00131684	1_uninjured_vs_1_injured_3day			Endothelial cells
Aplnr	7.37885e-08	-0.714733	0.167	0.352	0.00133402	1_uninjured_vs_1_injured_3day			Endothelial cells
Bmx	7.55338e-08	1.29425	0.243	0.085	0.00136557	1_uninjured_vs_1_injured_3day			Endothelial cells
Rps6ka32	7.83599e-08	-0.512885	0.131	0.3	0.00141667	1_uninjured_vs_1_injured_3day			Endothelial cells
Serpina3g	7.92011e-08	-0.643013	0.025	0.13	0.00143188	1_uninjured_vs_1_injured_3day			Endothelial cells
B230369F24Rik2	7.94946e-08	-0.371324	0.016	0.109	0.00143718	1_uninjured_vs_1_injured_3day			Endothelial cells
Ppp1r15a3	8.33662e-08	0.69584	0.482	0.291	0.00150718	1_uninjured_vs_1_injured_3day			Endothelial cells
Eif1	9.71934e-08	0.583774	0.768	0.623	0.00175716	1_uninjured_vs_1_injured_3day			Endothelial cells
Pllp	9.86936e-08	0.751914	0.14	0.016	0.00178428	1_uninjured_vs_1_injured_3day			Endothelial cells
Cd812	1.05417e-07	0.555651	0.755	0.595	0.00190583	1_uninjured_vs_1_injured_3day			Endothelial cells
Jund2	1.17195e-07	0.59992	0.697	0.538	0.00211877	1_uninjured_vs_1_injured_3day			Endothelial cells
Mrpl451	1.22276e-07	-0.437548	0.055	0.186	0.00221064	1_uninjured_vs_1_injured_3day			Endothelial cells
Gm227602	1.28479e-07	-0.296525	0.021	0.117	0.00232278	1_uninjured_vs_1_injured_3day			Endothelial cells
Csf2rb	1.28647e-07	-0.705835	0.257	0.453	0.00232581	1_uninjured_vs_1_injured_3day			Endothelial cells
Rabac13	1.28859e-07	0.717592	0.548	0.405	0.00232964	1_uninjured_vs_1_injured_3day			Endothelial cells
Lrrc583	1.33033e-07	-0.74454	0.658	0.729	0.0024051	1_uninjured_vs_1_injured_3day			Endothelial cells
Cks1b2	1.38665e-07	-0.361211	0.039	0.154	0.00250692	1_uninjured_vs_1_injured_3day			Endothelial cells
Net1	1.55755e-07	1.01886	0.374	0.219	0.00281589	1_uninjured_vs_1_injured_3day			Endothelial cells
Cmah	1.56013e-07	-0.906836	0.018	0.109	0.00282056	1_uninjured_vs_1_injured_3day			Endothelial cells
Gm127281	1.62111e-07	-0.559987	0.085	0.231	0.00293081	1_uninjured_vs_1_injured_3day			Endothelial cells
Arl4d	1.6311e-07	0.857738	0.216	0.065	0.00294887	1_uninjured_vs_1_injured_3day			Endothelial cells
AW1120101	1.674e-07	0.71787	0.491	0.304	0.00302643	1_uninjured_vs_1_injured_3day			Endothelial cells
Axin2	1.74236e-07	0.595279	0.128	0.012	0.00315	1_uninjured_vs_1_injured_3day			Endothelial cells
Top1	2.04309e-07	-0.721132	0.424	0.607	0.00369371	1_uninjured_vs_1_injured_3day			Endothelial cells
Itih52	2.13543e-07	0.975333	0.397	0.231	0.00386064	1_uninjured_vs_1_injured_3day			Endothelial cells
Rpl112	2.38315e-07	-0.802015	0.436	0.575	0.0043085	1_uninjured_vs_1_injured_3day			Endothelial cells
Mbp	2.39979e-07	0.686617	0.11	0.004	0.00433859	1_uninjured_vs_1_injured_3day			Endothelial cells
S100a113	2.45117e-07	-0.850973	0.475	0.615	0.00443147	1_uninjured_vs_1_injured_3day			Endothelial cells
Cdk42	2.51841e-07	-0.474991	0.209	0.389	0.00455303	1_uninjured_vs_1_injured_3day			Endothelial cells
Cadm1	2.60265e-07	0.653058	0.142	0.02	0.00470532	1_uninjured_vs_1_injured_3day			Endothelial cells
Aldh22	2.60908e-07	0.75997	0.489	0.324	0.00471696	1_uninjured_vs_1_injured_3day			Endothelial cells
Cd443	2.67571e-07	-0.508627	0.018	0.109	0.00483742	1_uninjured_vs_1_injured_3day			Endothelial cells
Nr4a13	2.6926e-07	1.00184	0.438	0.279	0.00486795	1_uninjured_vs_1_injured_3day			Endothelial cells
Golm12	2.69913e-07	-0.660174	0.19	0.372	0.00487975	1_uninjured_vs_1_injured_3day			Endothelial cells
Rps183	2.92532e-07	-0.620723	0.216	0.385	0.00528869	1_uninjured_vs_1_injured_3day			Endothelial cells
Casp31	2.97271e-07	-0.284533	0.028	0.13	0.00537437	1_uninjured_vs_1_injured_3day			Endothelial cells
Pxdn3	3.34425e-07	-0.74945	0.22	0.405	0.00604607	1_uninjured_vs_1_injured_3day			Endothelial cells
Rpl223	3.68152e-07	-0.42409	0.782	0.818	0.00665582	1_uninjured_vs_1_injured_3day			Endothelial cells
Rps243	3.83604e-07	-0.421666	0.885	0.891	0.00693518	1_uninjured_vs_1_injured_3day			Endothelial cells
Gm82252	3.97987e-07	-0.543698	0.057	0.178	0.0071952	1_uninjured_vs_1_injured_3day			Endothelial cells
Clca1	4.19692e-07	-0.966254	0.112	0.255	0.00758761	1_uninjured_vs_1_injured_3day			Endothelial cells
Il1r13	4.97582e-07	-0.608154	0.094	0.239	0.00899578	1_uninjured_vs_1_injured_3day			Endothelial cells
2200002D01Rik	5.09396e-07	-0.980802	0.218	0.381	0.00920938	1_uninjured_vs_1_injured_3day			Endothelial cells
Col14a13	5.69391e-07	-0.387733	0.032	0.134	0.010294	1_uninjured_vs_1_injured_3day			Endothelial cells
Adh1	6.55976e-07	0.783256	0.19	0.057	0.0118594	1_uninjured_vs_1_injured_3day			Endothelial cells
2410006H16Rik2	6.88553e-07	-0.889741	0.312	0.474	0.0124483	1_uninjured_vs_1_injured_3day			Endothelial cells
Mir6822	6.96213e-07	-0.742129	0.312	0.47	0.0125868	1_uninjured_vs_1_injured_3day			Endothelial cells
Grb14	7.38352e-07	0.915303	0.165	0.04	0.0133487	1_uninjured_vs_1_injured_3day			Endothelial cells
Rpl35a2	7.69368e-07	-0.695814	0.44	0.579	0.0139094	1_uninjured_vs_1_injured_3day			Endothelial cells
Dpysl33	9.57487e-07	-0.627748	0.117	0.263	0.0173104	1_uninjured_vs_1_injured_3day			Endothelial cells
Hsp90aa13	9.76558e-07	0.769785	0.596	0.445	0.0176552	1_uninjured_vs_1_injured_3day			Endothelial cells
A430105I19Rik	9.98976e-07	-0.487415	0.03	0.126	0.0180605	1_uninjured_vs_1_injured_3day			Endothelial cells
Tmem2453	1.06278e-06	-0.950138	0.218	0.389	0.019214	1_uninjured_vs_1_injured_3day			Endothelial cells
Slc31a13	1.1562e-06	-0.485564	0.041	0.146	0.020903	1_uninjured_vs_1_injured_3day			Endothelial cells
Incenp2	1.36778e-06	-0.466088	0.021	0.105	0.024728	1_uninjured_vs_1_injured_3day			Endothelial cells
Rgs16	1.37924e-06	0.989055	0.264	0.113	0.0249352	1_uninjured_vs_1_injured_3day			Endothelial cells
Rpl232	1.41111e-06	-0.485519	0.787	0.814	0.0255114	1_uninjured_vs_1_injured_3day			Endothelial cells
Ehd4	1.45058e-06	-0.471748	0.638	0.781	0.026225	1_uninjured_vs_1_injured_3day			Endothelial cells
Uqcrh2	1.51073e-06	-0.707538	0.516	0.632	0.0273126	1_uninjured_vs_1_injured_3day			Endothelial cells
Esam	1.55253e-06	0.464659	0.803	0.68	0.0280681	1_uninjured_vs_1_injured_3day			Endothelial cells
C1qtnf63	1.60721e-06	-0.390688	0.023	0.109	0.0290568	1_uninjured_vs_1_injured_3day			Endothelial cells
Trib12	1.60818e-06	-0.392135	0.067	0.186	0.0290742	1_uninjured_vs_1_injured_3day			Endothelial cells
Gm10175	1.64899e-06	-0.394853	0.023	0.109	0.0298121	1_uninjured_vs_1_injured_3day			Endothelial cells
Gpx73	1.68229e-06	-0.346089	0.046	0.154	0.0304141	1_uninjured_vs_1_injured_3day			Endothelial cells
Ccnd23	1.72471e-06	0.615235	0.378	0.206	0.031181	1_uninjured_vs_1_injured_3day			Endothelial cells
Rpl63	1.79595e-06	-0.627085	0.612	0.709	0.032469	1_uninjured_vs_1_injured_3day			Endothelial cells
Sept113	2.07332e-06	-0.736347	0.161	0.316	0.0374835	1_uninjured_vs_1_injured_3day			Endothelial cells
Maoa	2.19904e-06	0.988065	0.321	0.174	0.0397565	1_uninjured_vs_1_injured_3day			Endothelial cells
Eogt	2.20539e-06	0.852796	0.296	0.15	0.0398713	1_uninjured_vs_1_injured_3day			Endothelial cells
Gm51602	2.25193e-06	-0.6857	0.275	0.437	0.0407126	1_uninjured_vs_1_injured_3day			Endothelial cells
2700094K13Rik2	2.34425e-06	-0.657202	0.151	0.3	0.0423817	1_uninjured_vs_1_injured_3day			Endothelial cells
Atp1a13	2.45384e-06	-0.529483	0.211	0.377	0.0443629	1_uninjured_vs_1_injured_3day			Endothelial cells
Cst33	1.43449e-83	1.93214	0.963	0.662	2.59342e-79	1_uninjured_vs_1_injured_9day			Endothelial cells
Gsn4	1.88378e-65	2.05711	0.69	0.188	3.40569e-61	1_uninjured_vs_1_injured_9day			Endothelial cells
Cxcl121	2.41299e-59	2.1973	0.791	0.34	4.36244e-55	1_uninjured_vs_1_injured_9day			Endothelial cells
Pltp2	6.63231e-59	2.17844	0.661	0.186	1.19906e-54	1_uninjured_vs_1_injured_9day			Endothelial cells
Hspb15	1.34542e-44	1.37672	0.874	0.614	2.43238e-40	1_uninjured_vs_1_injured_9day			Endothelial cells
Ly6c13	1.11577e-41	1.38616	0.862	0.587	2.01721e-37	1_uninjured_vs_1_injured_9day			Endothelial cells
Timp33	4.08972e-41	1.23843	0.78	0.413	7.39381e-37	1_uninjured_vs_1_injured_9day			Endothelial cells
Mt14	8.95819e-40	1.89107	0.55	0.165	1.61955e-35	1_uninjured_vs_1_injured_9day			Endothelial cells
Dcn3	3.37357e-39	1.01543	0.743	0.399	6.09908e-35	1_uninjured_vs_1_injured_9day			Endothelial cells
Lrg11	1.4604e-37	-1.42096	0.365	0.755	2.64026e-33	1_uninjured_vs_1_injured_9day			Endothelial cells
Cldn51	1.43806e-36	2.41667	0.534	0.198	2.59987e-32	1_uninjured_vs_1_injured_9day			Endothelial cells
Hbb-bs4	1.10541e-32	-0.269297	0.537	0.171	1.99847e-28	1_uninjured_vs_1_injured_9day			Endothelial cells
Abca13	2.48149e-31	-1.80596	0.122	0.441	4.48629e-27	1_uninjured_vs_1_injured_9day			Endothelial cells
Gas63	1.05779e-30	1.33647	0.509	0.179	1.91238e-26	1_uninjured_vs_1_injured_9day			Endothelial cells
Bsg2	1.12573e-29	1.93474	0.766	0.597	2.0352e-25	1_uninjured_vs_1_injured_9day			Endothelial cells
Ephx11	3.43707e-29	1.08838	0.342	0.061	6.21388e-25	1_uninjured_vs_1_injured_9day			Endothelial cells
Pabpc14	7.47077e-29	-0.936161	0.757	0.837	1.35064e-24	1_uninjured_vs_1_injured_9day			Endothelial cells
Car41	1.99196e-28	2.23692	0.25	0.017	3.60126e-24	1_uninjured_vs_1_injured_9day			Endothelial cells
Ly6e3	2.19322e-28	0.803959	0.92	0.736	3.96512e-24	1_uninjured_vs_1_injured_9day			Endothelial cells
Rpl363	2.64626e-28	1.22373	0.567	0.278	4.78418e-24	1_uninjured_vs_1_injured_9day			Endothelial cells
Ctla2a3	3.09831e-28	-1.77735	0.555	0.738	5.60143e-24	1_uninjured_vs_1_injured_9day			Endothelial cells
Clca11	1.68648e-27	-1.86677	0.112	0.411	3.04898e-23	1_uninjured_vs_1_injured_9day			Endothelial cells
Slc9a3r21	2.98499e-27	1.22667	0.64	0.329	5.39657e-23	1_uninjured_vs_1_injured_9day			Endothelial cells
Wdr893	9.08224e-27	0.788987	0.814	0.624	1.64198e-22	1_uninjured_vs_1_injured_9day			Endothelial cells
Hspa1b3	1.6293e-26	1.6302	0.518	0.221	2.94561e-22	1_uninjured_vs_1_injured_9day			Endothelial cells
Fmo24	1.63407e-26	1.16177	0.445	0.141	2.95423e-22	1_uninjured_vs_1_injured_9day			Endothelial cells
Bcam1	2.80541e-26	1.21148	0.498	0.202	5.0719e-22	1_uninjured_vs_1_injured_9day			Endothelial cells
Spock23	5.16486e-26	1.94228	0.33	0.068	9.33754e-22	1_uninjured_vs_1_injured_9day			Endothelial cells
Col4a13	7.37327e-26	-1.52588	0.482	0.686	1.33301e-21	1_uninjured_vs_1_injured_9day			Endothelial cells
Hspa1a3	1.42689e-25	1.50319	0.633	0.338	2.57968e-21	1_uninjured_vs_1_injured_9day			Endothelial cells
Id13	1.62092e-25	1.34889	0.482	0.184	2.93045e-21	1_uninjured_vs_1_injured_9day			Endothelial cells
Gm78082	3.32354e-25	1.15295	0.507	0.215	6.00862e-21	1_uninjured_vs_1_injured_9day			Endothelial cells
Myl63	3.39439e-25	0.897082	0.693	0.441	6.13671e-21	1_uninjured_vs_1_injured_9day			Endothelial cells
Ly6a3	2.03132e-24	1.01867	0.75	0.471	3.67242e-20	1_uninjured_vs_1_injured_9day			Endothelial cells
Cd141	2.89075e-24	-2.23711	0.112	0.394	5.22619e-20	1_uninjured_vs_1_injured_9day			Endothelial cells
Lyz24	5.39468e-24	-1.34953	0.016	0.247	9.75304e-20	1_uninjured_vs_1_injured_9day			Endothelial cells
Col4a23	6.27838e-24	-1.3937	0.411	0.65	1.13507e-19	1_uninjured_vs_1_injured_9day			Endothelial cells
Ptn4	6.70775e-24	2.22159	0.468	0.209	1.21269e-19	1_uninjured_vs_1_injured_9day			Endothelial cells
Rpl36-ps33	1.14136e-23	1.07064	0.433	0.163	2.06346e-19	1_uninjured_vs_1_injured_9day			Endothelial cells
Tinagl11	1.34977e-23	0.946023	0.649	0.346	2.44024e-19	1_uninjured_vs_1_injured_9day			Endothelial cells
Tmem2521	1.46048e-23	-1.11791	0.264	0.58	2.6404e-19	1_uninjured_vs_1_injured_9day			Endothelial cells
Sparcl14	3.8314e-23	0.802861	0.927	0.812	6.92679e-19	1_uninjured_vs_1_injured_9day			Endothelial cells
Flt11	3.83789e-23	1.0729	0.761	0.563	6.93853e-19	1_uninjured_vs_1_injured_9day			Endothelial cells
Rpl37a2	5.46488e-23	0.743625	0.837	0.673	9.87995e-19	1_uninjured_vs_1_injured_9day			Endothelial cells
Hsp90ab12	7.17419e-23	-0.549159	0.94	0.92	1.29702e-18	1_uninjured_vs_1_injured_9day			Endothelial cells
Aldh23	7.84726e-23	1.09804	0.489	0.205	1.41871e-18	1_uninjured_vs_1_injured_9day			Endothelial cells
Gm102694	8.02581e-23	1.07873	0.521	0.259	1.45099e-18	1_uninjured_vs_1_injured_9day			Endothelial cells
Gstp13	8.41801e-23	1.18064	0.392	0.133	1.52189e-18	1_uninjured_vs_1_injured_9day			Endothelial cells
Gstm14	1.31459e-22	1.23606	0.344	0.097	2.37665e-18	1_uninjured_vs_1_injured_9day			Endothelial cells
Rpl372	1.4828e-22	0.696185	0.844	0.681	2.68076e-18	1_uninjured_vs_1_injured_9day			Endothelial cells
8430408G22Rik1	1.91613e-22	1.13796	0.557	0.259	3.46417e-18	1_uninjured_vs_1_injured_9day			Endothelial cells
Sdpr2	2.70546e-22	0.710582	0.888	0.717	4.8912e-18	1_uninjured_vs_1_injured_9day			Endothelial cells
Pdlim14	4.36946e-22	-1.29167	0.298	0.578	7.89954e-18	1_uninjured_vs_1_injured_9day			Endothelial cells
Ccnd24	6.176e-22	1.12487	0.378	0.12	1.11656e-17	1_uninjured_vs_1_injured_9day			Endothelial cells
Aqp13	1.47502e-21	-0.97059	0.461	0.759	2.66669e-17	1_uninjured_vs_1_injured_9day			Endothelial cells
Klf44	3.04127e-21	1.01566	0.626	0.319	5.49832e-17	1_uninjured_vs_1_injured_9day			Endothelial cells
Rplp03	3.48575e-21	-0.826458	0.757	0.808	6.30189e-17	1_uninjured_vs_1_injured_9day			Endothelial cells
Vim4	5.16902e-21	-0.9255	0.784	0.857	9.34507e-17	1_uninjured_vs_1_injured_9day			Endothelial cells
Slco1a41	8.86766e-21	1.90195	0.312	0.087	1.60318e-16	1_uninjured_vs_1_injured_9day			Endothelial cells
Slc7a51	5.82881e-20	1.16348	0.19	0.017	1.05379e-15	1_uninjured_vs_1_injured_9day			Endothelial cells
Rpl18a4	6.39681e-20	0.754996	0.681	0.477	1.15648e-15	1_uninjured_vs_1_injured_9day			Endothelial cells
Clic51	7.37552e-20	1.05336	0.298	0.072	1.33342e-15	1_uninjured_vs_1_injured_9day			Endothelial cells
Gm98432	9.14632e-20	0.681398	0.782	0.603	1.65356e-15	1_uninjured_vs_1_injured_9day			Endothelial cells
Rps253	1.04225e-19	0.817767	0.667	0.471	1.88429e-15	1_uninjured_vs_1_injured_9day			Endothelial cells
Txnip2	1.07051e-19	0.718387	0.722	0.439	1.93537e-15	1_uninjured_vs_1_injured_9day			Endothelial cells
Mpz3	1.57514e-19	0.95938	0.181	0.013	2.84769e-15	1_uninjured_vs_1_injured_9day			Endothelial cells
Tspan131	1.69645e-19	0.77242	0.764	0.549	3.06702e-15	1_uninjured_vs_1_injured_9day			Endothelial cells
Thbs13	2.818e-19	-1.42269	0.087	0.321	5.09466e-15	1_uninjured_vs_1_injured_9day			Endothelial cells
Tacr1	5.35994e-19	-1.17169	0.018	0.205	9.69024e-15	1_uninjured_vs_1_injured_9day			Endothelial cells
Rbp71	1.04003e-18	1.79631	0.362	0.125	1.88027e-14	1_uninjured_vs_1_injured_9day			Endothelial cells
Marcksl14	1.55058e-18	-1.18896	0.014	0.194	2.80329e-14	1_uninjured_vs_1_injured_9day			Endothelial cells
Nfkbia1	2.54209e-18	-1.19414	0.75	0.825	4.59584e-14	1_uninjured_vs_1_injured_9day			Endothelial cells
Uba521	4.41104e-18	0.886184	0.461	0.224	7.97472e-14	1_uninjured_vs_1_injured_9day			Endothelial cells
Gm100763	4.47425e-18	0.771021	0.663	0.475	8.08899e-14	1_uninjured_vs_1_injured_9day			Endothelial cells
Ly6c23	4.72082e-18	0.879771	0.261	0.063	8.53478e-14	1_uninjured_vs_1_injured_9day			Endothelial cells
Nr1d11	4.80435e-18	0.750705	0.225	0.04	8.68578e-14	1_uninjured_vs_1_injured_9day			Endothelial cells
AW1120102	5.00687e-18	0.971883	0.491	0.236	9.05191e-14	1_uninjured_vs_1_injured_9day			Endothelial cells
Klf23	5.6718e-18	0.818413	0.716	0.479	1.0254e-13	1_uninjured_vs_1_injured_9day			Endothelial cells
Dbp1	8.00037e-18	0.980582	0.195	0.027	1.44639e-13	1_uninjured_vs_1_injured_9day			Endothelial cells
Rps33	9.51293e-18	-0.557379	0.894	0.863	1.71984e-13	1_uninjured_vs_1_injured_9day			Endothelial cells
Eef1b24	1.02331e-17	-0.865119	0.679	0.749	1.85004e-13	1_uninjured_vs_1_injured_9day			Endothelial cells
Mest4	1.44718e-17	-1.20837	0.041	0.236	2.61635e-13	1_uninjured_vs_1_injured_9day			Endothelial cells
Crip14	2.48313e-17	0.615596	0.823	0.603	4.48926e-13	1_uninjured_vs_1_injured_9day			Endothelial cells
Sncg1	2.965e-17	0.961112	0.406	0.171	5.36042e-13	1_uninjured_vs_1_injured_9day			Endothelial cells
Col18a13	3.30976e-17	-1.39199	0.174	0.401	5.98371e-13	1_uninjured_vs_1_injured_9day			Endothelial cells
Acta23	3.36456e-17	1.36894	0.307	0.097	6.08278e-13	1_uninjured_vs_1_injured_9day			Endothelial cells
Rpl343	3.57522e-17	0.837665	0.592	0.373	6.46363e-13	1_uninjured_vs_1_injured_9day			Endothelial cells
Hes13	4.12554e-17	0.935308	0.406	0.177	7.45857e-13	1_uninjured_vs_1_injured_9day			Endothelial cells
Mt24	4.96175e-17	1.04743	0.397	0.158	8.97036e-13	1_uninjured_vs_1_injured_9day			Endothelial cells
Rplp23	5.3891e-17	0.497565	0.904	0.781	9.74296e-13	1_uninjured_vs_1_injured_9day			Endothelial cells
Rpl353	5.85944e-17	0.888671	0.532	0.317	1.05933e-12	1_uninjured_vs_1_injured_9day			Endothelial cells
Mfsd2a1	8.70036e-17	1.25316	0.234	0.053	1.57294e-12	1_uninjured_vs_1_injured_9day			Endothelial cells
Hba-a13	1.19548e-16	-0.273825	0.241	0.051	2.16131e-12	1_uninjured_vs_1_injured_9day			Endothelial cells
Nfkbiz4	2.13316e-16	-1.31289	0.367	0.586	3.85653e-12	1_uninjured_vs_1_injured_9day			Endothelial cells
Cav13	3.9539e-16	0.544907	0.876	0.652	7.14826e-12	1_uninjured_vs_1_injured_9day			Endothelial cells
Hlf2	4.62736e-16	0.815359	0.17	0.021	8.36581e-12	1_uninjured_vs_1_injured_9day			Endothelial cells
Adh11	9.0303e-16	0.723404	0.19	0.032	1.63259e-11	1_uninjured_vs_1_injured_9day			Endothelial cells
Fosb4	3.03067e-15	-1.16823	0.472	0.662	5.47914e-11	1_uninjured_vs_1_injured_9day			Endothelial cells
Grb141	4.35247e-15	0.87751	0.165	0.023	7.86883e-11	1_uninjured_vs_1_injured_9day			Endothelial cells
Upp11	4.379e-15	-1.06598	0.08	0.276	7.9168e-11	1_uninjured_vs_1_injured_9day			Endothelial cells
Degs21	5.71745e-15	0.796625	0.172	0.027	1.03366e-10	1_uninjured_vs_1_injured_9day			Endothelial cells
Sepp13	8.33324e-15	0.640603	0.757	0.584	1.50657e-10	1_uninjured_vs_1_injured_9day			Endothelial cells
Clu3	8.66519e-15	0.920906	0.571	0.35	1.56658e-10	1_uninjured_vs_1_injured_9day			Endothelial cells
Ppic3	1.11595e-14	-1.0734	0.335	0.534	2.01753e-10	1_uninjured_vs_1_injured_9day			Endothelial cells
Timp13	1.47866e-14	-0.671099	0.018	0.167	2.67326e-10	1_uninjured_vs_1_injured_9day			Endothelial cells
Angptl73	1.7688e-14	0.628902	0.112	0.002	3.19781e-10	1_uninjured_vs_1_injured_9day			Endothelial cells
Myl93	2.04927e-14	1.01321	0.264	0.084	3.70487e-10	1_uninjured_vs_1_injured_9day			Endothelial cells
Rsad2	2.10462e-14	0.775942	0.163	0.023	3.80495e-10	1_uninjured_vs_1_injured_9day			Endothelial cells
Fosl24	3.12294e-14	-1.16973	0.227	0.445	5.64596e-10	1_uninjured_vs_1_injured_9day			Endothelial cells
Selp1	4.18625e-14	-1.13982	0.232	0.464	7.56833e-10	1_uninjured_vs_1_injured_9day			Endothelial cells
Prom11	5.18118e-14	1.13214	0.335	0.146	9.36706e-10	1_uninjured_vs_1_injured_9day			Endothelial cells
Ubb2	6.43624e-14	0.767162	0.624	0.441	1.16361e-09	1_uninjured_vs_1_injured_9day			Endothelial cells
Cd813	6.89901e-14	0.681808	0.755	0.567	1.24727e-09	1_uninjured_vs_1_injured_9day			Endothelial cells
Ppap2b3	8.61582e-14	0.946697	0.697	0.515	1.55765e-09	1_uninjured_vs_1_injured_9day			Endothelial cells
Igfbp44	8.8527e-14	-0.842715	0.493	0.686	1.60048e-09	1_uninjured_vs_1_injured_9day			Endothelial cells
Hspa54	1.1032e-13	-0.882717	0.617	0.719	1.99447e-09	1_uninjured_vs_1_injured_9day			Endothelial cells
Fabp43	1.29618e-13	0.980855	0.8	0.622	2.34337e-09	1_uninjured_vs_1_injured_9day			Endothelial cells
Sparc3	1.34114e-13	-0.399074	0.959	0.954	2.42465e-09	1_uninjured_vs_1_injured_9day			Endothelial cells
Gm98461	1.62623e-13	0.675847	0.319	0.129	2.94007e-09	1_uninjured_vs_1_injured_9day			Endothelial cells
Ptrf4	1.68776e-13	0.560031	0.784	0.629	3.0513e-09	1_uninjured_vs_1_injured_9day			Endothelial cells
Id34	2.84488e-13	0.740845	0.674	0.483	5.14326e-09	1_uninjured_vs_1_injured_9day			Endothelial cells
Cav23	2.91267e-13	0.692102	0.564	0.346	5.26581e-09	1_uninjured_vs_1_injured_9day			Endothelial cells
Hmgb13	3.11367e-13	0.758111	0.378	0.177	5.62921e-09	1_uninjured_vs_1_injured_9day			Endothelial cells
Lcn21	3.98215e-13	0.927791	0.19	0.046	7.19933e-09	1_uninjured_vs_1_injured_9day			Endothelial cells
Gm39403	4.15341e-13	0.649789	0.266	0.093	7.50895e-09	1_uninjured_vs_1_injured_9day			Endothelial cells
Pcp4l11	4.80019e-13	1.13586	0.399	0.203	8.67827e-09	1_uninjured_vs_1_injured_9day			Endothelial cells
Mbp1	7.93078e-13	0.605933	0.11	0.006	1.43381e-08	1_uninjured_vs_1_injured_9day			Endothelial cells
Tgfbi3	8.3596e-13	-1.06865	0.073	0.24	1.51133e-08	1_uninjured_vs_1_injured_9day			Endothelial cells
Myof1	1.0696e-12	-0.991236	0.213	0.413	1.93372e-08	1_uninjured_vs_1_injured_9day			Endothelial cells
Emp14	1.11572e-12	-0.913134	0.346	0.551	2.0171e-08	1_uninjured_vs_1_injured_9day			Endothelial cells
Sox44	1.23108e-12	-1.33332	0.147	0.329	2.22566e-08	1_uninjured_vs_1_injured_9day			Endothelial cells
Pam4	1.52456e-12	0.904387	0.587	0.405	2.75625e-08	1_uninjured_vs_1_injured_9day			Endothelial cells
Itm2b2	1.6116e-12	0.53159	0.883	0.755	2.91361e-08	1_uninjured_vs_1_injured_9day			Endothelial cells
Abcg21	1.71481e-12	0.813397	0.633	0.475	3.10021e-08	1_uninjured_vs_1_injured_9day			Endothelial cells
Timp41	2.30267e-12	1.21999	0.11	0.008	4.16299e-08	1_uninjured_vs_1_injured_9day			Endothelial cells
Xist3	2.44983e-12	-1.31378	0.209	0.403	4.42904e-08	1_uninjured_vs_1_injured_9day			Endothelial cells
Axin21	2.6775e-12	0.468198	0.128	0.015	4.84066e-08	1_uninjured_vs_1_injured_9day			Endothelial cells
Cmah1	2.69724e-12	-1.18691	0.018	0.144	4.87634e-08	1_uninjured_vs_1_injured_9day			Endothelial cells
Gnb2l13	3.16109e-12	-0.603141	0.791	0.806	5.71494e-08	1_uninjured_vs_1_injured_9day			Endothelial cells
Postn4	3.52645e-12	-0.970199	0.069	0.23	6.37547e-08	1_uninjured_vs_1_injured_9day			Endothelial cells
Podxl1	3.55378e-12	0.626371	0.489	0.279	6.42488e-08	1_uninjured_vs_1_injured_9day			Endothelial cells
Clec2d2	3.63954e-12	0.728985	0.452	0.255	6.57993e-08	1_uninjured_vs_1_injured_9day			Endothelial cells
Scd22	4.22775e-12	-0.852504	0.243	0.441	7.64335e-08	1_uninjured_vs_1_injured_9day			Endothelial cells
Fhl14	4.38011e-12	0.562512	0.209	0.059	7.91879e-08	1_uninjured_vs_1_injured_9day			Endothelial cells
Car2	4.46982e-12	-0.793274	0.023	0.156	8.08099e-08	1_uninjured_vs_1_injured_9day			Endothelial cells
Tnfaip3	4.81139e-12	-0.86717	0.053	0.205	8.69852e-08	1_uninjured_vs_1_injured_9day			Endothelial cells
Cd300lg	5.04863e-12	0.973601	0.314	0.135	9.12741e-08	1_uninjured_vs_1_injured_9day			Endothelial cells
Mir6823	5.58721e-12	0.651637	0.312	0.137	1.01011e-07	1_uninjured_vs_1_injured_9day			Endothelial cells
Abcb1a1	6.59495e-12	1.26412	0.571	0.426	1.1923e-07	1_uninjured_vs_1_injured_9day			Endothelial cells
Lgmn3	7.25174e-12	-1.01318	0.266	0.452	1.31104e-07	1_uninjured_vs_1_injured_9day			Endothelial cells
Rpl413	9.54348e-12	0.395438	0.908	0.817	1.72537e-07	1_uninjured_vs_1_injured_9day			Endothelial cells
Ndufs52	1.09692e-11	0.653132	0.241	0.084	1.98312e-07	1_uninjured_vs_1_injured_9day			Endothelial cells
Ypel21	1.30317e-11	-0.90575	0.151	0.335	2.356e-07	1_uninjured_vs_1_injured_9day			Endothelial cells
Xbp13	1.33206e-11	-1.03183	0.333	0.515	2.40823e-07	1_uninjured_vs_1_injured_9day			Endothelial cells
Arl4d1	1.57951e-11	0.740319	0.216	0.068	2.85559e-07	1_uninjured_vs_1_injured_9day			Endothelial cells
Dpysl34	1.61202e-11	-1.00632	0.117	0.287	2.91437e-07	1_uninjured_vs_1_injured_9day			Endothelial cells
Sult1a11	1.68339e-11	0.889535	0.397	0.205	3.0434e-07	1_uninjured_vs_1_injured_9day			Endothelial cells
Calr2	1.80306e-11	-0.726017	0.58	0.684	3.25976e-07	1_uninjured_vs_1_injured_9day			Endothelial cells
Limch11	1.80326e-11	0.882168	0.326	0.152	3.26011e-07	1_uninjured_vs_1_injured_9day			Endothelial cells
Efhd11	2.0345e-11	0.738737	0.216	0.068	3.67817e-07	1_uninjured_vs_1_injured_9day			Endothelial cells
Slc7a11	2.2345e-11	0.815435	0.193	0.055	4.03976e-07	1_uninjured_vs_1_injured_9day			Endothelial cells
Ltbp44	2.29391e-11	0.661829	0.447	0.259	4.14715e-07	1_uninjured_vs_1_injured_9day			Endothelial cells
Pxdn4	2.79497e-11	-1.07768	0.22	0.405	5.05303e-07	1_uninjured_vs_1_injured_9day			Endothelial cells
Serinc31	2.83151e-11	0.658914	0.656	0.506	5.11908e-07	1_uninjured_vs_1_injured_9day			Endothelial cells
Atp5j2	3.03132e-11	0.616944	0.642	0.441	5.48033e-07	1_uninjured_vs_1_injured_9day			Endothelial cells
Cd744	3.16429e-11	-1.40265	0.046	0.186	5.72072e-07	1_uninjured_vs_1_injured_9day			Endothelial cells
Pmp224	3.20741e-11	0.789868	0.248	0.093	5.79868e-07	1_uninjured_vs_1_injured_9day			Endothelial cells
Psme2b3	3.89767e-11	0.756235	0.321	0.154	7.0466e-07	1_uninjured_vs_1_injured_9day			Endothelial cells
Tcf253	4.07434e-11	0.566553	0.557	0.365	7.366e-07	1_uninjured_vs_1_injured_9day			Endothelial cells
Bmx1	4.1675e-11	0.983016	0.243	0.089	7.53443e-07	1_uninjured_vs_1_injured_9day			Endothelial cells
Igfbp73	4.22107e-11	-0.400451	0.947	0.943	7.63126e-07	1_uninjured_vs_1_injured_9day			Endothelial cells
Psap3	5.08301e-11	0.544413	0.585	0.418	9.18957e-07	1_uninjured_vs_1_injured_9day			Endothelial cells
Gda3	5.33864e-11	-1.04271	0.234	0.424	9.65172e-07	1_uninjured_vs_1_injured_9day			Endothelial cells
Cd36	7.61749e-11	1.02026	0.608	0.441	1.37717e-06	1_uninjured_vs_1_injured_9day			Endothelial cells
Rcn3	8.04152e-11	0.702573	0.323	0.156	1.45383e-06	1_uninjured_vs_1_injured_9day			Endothelial cells
Igfbp63	8.169e-11	0.478788	0.312	0.139	1.47687e-06	1_uninjured_vs_1_injured_9day			Endothelial cells
Gm102604	9.77309e-11	0.532436	0.647	0.521	1.76688e-06	1_uninjured_vs_1_injured_9day			Endothelial cells
Sox171	1.00092e-10	0.751074	0.498	0.321	1.80957e-06	1_uninjured_vs_1_injured_9day			Endothelial cells
H193	1.0446e-10	-0.821694	0.011	0.118	1.88853e-06	1_uninjured_vs_1_injured_9day			Endothelial cells
C1qtnf91	1.06163e-10	0.777578	0.5	0.306	1.91932e-06	1_uninjured_vs_1_injured_9day			Endothelial cells
Sema7a1	1.2245e-10	0.878645	0.291	0.131	2.21378e-06	1_uninjured_vs_1_injured_9day			Endothelial cells
Rpl382	1.23284e-10	0.598976	0.546	0.388	2.22886e-06	1_uninjured_vs_1_injured_9day			Endothelial cells
Cyb5b1	1.35551e-10	0.67643	0.266	0.114	2.45062e-06	1_uninjured_vs_1_injured_9day			Endothelial cells
H2-T233	1.35892e-10	0.712972	0.44	0.259	2.45679e-06	1_uninjured_vs_1_injured_9day			Endothelial cells
Ptms2	1.40272e-10	0.445871	0.755	0.591	2.53597e-06	1_uninjured_vs_1_injured_9day			Endothelial cells
Dusp33	1.45335e-10	0.655717	0.353	0.179	2.62751e-06	1_uninjured_vs_1_injured_9day			Endothelial cells
Ctsb3	1.4753e-10	-0.829503	0.498	0.631	2.6672e-06	1_uninjured_vs_1_injured_9day			Endothelial cells
Rps264	1.63769e-10	-0.513303	0.8	0.816	2.96079e-06	1_uninjured_vs_1_injured_9day			Endothelial cells
9430020K01Rik3	1.8574e-10	0.784285	0.307	0.144	3.35799e-06	1_uninjured_vs_1_injured_9day			Endothelial cells
Rpl133	2.04857e-10	0.433296	0.768	0.625	3.70361e-06	1_uninjured_vs_1_injured_9day			Endothelial cells
Gm102503	2.10121e-10	0.703305	0.401	0.232	3.79878e-06	1_uninjured_vs_1_injured_9day			Endothelial cells
Fth12	2.38062e-10	0.328752	0.947	0.886	4.30392e-06	1_uninjured_vs_1_injured_9day			Endothelial cells
Egfl73	2.73375e-10	0.3572	0.913	0.802	4.94234e-06	1_uninjured_vs_1_injured_9day			Endothelial cells
Palm3	3.12879e-10	0.715243	0.158	0.042	5.65654e-06	1_uninjured_vs_1_injured_9day			Endothelial cells
Eif11	3.29378e-10	0.447843	0.768	0.637	5.95483e-06	1_uninjured_vs_1_injured_9day			Endothelial cells
Fam167b1	3.91564e-10	-0.760227	0.087	0.243	7.07909e-06	1_uninjured_vs_1_injured_9day			Endothelial cells
Rps204	3.93332e-10	-0.400457	0.867	0.854	7.11105e-06	1_uninjured_vs_1_injured_9day			Endothelial cells
Prss232	4.10906e-10	-1.01528	0.243	0.414	7.42877e-06	1_uninjured_vs_1_injured_9day			Endothelial cells
Rbp14	4.23897e-10	-0.862094	0.14	0.312	7.66363e-06	1_uninjured_vs_1_injured_9day			Endothelial cells
Jup1	4.61573e-10	0.796949	0.186	0.061	8.34477e-06	1_uninjured_vs_1_injured_9day			Endothelial cells
Btnl9	6.30426e-10	1.24679	0.126	0.025	1.13975e-05	1_uninjured_vs_1_injured_9day			Endothelial cells
Rarres23	7.24815e-10	0.685543	0.181	0.057	1.31039e-05	1_uninjured_vs_1_injured_9day			Endothelial cells
Rps163	7.29493e-10	0.491135	0.56	0.401	1.31885e-05	1_uninjured_vs_1_injured_9day			Endothelial cells
AA467197	7.75743e-10	-0.518506	0.009	0.105	1.40246e-05	1_uninjured_vs_1_injured_9day			Endothelial cells
Eps8l21	8.26731e-10	0.545927	0.151	0.038	1.49465e-05	1_uninjured_vs_1_injured_9day			Endothelial cells
Mmp144	9.68382e-10	-0.770391	0.117	0.268	1.75074e-05	1_uninjured_vs_1_injured_9day			Endothelial cells
Gm227613	9.95179e-10	0.604333	0.211	0.078	1.79918e-05	1_uninjured_vs_1_injured_9day			Endothelial cells
1810011O10Rik3	1.06978e-09	-0.937488	0.257	0.42	1.93406e-05	1_uninjured_vs_1_injured_9day			Endothelial cells
Aplp23	1.14446e-09	0.442848	0.794	0.667	2.06907e-05	1_uninjured_vs_1_injured_9day			Endothelial cells
Atp5k3	1.17142e-09	0.523765	0.5	0.329	2.11781e-05	1_uninjured_vs_1_injured_9day			Endothelial cells
Mertk1	1.18988e-09	0.575974	0.177	0.055	2.15119e-05	1_uninjured_vs_1_injured_9day			Endothelial cells
Ugcg4	1.2255e-09	-0.865811	0.119	0.278	2.21558e-05	1_uninjured_vs_1_injured_9day			Endothelial cells
Ushbp1	1.26294e-09	0.586221	0.583	0.414	2.28328e-05	1_uninjured_vs_1_injured_9day			Endothelial cells
Lrrc584	1.28569e-09	0.482597	0.658	0.487	2.32439e-05	1_uninjured_vs_1_injured_9day			Endothelial cells
Rps93	1.29235e-09	-0.421683	0.883	0.869	2.33644e-05	1_uninjured_vs_1_injured_9day			Endothelial cells
Rps213	1.35993e-09	0.32841	0.952	0.861	2.45862e-05	1_uninjured_vs_1_injured_9day			Endothelial cells
Mgll2	1.36843e-09	0.791236	0.661	0.498	2.47399e-05	1_uninjured_vs_1_injured_9day			Endothelial cells
Gm100734	1.41082e-09	0.509524	0.353	0.186	2.55062e-05	1_uninjured_vs_1_injured_9day			Endothelial cells
Gadd45g4	1.69135e-09	0.663997	0.557	0.382	3.05779e-05	1_uninjured_vs_1_injured_9day			Endothelial cells
Kmt2e3	1.72393e-09	0.685481	0.516	0.352	3.11668e-05	1_uninjured_vs_1_injured_9day			Endothelial cells
Darc	1.83781e-09	-0.865982	0.239	0.426	3.32258e-05	1_uninjured_vs_1_injured_9day			Endothelial cells
Fkbp10	1.93093e-09	-0.647229	0.034	0.15	3.49093e-05	1_uninjured_vs_1_injured_9day			Endothelial cells
Dusp2	2.70996e-09	-0.994181	0.094	0.236	4.89933e-05	1_uninjured_vs_1_injured_9day			Endothelial cells
Rasd11	2.71203e-09	0.601739	0.259	0.108	4.90308e-05	1_uninjured_vs_1_injured_9day			Endothelial cells
Mndal3	2.88252e-09	0.618888	0.415	0.247	5.21131e-05	1_uninjured_vs_1_injured_9day			Endothelial cells
Actn43	3.20025e-09	0.611583	0.672	0.561	5.78572e-05	1_uninjured_vs_1_injured_9day			Endothelial cells
Csrp23	3.96292e-09	-0.671331	0.186	0.348	7.16456e-05	1_uninjured_vs_1_injured_9day			Endothelial cells
Lamb23	4.26054e-09	0.52941	0.356	0.192	7.70264e-05	1_uninjured_vs_1_injured_9day			Endothelial cells
mt-Co12	4.42018e-09	0.333556	0.697	0.525	7.99124e-05	1_uninjured_vs_1_injured_9day			Endothelial cells
Gm102884	4.5445e-09	0.647385	0.436	0.279	8.216e-05	1_uninjured_vs_1_injured_9day			Endothelial cells
Camk2n12	4.64388e-09	0.492644	0.138	0.034	8.39568e-05	1_uninjured_vs_1_injured_9day			Endothelial cells
Plcb43	4.75406e-09	0.581534	0.507	0.342	8.59487e-05	1_uninjured_vs_1_injured_9day			Endothelial cells
Cytl11	4.76091e-09	1.72416	0.126	0.029	8.60725e-05	1_uninjured_vs_1_injured_9day			Endothelial cells
Lims2	5.19058e-09	0.609755	0.287	0.137	9.38405e-05	1_uninjured_vs_1_injured_9day			Endothelial cells
H2-Ab13	5.54344e-09	-1.02527	0.044	0.158	0.00010022	1_uninjured_vs_1_injured_9day			Endothelial cells
Itm2c2	6.14186e-09	-0.95333	0.406	0.54	0.000111039	1_uninjured_vs_1_injured_9day			Endothelial cells
Slfn51	6.16126e-09	0.762258	0.537	0.38	0.000111389	1_uninjured_vs_1_injured_9day			Endothelial cells
Ptma2	6.5116e-09	0.415685	0.697	0.555	0.000117723	1_uninjured_vs_1_injured_9day			Endothelial cells
C130074G19Rik1	6.74818e-09	0.547294	0.647	0.513	0.000122	1_uninjured_vs_1_injured_9day			Endothelial cells
Abcg11	6.84583e-09	-0.586261	0.083	0.224	0.000123766	1_uninjured_vs_1_injured_9day			Endothelial cells
Aprt3	7.00736e-09	-0.567492	0.133	0.281	0.000126686	1_uninjured_vs_1_injured_9day			Endothelial cells
Slc3a23	7.01021e-09	0.753869	0.534	0.405	0.000126738	1_uninjured_vs_1_injured_9day			Endothelial cells
Laptm4a2	7.77469e-09	0.364031	0.814	0.688	0.000140559	1_uninjured_vs_1_injured_9day			Endothelial cells
Syn31	7.91588e-09	0.625754	0.239	0.103	0.000143111	1_uninjured_vs_1_injured_9day			Endothelial cells
Pdia63	8.15349e-09	-0.81897	0.287	0.445	0.000147407	1_uninjured_vs_1_injured_9day			Endothelial cells
1810037I17Rik3	9.02728e-09	0.421916	0.555	0.405	0.000163204	1_uninjured_vs_1_injured_9day			Endothelial cells
Pnkd2	1.05015e-08	0.525609	0.259	0.118	0.000189856	1_uninjured_vs_1_injured_9day			Endothelial cells
D4Wsu53e2	1.12256e-08	0.420838	0.734	0.582	0.000202948	1_uninjured_vs_1_injured_9day			Endothelial cells
Gng22	1.18577e-08	-0.693927	0.053	0.171	0.000214376	1_uninjured_vs_1_injured_9day			Endothelial cells
Rps193	1.23385e-08	0.429833	0.81	0.703	0.000223068	1_uninjured_vs_1_injured_9day			Endothelial cells
1110038B12Rik3	1.27503e-08	-0.640947	0.108	0.247	0.000230513	1_uninjured_vs_1_injured_9day			Endothelial cells
Pls3	1.29319e-08	0.587759	0.413	0.257	0.000233796	1_uninjured_vs_1_injured_9day			Endothelial cells
Akr1c141	1.35402e-08	0.383435	0.106	0.019	0.000244793	1_uninjured_vs_1_injured_9day			Endothelial cells
Icam1	1.45172e-08	-1.28152	0.245	0.38	0.000262457	1_uninjured_vs_1_injured_9day			Endothelial cells
Gpihbp11	1.52809e-08	1.40729	0.31	0.167	0.000276264	1_uninjured_vs_1_injured_9day			Endothelial cells
Hsph12	1.53295e-08	-0.698677	0.147	0.3	0.000277142	1_uninjured_vs_1_injured_9day			Endothelial cells
Map1lc3a1	1.53526e-08	0.518917	0.303	0.158	0.00027756	1_uninjured_vs_1_injured_9day			Endothelial cells
A4galt1	1.60655e-08	0.575759	0.149	0.044	0.000290448	1_uninjured_vs_1_injured_9day			Endothelial cells
Gm52392	1.62677e-08	0.445005	0.119	0.027	0.000294105	1_uninjured_vs_1_injured_9day			Endothelial cells
Cxx1a1	1.83839e-08	0.597109	0.349	0.194	0.000332363	1_uninjured_vs_1_injured_9day			Endothelial cells
Rras	1.86684e-08	0.532477	0.31	0.16	0.000337506	1_uninjured_vs_1_injured_9day			Endothelial cells
Cobll11	2.20968e-08	0.798295	0.163	0.055	0.000399489	1_uninjured_vs_1_injured_9day			Endothelial cells
Gm51603	2.24817e-08	0.59824	0.275	0.137	0.000406447	1_uninjured_vs_1_injured_9day			Endothelial cells
Fas1	2.30908e-08	0.603016	0.202	0.08	0.000417458	1_uninjured_vs_1_injured_9day			Endothelial cells
Nid13	2.43408e-08	-0.69157	0.193	0.35	0.000440058	1_uninjured_vs_1_injured_9day			Endothelial cells
Rps6ka33	2.57394e-08	-0.699475	0.131	0.27	0.000465342	1_uninjured_vs_1_injured_9day			Endothelial cells
Sele	2.71069e-08	-0.942295	0.135	0.283	0.000490065	1_uninjured_vs_1_injured_9day			Endothelial cells
Slc2a11	2.97149e-08	0.725943	0.372	0.222	0.000537217	1_uninjured_vs_1_injured_9day			Endothelial cells
Rpl13-ps33	3.07819e-08	0.64528	0.452	0.312	0.000556507	1_uninjured_vs_1_injured_9day			Endothelial cells
Fryl1	3.24572e-08	0.806687	0.298	0.163	0.000586793	1_uninjured_vs_1_injured_9day			Endothelial cells
Lpl3	3.54535e-08	0.864038	0.17	0.061	0.000640963	1_uninjured_vs_1_injured_9day			Endothelial cells
Thra3	3.5478e-08	0.570505	0.36	0.211	0.000641407	1_uninjured_vs_1_injured_9day			Endothelial cells
Atp8b12	4.11414e-08	-0.753613	0.165	0.312	0.000743796	1_uninjured_vs_1_injured_9day			Endothelial cells
Gm112732	4.23977e-08	0.399743	0.151	0.048	0.000766508	1_uninjured_vs_1_injured_9day			Endothelial cells
Susd41	4.29425e-08	0.476715	0.108	0.023	0.000776357	1_uninjured_vs_1_injured_9day			Endothelial cells
Gm267354	4.41808e-08	-0.448646	0.023	0.116	0.000798744	1_uninjured_vs_1_injured_9day			Endothelial cells
Sdcbp2	4.51559e-08	-0.778473	0.374	0.506	0.000816374	1_uninjured_vs_1_injured_9day			Endothelial cells
S100a12	4.90501e-08	0.646211	0.206	0.086	0.000886776	1_uninjured_vs_1_injured_9day			Endothelial cells
Fbln51	4.9621e-08	-0.797273	0.202	0.359	0.000897098	1_uninjured_vs_1_injured_9day			Endothelial cells
Syne12	5.12428e-08	0.482202	0.216	0.089	0.000926418	1_uninjured_vs_1_injured_9day			Endothelial cells
Gm101263	5.26797e-08	0.409254	0.163	0.055	0.000952397	1_uninjured_vs_1_injured_9day			Endothelial cells
Fmo13	5.42599e-08	0.512967	0.236	0.105	0.000980965	1_uninjured_vs_1_injured_9day			Endothelial cells
Tjp21	5.6037e-08	0.597591	0.3	0.163	0.00101309	1_uninjured_vs_1_injured_9day			Endothelial cells
Adamts43	5.71304e-08	-0.58481	0.076	0.198	0.00103286	1_uninjured_vs_1_injured_9day			Endothelial cells
Rps3a34	6.46789e-08	0.372541	0.585	0.411	0.00116933	1_uninjured_vs_1_injured_9day			Endothelial cells
Cwc222	6.64979e-08	0.684627	0.408	0.26	0.00120222	1_uninjured_vs_1_injured_9day			Endothelial cells
Ppp3cc1	6.98331e-08	0.518809	0.142	0.044	0.00126251	1_uninjured_vs_1_injured_9day			Endothelial cells
Fblim14	7.04106e-08	-0.575827	0.05	0.16	0.00127295	1_uninjured_vs_1_injured_9day			Endothelial cells
Psme22	7.37915e-08	0.633629	0.401	0.255	0.00133408	1_uninjured_vs_1_injured_9day			Endothelial cells
Bhlhe401	7.64847e-08	0.508782	0.282	0.143	0.00138277	1_uninjured_vs_1_injured_9day			Endothelial cells
Smoc24	8.17462e-08	0.651174	0.163	0.059	0.00147789	1_uninjured_vs_1_injured_9day			Endothelial cells
Gm81862	8.32348e-08	0.416553	0.248	0.118	0.0015048	1_uninjured_vs_1_injured_9day			Endothelial cells
Vcan4	9.24275e-08	-0.868991	0.044	0.144	0.001671	1_uninjured_vs_1_injured_9day			Endothelial cells
Map4k21	9.68569e-08	0.451871	0.122	0.032	0.00175108	1_uninjured_vs_1_injured_9day			Endothelial cells
Lpar61	9.98773e-08	0.82956	0.42	0.283	0.00180568	1_uninjured_vs_1_injured_9day			Endothelial cells
Cotl13	1.00938e-07	-0.510524	0.039	0.139	0.00182486	1_uninjured_vs_1_injured_9day			Endothelial cells
Vmp13	1.05726e-07	-0.645971	0.172	0.314	0.00191141	1_uninjured_vs_1_injured_9day			Endothelial cells
Gm84443	1.18753e-07	0.482949	0.289	0.152	0.00214693	1_uninjured_vs_1_injured_9day			Endothelial cells
Rpl13a-ps13	1.31928e-07	0.458612	0.275	0.141	0.00238512	1_uninjured_vs_1_injured_9day			Endothelial cells
Nes3	1.33707e-07	0.661514	0.25	0.12	0.00241729	1_uninjured_vs_1_injured_9day			Endothelial cells
Pllp1	1.50913e-07	0.616047	0.14	0.046	0.00272836	1_uninjured_vs_1_injured_9day			Endothelial cells
Igf23	1.52691e-07	0.923088	0.154	0.051	0.0027605	1_uninjured_vs_1_injured_9day			Endothelial cells
Ifit11	1.54827e-07	0.50761	0.117	0.03	0.00279912	1_uninjured_vs_1_injured_9day			Endothelial cells
Rpl233	1.55693e-07	0.339113	0.787	0.686	0.00281477	1_uninjured_vs_1_injured_9day			Endothelial cells
Rpl304	1.59724e-07	0.714566	0.452	0.338	0.00288765	1_uninjured_vs_1_injured_9day			Endothelial cells
Rps283	1.61293e-07	0.419459	0.638	0.506	0.00291601	1_uninjured_vs_1_injured_9day			Endothelial cells
Uqcr113	1.61622e-07	0.458427	0.532	0.392	0.00292197	1_uninjured_vs_1_injured_9day			Endothelial cells
Cped11	1.74642e-07	0.450186	0.193	0.078	0.00315735	1_uninjured_vs_1_injured_9day			Endothelial cells
Slc39a101	1.80064e-07	0.921157	0.339	0.213	0.00325538	1_uninjured_vs_1_injured_9day			Endothelial cells
Litaf1	1.8689e-07	-0.780046	0.211	0.356	0.00337878	1_uninjured_vs_1_injured_9day			Endothelial cells
Atp5l1	1.90437e-07	0.41751	0.122	0.034	0.00344291	1_uninjured_vs_1_injured_9day			Endothelial cells
Sptbn12	2.06325e-07	0.310053	0.869	0.768	0.00373016	1_uninjured_vs_1_injured_9day			Endothelial cells
Tns12	2.1688e-07	0.446009	0.326	0.183	0.00392097	1_uninjured_vs_1_injured_9day			Endothelial cells
Chp2	2.22146e-07	0.347814	0.383	0.228	0.00401617	1_uninjured_vs_1_injured_9day			Endothelial cells
Dpm31	2.51078e-07	0.502364	0.344	0.202	0.00453925	1_uninjured_vs_1_injured_9day			Endothelial cells
Fabp52	2.60723e-07	0.992103	0.342	0.217	0.00471362	1_uninjured_vs_1_injured_9day			Endothelial cells
Mal1	2.6786e-07	0.693027	0.312	0.177	0.00484264	1_uninjured_vs_1_injured_9day			Endothelial cells
Rasgrf21	2.7404e-07	0.467588	0.158	0.057	0.00495437	1_uninjured_vs_1_injured_9day			Endothelial cells
Bcl6b1	2.95539e-07	0.62006	0.195	0.084	0.00534306	1_uninjured_vs_1_injured_9day			Endothelial cells
Ssr33	2.99342e-07	-0.830178	0.278	0.42	0.0054118	1_uninjured_vs_1_injured_9day			Endothelial cells
Tbc1d81	3.00948e-07	-0.821341	0.083	0.194	0.00544084	1_uninjured_vs_1_injured_9day			Endothelial cells
Hoxd31	3.01289e-07	0.583211	0.337	0.196	0.005447	1_uninjured_vs_1_injured_9day			Endothelial cells
Ptp4a3	3.38757e-07	0.643221	0.206	0.093	0.00612439	1_uninjured_vs_1_injured_9day			Endothelial cells
Cbx71	3.47203e-07	0.366231	0.133	0.042	0.00627709	1_uninjured_vs_1_injured_9day			Endothelial cells
Xaf11	3.48664e-07	0.644894	0.236	0.118	0.0063035	1_uninjured_vs_1_injured_9day			Endothelial cells
Il10rb1	3.85841e-07	0.473215	0.234	0.116	0.00697562	1_uninjured_vs_1_injured_9day			Endothelial cells
Maoa1	4.26854e-07	0.734497	0.321	0.192	0.0077171	1_uninjured_vs_1_injured_9day			Endothelial cells
Anp32a1	5.0045e-07	0.416751	0.658	0.532	0.00904764	1_uninjured_vs_1_injured_9day			Endothelial cells
Mctp11	5.01299e-07	-0.867456	0.122	0.241	0.00906299	1_uninjured_vs_1_injured_9day			Endothelial cells
Tpst12	5.09043e-07	0.463834	0.17	0.067	0.00920298	1_uninjured_vs_1_injured_9day			Endothelial cells
Rnd32	5.15381e-07	0.524729	0.135	0.046	0.00931757	1_uninjured_vs_1_injured_9day			Endothelial cells
Mcam1	5.18792e-07	-0.833577	0.135	0.259	0.00937924	1_uninjured_vs_1_injured_9day			Endothelial cells
Dnaja12	5.20806e-07	0.50798	0.585	0.471	0.00941565	1_uninjured_vs_1_injured_9day			Endothelial cells
Emp24	5.24792e-07	0.49962	0.28	0.148	0.00948771	1_uninjured_vs_1_injured_9day			Endothelial cells
Icam2	5.78361e-07	0.484915	0.447	0.304	0.0104562	1_uninjured_vs_1_injured_9day			Endothelial cells
Mgst12	5.88314e-07	0.440069	0.376	0.236	0.0106361	1_uninjured_vs_1_injured_9day			Endothelial cells
Acvrl12	6.95638e-07	0.392392	0.406	0.268	0.0125764	1_uninjured_vs_1_injured_9day			Endothelial cells
Cdk43	7.39775e-07	-0.748713	0.209	0.338	0.0133744	1_uninjured_vs_1_injured_9day			Endothelial cells
Calm13	7.41663e-07	0.291782	0.945	0.869	0.0134085	1_uninjured_vs_1_injured_9day			Endothelial cells
Epn23	7.57368e-07	0.536716	0.257	0.137	0.0136925	1_uninjured_vs_1_injured_9day			Endothelial cells
Fkbp1a3	7.7041e-07	-0.56289	0.624	0.694	0.0139282	1_uninjured_vs_1_injured_9day			Endothelial cells
Cd59a1	7.75353e-07	0.738199	0.447	0.323	0.0140176	1_uninjured_vs_1_injured_9day			Endothelial cells
Cd24a1	7.76058e-07	0.605958	0.138	0.048	0.0140304	1_uninjured_vs_1_injured_9day			Endothelial cells
Cysltr1	7.78538e-07	-0.74891	0.128	0.249	0.0140752	1_uninjured_vs_1_injured_9day			Endothelial cells
Fstl13	8.27576e-07	-0.701935	0.358	0.5	0.0149617	1_uninjured_vs_1_injured_9day			Endothelial cells
Pde2a	8.33339e-07	0.34804	0.388	0.243	0.0150659	1_uninjured_vs_1_injured_9day			Endothelial cells
Hsp90aa14	8.38663e-07	0.41734	0.596	0.456	0.0151622	1_uninjured_vs_1_injured_9day			Endothelial cells
Ifit21	8.77693e-07	0.457796	0.11	0.03	0.0158678	1_uninjured_vs_1_injured_9day			Endothelial cells
H2-Aa	9.18309e-07	-0.900718	0.044	0.135	0.0166021	1_uninjured_vs_1_injured_9day			Endothelial cells
Tes2	9.26174e-07	-0.625273	0.225	0.363	0.0167443	1_uninjured_vs_1_injured_9day			Endothelial cells
Rpl183	1.00956e-06	0.344202	0.706	0.584	0.0182519	1_uninjured_vs_1_injured_9day			Endothelial cells
Sned14	1.04724e-06	0.432196	0.255	0.135	0.018933	1_uninjured_vs_1_injured_9day			Endothelial cells
Tmbim1	1.0925e-06	0.511033	0.225	0.114	0.0197513	1_uninjured_vs_1_injured_9day			Endothelial cells
Slc25a33	1.11523e-06	-0.635288	0.509	0.595	0.0201623	1_uninjured_vs_1_injured_9day			Endothelial cells
Lgals14	1.13331e-06	-0.839796	0.236	0.375	0.0204891	1_uninjured_vs_1_injured_9day			Endothelial cells
Pik3ip12	1.14329e-06	0.429502	0.211	0.099	0.0206695	1_uninjured_vs_1_injured_9day			Endothelial cells
Pura2	1.14808e-06	0.748663	0.356	0.23	0.0207561	1_uninjured_vs_1_injured_9day			Endothelial cells
1500012F01Rik4	1.16072e-06	-0.74686	0.287	0.413	0.0209847	1_uninjured_vs_1_injured_9day			Endothelial cells
Rps10-ps13	1.21239e-06	0.343892	0.583	0.454	0.0219189	1_uninjured_vs_1_injured_9day			Endothelial cells
Tril2	1.26205e-06	0.38536	0.115	0.034	0.0228166	1_uninjured_vs_1_injured_9day			Endothelial cells
Jak12	1.28799e-06	-0.533359	0.358	0.494	0.0232856	1_uninjured_vs_1_injured_9day			Endothelial cells
Lmo71	1.31164e-06	0.383201	0.287	0.156	0.0237131	1_uninjured_vs_1_injured_9day			Endothelial cells
Slc50a12	1.31208e-06	0.565198	0.362	0.24	0.0237211	1_uninjured_vs_1_injured_9day			Endothelial cells
Ehd41	1.34753e-06	-0.476118	0.638	0.724	0.024362	1_uninjured_vs_1_injured_9day			Endothelial cells
Tfpi3	1.48643e-06	-0.521711	0.089	0.202	0.0268731	1_uninjured_vs_1_injured_9day			Endothelial cells
Aktip	1.5068e-06	0.39314	0.158	0.063	0.0272414	1_uninjured_vs_1_injured_9day			Endothelial cells
Ptpn181	1.56057e-06	-0.601211	0.158	0.279	0.0282136	1_uninjured_vs_1_injured_9day			Endothelial cells
Msn3	1.64455e-06	-0.604268	0.564	0.648	0.0297318	1_uninjured_vs_1_injured_9day			Endothelial cells
Cp4	1.65797e-06	0.465102	0.202	0.093	0.0299744	1_uninjured_vs_1_injured_9day			Endothelial cells
Esyt2	1.66315e-06	0.422094	0.333	0.2	0.0300681	1_uninjured_vs_1_injured_9day			Endothelial cells
Cab39l2	1.69103e-06	0.453471	0.131	0.046	0.0305722	1_uninjured_vs_1_injured_9day			Endothelial cells
Gm7334	1.71943e-06	0.441087	0.106	0.03	0.0310855	1_uninjured_vs_1_injured_9day			Endothelial cells
Cuedc13	1.81815e-06	0.499801	0.165	0.068	0.0328703	1_uninjured_vs_1_injured_9day			Endothelial cells
Gsto12	1.82166e-06	-0.252629	0.041	0.131	0.0329339	1_uninjured_vs_1_injured_9day			Endothelial cells
Spats23	1.83183e-06	-0.368334	0.028	0.106	0.0331177	1_uninjured_vs_1_injured_9day			Endothelial cells
Serpina3g1	1.92833e-06	-0.590198	0.025	0.103	0.0348622	1_uninjured_vs_1_injured_9day			Endothelial cells
Esm11	1.93538e-06	0.624883	0.106	0.03	0.0349898	1_uninjured_vs_1_injured_9day			Endothelial cells
Fcgrt3	1.9514e-06	0.399491	0.431	0.285	0.0352794	1_uninjured_vs_1_injured_9day			Endothelial cells
Aplnr1	1.97264e-06	-0.49489	0.167	0.3	0.0356634	1_uninjured_vs_1_injured_9day			Endothelial cells
Pgs1	2.01927e-06	-0.304827	0.039	0.125	0.0365065	1_uninjured_vs_1_injured_9day			Endothelial cells
Adamts91	2.18175e-06	-0.742936	0.183	0.31	0.0394439	1_uninjured_vs_1_injured_9day			Endothelial cells
Fkbp52	2.20382e-06	-0.361145	0.039	0.125	0.0398429	1_uninjured_vs_1_injured_9day			Endothelial cells
Cxcl13	2.23958e-06	-1.24393	0.172	0.289	0.0404893	1_uninjured_vs_1_injured_9day			Endothelial cells
Ier24	2.34307e-06	-0.586155	0.679	0.736	0.0423603	1_uninjured_vs_1_injured_9day			Endothelial cells
Pde4b1	2.5182e-06	-0.819017	0.188	0.308	0.0455266	1_uninjured_vs_1_injured_9day			Endothelial cells
Ceacam11	2.52238e-06	0.41546	0.193	0.086	0.0456021	1_uninjured_vs_1_injured_9day			Endothelial cells
Gstm22	2.56647e-06	0.416775	0.186	0.086	0.0463992	1_uninjured_vs_1_injured_9day			Endothelial cells
Ddx53	2.57293e-06	0.279041	0.876	0.772	0.046516	1_uninjured_vs_1_injured_9day			Endothelial cells
Cyth31	2.6469e-06	0.433448	0.188	0.086	0.0478533	1_uninjured_vs_1_injured_9day			Endothelial cells
Rps151	2.73439e-06	0.277559	0.872	0.766	0.049435	1_uninjured_vs_1_injured_9day			Endothelial cells

## Sheet: Endoneurial fibroblasts
	p_val	avg_log2FC	pct.1	pct.2	p_val_adj	comparison
Spp17	1.20751e-62	2.65448	0.948	0.648	2.18305e-58	2_injured_3day_vs_2_injured_9day		Endoneurial fibroblasts
Ctsl5	1.04419e-56	1.83837	0.945	0.769	1.8878e-52	2_injured_3day_vs_2_injured_9day		Endoneurial fibroblasts
Gm100767	1.67436e-55	2.07157	0.793	0.383	3.02707e-51	2_injured_3day_vs_2_injured_9day		Endoneurial fibroblasts
Rpsa-ps105	3.86531e-54	1.98609	0.761	0.296	6.98809e-50	2_injured_3day_vs_2_injured_9day		Endoneurial fibroblasts
Gm100737	8.89185e-50	1.67867	0.722	0.247	1.60756e-45	2_injured_3day_vs_2_injured_9day		Endoneurial fibroblasts
Pabpc17	4.46131e-49	1.19733	0.964	0.835	8.0656e-45	2_injured_3day_vs_2_injured_9day		Endoneurial fibroblasts
Wdr896	4.86285e-48	1.57459	0.854	0.591	8.79154e-44	2_injured_3day_vs_2_injured_9day		Endoneurial fibroblasts
Rpl21-ps45	3.43828e-46	1.78701	0.608	0.141	6.21607e-42	2_injured_3day_vs_2_injured_9day		Endoneurial fibroblasts
Gm84446	4.50132e-46	1.59236	0.576	0.1	8.13794e-42	2_injured_3day_vs_2_injured_9day		Endoneurial fibroblasts
Gm175416	8.59788e-45	1.40266	0.534	0.067	1.55441e-40	2_injured_3day_vs_2_injured_9day		Endoneurial fibroblasts
Gm102887	5.97606e-44	1.87227	0.676	0.254	1.08041e-39	2_injured_3day_vs_2_injured_9day		Endoneurial fibroblasts
Gm39407	1.25519e-42	1.3981	0.56	0.098	2.26925e-38	2_injured_3day_vs_2_injured_9day		Endoneurial fibroblasts
Lum4	2.58579e-42	-0.822969	0.968	0.99	4.67485e-38	2_injured_3day_vs_2_injured_9day		Endoneurial fibroblasts
Gm224265	6.05896e-42	1.24116	0.537	0.077	1.0954e-37	2_injured_3day_vs_2_injured_9day		Endoneurial fibroblasts
Apod5	1.52416e-41	-0.933475	0.997	0.997	2.75552e-37	2_injured_3day_vs_2_injured_9day		Endoneurial fibroblasts
Gm52445	3.09256e-41	1.10859	0.466	0.039	5.59104e-37	2_injured_3day_vs_2_injured_9day		Endoneurial fibroblasts
Rpl416	3.37736e-40	1.12829	0.893	0.73	6.10594e-36	2_injured_3day_vs_2_injured_9day		Endoneurial fibroblasts
Gm227616	8.81062e-40	1.28003	0.482	0.059	1.59287e-35	2_injured_3day_vs_2_injured_9day		Endoneurial fibroblasts
Rpl9-ps67	1.81778e-39	1.42936	0.628	0.201	3.28637e-35	2_injured_3day_vs_2_injured_9day		Endoneurial fibroblasts
Mir6827	1.82454e-39	1.3164	0.57	0.129	3.29859e-35	2_injured_3day_vs_2_injured_9day		Endoneurial fibroblasts
Cst37	4.30764e-39	-1.55996	0.822	0.853	7.78777e-35	2_injured_3day_vs_2_injured_9day		Endoneurial fibroblasts
Mmp26	1.61332e-38	-1.12774	0.867	0.889	2.91673e-34	2_injured_3day_vs_2_injured_9day		Endoneurial fibroblasts
Gm102608	2.04289e-38	1.47966	0.77	0.455	3.69334e-34	2_injured_3day_vs_2_injured_9day		Endoneurial fibroblasts
Gm102698	5.728e-38	1.39687	0.657	0.242	1.03557e-33	2_injured_3day_vs_2_injured_9day		Endoneurial fibroblasts
Rpl347	4.51116e-37	1.51262	0.725	0.383	8.15572e-33	2_injured_3day_vs_2_injured_9day		Endoneurial fibroblasts
Rps10-ps16	6.11379e-36	1.38485	0.748	0.445	1.10531e-31	2_injured_3day_vs_2_injured_9day		Endoneurial fibroblasts
Rpl13-ps37	5.22272e-35	1.51962	0.667	0.314	9.44216e-31	2_injured_3day_vs_2_injured_9day		Endoneurial fibroblasts
Serping15	2.56166e-34	-1.51366	0.722	0.81	4.63123e-30	2_injured_3day_vs_2_injured_9day		Endoneurial fibroblasts
Tmsb106	2.77153e-34	1.48597	0.796	0.514	5.01066e-30	2_injured_3day_vs_2_injured_9day		Endoneurial fibroblasts
Rps26-ps16	5.06869e-34	1.46879	0.773	0.501	9.16369e-30	2_injured_3day_vs_2_injured_9day		Endoneurial fibroblasts
Rpl13a-ps16	8.8432e-34	1.10163	0.557	0.154	1.59876e-29	2_injured_3day_vs_2_injured_9day		Endoneurial fibroblasts
S100a66	9.5413e-34	0.957909	0.951	0.869	1.72497e-29	2_injured_3day_vs_2_injured_9day		Endoneurial fibroblasts
Nfkbia5	1.92842e-33	-2.17809	0.421	0.717	3.4864e-29	2_injured_3day_vs_2_injured_9day		Endoneurial fibroblasts
Cenpq5	3.93714e-33	1.08484	0.424	0.051	7.11796e-29	2_injured_3day_vs_2_injured_9day		Endoneurial fibroblasts
Gm175115	8.29976e-33	0.982454	0.46	0.075	1.50051e-28	2_injured_3day_vs_2_injured_9day		Endoneurial fibroblasts
Gm65765	1.67583e-32	1.27683	0.553	0.159	3.02973e-28	2_injured_3day_vs_2_injured_9day		Endoneurial fibroblasts
Rpl308	6.6474e-32	1.28836	0.641	0.265	1.20178e-27	2_injured_3day_vs_2_injured_9day		Endoneurial fibroblasts
Gm103206	2.22865e-31	1.37341	0.647	0.296	4.02918e-27	2_injured_3day_vs_2_injured_9day		Endoneurial fibroblasts
Ptrf6	2.63281e-31	1.17912	0.848	0.625	4.75986e-27	2_injured_3day_vs_2_injured_9day		Endoneurial fibroblasts
Gm20006	1.97987e-30	1.44096	0.566	0.211	3.5794e-26	2_injured_3day_vs_2_injured_9day		Endoneurial fibroblasts
Col2a12	2.55438e-30	1.47223	0.605	0.203	4.61807e-26	2_injured_3day_vs_2_injured_9day		Endoneurial fibroblasts
Gm102636	3.92444e-30	1.46156	0.722	0.45	7.095e-26	2_injured_3day_vs_2_injured_9day		Endoneurial fibroblasts
Itm2a6	1.00108e-29	-1.33297	0.838	0.841	1.80985e-25	2_injured_3day_vs_2_injured_9day		Endoneurial fibroblasts
Rpsa7	1.12044e-29	1.03291	0.786	0.524	2.02564e-25	2_injured_3day_vs_2_injured_9day		Endoneurial fibroblasts
Orc56	1.41956e-29	1.26516	0.657	0.311	2.56641e-25	2_injured_3day_vs_2_injured_9day		Endoneurial fibroblasts
mt-Rnr25	1.65274e-29	-0.942024	0.961	0.974	2.98799e-25	2_injured_3day_vs_2_injured_9day		Endoneurial fibroblasts
Gm174306	1.1803e-28	0.966446	0.443	0.093	2.13386e-24	2_injured_3day_vs_2_injured_9day		Endoneurial fibroblasts
Rpl236	2.97038e-28	1.02117	0.825	0.614	5.37014e-24	2_injured_3day_vs_2_injured_9day		Endoneurial fibroblasts
Rplp26	8.82428e-28	0.88434	0.871	0.699	1.59534e-23	2_injured_3day_vs_2_injured_9day		Endoneurial fibroblasts
Rps247	1.44443e-27	0.793082	0.913	0.751	2.61139e-23	2_injured_3day_vs_2_injured_9day		Endoneurial fibroblasts
Gm118085	3.48412e-27	0.935509	0.327	0.026	6.29894e-23	2_injured_3day_vs_2_injured_9day		Endoneurial fibroblasts
Igfbp75	4.49871e-27	-0.94713	0.864	0.895	8.13322e-23	2_injured_3day_vs_2_injured_9day		Endoneurial fibroblasts
Anxa25	2.18631e-26	0.93124	0.883	0.694	3.95264e-22	2_injured_3day_vs_2_injured_9day		Endoneurial fibroblasts
Gm227596	2.84463e-26	0.720055	0.343	0.036	5.1428e-22	2_injured_3day_vs_2_injured_9day		Endoneurial fibroblasts
Gm249515	3.63516e-26	0.874152	0.301	0.018	6.57201e-22	2_injured_3day_vs_2_injured_9day		Endoneurial fibroblasts
Gm102757	6.86803e-26	1.08283	0.673	0.398	1.24167e-21	2_injured_3day_vs_2_injured_9day		Endoneurial fibroblasts
Rpl37a6	2.69669e-25	0.969571	0.809	0.64	4.87535e-21	2_injured_3day_vs_2_injured_9day		Endoneurial fibroblasts
Itgb33	3.05595e-24	1.22105	0.45	0.123	5.52485e-20	2_injured_3day_vs_2_injured_9day		Endoneurial fibroblasts
Rps257	3.26145e-24	1.1534	0.654	0.396	5.89637e-20	2_injured_3day_vs_2_injured_9day		Endoneurial fibroblasts
Fn17	3.73033e-24	0.845851	0.958	0.9	6.74407e-20	2_injured_3day_vs_2_injured_9day		Endoneurial fibroblasts
Rpl18a8	3.8321e-24	1.14511	0.68	0.409	6.92804e-20	2_injured_3day_vs_2_injured_9day		Endoneurial fibroblasts
Rps3a25	5.94156e-24	0.794806	0.32	0.039	1.07417e-19	2_injured_3day_vs_2_injured_9day		Endoneurial fibroblasts
Rpl397	9.03029e-24	0.948922	0.88	0.697	1.63259e-19	2_injured_3day_vs_2_injured_9day		Endoneurial fibroblasts
Tgfbi6	1.20992e-23	0.878024	0.929	0.792	2.18742e-19	2_injured_3day_vs_2_injured_9day		Endoneurial fibroblasts
Cspg42	1.80689e-23	1.28602	0.521	0.193	3.26667e-19	2_injured_3day_vs_2_injured_9day		Endoneurial fibroblasts
Rps186	2.08191e-23	1.05364	0.427	0.111	3.76388e-19	2_injured_3day_vs_2_injured_9day		Endoneurial fibroblasts
Rpl36-ps37	2.09323e-23	1.03449	0.495	0.167	3.78436e-19	2_injured_3day_vs_2_injured_9day		Endoneurial fibroblasts
Gm49685	2.48693e-23	0.759868	0.346	0.057	4.49611e-19	2_injured_3day_vs_2_injured_9day		Endoneurial fibroblasts
Rps207	3.36061e-23	0.711389	0.909	0.802	6.07564e-19	2_injured_3day_vs_2_injured_9day		Endoneurial fibroblasts
Rpl145	6.74377e-23	0.844099	0.864	0.674	1.21921e-18	2_injured_3day_vs_2_injured_9day		Endoneurial fibroblasts
Timp16	7.45883e-23	0.99676	0.871	0.684	1.34848e-18	2_injured_3day_vs_2_injured_9day		Endoneurial fibroblasts
Gm150136	1.29852e-22	0.888918	0.327	0.046	2.34759e-18	2_injured_3day_vs_2_injured_9day		Endoneurial fibroblasts
Mir692-16	1.34296e-22	1.02135	0.479	0.165	2.42794e-18	2_injured_3day_vs_2_injured_9day		Endoneurial fibroblasts
Gm42045	1.5633e-22	0.825485	0.531	0.198	2.82629e-18	2_injured_3day_vs_2_injured_9day		Endoneurial fibroblasts
Rpl376	1.77005e-22	1.02622	0.783	0.584	3.20007e-18	2_injured_3day_vs_2_injured_9day		Endoneurial fibroblasts
Gm98435	1.83228e-22	0.884864	0.767	0.578	3.31258e-18	2_injured_3day_vs_2_injured_9day		Endoneurial fibroblasts
Igf17	1.8807e-22	-1.27149	0.767	0.823	3.40011e-18	2_injured_3day_vs_2_injured_9day		Endoneurial fibroblasts
Eef1b27	2.04053e-22	0.814985	0.867	0.689	3.68908e-18	2_injured_3day_vs_2_injured_9day		Endoneurial fibroblasts
Rpl136	2.70119e-22	0.822939	0.809	0.625	4.88347e-18	2_injured_3day_vs_2_injured_9day		Endoneurial fibroblasts
Dcn6	3.07607e-22	-0.396557	0.997	0.997	5.56123e-18	2_injured_3day_vs_2_injured_9day		Endoneurial fibroblasts
Rps268	3.10342e-22	0.82437	0.893	0.753	5.61067e-18	2_injured_3day_vs_2_injured_9day		Endoneurial fibroblasts
Gm240985	3.53207e-22	0.562319	0.259	0.015	6.38562e-18	2_injured_3day_vs_2_injured_9day		Endoneurial fibroblasts
S100a105	4.00425e-22	0.936518	0.812	0.576	7.23928e-18	2_injured_3day_vs_2_injured_9day		Endoneurial fibroblasts
Rpl357	2.44827e-21	0.980733	0.583	0.272	4.42622e-17	2_injured_3day_vs_2_injured_9day		Endoneurial fibroblasts
Lgals18	4.18264e-21	0.720878	0.961	0.823	7.56179e-17	2_injured_3day_vs_2_injured_9day		Endoneurial fibroblasts
Ugcg8	4.36339e-21	-1.38984	0.362	0.63	7.88857e-17	2_injured_3day_vs_2_injured_9day		Endoneurial fibroblasts
Ndufa43	5.23833e-21	0.938958	0.764	0.542	9.47037e-17	2_injured_3day_vs_2_injured_9day		Endoneurial fibroblasts
Rps87	7.58308e-21	0.772443	0.832	0.65	1.37095e-16	2_injured_3day_vs_2_injured_9day		Endoneurial fibroblasts
Gm51606	9.15717e-21	0.783202	0.385	0.098	1.65553e-16	2_injured_3day_vs_2_injured_9day		Endoneurial fibroblasts
Rplp15	1.4925e-20	0.537751	0.939	0.877	2.6983e-16	2_injured_3day_vs_2_injured_9day		Endoneurial fibroblasts
Gpc35	2.69478e-20	-0.679879	0.9	0.892	4.8719e-16	2_injured_3day_vs_2_injured_9day		Endoneurial fibroblasts
Rps217	4.83405e-20	0.706507	0.906	0.779	8.73947e-16	2_injured_3day_vs_2_injured_9day		Endoneurial fibroblasts
Ckap47	6.19432e-20	0.941036	0.761	0.542	1.11987e-15	2_injured_3day_vs_2_injured_9day		Endoneurial fibroblasts
Gm81866	1.13244e-19	0.859915	0.405	0.116	2.04733e-15	2_injured_3day_vs_2_injured_9day		Endoneurial fibroblasts
Lbp5	2.61009e-19	-1.6925	0.382	0.617	4.71879e-15	2_injured_3day_vs_2_injured_9day		Endoneurial fibroblasts
Rps167	2.74485e-19	0.93128	0.602	0.314	4.96241e-15	2_injured_3day_vs_2_injured_9day		Endoneurial fibroblasts
Eif2s25	2.99188e-19	0.919387	0.683	0.427	5.40902e-15	2_injured_3day_vs_2_injured_9day		Endoneurial fibroblasts
Rps286	3.1711e-19	0.910888	0.722	0.501	5.73303e-15	2_injured_3day_vs_2_injured_9day		Endoneurial fibroblasts
Scn7a4	4.97847e-19	-1.37849	0.304	0.573	9.00057e-15	2_injured_3day_vs_2_injured_9day		Endoneurial fibroblasts
Gm225825	6.97572e-19	0.530454	0.227	0.015	1.26114e-14	2_injured_3day_vs_2_injured_9day		Endoneurial fibroblasts
Gm119835	1.17795e-18	0.580497	0.204	0.008	2.12962e-14	2_injured_3day_vs_2_injured_9day		Endoneurial fibroblasts
Rpl115	1.30143e-18	0.874194	0.589	0.352	2.35285e-14	2_injured_3day_vs_2_injured_9day		Endoneurial fibroblasts
Gm49533	1.38021e-18	0.410715	0.197	0.005	2.49527e-14	2_injured_3day_vs_2_injured_9day		Endoneurial fibroblasts
Rps4x6	1.47181e-18	0.84667	0.757	0.594	2.66088e-14	2_injured_3day_vs_2_injured_9day		Endoneurial fibroblasts
Rpl22l16	2.86392e-18	0.906382	0.796	0.614	5.17769e-14	2_injured_3day_vs_2_injured_9day		Endoneurial fibroblasts
Swi53	3.13536e-18	0.784313	0.744	0.55	5.66841e-14	2_injured_3day_vs_2_injured_9day		Endoneurial fibroblasts
Foxd11	4.54104e-18	1.13502	0.528	0.247	8.20975e-14	2_injured_3day_vs_2_injured_9day		Endoneurial fibroblasts
Cxcl17	4.59317e-18	-1.92663	0.437	0.65	8.304e-14	2_injured_3day_vs_2_injured_9day		Endoneurial fibroblasts
Vim6	8.11566e-18	0.686595	0.926	0.817	1.46723e-13	2_injured_3day_vs_2_injured_9day		Endoneurial fibroblasts
Rbp44	9.85684e-18	0.9393	0.317	0.072	1.78202e-13	2_injured_3day_vs_2_injured_9day		Endoneurial fibroblasts
Gm78086	1.50618e-17	0.870977	0.479	0.198	2.72303e-13	2_injured_3day_vs_2_injured_9day		Endoneurial fibroblasts
Crip18	2.07205e-17	0.88502	0.767	0.568	3.74605e-13	2_injured_3day_vs_2_injured_9day		Endoneurial fibroblasts
Ccnd14	2.1728e-17	0.944395	0.638	0.37	3.9282e-13	2_injured_3day_vs_2_injured_9day		Endoneurial fibroblasts
Rps3a38	2.45577e-17	0.613262	0.751	0.455	4.43979e-13	2_injured_3day_vs_2_injured_9day		Endoneurial fibroblasts
Rpl386	2.56454e-17	0.820143	0.615	0.368	4.63643e-13	2_injured_3day_vs_2_injured_9day		Endoneurial fibroblasts
Rps3a17	3.07375e-17	0.758388	0.819	0.65	5.55704e-13	2_injured_3day_vs_2_injured_9day		Endoneurial fibroblasts
Pdap16	3.33387e-17	0.774543	0.68	0.411	6.0273e-13	2_injured_3day_vs_2_injured_9day		Endoneurial fibroblasts
Rpl10-ps35	3.70077e-17	0.921678	0.327	0.082	6.69061e-13	2_injured_3day_vs_2_injured_9day		Endoneurial fibroblasts
Rpl35a6	4.93422e-17	0.981924	0.599	0.332	8.92057e-13	2_injured_3day_vs_2_injured_9day		Endoneurial fibroblasts
Gm255955	5.71552e-17	0.348087	0.175	0.003	1.03331e-12	2_injured_3day_vs_2_injured_9day		Endoneurial fibroblasts
Reln1	5.91032e-17	0.817286	0.369	0.113	1.06853e-12	2_injured_3day_vs_2_injured_9day		Endoneurial fibroblasts
Ddb14	6.1133e-17	0.903618	0.644	0.398	1.10522e-12	2_injured_3day_vs_2_injured_9day		Endoneurial fibroblasts
Rpl123	8.79531e-17	0.589426	0.437	0.167	1.5901e-12	2_injured_3day_vs_2_injured_9day		Endoneurial fibroblasts
Gjb51	1.47648e-16	0.818298	0.294	0.064	2.66932e-12	2_injured_3day_vs_2_injured_9day		Endoneurial fibroblasts
Gm102507	1.52344e-16	0.600524	0.531	0.249	2.75423e-12	2_injured_3day_vs_2_injured_9day		Endoneurial fibroblasts
Sec61b7	1.56818e-16	0.880293	0.728	0.532	2.83511e-12	2_injured_3day_vs_2_injured_9day		Endoneurial fibroblasts
Rps196	1.79376e-16	0.924981	0.803	0.622	3.24293e-12	2_injured_3day_vs_2_injured_9day		Endoneurial fibroblasts
Gm61335	2.85724e-16	0.526951	0.243	0.036	5.16561e-12	2_injured_3day_vs_2_injured_9day		Endoneurial fibroblasts
S100a118	2.86567e-16	0.813111	0.809	0.627	5.18084e-12	2_injured_3day_vs_2_injured_9day		Endoneurial fibroblasts
Enpp25	3.28503e-16	0.887135	0.456	0.183	5.939e-12	2_injured_3day_vs_2_injured_9day		Endoneurial fibroblasts
Hspa57	3.34093e-16	-0.628057	0.877	0.91	6.04008e-12	2_injured_3day_vs_2_injured_9day		Endoneurial fibroblasts
Uqcr115	3.36352e-16	0.789138	0.647	0.414	6.08091e-12	2_injured_3day_vs_2_injured_9day		Endoneurial fibroblasts
Rtn47	4.32572e-16	0.69575	0.735	0.524	7.82046e-12	2_injured_3day_vs_2_injured_9day		Endoneurial fibroblasts
S100a46	5.32485e-16	0.701896	0.414	0.139	9.62679e-12	2_injured_3day_vs_2_injured_9day		Endoneurial fibroblasts
Myadm4	6.70421e-16	0.923723	0.528	0.26	1.21205e-11	2_injured_3day_vs_2_injured_9day		Endoneurial fibroblasts
Smoc27	7.60327e-16	-1.35698	0.602	0.73	1.3746e-11	2_injured_3day_vs_2_injured_9day		Endoneurial fibroblasts
Mdk4	8.08408e-16	-1.18625	0.34	0.566	1.46152e-11	2_injured_3day_vs_2_injured_9day		Endoneurial fibroblasts
Gm52775	9.88381e-16	0.437559	0.207	0.021	1.78689e-11	2_injured_3day_vs_2_injured_9day		Endoneurial fibroblasts
Lmna7	1.14449e-15	0.796942	0.712	0.465	2.06912e-11	2_injured_3day_vs_2_injured_9day		Endoneurial fibroblasts
Atp5g36	1.20627e-15	0.776377	0.725	0.519	2.18082e-11	2_injured_3day_vs_2_injured_9day		Endoneurial fibroblasts
Gm170876	1.2691e-15	0.600136	0.236	0.036	2.29441e-11	2_injured_3day_vs_2_injured_9day		Endoneurial fibroblasts
Lgals34	1.89245e-15	0.527264	0.544	0.262	3.42137e-11	2_injured_3day_vs_2_injured_9day		Endoneurial fibroblasts
Wif12	1.98332e-15	-1.28699	0.718	0.771	3.58565e-11	2_injured_3day_vs_2_injured_9day		Endoneurial fibroblasts
Gm49503	2.15623e-15	0.459967	0.278	0.059	3.89824e-11	2_injured_3day_vs_2_injured_9day		Endoneurial fibroblasts
Ppic6	3.83676e-15	-1.06621	0.709	0.728	6.93648e-11	2_injured_3day_vs_2_injured_9day		Endoneurial fibroblasts
Tpm3-rs77	4.54745e-15	0.980655	0.54	0.298	8.22133e-11	2_injured_3day_vs_2_injured_9day		Endoneurial fibroblasts
Rpl227	4.70073e-15	0.61689	0.822	0.684	8.49844e-11	2_injured_3day_vs_2_injured_9day		Endoneurial fibroblasts
Gadd45b6	5.08487e-15	-1.3232	0.133	0.38	9.19293e-11	2_injured_3day_vs_2_injured_9day		Endoneurial fibroblasts
Ctsh7	7.025e-15	0.852897	0.67	0.432	1.27005e-10	2_injured_3day_vs_2_injured_9day		Endoneurial fibroblasts
Lepr6	7.65569e-15	-1.24334	0.165	0.416	1.38407e-10	2_injured_3day_vs_2_injured_9day		Endoneurial fibroblasts
Eif5b6	8.10804e-15	0.95182	0.702	0.499	1.46585e-10	2_injured_3day_vs_2_injured_9day		Endoneurial fibroblasts
Rpl327	9.20803e-15	0.604967	0.887	0.735	1.66472e-10	2_injured_3day_vs_2_injured_9day		Endoneurial fibroblasts
Rps125	1.12906e-14	0.659832	0.366	0.123	2.04122e-10	2_injured_3day_vs_2_injured_9day		Endoneurial fibroblasts
Gm94936	1.44467e-14	0.661728	0.33	0.103	2.61181e-10	2_injured_3day_vs_2_injured_9day		Endoneurial fibroblasts
Gm56115	1.49869e-14	0.395286	0.204	0.026	2.70949e-10	2_injured_3day_vs_2_injured_9day		Endoneurial fibroblasts
Flna7	1.54301e-14	0.591492	0.592	0.321	2.78961e-10	2_injured_3day_vs_2_injured_9day		Endoneurial fibroblasts
Gm248655	1.85371e-14	0.495543	0.181	0.015	3.35133e-10	2_injured_3day_vs_2_injured_9day		Endoneurial fibroblasts
Gm64727	2.18815e-14	0.674258	0.634	0.437	3.95596e-10	2_injured_3day_vs_2_injured_9day		Endoneurial fibroblasts
Rpl9-ps15	2.84676e-14	0.667797	0.204	0.026	5.14666e-10	2_injured_3day_vs_2_injured_9day		Endoneurial fibroblasts
Rpl27a7	3.25024e-14	0.715821	0.628	0.398	5.87611e-10	2_injured_3day_vs_2_injured_9day		Endoneurial fibroblasts
Gm100366	4.4626e-14	0.846937	0.337	0.108	8.06793e-10	2_injured_3day_vs_2_injured_9day		Endoneurial fibroblasts
Eef1g6	4.54644e-14	0.686238	0.67	0.47	8.21952e-10	2_injured_3day_vs_2_injured_9day		Endoneurial fibroblasts
Nfkbiz8	5.44431e-14	-1.38222	0.372	0.584	9.84276e-10	2_injured_3day_vs_2_injured_9day		Endoneurial fibroblasts
Gm82255	5.48221e-14	0.518242	0.217	0.033	9.91129e-10	2_injured_3day_vs_2_injured_9day		Endoneurial fibroblasts
Ndufa19	6.3226e-14	0.562006	0.621	0.375	1.14306e-09	2_injured_3day_vs_2_injured_9day		Endoneurial fibroblasts
Zkscan16	6.67171e-14	0.695841	0.388	0.147	1.20618e-09	2_injured_3day_vs_2_injured_9day		Endoneurial fibroblasts
Itgam3	6.82204e-14	0.405619	0.188	0.021	1.23336e-09	2_injured_3day_vs_2_injured_9day		Endoneurial fibroblasts
Gm101266	8.22584e-14	0.476201	0.217	0.036	1.48715e-09	2_injured_3day_vs_2_injured_9day		Endoneurial fibroblasts
Oaf4	1.15626e-13	0.765655	0.676	0.483	2.0904e-09	2_injured_3day_vs_2_injured_9day		Endoneurial fibroblasts
Thbs45	1.18528e-13	-0.574892	0.864	0.856	2.14287e-09	2_injured_3day_vs_2_injured_9day		Endoneurial fibroblasts
Steap43	1.19134e-13	-1.444	0.502	0.653	2.15383e-09	2_injured_3day_vs_2_injured_9day		Endoneurial fibroblasts
Gm87307	1.45306e-13	0.808324	0.534	0.301	2.627e-09	2_injured_3day_vs_2_injured_9day		Endoneurial fibroblasts
Csrp16	1.55789e-13	0.825804	0.489	0.26	2.81651e-09	2_injured_3day_vs_2_injured_9day		Endoneurial fibroblasts
Rps15a6	1.60691e-13	0.5919	0.845	0.715	2.90513e-09	2_injured_3day_vs_2_injured_9day		Endoneurial fibroblasts
Gm112735	1.75461e-13	0.605187	0.272	0.069	3.17216e-09	2_injured_3day_vs_2_injured_9day		Endoneurial fibroblasts
Gm107845	1.9978e-13	0.278425	0.201	0.028	3.61181e-09	2_injured_3day_vs_2_injured_9day		Endoneurial fibroblasts
Usmg55	2.62446e-13	0.60762	0.443	0.206	4.74477e-09	2_injured_3day_vs_2_injured_9day		Endoneurial fibroblasts
Gm230615	2.85656e-13	0.566594	0.175	0.018	5.16438e-09	2_injured_3day_vs_2_injured_9day		Endoneurial fibroblasts
Tmem2456	4.00342e-13	0.709606	0.388	0.152	7.23778e-09	2_injured_3day_vs_2_injured_9day		Endoneurial fibroblasts
Rps218	4.47384e-13	0.552292	0.343	0.118	8.08826e-09	2_injured_3day_vs_2_injured_9day		Endoneurial fibroblasts
Trabd2b4	4.63428e-13	0.620067	0.579	0.329	8.37832e-09	2_injured_3day_vs_2_injured_9day		Endoneurial fibroblasts
Lrrc588	4.63465e-13	0.85339	0.644	0.481	8.37898e-09	2_injured_3day_vs_2_injured_9day		Endoneurial fibroblasts
Eif3j25	5.3686e-13	0.563139	0.301	0.09	9.70589e-09	2_injured_3day_vs_2_injured_9day		Endoneurial fibroblasts
Lap33	7.68405e-13	0.701812	0.515	0.283	1.3892e-08	2_injured_3day_vs_2_injured_9day		Endoneurial fibroblasts
Atp5j22	7.87848e-13	0.69709	0.689	0.514	1.42435e-08	2_injured_3day_vs_2_injured_9day		Endoneurial fibroblasts
Gm227605	8.01595e-13	0.3537	0.139	0.005	1.4492e-08	2_injured_3day_vs_2_injured_9day		Endoneurial fibroblasts
Calm34	8.47054e-13	0.589429	0.625	0.388	1.53139e-08	2_injured_3day_vs_2_injured_9day		Endoneurial fibroblasts
Cfh4	8.57312e-13	-1.16132	0.301	0.506	1.54993e-08	2_injured_3day_vs_2_injured_9day		Endoneurial fibroblasts
Vtn4	9.44685e-13	-0.893055	0.094	0.314	1.7079e-08	2_injured_3day_vs_2_injured_9day		Endoneurial fibroblasts
Metrn1	1.10095e-12	0.649078	0.239	0.057	1.99041e-08	2_injured_3day_vs_2_injured_9day		Endoneurial fibroblasts
Gm48254	1.7521e-12	0.52307	0.149	0.01	3.16762e-08	2_injured_3day_vs_2_injured_9day		Endoneurial fibroblasts
Kdelr26	1.77185e-12	0.599061	0.738	0.532	3.20333e-08	2_injured_3day_vs_2_injured_9day		Endoneurial fibroblasts
Cox174	1.80484e-12	0.812222	0.547	0.319	3.26297e-08	2_injured_3day_vs_2_injured_9day		Endoneurial fibroblasts
Cyp2s1	2.00519e-12	0.492448	0.282	0.08	3.62518e-08	2_injured_3day_vs_2_injured_9day		Endoneurial fibroblasts
Atp5k6	2.10677e-12	0.651888	0.618	0.386	3.80882e-08	2_injured_3day_vs_2_injured_9day		Endoneurial fibroblasts
Col28a12	2.21516e-12	-1.04774	0.576	0.681	4.0048e-08	2_injured_3day_vs_2_injured_9day		Endoneurial fibroblasts
Surf46	2.53229e-12	0.598667	0.657	0.468	4.57812e-08	2_injured_3day_vs_2_injured_9day		Endoneurial fibroblasts
Ndrg41	2.77057e-12	0.495569	0.194	0.033	5.00891e-08	2_injured_3day_vs_2_injured_9day		Endoneurial fibroblasts
Pkm6	2.80169e-12	0.79878	0.605	0.411	5.06518e-08	2_injured_3day_vs_2_injured_9day		Endoneurial fibroblasts
Ppp3ca5	3.24715e-12	0.754874	0.66	0.447	5.87052e-08	2_injured_3day_vs_2_injured_9day		Endoneurial fibroblasts
Etv4	3.3671e-12	0.288767	0.317	0.1	6.08739e-08	2_injured_3day_vs_2_injured_9day		Endoneurial fibroblasts
Sez63	3.38971e-12	0.402823	0.126	0.003	6.12826e-08	2_injured_3day_vs_2_injured_9day		Endoneurial fibroblasts
Col14a16	3.41974e-12	0.733605	0.502	0.254	6.18256e-08	2_injured_3day_vs_2_injured_9day		Endoneurial fibroblasts
Adra2a1	3.577e-12	-0.777044	0.013	0.172	6.46685e-08	2_injured_3day_vs_2_injured_9day		Endoneurial fibroblasts
Tnc6	3.60824e-12	0.809937	0.35	0.134	6.52333e-08	2_injured_3day_vs_2_injured_9day		Endoneurial fibroblasts
Emilin24	3.72848e-12	0.501105	0.375	0.144	6.74071e-08	2_injured_3day_vs_2_injured_9day		Endoneurial fibroblasts
B020018G12Rik4	3.85462e-12	0.425805	0.239	0.057	6.96878e-08	2_injured_3day_vs_2_injured_9day		Endoneurial fibroblasts
Nme17	4.01314e-12	0.521775	0.599	0.368	7.25536e-08	2_injured_3day_vs_2_injured_9day		Endoneurial fibroblasts
Rps106	4.69352e-12	0.537672	0.845	0.722	8.48541e-08	2_injured_3day_vs_2_injured_9day		Endoneurial fibroblasts
Fabp47	4.88828e-12	0.546359	0.45	0.211	8.83753e-08	2_injured_3day_vs_2_injured_9day		Endoneurial fibroblasts
Gm98464	5.26104e-12	0.444436	0.311	0.103	9.51143e-08	2_injured_3day_vs_2_injured_9day		Endoneurial fibroblasts
Gm45405	5.34989e-12	0.547088	0.259	0.069	9.67207e-08	2_injured_3day_vs_2_injured_9day		Endoneurial fibroblasts
P4hb6	6.58017e-12	0.544252	0.809	0.702	1.18963e-07	2_injured_3day_vs_2_injured_9day		Endoneurial fibroblasts
Pgk13	6.8369e-12	0.585045	0.197	0.036	1.23604e-07	2_injured_3day_vs_2_injured_9day		Endoneurial fibroblasts
Aplp26	7.26544e-12	0.508204	0.56	0.326	1.31352e-07	2_injured_3day_vs_2_injured_9day		Endoneurial fibroblasts
Rps176	7.86161e-12	0.771894	0.359	0.144	1.4213e-07	2_injured_3day_vs_2_injured_9day		Endoneurial fibroblasts
Rpl21-ps65	7.93131e-12	0.406869	0.172	0.023	1.4339e-07	2_injured_3day_vs_2_injured_9day		Endoneurial fibroblasts
Ier28	8.36029e-12	-0.933657	0.689	0.787	1.51146e-07	2_injured_3day_vs_2_injured_9day		Endoneurial fibroblasts
Serpinh14	8.58681e-12	0.476392	0.871	0.753	1.55241e-07	2_injured_3day_vs_2_injured_9day		Endoneurial fibroblasts
Svil7	9.51165e-12	-0.980012	0.298	0.509	1.71961e-07	2_injured_3day_vs_2_injured_9day		Endoneurial fibroblasts
Gria12	9.78019e-12	-0.928107	0.129	0.339	1.76816e-07	2_injured_3day_vs_2_injured_9day		Endoneurial fibroblasts
Sned16	1.00807e-11	-1.04528	0.463	0.635	1.82248e-07	2_injured_3day_vs_2_injured_9day		Endoneurial fibroblasts
Gm231923	1.02848e-11	0.328765	0.113	0	1.85939e-07	2_injured_3day_vs_2_injured_9day		Endoneurial fibroblasts
Gm47072	1.20131e-11	0.400859	0.159	0.018	2.17185e-07	2_injured_3day_vs_2_injured_9day		Endoneurial fibroblasts
Reep53	1.21189e-11	0.546977	0.725	0.55	2.19097e-07	2_injured_3day_vs_2_injured_9day		Endoneurial fibroblasts
Hs6st24	1.36101e-11	-0.824525	0.045	0.224	2.46058e-07	2_injured_3day_vs_2_injured_9day		Endoneurial fibroblasts
Tbrg14	1.48423e-11	0.672556	0.638	0.419	2.68334e-07	2_injured_3day_vs_2_injured_9day		Endoneurial fibroblasts
Smtn5	1.48856e-11	0.607677	0.437	0.208	2.69116e-07	2_injured_3day_vs_2_injured_9day		Endoneurial fibroblasts
Rpl317	1.51998e-11	0.619798	0.553	0.332	2.74797e-07	2_injured_3day_vs_2_injured_9day		Endoneurial fibroblasts
Dnm12	1.60858e-11	0.580287	0.508	0.262	2.90814e-07	2_injured_3day_vs_2_injured_9day		Endoneurial fibroblasts
Cox5b3	1.63022e-11	0.781445	0.586	0.396	2.94728e-07	2_injured_3day_vs_2_injured_9day		Endoneurial fibroblasts
Gm262261	1.77622e-11	0.293156	0.133	0.008	3.21122e-07	2_injured_3day_vs_2_injured_9day		Endoneurial fibroblasts
Gm97903	1.81689e-11	0.325447	0.168	0.023	3.28476e-07	2_injured_3day_vs_2_injured_9day		Endoneurial fibroblasts
Mapk34	1.84723e-11	0.617019	0.366	0.147	3.33961e-07	2_injured_3day_vs_2_injured_9day		Endoneurial fibroblasts
C1s3	2.12533e-11	-0.902054	0.647	0.715	3.84238e-07	2_injured_3day_vs_2_injured_9day		Endoneurial fibroblasts
Pdp11	2.27598e-11	0.517172	0.311	0.111	4.11475e-07	2_injured_3day_vs_2_injured_9day		Endoneurial fibroblasts
Ndufa24	2.55833e-11	0.49774	0.735	0.522	4.6252e-07	2_injured_3day_vs_2_injured_9day		Endoneurial fibroblasts
Uqcrq3	2.88533e-11	0.525944	0.715	0.532	5.21638e-07	2_injured_3day_vs_2_injured_9day		Endoneurial fibroblasts
Serf24	3.23062e-11	0.596578	0.657	0.478	5.84063e-07	2_injured_3day_vs_2_injured_9day		Endoneurial fibroblasts
Gm123552	3.41226e-11	0.421697	0.172	0.026	6.16903e-07	2_injured_3day_vs_2_injured_9day		Endoneurial fibroblasts
Nap1l15	3.52108e-11	0.616763	0.592	0.396	6.36576e-07	2_injured_3day_vs_2_injured_9day		Endoneurial fibroblasts
Rpl28-ps43	3.72532e-11	0.320617	0.136	0.01	6.735e-07	2_injured_3day_vs_2_injured_9day		Endoneurial fibroblasts
Cd345	4.59376e-11	0.727586	0.673	0.476	8.30506e-07	2_injured_3day_vs_2_injured_9day		Endoneurial fibroblasts
Cox7b7	4.84481e-11	0.580084	0.709	0.542	8.75893e-07	2_injured_3day_vs_2_injured_9day		Endoneurial fibroblasts
Gm9774	5.07153e-11	0.287218	0.152	0.018	9.16881e-07	2_injured_3day_vs_2_injured_9day		Endoneurial fibroblasts
Rpl186	5.1001e-11	0.583004	0.696	0.555	9.22047e-07	2_injured_3day_vs_2_injured_9day		Endoneurial fibroblasts
Actg13	7.46339e-11	0.474964	0.265	0.082	1.34931e-06	2_injured_3day_vs_2_injured_9day		Endoneurial fibroblasts
Gnai23	7.47622e-11	0.577565	0.699	0.54	1.35163e-06	2_injured_3day_vs_2_injured_9day		Endoneurial fibroblasts
Gm239355	7.49206e-11	0.554689	0.236	0.062	1.35449e-06	2_injured_3day_vs_2_injured_9day		Endoneurial fibroblasts
Glipr25	7.53357e-11	0.687657	0.537	0.308	1.36199e-06	2_injured_3day_vs_2_injured_9day		Endoneurial fibroblasts
Atpif16	7.76689e-11	0.582141	0.728	0.566	1.40418e-06	2_injured_3day_vs_2_injured_9day		Endoneurial fibroblasts
Lasp13	8.89865e-11	0.490242	0.472	0.247	1.60879e-06	2_injured_3day_vs_2_injured_9day		Endoneurial fibroblasts
Ost44	9.00372e-11	0.724179	0.618	0.442	1.62778e-06	2_injured_3day_vs_2_injured_9day		Endoneurial fibroblasts
Actn45	9.07171e-11	0.662348	0.537	0.324	1.64007e-06	2_injured_3day_vs_2_injured_9day		Endoneurial fibroblasts
Pnrc16	1.03669e-10	-1.03855	0.392	0.56	1.87422e-06	2_injured_3day_vs_2_injured_9day		Endoneurial fibroblasts
Rcn14	1.11904e-10	0.498862	0.751	0.581	2.02311e-06	2_injured_3day_vs_2_injured_9day		Endoneurial fibroblasts
Ccnb22	1.13856e-10	0.506159	0.136	0.013	2.0584e-06	2_injured_3day_vs_2_injured_9day		Endoneurial fibroblasts
Fosb8	1.35912e-10	-0.933304	0.712	0.769	2.45716e-06	2_injured_3day_vs_2_injured_9day		Endoneurial fibroblasts
Myl65	1.43073e-10	0.595256	0.615	0.427	2.58661e-06	2_injured_3day_vs_2_injured_9day		Endoneurial fibroblasts
Atp5e4	1.46662e-10	0.492631	0.79	0.62	2.65151e-06	2_injured_3day_vs_2_injured_9day		Endoneurial fibroblasts
Ppp1r15a8	1.46943e-10	-1.08772	0.265	0.46	2.65659e-06	2_injured_3day_vs_2_injured_9day		Endoneurial fibroblasts
Icam13	1.49871e-10	-0.985412	0.165	0.368	2.70952e-06	2_injured_3day_vs_2_injured_9day		Endoneurial fibroblasts
Plod35	1.53622e-10	0.617065	0.599	0.396	2.77733e-06	2_injured_3day_vs_2_injured_9day		Endoneurial fibroblasts
Maged15	1.56127e-10	0.565471	0.715	0.519	2.82261e-06	2_injured_3day_vs_2_injured_9day		Endoneurial fibroblasts
Bcat13	1.72041e-10	0.308878	0.217	0.054	3.11033e-06	2_injured_3day_vs_2_injured_9day		Endoneurial fibroblasts
Fau5	1.72681e-10	0.541093	0.466	0.247	3.1219e-06	2_injured_3day_vs_2_injured_9day		Endoneurial fibroblasts
Mif5	1.93855e-10	0.676205	0.472	0.27	3.50471e-06	2_injured_3day_vs_2_injured_9day		Endoneurial fibroblasts
2010107E04Rik6	1.9794e-10	0.472391	0.663	0.512	3.57856e-06	2_injured_3day_vs_2_injured_9day		Endoneurial fibroblasts
Gm127283	2.1817e-10	0.442763	0.194	0.041	3.9443e-06	2_injured_3day_vs_2_injured_9day		Endoneurial fibroblasts
S100b2	2.22279e-10	0.388437	0.181	0.036	4.01859e-06	2_injured_3day_vs_2_injured_9day		Endoneurial fibroblasts
Gm54222	2.39303e-10	0.393955	0.155	0.023	4.32636e-06	2_injured_3day_vs_2_injured_9day		Endoneurial fibroblasts
Dapk3	2.61906e-10	0.282154	0.133	0.013	4.735e-06	2_injured_3day_vs_2_injured_9day		Endoneurial fibroblasts
Cyp26b13	2.75564e-10	0.951753	0.327	0.139	4.98193e-06	2_injured_3day_vs_2_injured_9day		Endoneurial fibroblasts
Add35	2.85693e-10	0.50584	0.693	0.524	5.16505e-06	2_injured_3day_vs_2_injured_9day		Endoneurial fibroblasts
Cdh115	3.02403e-10	-0.914618	0.243	0.45	5.46715e-06	2_injured_3day_vs_2_injured_9day		Endoneurial fibroblasts
Crispld25	3.75342e-10	0.663776	0.505	0.288	6.78581e-06	2_injured_3day_vs_2_injured_9day		Endoneurial fibroblasts
Limk1	3.86842e-10	0.46765	0.168	0.031	6.99371e-06	2_injured_3day_vs_2_injured_9day		Endoneurial fibroblasts
Gm49783	4.36877e-10	0.373009	0.129	0.013	7.89831e-06	2_injured_3day_vs_2_injured_9day		Endoneurial fibroblasts
Ecm28	4.40476e-10	-0.862875	0.126	0.321	7.96337e-06	2_injured_3day_vs_2_injured_9day		Endoneurial fibroblasts
Ldb25	4.72876e-10	0.438034	0.288	0.103	8.54913e-06	2_injured_3day_vs_2_injured_9day		Endoneurial fibroblasts
Sec134	5.16278e-10	0.64972	0.576	0.355	9.33378e-06	2_injured_3day_vs_2_injured_9day		Endoneurial fibroblasts
Gng54	5.26302e-10	0.542178	0.45	0.242	9.51502e-06	2_injured_3day_vs_2_injured_9day		Endoneurial fibroblasts
Cbx34	5.8111e-10	0.539336	0.353	0.157	1.05059e-05	2_injured_3day_vs_2_injured_9day		Endoneurial fibroblasts
Sh3bgrl37	6.00324e-10	0.555908	0.634	0.447	1.08533e-05	2_injured_3day_vs_2_injured_9day		Endoneurial fibroblasts
Igsf33	6.77153e-10	0.691175	0.456	0.244	1.22423e-05	2_injured_3day_vs_2_injured_9day		Endoneurial fibroblasts
Tmem2584	6.80751e-10	0.567063	0.689	0.512	1.23073e-05	2_injured_3day_vs_2_injured_9day		Endoneurial fibroblasts
Txn16	6.92763e-10	0.535541	0.728	0.586	1.25245e-05	2_injured_3day_vs_2_injured_9day		Endoneurial fibroblasts
Snrpg5	7.53486e-10	0.407553	0.56	0.355	1.36223e-05	2_injured_3day_vs_2_injured_9day		Endoneurial fibroblasts
2007-06-01	7.6442e-10	-0.633353	0.812	0.877	1.382e-05	2_injured_3day_vs_2_injured_9day		Endoneurial fibroblasts
Arpc55	7.68442e-10	0.650806	0.631	0.442	1.38927e-05	2_injured_3day_vs_2_injured_9day		Endoneurial fibroblasts
Gm100645	7.84659e-10	0.348575	0.139	0.018	1.41858e-05	2_injured_3day_vs_2_injured_9day		Endoneurial fibroblasts
Hdgf6	8.82586e-10	0.704371	0.498	0.29	1.59563e-05	2_injured_3day_vs_2_injured_9day		Endoneurial fibroblasts
Ywhaz5	9.14068e-10	0.346325	0.689	0.501	1.65254e-05	2_injured_3day_vs_2_injured_9day		Endoneurial fibroblasts
Jam24	9.46831e-10	0.474219	0.382	0.183	1.71178e-05	2_injured_3day_vs_2_injured_9day		Endoneurial fibroblasts
Il334	1.06556e-09	0.851116	0.673	0.496	1.92643e-05	2_injured_3day_vs_2_injured_9day		Endoneurial fibroblasts
Mlec4	1.0936e-09	0.628643	0.595	0.391	1.97712e-05	2_injured_3day_vs_2_injured_9day		Endoneurial fibroblasts
Hnrnpf6	1.20569e-09	0.613076	0.408	0.198	2.17978e-05	2_injured_3day_vs_2_injured_9day		Endoneurial fibroblasts
Rrbp14	1.20582e-09	0.496153	0.809	0.684	2.18e-05	2_injured_3day_vs_2_injured_9day		Endoneurial fibroblasts
Metrnl3	1.24219e-09	0.411517	0.301	0.116	2.24576e-05	2_injured_3day_vs_2_injured_9day		Endoneurial fibroblasts
Calu4	1.2793e-09	0.310853	0.78	0.63	2.31285e-05	2_injured_3day_vs_2_injured_9day		Endoneurial fibroblasts
Limd12	1.32675e-09	0.464028	0.466	0.254	2.39863e-05	2_injured_3day_vs_2_injured_9day		Endoneurial fibroblasts
Thsd42	1.34016e-09	0.321201	0.346	0.152	2.42288e-05	2_injured_3day_vs_2_injured_9day		Endoneurial fibroblasts
Cxxc53	1.42536e-09	0.481211	0.417	0.208	2.57691e-05	2_injured_3day_vs_2_injured_9day		Endoneurial fibroblasts
Eef25	1.45331e-09	0.520821	0.767	0.627	2.62744e-05	2_injured_3day_vs_2_injured_9day		Endoneurial fibroblasts
Cltc3	1.46537e-09	0.413236	0.553	0.337	2.64925e-05	2_injured_3day_vs_2_injured_9day		Endoneurial fibroblasts
Col26a12	1.5209e-09	-0.94572	0.524	0.661	2.74964e-05	2_injured_3day_vs_2_injured_9day		Endoneurial fibroblasts
Ndufc15	1.60656e-09	0.56263	0.566	0.373	2.9045e-05	2_injured_3day_vs_2_injured_9day		Endoneurial fibroblasts
Ssb3	1.64038e-09	0.546064	0.657	0.499	2.96565e-05	2_injured_3day_vs_2_injured_9day		Endoneurial fibroblasts
Acly1	1.6891e-09	0.473317	0.314	0.123	3.05372e-05	2_injured_3day_vs_2_injured_9day		Endoneurial fibroblasts
Fos7	1.70692e-09	-0.638807	0.809	0.838	3.08594e-05	2_injured_3day_vs_2_injured_9day		Endoneurial fibroblasts
2410131K14Rik	1.71206e-09	0.308771	0.162	0.031	3.09524e-05	2_injured_3day_vs_2_injured_9day		Endoneurial fibroblasts
Gnb2l16	1.74089e-09	0.411443	0.871	0.748	3.14736e-05	2_injured_3day_vs_2_injured_9day		Endoneurial fibroblasts
Gm100934	1.74631e-09	0.33153	0.278	0.103	3.15715e-05	2_injured_3day_vs_2_injured_9day		Endoneurial fibroblasts
Bmp71	1.82324e-09	0.548057	0.388	0.19	3.29623e-05	2_injured_3day_vs_2_injured_9day		Endoneurial fibroblasts
RP23-103I12.135	1.84445e-09	0.595998	0.706	0.542	3.33458e-05	2_injured_3day_vs_2_injured_9day		Endoneurial fibroblasts
Rpl36al3	1.92698e-09	0.428417	0.608	0.442	3.48379e-05	2_injured_3day_vs_2_injured_9day		Endoneurial fibroblasts
Deb13	1.97513e-09	0.293735	0.353	0.152	3.57083e-05	2_injured_3day_vs_2_injured_9day		Endoneurial fibroblasts
Tpm34	2.00085e-09	0.553216	0.641	0.465	3.61734e-05	2_injured_3day_vs_2_injured_9day		Endoneurial fibroblasts
Plac84	2.09708e-09	-1.35483	0.168	0.339	3.79131e-05	2_injured_3day_vs_2_injured_9day		Endoneurial fibroblasts
Gm52395	2.10059e-09	0.303059	0.155	0.028	3.79765e-05	2_injured_3day_vs_2_injured_9day		Endoneurial fibroblasts
Ndufb31	2.30677e-09	0.559554	0.498	0.29	4.1704e-05	2_injured_3day_vs_2_injured_9day		Endoneurial fibroblasts
Flnc3	2.40088e-09	0.442772	0.34	0.149	4.34055e-05	2_injured_3day_vs_2_injured_9day		Endoneurial fibroblasts
Gm49452	2.40267e-09	0.316538	0.133	0.018	4.34378e-05	2_injured_3day_vs_2_injured_9day		Endoneurial fibroblasts
Aldh1a21	2.49504e-09	-0.797239	0.042	0.19	4.51078e-05	2_injured_3day_vs_2_injured_9day		Endoneurial fibroblasts
Tshz32	2.55108e-09	0.553356	0.518	0.296	4.61209e-05	2_injured_3day_vs_2_injured_9day		Endoneurial fibroblasts
Myeov24	2.69734e-09	0.409191	0.647	0.437	4.87652e-05	2_injured_3day_vs_2_injured_9day		Endoneurial fibroblasts
Fxyd53	2.76476e-09	0.443293	0.414	0.216	4.9984e-05	2_injured_3day_vs_2_injured_9day		Endoneurial fibroblasts
Shfm15	2.82223e-09	0.522789	0.741	0.586	5.10231e-05	2_injured_3day_vs_2_injured_9day		Endoneurial fibroblasts
Gstp17	2.87279e-09	0.541393	0.479	0.283	5.19372e-05	2_injured_3day_vs_2_injured_9day		Endoneurial fibroblasts
Il1r17	2.89084e-09	-0.884184	0.23	0.411	5.22635e-05	2_injured_3day_vs_2_injured_9day		Endoneurial fibroblasts
Gm165193	3.12138e-09	0.562643	0.126	0.015	5.64314e-05	2_injured_3day_vs_2_injured_9day		Endoneurial fibroblasts
Phldb13	3.16392e-09	0.572653	0.447	0.244	5.72004e-05	2_injured_3day_vs_2_injured_9day		Endoneurial fibroblasts
Epb4.1l11	3.34348e-09	0.468869	0.379	0.183	6.04467e-05	2_injured_3day_vs_2_injured_9day		Endoneurial fibroblasts
Ogdh3	3.60991e-09	0.487838	0.317	0.134	6.52636e-05	2_injured_3day_vs_2_injured_9day		Endoneurial fibroblasts
Uba524	3.66747e-09	0.51358	0.356	0.17	6.63041e-05	2_injured_3day_vs_2_injured_9day		Endoneurial fibroblasts
Ccnd32	3.6732e-09	0.384828	0.356	0.165	6.64078e-05	2_injured_3day_vs_2_injured_9day		Endoneurial fibroblasts
Pdlim43	4.2936e-09	0.461453	0.502	0.301	7.7624e-05	2_injured_3day_vs_2_injured_9day		Endoneurial fibroblasts
Calm16	4.4578e-09	0.461794	0.851	0.769	8.05926e-05	2_injured_3day_vs_2_injured_9day		Endoneurial fibroblasts
Ptms5	4.54848e-09	0.433691	0.767	0.635	8.22319e-05	2_injured_3day_vs_2_injured_9day		Endoneurial fibroblasts
Sgk14	4.55105e-09	0.618645	0.602	0.411	8.22784e-05	2_injured_3day_vs_2_injured_9day		Endoneurial fibroblasts
Ptma6	4.93295e-09	0.521045	0.524	0.342	8.91828e-05	2_injured_3day_vs_2_injured_9day		Endoneurial fibroblasts
Lamtor23	5.03395e-09	0.62563	0.547	0.329	9.10089e-05	2_injured_3day_vs_2_injured_9day		Endoneurial fibroblasts
Pvrl21	5.05074e-09	0.520772	0.288	0.111	9.13124e-05	2_injured_3day_vs_2_injured_9day		Endoneurial fibroblasts
Romo15	5.17506e-09	0.493658	0.557	0.368	9.35599e-05	2_injured_3day_vs_2_injured_9day		Endoneurial fibroblasts
Dync1i22	5.60014e-09	0.450868	0.65	0.463	0.000101245	2_injured_3day_vs_2_injured_9day		Endoneurial fibroblasts
Sox82	5.91317e-09	0.629692	0.259	0.095	0.000106904	2_injured_3day_vs_2_injured_9day		Endoneurial fibroblasts
Pdia67	6.44646e-09	0.471247	0.79	0.668	0.000116546	2_injured_3day_vs_2_injured_9day		Endoneurial fibroblasts
Rplp06	6.59356e-09	0.448607	0.828	0.73	0.000119205	2_injured_3day_vs_2_injured_9day		Endoneurial fibroblasts
Ebf14	6.659e-09	0.467113	0.576	0.386	0.000120388	2_injured_3day_vs_2_injured_9day		Endoneurial fibroblasts
Igsf102	6.9947e-09	-0.767631	0.142	0.321	0.000126457	2_injured_3day_vs_2_injured_9day		Endoneurial fibroblasts
Eef1a13	7.05073e-09	0.467234	0.806	0.674	0.00012747	2_injured_3day_vs_2_injured_9day		Endoneurial fibroblasts
B2m2	7.05192e-09	-0.727198	0.816	0.787	0.000127492	2_injured_3day_vs_2_injured_9day		Endoneurial fibroblasts
Snrpf2	7.05309e-09	0.582765	0.482	0.288	0.000127513	2_injured_3day_vs_2_injured_9day		Endoneurial fibroblasts
Krtcap23	7.06172e-09	0.496935	0.689	0.532	0.000127669	2_injured_3day_vs_2_injured_9day		Endoneurial fibroblasts
Pebp13	7.39363e-09	0.506595	0.57	0.37	0.000133669	2_injured_3day_vs_2_injured_9day		Endoneurial fibroblasts
Ahnak5	7.62473e-09	0.508996	0.77	0.627	0.000137848	2_injured_3day_vs_2_injured_9day		Endoneurial fibroblasts
Tma73	7.6565e-09	0.363134	0.291	0.116	0.000138422	2_injured_3day_vs_2_injured_9day		Endoneurial fibroblasts
Gm84206	8.18184e-09	0.604215	0.385	0.193	0.000147919	2_injured_3day_vs_2_injured_9day		Endoneurial fibroblasts
Uqcrb5	8.26464e-09	0.614474	0.531	0.347	0.000149416	2_injured_3day_vs_2_injured_9day		Endoneurial fibroblasts
Gm75894	8.2734e-09	0.580306	0.246	0.087	0.000149575	2_injured_3day_vs_2_injured_9day		Endoneurial fibroblasts
Gm50936	8.64307e-09	0.541363	0.256	0.093	0.000156258	2_injured_3day_vs_2_injured_9day		Endoneurial fibroblasts
Gm47753	8.69069e-09	0.263805	0.133	0.021	0.000157119	2_injured_3day_vs_2_injured_9day		Endoneurial fibroblasts
1996-09-01	9.24679e-09	0.436881	0.628	0.442	0.000167173	2_injured_3day_vs_2_injured_9day		Endoneurial fibroblasts
Tbca4	1.01729e-08	0.531886	0.579	0.383	0.000183916	2_injured_3day_vs_2_injured_9day		Endoneurial fibroblasts
Colgalt14	1.03179e-08	0.50721	0.495	0.293	0.000186537	2_injured_3day_vs_2_injured_9day		Endoneurial fibroblasts
Cox7c5	1.04426e-08	0.681168	0.382	0.19	0.000188792	2_injured_3day_vs_2_injured_9day		Endoneurial fibroblasts
Gpr1242	1.07173e-08	0.34478	0.327	0.147	0.000193758	2_injured_3day_vs_2_injured_9day		Endoneurial fibroblasts
Fkbp1a5	1.09057e-08	0.463773	0.625	0.45	0.000197164	2_injured_3day_vs_2_injured_9day		Endoneurial fibroblasts
Atp5b3	1.1062e-08	0.466679	0.699	0.542	0.00019999	2_injured_3day_vs_2_injured_9day		Endoneurial fibroblasts
Rps133	1.12171e-08	0.320192	0.291	0.121	0.000202794	2_injured_3day_vs_2_injured_9day		Endoneurial fibroblasts
Ank5	1.1473e-08	0.534853	0.592	0.419	0.00020742	2_injured_3day_vs_2_injured_9day		Endoneurial fibroblasts
Mtch16	1.24035e-08	0.531049	0.579	0.406	0.000224243	2_injured_3day_vs_2_injured_9day		Endoneurial fibroblasts
Atp5g15	1.29009e-08	0.422841	0.301	0.126	0.000233235	2_injured_3day_vs_2_injured_9day		Endoneurial fibroblasts
Pabpc44	1.34391e-08	0.395876	0.298	0.129	0.000242965	2_injured_3day_vs_2_injured_9day		Endoneurial fibroblasts
Naca5	1.38403e-08	0.461502	0.615	0.445	0.000250219	2_injured_3day_vs_2_injured_9day		Endoneurial fibroblasts
0610007N19Rik2	1.39315e-08	0.677272	0.599	0.404	0.000251868	2_injured_3day_vs_2_injured_9day		Endoneurial fibroblasts
Gm241211	1.46148e-08	0.289254	0.126	0.018	0.00026422	2_injured_3day_vs_2_injured_9day		Endoneurial fibroblasts
Nsa25	1.46309e-08	0.399074	0.207	0.064	0.000264511	2_injured_3day_vs_2_injured_9day		Endoneurial fibroblasts
Ccnd28	1.49325e-08	0.428604	0.647	0.476	0.000269964	2_injured_3day_vs_2_injured_9day		Endoneurial fibroblasts
Tpcn1	1.51639e-08	0.31797	0.246	0.087	0.000274149	2_injured_3day_vs_2_injured_9day		Endoneurial fibroblasts
Prkcdbp3	1.53371e-08	0.687826	0.595	0.427	0.00027728	2_injured_3day_vs_2_injured_9day		Endoneurial fibroblasts
Rpl196	1.53441e-08	0.557844	0.443	0.272	0.000277406	2_injured_3day_vs_2_injured_9day		Endoneurial fibroblasts
Pltp6	1.53506e-08	-0.81023	0.469	0.602	0.000277524	2_injured_3day_vs_2_injured_9day		Endoneurial fibroblasts
Clic15	1.54258e-08	0.361	0.67	0.488	0.000278884	2_injured_3day_vs_2_injured_9day		Endoneurial fibroblasts
Cxx1b2	1.62228e-08	0.661675	0.608	0.434	0.000293293	2_injured_3day_vs_2_injured_9day		Endoneurial fibroblasts
Pcbp41	1.72796e-08	0.319535	0.333	0.152	0.000312397	2_injured_3day_vs_2_injured_9day		Endoneurial fibroblasts
Rexo24	1.73532e-08	0.616786	0.615	0.427	0.000313729	2_injured_3day_vs_2_injured_9day		Endoneurial fibroblasts
Gnb14	1.74576e-08	0.379317	0.592	0.409	0.000315617	2_injured_3day_vs_2_injured_9day		Endoneurial fibroblasts
Eid2	1.96318e-08	0.375776	0.149	0.031	0.000354923	2_injured_3day_vs_2_injured_9day		Endoneurial fibroblasts
Cdkn2a1	1.99144e-08	0.568528	0.583	0.391	0.000360033	2_injured_3day_vs_2_injured_9day		Endoneurial fibroblasts
Tmed94	2.03626e-08	0.459312	0.673	0.527	0.000368136	2_injured_3day_vs_2_injured_9day		Endoneurial fibroblasts
H2afj4	2.21995e-08	0.549788	0.618	0.458	0.000401344	2_injured_3day_vs_2_injured_9day		Endoneurial fibroblasts
Hnrnpa04	2.23265e-08	0.390587	0.547	0.362	0.000403641	2_injured_3day_vs_2_injured_9day		Endoneurial fibroblasts
Timm10b3	2.27806e-08	0.597867	0.485	0.296	0.000411851	2_injured_3day_vs_2_injured_9day		Endoneurial fibroblasts
Gga2	2.40981e-08	0.411385	0.217	0.072	0.00043567	2_injured_3day_vs_2_injured_9day		Endoneurial fibroblasts
Malat16	2.43094e-08	-0.674695	0.913	0.972	0.00043949	2_injured_3day_vs_2_injured_9day		Endoneurial fibroblasts
Pxn2	2.4712e-08	0.314671	0.375	0.185	0.000446769	2_injured_3day_vs_2_injured_9day		Endoneurial fibroblasts
Cox204	2.56388e-08	0.724461	0.417	0.234	0.000463523	2_injured_3day_vs_2_injured_9day		Endoneurial fibroblasts
Idh23	2.58326e-08	0.494741	0.369	0.185	0.000467028	2_injured_3day_vs_2_injured_9day		Endoneurial fibroblasts
Fetub2	2.60918e-08	0.697596	0.408	0.219	0.000471713	2_injured_3day_vs_2_injured_9day		Endoneurial fibroblasts
Tmed25	2.75876e-08	0.559854	0.502	0.319	0.000498757	2_injured_3day_vs_2_injured_9day		Endoneurial fibroblasts
Ly6c16	2.81547e-08	0.540254	0.35	0.165	0.000509009	2_injured_3day_vs_2_injured_9day		Endoneurial fibroblasts
Degs13	2.84836e-08	0.5499	0.55	0.375	0.000514956	2_injured_3day_vs_2_injured_9day		Endoneurial fibroblasts
Eno15	2.90611e-08	0.468987	0.35	0.17	0.000525395	2_injured_3day_vs_2_injured_9day		Endoneurial fibroblasts
Pkdcc4	2.92495e-08	0.541584	0.518	0.355	0.000528802	2_injured_3day_vs_2_injured_9day		Endoneurial fibroblasts
Map4k41	2.95922e-08	0.490791	0.589	0.404	0.000534997	2_injured_3day_vs_2_injured_9day		Endoneurial fibroblasts
Tpt15	3.03545e-08	0.374623	0.579	0.432	0.000548778	2_injured_3day_vs_2_injured_9day		Endoneurial fibroblasts
Crispld16	3.28129e-08	0.491181	0.498	0.303	0.000593224	2_injured_3day_vs_2_injured_9day		Endoneurial fibroblasts
Olfm13	3.32278e-08	0.380178	0.411	0.224	0.000600725	2_injured_3day_vs_2_injured_9day		Endoneurial fibroblasts
Gars	3.39759e-08	0.399032	0.324	0.152	0.00061425	2_injured_3day_vs_2_injured_9day		Endoneurial fibroblasts
Fam213a1	3.61805e-08	0.443675	0.32	0.152	0.000654107	2_injured_3day_vs_2_injured_9day		Endoneurial fibroblasts
Copa5	3.62315e-08	0.443437	0.521	0.339	0.00065503	2_injured_3day_vs_2_injured_9day		Endoneurial fibroblasts
Eif4a12	3.68973e-08	0.616751	0.476	0.298	0.000667067	2_injured_3day_vs_2_injured_9day		Endoneurial fibroblasts
Ccar15	3.85407e-08	0.490802	0.573	0.378	0.000696777	2_injured_3day_vs_2_injured_9day		Endoneurial fibroblasts
AI8371811	3.88856e-08	0.266432	0.21	0.069	0.000703013	2_injured_3day_vs_2_injured_9day		Endoneurial fibroblasts
Cxx1a3	4.25642e-08	0.790173	0.388	0.221	0.000769517	2_injured_3day_vs_2_injured_9day		Endoneurial fibroblasts
Cox6b13	4.39794e-08	0.402108	0.715	0.568	0.000795104	2_injured_3day_vs_2_injured_9day		Endoneurial fibroblasts
Rpn21	4.53415e-08	0.302645	0.641	0.476	0.000819729	2_injured_3day_vs_2_injured_9day		Endoneurial fibroblasts
Gatad11	4.71706e-08	0.414483	0.356	0.172	0.000852796	2_injured_3day_vs_2_injured_9day		Endoneurial fibroblasts
Rps27a4	4.73275e-08	0.308733	0.262	0.105	0.000855633	2_injured_3day_vs_2_injured_9day		Endoneurial fibroblasts
Birc55	5.05252e-08	0.625473	0.133	0.026	0.000913445	2_injured_3day_vs_2_injured_9day		Endoneurial fibroblasts
Acot72	5.17087e-08	0.481368	0.239	0.09	0.000934841	2_injured_3day_vs_2_injured_9day		Endoneurial fibroblasts
Abcf11	5.96064e-08	0.348988	0.479	0.28	0.00107762	2_injured_3day_vs_2_injured_9day		Endoneurial fibroblasts
Knop15	6.07969e-08	0.372097	0.382	0.193	0.00109915	2_injured_3day_vs_2_injured_9day		Endoneurial fibroblasts
Ncl6	6.11722e-08	0.650878	0.722	0.594	0.00110593	2_injured_3day_vs_2_injured_9day		Endoneurial fibroblasts
Rpl7a-ps83	6.12018e-08	0.327584	0.107	0.013	0.00110647	2_injured_3day_vs_2_injured_9day		Endoneurial fibroblasts
Gpx76	6.40811e-08	0.52727	0.634	0.452	0.00115852	2_injured_3day_vs_2_injured_9day		Endoneurial fibroblasts
Ppp1r14b3	6.64178e-08	0.504775	0.359	0.185	0.00120077	2_injured_3day_vs_2_injured_9day		Endoneurial fibroblasts
Tmem431	6.77454e-08	0.490683	0.33	0.159	0.00122477	2_injured_3day_vs_2_injured_9day		Endoneurial fibroblasts
C1rb4	6.82466e-08	-0.92309	0.133	0.288	0.00123383	2_injured_3day_vs_2_injured_9day		Endoneurial fibroblasts
Prelid16	6.87767e-08	0.289143	0.472	0.303	0.00124341	2_injured_3day_vs_2_injured_9day		Endoneurial fibroblasts
Ywhae4	7.00958e-08	0.517914	0.718	0.573	0.00126726	2_injured_3day_vs_2_injured_9day		Endoneurial fibroblasts
Tnfaip33	7.37078e-08	-0.679321	0.065	0.203	0.00133256	2_injured_3day_vs_2_injured_9day		Endoneurial fibroblasts
Atp5a13	7.51153e-08	0.415558	0.667	0.522	0.00135801	2_injured_3day_vs_2_injured_9day		Endoneurial fibroblasts
Loxl27	7.62918e-08	0.395801	0.764	0.653	0.00137928	2_injured_3day_vs_2_injured_9day		Endoneurial fibroblasts
Abca16	8.14721e-08	-0.78338	0.304	0.455	0.00147293	2_injured_3day_vs_2_injured_9day		Endoneurial fibroblasts
RP24-176F12.144	8.37863e-08	0.293604	0.272	0.111	0.00151477	2_injured_3day_vs_2_injured_9day		Endoneurial fibroblasts
Psmc33	8.93128e-08	0.506648	0.544	0.373	0.00161469	2_injured_3day_vs_2_injured_9day		Endoneurial fibroblasts
Marveld14	8.93848e-08	0.286072	0.256	0.1	0.00161599	2_injured_3day_vs_2_injured_9day		Endoneurial fibroblasts
Junb7	8.94289e-08	-0.702498	0.663	0.738	0.00161679	2_injured_3day_vs_2_injured_9day		Endoneurial fibroblasts
Hist1h2al5	9.05408e-08	0.456051	0.188	0.057	0.00163689	2_injured_3day_vs_2_injured_9day		Endoneurial fibroblasts
Tgm25	9.38441e-08	0.434677	0.612	0.452	0.00169661	2_injured_3day_vs_2_injured_9day		Endoneurial fibroblasts
Cadm41	9.4918e-08	0.406442	0.282	0.123	0.00171602	2_injured_3day_vs_2_injured_9day		Endoneurial fibroblasts
Psmd24	9.8922e-08	0.514582	0.515	0.316	0.00178841	2_injured_3day_vs_2_injured_9day		Endoneurial fibroblasts
Tmem176b3	9.89552e-08	-0.691344	0.417	0.555	0.00178901	2_injured_3day_vs_2_injured_9day		Endoneurial fibroblasts
Slc25a43	1.00114e-07	0.342536	0.799	0.671	0.00180996	2_injured_3day_vs_2_injured_9day		Endoneurial fibroblasts
Ngfr4	1.05834e-07	0.26061	0.21	0.072	0.00191337	2_injured_3day_vs_2_injured_9day		Endoneurial fibroblasts
Psmc15	1.05949e-07	0.395816	0.515	0.332	0.00191545	2_injured_3day_vs_2_injured_9day		Endoneurial fibroblasts
Sipa1l11	1.07784e-07	0.551415	0.294	0.131	0.00194862	2_injured_3day_vs_2_injured_9day		Endoneurial fibroblasts
Sar1a4	1.15298e-07	0.457496	0.693	0.53	0.00208447	2_injured_3day_vs_2_injured_9day		Endoneurial fibroblasts
Stra61	1.16754e-07	0.274816	0.181	0.054	0.0021108	2_injured_3day_vs_2_injured_9day		Endoneurial fibroblasts
Leprel42	1.17374e-07	0.445981	0.327	0.154	0.002122	2_injured_3day_vs_2_injured_9day		Endoneurial fibroblasts
Gpi14	1.17511e-07	0.410321	0.482	0.283	0.00212448	2_injured_3day_vs_2_injured_9day		Endoneurial fibroblasts
Mpi1	1.21041e-07	0.358199	0.204	0.069	0.0021883	2_injured_3day_vs_2_injured_9day		Endoneurial fibroblasts
Ubl41	1.2331e-07	0.541845	0.314	0.149	0.00222932	2_injured_3day_vs_2_injured_9day		Endoneurial fibroblasts
Sec61g3	1.2437e-07	0.576994	0.236	0.095	0.00224849	2_injured_3day_vs_2_injured_9day		Endoneurial fibroblasts
Ctla2a5	1.29182e-07	0.38017	0.288	0.118	0.00233548	2_injured_3day_vs_2_injured_9day		Endoneurial fibroblasts
Rwdd14	1.34005e-07	0.611688	0.405	0.231	0.00242268	2_injured_3day_vs_2_injured_9day		Endoneurial fibroblasts
Dnajc33	1.37831e-07	-0.754446	0.43	0.558	0.00249184	2_injured_3day_vs_2_injured_9day		Endoneurial fibroblasts
Fkbp103	1.54071e-07	0.492001	0.485	0.303	0.00278544	2_injured_3day_vs_2_injured_9day		Endoneurial fibroblasts
Dmd1	1.55866e-07	-0.627698	0.087	0.234	0.0028179	2_injured_3day_vs_2_injured_9day		Endoneurial fibroblasts
Cox4i16	1.63031e-07	0.324247	0.822	0.722	0.00294743	2_injured_3day_vs_2_injured_9day		Endoneurial fibroblasts
Crlf12	1.64918e-07	0.360158	0.327	0.162	0.00298155	2_injured_3day_vs_2_injured_9day		Endoneurial fibroblasts
Cd3025	1.65272e-07	-0.779317	0.608	0.658	0.00298796	2_injured_3day_vs_2_injured_9day		Endoneurial fibroblasts
Lsm72	1.66609e-07	0.498771	0.178	0.054	0.00301213	2_injured_3day_vs_2_injured_9day		Endoneurial fibroblasts
Bola31	1.7827e-07	0.334272	0.317	0.152	0.00322294	2_injured_3day_vs_2_injured_9day		Endoneurial fibroblasts
Ndufa133	1.81341e-07	0.376152	0.696	0.555	0.00327846	2_injured_3day_vs_2_injured_9day		Endoneurial fibroblasts
Entpd25	1.81597e-07	-0.739096	0.595	0.674	0.0032831	2_injured_3day_vs_2_injured_9day		Endoneurial fibroblasts
Col6a37	1.86549e-07	0.339572	0.79	0.663	0.00337262	2_injured_3day_vs_2_injured_9day		Endoneurial fibroblasts
Llph1	1.8661e-07	0.261089	0.246	0.095	0.00337372	2_injured_3day_vs_2_injured_9day		Endoneurial fibroblasts
Cltb5	1.90011e-07	0.462286	0.54	0.365	0.00343521	2_injured_3day_vs_2_injured_9day		Endoneurial fibroblasts
Vit4	1.91236e-07	0.327336	0.278	0.123	0.00345735	2_injured_3day_vs_2_injured_9day		Endoneurial fibroblasts
Gpc14	1.9779e-07	0.490426	0.272	0.121	0.00357585	2_injured_3day_vs_2_injured_9day		Endoneurial fibroblasts
Ifitm24	1.9789e-07	-0.698612	0.757	0.733	0.00357765	2_injured_3day_vs_2_injured_9day		Endoneurial fibroblasts
Fgfr14	2.10043e-07	0.354577	0.547	0.383	0.00379737	2_injured_3day_vs_2_injured_9day		Endoneurial fibroblasts
Cox7a23	2.10335e-07	0.385466	0.68	0.53	0.00380265	2_injured_3day_vs_2_injured_9day		Endoneurial fibroblasts
Vps81	2.1173e-07	0.281252	0.117	0.021	0.00382787	2_injured_3day_vs_2_injured_9day		Endoneurial fibroblasts
Rpl23a3	2.17488e-07	0.304119	0.227	0.087	0.00393197	2_injured_3day_vs_2_injured_9day		Endoneurial fibroblasts
Uaca5	2.2764e-07	0.675239	0.476	0.308	0.00411551	2_injured_3day_vs_2_injured_9day		Endoneurial fibroblasts
Magt12	2.30739e-07	0.282427	0.553	0.355	0.00417154	2_injured_3day_vs_2_injured_9day		Endoneurial fibroblasts
Ptp4a26	2.30757e-07	0.483429	0.68	0.517	0.00417185	2_injured_3day_vs_2_injured_9day		Endoneurial fibroblasts
Neat16	2.34164e-07	0.371964	0.489	0.29	0.00423345	2_injured_3day_vs_2_injured_9day		Endoneurial fibroblasts
Cox6a13	2.43933e-07	0.424373	0.748	0.62	0.00441006	2_injured_3day_vs_2_injured_9day		Endoneurial fibroblasts
Plat4	2.43962e-07	0.327069	0.722	0.573	0.0044106	2_injured_3day_vs_2_injured_9day		Endoneurial fibroblasts
Cav16	2.50054e-07	0.611161	0.534	0.362	0.00452072	2_injured_3day_vs_2_injured_9day		Endoneurial fibroblasts
Lamp24	2.50277e-07	-0.799133	0.647	0.686	0.00452476	2_injured_3day_vs_2_injured_9day		Endoneurial fibroblasts
Rac13	2.67097e-07	0.421221	0.638	0.473	0.00482885	2_injured_3day_vs_2_injured_9day		Endoneurial fibroblasts
Ndufs55	2.69044e-07	0.360125	0.236	0.095	0.00486404	2_injured_3day_vs_2_injured_9day		Endoneurial fibroblasts
Ddost5	2.74381e-07	0.482716	0.663	0.509	0.00496054	2_injured_3day_vs_2_injured_9day		Endoneurial fibroblasts
Klf64	2.74849e-07	0.489158	0.715	0.584	0.00496899	2_injured_3day_vs_2_injured_9day		Endoneurial fibroblasts
Larp73	2.81442e-07	0.362997	0.314	0.144	0.00508818	2_injured_3day_vs_2_injured_9day		Endoneurial fibroblasts
Cotl14	2.82739e-07	0.394338	0.369	0.195	0.00511163	2_injured_3day_vs_2_injured_9day		Endoneurial fibroblasts
Tmed34	3.0616e-07	0.503597	0.725	0.548	0.00553506	2_injured_3day_vs_2_injured_9day		Endoneurial fibroblasts
Rpl76	3.15428e-07	0.428488	0.599	0.445	0.00570263	2_injured_3day_vs_2_injured_9day		Endoneurial fibroblasts
Cygb4	3.23837e-07	-0.81038	0.537	0.63	0.00585466	2_injured_3day_vs_2_injured_9day		Endoneurial fibroblasts
Tuba1a6	3.38186e-07	0.438802	0.738	0.617	0.00611406	2_injured_3day_vs_2_injured_9day		Endoneurial fibroblasts
Gm263353	3.41206e-07	0.465585	0.165	0.049	0.00616866	2_injured_3day_vs_2_injured_9day		Endoneurial fibroblasts
Hmgn14	3.43752e-07	0.428881	0.65	0.512	0.0062147	2_injured_3day_vs_2_injured_9day		Endoneurial fibroblasts
Ndufa34	3.49324e-07	0.319303	0.628	0.481	0.00631542	2_injured_3day_vs_2_injured_9day		Endoneurial fibroblasts
Gm76765	3.54471e-07	0.493402	0.252	0.108	0.00640848	2_injured_3day_vs_2_injured_9day		Endoneurial fibroblasts
Nars3	3.55235e-07	0.652204	0.495	0.319	0.0064223	2_injured_3day_vs_2_injured_9day		Endoneurial fibroblasts
Furin4	3.61581e-07	0.374363	0.35	0.188	0.00653702	2_injured_3day_vs_2_injured_9day		Endoneurial fibroblasts
Gm21782	3.63747e-07	0.323655	0.104	0.015	0.00657618	2_injured_3day_vs_2_injured_9day		Endoneurial fibroblasts
Snhg34	3.75898e-07	0.408483	0.272	0.118	0.00679587	2_injured_3day_vs_2_injured_9day		Endoneurial fibroblasts
Anxa63	3.76407e-07	0.483863	0.375	0.201	0.00680506	2_injured_3day_vs_2_injured_9day		Endoneurial fibroblasts
Rps27l5	3.8086e-07	0.423094	0.683	0.524	0.00688558	2_injured_3day_vs_2_injured_9day		Endoneurial fibroblasts
Ntn13	3.96888e-07	0.283132	0.32	0.154	0.00717534	2_injured_3day_vs_2_injured_9day		Endoneurial fibroblasts
Ramp11	4.11098e-07	-0.911311	0.259	0.427	0.00743223	2_injured_3day_vs_2_injured_9day		Endoneurial fibroblasts
H133	4.4642e-07	0.410403	0.508	0.332	0.00807082	2_injured_3day_vs_2_injured_9day		Endoneurial fibroblasts
Gm100943	4.48657e-07	0.424141	0.21	0.077	0.00811127	2_injured_3day_vs_2_injured_9day		Endoneurial fibroblasts
Tnfrsf231	4.48955e-07	0.276232	0.165	0.049	0.00811665	2_injured_3day_vs_2_injured_9day		Endoneurial fibroblasts
Hdac14	4.53851e-07	0.481303	0.369	0.203	0.00820518	2_injured_3day_vs_2_injured_9day		Endoneurial fibroblasts
Gm24272	4.54172e-07	0.324092	0.107	0.018	0.00821097	2_injured_3day_vs_2_injured_9day		Endoneurial fibroblasts
Metap24	4.56515e-07	0.359371	0.544	0.391	0.00825333	2_injured_3day_vs_2_injured_9day		Endoneurial fibroblasts
Gm100202	4.63559e-07	0.316498	0.133	0.031	0.00838068	2_injured_3day_vs_2_injured_9day		Endoneurial fibroblasts
Ptges2	4.6678e-07	0.524361	0.405	0.237	0.00843892	2_injured_3day_vs_2_injured_9day		Endoneurial fibroblasts
Cox8a2	5.47897e-07	0.570246	0.657	0.537	0.00990542	2_injured_3day_vs_2_injured_9day		Endoneurial fibroblasts
Ndufb23	5.53297e-07	0.342599	0.511	0.337	0.0100031	2_injured_3day_vs_2_injured_9day		Endoneurial fibroblasts
Ifi304	5.59268e-07	0.470988	0.239	0.1	0.010111	2_injured_3day_vs_2_injured_9day		Endoneurial fibroblasts
Mdh23	5.69803e-07	0.413444	0.515	0.355	0.0103015	2_injured_3day_vs_2_injured_9day		Endoneurial fibroblasts
Prdx26	6.12922e-07	0.479668	0.67	0.512	0.011081	2_injured_3day_vs_2_injured_9day		Endoneurial fibroblasts
Dcbld23	6.13226e-07	0.334079	0.634	0.463	0.0110865	2_injured_3day_vs_2_injured_9day		Endoneurial fibroblasts
Fam162a3	6.36969e-07	0.520212	0.44	0.275	0.0115158	2_injured_3day_vs_2_injured_9day		Endoneurial fibroblasts
Col1a13	6.81013e-07	0.343995	0.958	0.946	0.012312	2_injured_3day_vs_2_injured_9day		Endoneurial fibroblasts
Car44	6.86623e-07	0.429802	0.239	0.103	0.0124135	2_injured_3day_vs_2_injured_9day		Endoneurial fibroblasts
Cox5a5	7.54315e-07	0.372314	0.54	0.375	0.0136373	2_injured_3day_vs_2_injured_9day		Endoneurial fibroblasts
Mcfd23	7.61019e-07	0.348197	0.44	0.27	0.0137585	2_injured_3day_vs_2_injured_9day		Endoneurial fibroblasts
Praf22	7.64421e-07	0.656323	0.288	0.144	0.01382	2_injured_3day_vs_2_injured_9day		Endoneurial fibroblasts
Slc25a56	7.94216e-07	0.544496	0.592	0.46	0.0143586	2_injured_3day_vs_2_injured_9day		Endoneurial fibroblasts
Pdcd55	8.08914e-07	0.559991	0.333	0.177	0.0146244	2_injured_3day_vs_2_injured_9day		Endoneurial fibroblasts
Vkorc13	8.53024e-07	0.284163	0.686	0.517	0.0154218	2_injured_3day_vs_2_injured_9day		Endoneurial fibroblasts
Ppig6	8.90262e-07	0.328676	0.563	0.393	0.016095	2_injured_3day_vs_2_injured_9day		Endoneurial fibroblasts
Ier37	9.15554e-07	-1.11014	0.421	0.522	0.0165523	2_injured_3day_vs_2_injured_9day		Endoneurial fibroblasts
Ran4	9.38132e-07	0.436894	0.476	0.319	0.0169605	2_injured_3day_vs_2_injured_9day		Endoneurial fibroblasts
Top15	9.98003e-07	0.356628	0.641	0.47	0.0180429	2_injured_3day_vs_2_injured_9day		Endoneurial fibroblasts
Itm2b6	1.01946e-06	-0.478268	0.793	0.748	0.0184308	2_injured_3day_vs_2_injured_9day		Endoneurial fibroblasts
Anxa34	1.04533e-06	0.265841	0.317	0.157	0.0188985	2_injured_3day_vs_2_injured_9day		Endoneurial fibroblasts
Olfml11	1.079e-06	-0.506313	0.039	0.152	0.0195073	2_injured_3day_vs_2_injured_9day		Endoneurial fibroblasts
Myh94	1.10209e-06	0.515333	0.492	0.316	0.0199248	2_injured_3day_vs_2_injured_9day		Endoneurial fibroblasts
Rpl66	1.11611e-06	0.461309	0.663	0.499	0.0201782	2_injured_3day_vs_2_injured_9day		Endoneurial fibroblasts
Myo63	1.14105e-06	0.395096	0.324	0.165	0.020629	2_injured_3day_vs_2_injured_9day		Endoneurial fibroblasts
Runx15	1.16124e-06	-0.687427	0.233	0.386	0.0209941	2_injured_3day_vs_2_injured_9day		Endoneurial fibroblasts
Ptov1	1.17046e-06	0.274109	0.54	0.347	0.0211607	2_injured_3day_vs_2_injured_9day		Endoneurial fibroblasts
Zcchc171	1.20059e-06	0.458824	0.353	0.195	0.0217055	2_injured_3day_vs_2_injured_9day		Endoneurial fibroblasts
Cfdp14	1.20387e-06	0.523907	0.553	0.422	0.0217648	2_injured_3day_vs_2_injured_9day		Endoneurial fibroblasts
Gsn8	1.20773e-06	0.373749	0.877	0.758	0.0218346	2_injured_3day_vs_2_injured_9day		Endoneurial fibroblasts
Glg11	1.2694e-06	0.456291	0.502	0.337	0.0229496	2_injured_3day_vs_2_injured_9day		Endoneurial fibroblasts
Sepw12	1.27391e-06	0.393665	0.686	0.55	0.0230311	2_injured_3day_vs_2_injured_9day		Endoneurial fibroblasts
Capg6	1.28928e-06	0.363298	0.476	0.329	0.0233089	2_injured_3day_vs_2_injured_9day		Endoneurial fibroblasts
Tceb24	1.30687e-06	0.388027	0.676	0.54	0.0236269	2_injured_3day_vs_2_injured_9day		Endoneurial fibroblasts
Sorcs23	1.33348e-06	0.456113	0.32	0.165	0.0241079	2_injured_3day_vs_2_injured_9day		Endoneurial fibroblasts
D17H6S56E-53	1.3388e-06	0.416089	0.113	0.023	0.0242042	2_injured_3day_vs_2_injured_9day		Endoneurial fibroblasts
Rap1a3	1.35794e-06	0.458056	0.586	0.427	0.0245502	2_injured_3day_vs_2_injured_9day		Endoneurial fibroblasts
Tm4sf13	1.38194e-06	0.256315	0.786	0.627	0.024984	2_injured_3day_vs_2_injured_9day		Endoneurial fibroblasts
Rpl366	1.38896e-06	0.411519	0.437	0.272	0.0251111	2_injured_3day_vs_2_injured_9day		Endoneurial fibroblasts
Stt3a1	1.47036e-06	0.548941	0.515	0.36	0.0265827	2_injured_3day_vs_2_injured_9day		Endoneurial fibroblasts
Kng24	1.51179e-06	-0.774034	0.469	0.596	0.0273316	2_injured_3day_vs_2_injured_9day		Endoneurial fibroblasts
Ndufs62	1.53788e-06	0.271386	0.485	0.306	0.0278034	2_injured_3day_vs_2_injured_9day		Endoneurial fibroblasts
Zc3h155	1.54914e-06	0.521665	0.528	0.368	0.0280068	2_injured_3day_vs_2_injured_9day		Endoneurial fibroblasts
Nhsl2	1.6207e-06	0.421098	0.175	0.062	0.0293007	2_injured_3day_vs_2_injured_9day		Endoneurial fibroblasts
Sh3pxd2a3	1.67095e-06	0.306693	0.443	0.278	0.0302091	2_injured_3day_vs_2_injured_9day		Endoneurial fibroblasts
Sep155	1.70879e-06	0.390884	0.757	0.627	0.0308932	2_injured_3day_vs_2_injured_9day		Endoneurial fibroblasts
Ndufb74	1.71698e-06	0.366545	0.511	0.352	0.0310412	2_injured_3day_vs_2_injured_9day		Endoneurial fibroblasts
Sh3glb14	1.73734e-06	0.303469	0.573	0.419	0.0314093	2_injured_3day_vs_2_injured_9day		Endoneurial fibroblasts
U2af11	1.75278e-06	0.473596	0.269	0.123	0.0316885	2_injured_3day_vs_2_injured_9day		Endoneurial fibroblasts
Dlg31	1.77136e-06	0.343574	0.21	0.082	0.0320245	2_injured_3day_vs_2_injured_9day		Endoneurial fibroblasts
Slirp2	1.87598e-06	0.298149	0.453	0.293	0.0339159	2_injured_3day_vs_2_injured_9day		Endoneurial fibroblasts
Eml2	1.88068e-06	0.259931	0.168	0.057	0.0340009	2_injured_3day_vs_2_injured_9day		Endoneurial fibroblasts
Itgav2	1.88753e-06	0.424936	0.511	0.342	0.0341246	2_injured_3day_vs_2_injured_9day		Endoneurial fibroblasts
Prkar1a3	1.91502e-06	0.305347	0.586	0.419	0.0346217	2_injured_3day_vs_2_injured_9day		Endoneurial fibroblasts
Sfrp14	2.04996e-06	-0.89227	0.21	0.344	0.0370612	2_injured_3day_vs_2_injured_9day		Endoneurial fibroblasts
Maz1	2.08404e-06	0.502154	0.188	0.069	0.0376773	2_injured_3day_vs_2_injured_9day		Endoneurial fibroblasts
Srxn11	2.16289e-06	0.493694	0.265	0.126	0.0391029	2_injured_3day_vs_2_injured_9day		Endoneurial fibroblasts
Psmd112	2.16547e-06	0.346835	0.424	0.26	0.0391495	2_injured_3day_vs_2_injured_9day		Endoneurial fibroblasts
Vwa17	2.18961e-06	0.37875	0.472	0.316	0.039586	2_injured_3day_vs_2_injured_9day		Endoneurial fibroblasts
Eif5a5	2.23378e-06	0.519174	0.644	0.506	0.0403845	2_injured_3day_vs_2_injured_9day		Endoneurial fibroblasts
Pcbp13	2.23542e-06	0.308116	0.602	0.437	0.0404142	2_injured_3day_vs_2_injured_9day		Endoneurial fibroblasts
C36	2.26311e-06	-1.2681	0.502	0.555	0.0409147	2_injured_3day_vs_2_injured_9day		Endoneurial fibroblasts
Polr2l	2.28177e-06	0.378657	0.197	0.077	0.0412522	2_injured_3day_vs_2_injured_9day		Endoneurial fibroblasts
Atp5o4	2.30414e-06	0.384624	0.599	0.452	0.0416566	2_injured_3day_vs_2_injured_9day		Endoneurial fibroblasts
Foxd21	2.31387e-06	0.393344	0.252	0.116	0.0418325	2_injured_3day_vs_2_injured_9day		Endoneurial fibroblasts
Arhgdia3	2.3276e-06	0.36498	0.57	0.432	0.0420808	2_injured_3day_vs_2_injured_9day		Endoneurial fibroblasts
Copg12	2.36388e-06	0.272865	0.395	0.242	0.0427365	2_injured_3day_vs_2_injured_9day		Endoneurial fibroblasts
Hnrnpm3	2.37717e-06	0.507606	0.573	0.445	0.0429769	2_injured_3day_vs_2_injured_9day		Endoneurial fibroblasts
Ndufb95	2.43669e-06	0.499235	0.537	0.386	0.044053	2_injured_3day_vs_2_injured_9day		Endoneurial fibroblasts
Smc46	2.46401e-06	0.680881	0.392	0.237	0.0445468	2_injured_3day_vs_2_injured_9day		Endoneurial fibroblasts
Kpnb12	2.49405e-06	0.585645	0.447	0.288	0.04509	2_injured_3day_vs_2_injured_9day		Endoneurial fibroblasts
Eif3a4	2.53265e-06	0.425877	0.673	0.522	0.0457877	2_injured_3day_vs_2_injured_9day		Endoneurial fibroblasts
Flnb5	2.55989e-06	0.304265	0.275	0.136	0.0462802	2_injured_3day_vs_2_injured_9day		Endoneurial fibroblasts
Ano61	2.61967e-06	0.392891	0.573	0.414	0.0473611	2_injured_3day_vs_2_injured_9day		Endoneurial fibroblasts
Kif5b5	2.69459e-06	0.323676	0.654	0.53	0.0487156	2_injured_3day_vs_2_injured_9day		Endoneurial fibroblasts
Cd2483	2.70645e-06	0.369105	0.434	0.267	0.04893	2_injured_3day_vs_2_injured_9day		Endoneurial fibroblasts
Cfl15	2.72269e-06	0.441719	0.689	0.568	0.0492235	2_injured_3day_vs_2_injured_9day		Endoneurial fibroblasts
Timp14	3.05168e-113	-4.05302	0.036	0.871	5.51713e-109	2_uninjured_vs_2_injured_3day		Endoneurial fibroblasts
Dcn4	7.75954e-112	1.8459	1	0.997	1.40285e-107	2_uninjured_vs_2_injured_3day		Endoneurial fibroblasts
Spp15	6.79199e-111	-5.18702	0.215	0.948	1.22792e-106	2_uninjured_vs_2_injured_3day		Endoneurial fibroblasts
Smoc25	2.28513e-105	3.46134	0.983	0.602	4.13129e-101	2_uninjured_vs_2_injured_3day		Endoneurial fibroblasts
Gsn6	1.47814e-98	2.78905	0.99	0.877	2.67233e-94	2_uninjured_vs_2_injured_3day		Endoneurial fibroblasts
Wif1	4.25865e-88	-2.97561	0.012	0.718	7.69922e-84	2_uninjured_vs_2_injured_3day		Endoneurial fibroblasts
Fn15	2.44929e-80	-2.26792	0.746	0.958	4.42807e-76	2_uninjured_vs_2_injured_3day		Endoneurial fibroblasts
Cthrc15	2.09344e-79	-2.93927	0.156	0.809	3.78473e-75	2_uninjured_vs_2_injured_3day		Endoneurial fibroblasts
Fstl15	4.48871e-76	-1.778	0.754	0.948	8.11513e-72	2_uninjured_vs_2_injured_3day		Endoneurial fibroblasts
Ccl25	1.31712e-75	-3.08433	0.165	0.812	2.38123e-71	2_uninjured_vs_2_injured_3day		Endoneurial fibroblasts
Fbn23	1.70289e-75	-2.79092	0.038	0.676	3.07866e-71	2_uninjured_vs_2_injured_3day		Endoneurial fibroblasts
Crispld23	3.95332e-74	2.89465	0.895	0.505	7.1472e-70	2_uninjured_vs_2_injured_3day		Endoneurial fibroblasts
Gpc33	4.35586e-74	1.64162	0.981	0.9	7.87496e-70	2_uninjured_vs_2_injured_3day		Endoneurial fibroblasts
Itm2b4	1.25852e-70	1.70531	0.947	0.793	2.27528e-66	2_uninjured_vs_2_injured_3day		Endoneurial fibroblasts
Ctsl4	7.62066e-68	-2.07287	0.842	0.945	1.37774e-63	2_uninjured_vs_2_injured_3day		Endoneurial fibroblasts
Eef1b25	1.26764e-62	-1.93044	0.467	0.867	2.29176e-58	2_uninjured_vs_2_injured_3day		Endoneurial fibroblasts
Rplp13	2.35281e-62	-1.34147	0.876	0.939	4.25364e-58	2_uninjured_vs_2_injured_3day		Endoneurial fibroblasts
Lgals16	4.93044e-62	-1.48454	0.842	0.961	8.91374e-58	2_uninjured_vs_2_injured_3day		Endoneurial fibroblasts
Rps205	2.15073e-61	-1.61668	0.744	0.909	3.8883e-57	2_uninjured_vs_2_injured_3day		Endoneurial fibroblasts
Rpsa-ps104	1.24017e-59	-2.01598	0.203	0.761	2.2421e-55	2_uninjured_vs_2_injured_3day		Endoneurial fibroblasts
Col8a14	4.0567e-57	-1.57682	0.589	0.926	7.33411e-53	2_uninjured_vs_2_injured_3day		Endoneurial fibroblasts
Pabpc16	4.27803e-57	-1.35626	0.842	0.964	7.73425e-53	2_uninjured_vs_2_injured_3day		Endoneurial fibroblasts
Fos5	1.54494e-56	2.54783	0.911	0.809	2.79309e-52	2_uninjured_vs_2_injured_3day		Endoneurial fibroblasts
Enpp23	2.59147e-55	2.16138	0.828	0.456	4.68512e-51	2_uninjured_vs_2_injured_3day		Endoneurial fibroblasts
Emp16	1.00703e-54	-1.88114	0.246	0.803	1.8206e-50	2_uninjured_vs_2_injured_3day		Endoneurial fibroblasts
Col14a14	1.08536e-54	-1.76313	0.012	0.502	1.96222e-50	2_uninjured_vs_2_injured_3day		Endoneurial fibroblasts
Lyz26	1.92707e-54	-1.57137	0.007	0.489	3.48396e-50	2_uninjured_vs_2_injured_3day		Endoneurial fibroblasts
Ppap2b5	3.80567e-54	2.09954	0.833	0.463	6.88027e-50	2_uninjured_vs_2_injured_3day		Endoneurial fibroblasts
Tgfbi4	5.76632e-54	-1.5734	0.742	0.929	1.04249e-49	2_uninjured_vs_2_injured_3day		Endoneurial fibroblasts
Rbp16	1.34821e-53	-1.80915	0.065	0.599	2.43743e-49	2_uninjured_vs_2_injured_3day		Endoneurial fibroblasts
2005-06-01	2.0921e-53	2.31746	0.914	0.812	3.78231e-49	2_uninjured_vs_2_injured_3day		Endoneurial fibroblasts
Cpxm22	4.17698e-53	2.43912	0.672	0.136	7.55156e-49	2_uninjured_vs_2_injured_3day		Endoneurial fibroblasts
Kng22	9.68148e-53	-1.96993	0.005	0.469	1.75032e-48	2_uninjured_vs_2_injured_3day		Endoneurial fibroblasts
Igfbp46	1.66737e-52	-1.91684	0.507	0.864	3.01444e-48	2_uninjured_vs_2_injured_3day		Endoneurial fibroblasts
Ccl91	2.10723e-52	-2.08691	0.167	0.712	3.80965e-48	2_uninjured_vs_2_injured_3day		Endoneurial fibroblasts
Ecm13	2.44628e-52	2.20926	0.821	0.557	4.42264e-48	2_uninjured_vs_2_injured_3day		Endoneurial fibroblasts
Junb5	1.07796e-51	2.4316	0.859	0.663	1.94884e-47	2_uninjured_vs_2_injured_3day		Endoneurial fibroblasts
Gm175415	2.20798e-51	-1.44319	0.036	0.534	3.9918e-47	2_uninjured_vs_2_injured_3day		Endoneurial fibroblasts
Nipal1	2.9253e-51	-1.77414	0.081	0.608	5.28865e-47	2_uninjured_vs_2_injured_3day		Endoneurial fibroblasts
Serping14	3.24802e-50	1.3371	0.931	0.722	5.87209e-46	2_uninjured_vs_2_injured_3day		Endoneurial fibroblasts
Lgals32	7.99054e-50	-1.43388	0.045	0.544	1.44461e-45	2_uninjured_vs_2_injured_3day		Endoneurial fibroblasts
Serpinf12	1.96492e-49	1.40399	0.897	0.751	3.55238e-45	2_uninjured_vs_2_injured_3day		Endoneurial fibroblasts
Serpine22	5.7111e-49	-2.02504	0.431	0.848	1.03251e-44	2_uninjured_vs_2_injured_3day		Endoneurial fibroblasts
Abca62	8.36458e-49	2.33067	0.727	0.301	1.51223e-44	2_uninjured_vs_2_injured_3day		Endoneurial fibroblasts
Rarres25	9.86804e-49	1.76938	0.835	0.521	1.78404e-44	2_uninjured_vs_2_injured_3day		Endoneurial fibroblasts
Matn4	5.74322e-48	-1.97959	0.069	0.557	1.03832e-43	2_uninjured_vs_2_injured_3day		Endoneurial fibroblasts
Rps266	7.35299e-48	-1.41263	0.744	0.893	1.32935e-43	2_uninjured_vs_2_injured_3day		Endoneurial fibroblasts
Rpl21-ps44	1.32015e-47	-1.60298	0.1	0.608	2.3867e-43	2_uninjured_vs_2_injured_3day		Endoneurial fibroblasts
Gda4	1.07399e-46	-1.66395	0.026	0.476	1.94168e-42	2_uninjured_vs_2_injured_3day		Endoneurial fibroblasts
Gm100736	1.24837e-46	-1.58292	0.203	0.722	2.25692e-42	2_uninjured_vs_2_injured_3day		Endoneurial fibroblasts
Gm52444	5.31522e-46	-1.2167	0.024	0.466	9.60939e-42	2_uninjured_vs_2_injured_3day		Endoneurial fibroblasts
Rps245	2.10565e-45	-1.1663	0.754	0.913	3.80681e-41	2_uninjured_vs_2_injured_3day		Endoneurial fibroblasts
Cxadr	3.30336e-45	-1.42439	0.007	0.421	5.97214e-41	2_uninjured_vs_2_injured_3day		Endoneurial fibroblasts
Rdh103	5.16334e-45	-1.55864	0.038	0.489	9.3348e-41	2_uninjured_vs_2_injured_3day		Endoneurial fibroblasts
Ptx32	9.26372e-45	-2.00026	0.048	0.502	1.67479e-40	2_uninjured_vs_2_injured_3day		Endoneurial fibroblasts
S100a65	2.52954e-44	-1.1481	0.921	0.951	4.57315e-40	2_uninjured_vs_2_injured_3day		Endoneurial fibroblasts
Mgp4	3.47868e-43	-2.47701	0.337	0.799	6.28911e-39	2_uninjured_vs_2_injured_3day		Endoneurial fibroblasts
Sparcl15	4.00783e-43	1.51131	0.907	0.738	7.24575e-39	2_uninjured_vs_2_injured_3day		Endoneurial fibroblasts
Wdr895	6.04168e-43	-1.38344	0.598	0.854	1.09228e-38	2_uninjured_vs_2_injured_3day		Endoneurial fibroblasts
Tpm13	7.45457e-43	-1.81294	0.395	0.796	1.34771e-38	2_uninjured_vs_2_injured_3day		Endoneurial fibroblasts
Ctgf5	1.5524e-42	-1.84211	0.019	0.427	2.80658e-38	2_uninjured_vs_2_injured_3day		Endoneurial fibroblasts
Gm102635	4.08057e-42	-1.70137	0.256	0.722	7.37727e-38	2_uninjured_vs_2_injured_3day		Endoneurial fibroblasts
Gnb2l14	5.25783e-42	-1.24814	0.605	0.871	9.50563e-38	2_uninjured_vs_2_injured_3day		Endoneurial fibroblasts
Egr15	8.21375e-42	1.72766	0.88	0.816	1.48496e-37	2_uninjured_vs_2_injured_3day		Endoneurial fibroblasts
H2afj2	1.6164e-41	-1.40195	0.129	0.618	2.92229e-37	2_uninjured_vs_2_injured_3day		Endoneurial fibroblasts
Sox45	1.70237e-41	-1.34427	0.053	0.502	3.07771e-37	2_uninjured_vs_2_injured_3day		Endoneurial fibroblasts
Fetub	1.82102e-41	-1.52653	0.014	0.408	3.29223e-37	2_uninjured_vs_2_injured_3day		Endoneurial fibroblasts
Gm84445	2.30717e-41	-1.32264	0.098	0.576	4.17113e-37	2_uninjured_vs_2_injured_3day		Endoneurial fibroblasts
Ctnnb12	5.67913e-41	-1.35109	0.189	0.699	1.02673e-36	2_uninjured_vs_2_injured_3day		Endoneurial fibroblasts
Rpl325	8.85276e-41	-1.17115	0.739	0.887	1.60049e-36	2_uninjured_vs_2_injured_3day		Endoneurial fibroblasts
Gm65764	1.32828e-40	-1.34441	0.091	0.553	2.4014e-36	2_uninjured_vs_2_injured_3day		Endoneurial fibroblasts
Anxa23	2.66241e-40	-1.31734	0.646	0.883	4.81337e-36	2_uninjured_vs_2_injured_3day		Endoneurial fibroblasts
Rpsa5	3.72098e-40	-1.41863	0.366	0.786	6.72715e-36	2_uninjured_vs_2_injured_3day		Endoneurial fibroblasts
Gm102886	4.71005e-40	-1.67547	0.22	0.676	8.51531e-36	2_uninjured_vs_2_injured_3day		Endoneurial fibroblasts
Bgn5	6.0274e-40	-1.42424	0.435	0.819	1.08969e-35	2_uninjured_vs_2_injured_3day		Endoneurial fibroblasts
Col2a1	8.52207e-40	-1.74521	0.146	0.605	1.54071e-35	2_uninjured_vs_2_injured_3day		Endoneurial fibroblasts
Gm102755	3.53919e-39	-1.53978	0.232	0.673	6.3985e-35	2_uninjured_vs_2_injured_3day		Endoneurial fibroblasts
Rps10-ps15	5.54816e-39	-1.52183	0.337	0.748	1.00305e-34	2_uninjured_vs_2_injured_3day		Endoneurial fibroblasts
Rps26-ps15	7.43714e-39	-1.62499	0.383	0.773	1.34456e-34	2_uninjured_vs_2_injured_3day		Endoneurial fibroblasts
Tnc4	7.8742e-39	-1.32266	0	0.35	1.42358e-34	2_uninjured_vs_2_injured_3day		Endoneurial fibroblasts
Lxn4	1.38072e-38	-1.25804	0.053	0.472	2.4962e-34	2_uninjured_vs_2_injured_3day		Endoneurial fibroblasts
Rpl395	4.8248e-38	-1.28427	0.687	0.88	8.72275e-34	2_uninjured_vs_2_injured_3day		Endoneurial fibroblasts
Vit2	5.75085e-38	1.96778	0.651	0.278	1.0397e-33	2_uninjured_vs_2_injured_3day		Endoneurial fibroblasts
Lum3	6.2898e-38	0.881404	0.99	0.968	1.13713e-33	2_uninjured_vs_2_injured_3day		Endoneurial fibroblasts
C34	7.85885e-38	-1.35434	0.074	0.502	1.4208e-33	2_uninjured_vs_2_injured_3day		Endoneurial fibroblasts
Gm175114	1.63838e-37	-1.09533	0.05	0.46	2.96202e-33	2_uninjured_vs_2_injured_3day		Endoneurial fibroblasts
RP23-103I12.133	1.84456e-37	-1.51903	0.239	0.706	3.33479e-33	2_uninjured_vs_2_injured_3day		Endoneurial fibroblasts
H194	3.92685e-37	-1.91868	0.096	0.547	7.09936e-33	2_uninjured_vs_2_injured_3day		Endoneurial fibroblasts
Gm227615	6.21867e-37	-1.07909	0.062	0.482	1.12427e-32	2_uninjured_vs_2_injured_3day		Endoneurial fibroblasts
Ccnd12	9.64065e-37	-1.66934	0.187	0.638	1.74293e-32	2_uninjured_vs_2_injured_3day		Endoneurial fibroblasts
Thbd3	1.28987e-36	-1.26622	0.029	0.408	2.33196e-32	2_uninjured_vs_2_injured_3day		Endoneurial fibroblasts
Vwa15	2.37013e-36	1.60912	0.744	0.472	4.28496e-32	2_uninjured_vs_2_injured_3day		Endoneurial fibroblasts
Rarres1	2.61206e-36	-1.43195	0.06	0.463	4.72234e-32	2_uninjured_vs_2_injured_3day		Endoneurial fibroblasts
Crlf1	4.46635e-36	-1.0868	0	0.327	8.07472e-32	2_uninjured_vs_2_injured_3day		Endoneurial fibroblasts
Abi3bp3	5.11062e-36	1.58906	0.77	0.521	9.23949e-32	2_uninjured_vs_2_injured_3day		Endoneurial fibroblasts
Rpl9-ps66	5.15204e-36	-1.24627	0.167	0.628	9.31437e-32	2_uninjured_vs_2_injured_3day		Endoneurial fibroblasts
Lox4	8.34942e-36	-1.04593	0.022	0.382	1.50949e-31	2_uninjured_vs_2_injured_3day		Endoneurial fibroblasts
Cenpq4	8.66417e-36	-1.01404	0.038	0.424	1.56639e-31	2_uninjured_vs_2_injured_3day		Endoneurial fibroblasts
Myoc2	8.8247e-36	2.75023	0.486	0.065	1.59542e-31	2_uninjured_vs_2_injured_3day		Endoneurial fibroblasts
Gm100765	1.06119e-35	-1.37092	0.476	0.793	1.91853e-31	2_uninjured_vs_2_injured_3day		Endoneurial fibroblasts
Hif1a4	1.30734e-35	-1.37624	0.194	0.644	2.36355e-31	2_uninjured_vs_2_injured_3day		Endoneurial fibroblasts
Emb3	1.7319e-35	-1.1389	0.007	0.343	3.1311e-31	2_uninjured_vs_2_injured_3day		Endoneurial fibroblasts
Col1a22	2.13533e-35	0.926915	0.998	0.974	3.86047e-31	2_uninjured_vs_2_injured_3day		Endoneurial fibroblasts
Col11a1	3.42042e-35	-1.50065	0.148	0.589	6.18378e-31	2_uninjured_vs_2_injured_3day		Endoneurial fibroblasts
Fosb6	5.17178e-35	2.09065	0.816	0.712	9.35007e-31	2_uninjured_vs_2_injured_3day		Endoneurial fibroblasts
Col3a15	6.43261e-35	0.992023	0.995	0.961	1.16295e-30	2_uninjured_vs_2_injured_3day		Endoneurial fibroblasts
Myof3	7.52996e-35	-1.33417	0.053	0.447	1.36134e-30	2_uninjured_vs_2_injured_3day		Endoneurial fibroblasts
Thy13	8.4911e-35	-1.58863	0.34	0.741	1.53511e-30	2_uninjured_vs_2_injured_3day		Endoneurial fibroblasts
Loxl25	9.15442e-35	-1.50093	0.383	0.764	1.65503e-30	2_uninjured_vs_2_injured_3day		Endoneurial fibroblasts
Aig13	9.86349e-35	-0.976759	0.043	0.424	1.78322e-30	2_uninjured_vs_2_injured_3day		Endoneurial fibroblasts
Chl1	1.7026e-34	-1.2486	0.007	0.333	3.07813e-30	2_uninjured_vs_2_injured_3day		Endoneurial fibroblasts
Col15a15	1.98061e-34	1.05163	0.926	0.783	3.58074e-30	2_uninjured_vs_2_injured_3day		Endoneurial fibroblasts
Rpl13a-ps15	2.1334e-34	-1.12022	0.112	0.557	3.85697e-30	2_uninjured_vs_2_injured_3day		Endoneurial fibroblasts
Rps215	3.1988e-34	-1.02469	0.782	0.906	5.78311e-30	2_uninjured_vs_2_injured_3day		Endoneurial fibroblasts
Rpl415	5.40619e-34	-0.954581	0.835	0.893	9.77384e-30	2_uninjured_vs_2_injured_3day		Endoneurial fibroblasts
mt-Rnr24	6.64892e-34	0.80431	0.993	0.961	1.20206e-29	2_uninjured_vs_2_injured_3day		Endoneurial fibroblasts
Loxl32	7.46186e-34	-0.950937	0.081	0.505	1.34903e-29	2_uninjured_vs_2_injured_3day		Endoneurial fibroblasts
Saa3	9.32267e-34	-2.49842	0	0.307	1.68545e-29	2_uninjured_vs_2_injured_3day		Endoneurial fibroblasts
Itgb32	1.07035e-33	-1.24747	0.062	0.45	1.93509e-29	2_uninjured_vs_2_injured_3day		Endoneurial fibroblasts
Pdrg13	1.2222e-33	-1.52362	0.156	0.586	2.20962e-29	2_uninjured_vs_2_injured_3day		Endoneurial fibroblasts
Dpep13	1.39893e-33	2.20291	0.612	0.262	2.52913e-29	2_uninjured_vs_2_injured_3day		Endoneurial fibroblasts
Tgm23	1.76392e-33	-1.30655	0.163	0.612	3.18899e-29	2_uninjured_vs_2_injured_3day		Endoneurial fibroblasts
Trabd2b2	1.99984e-33	-1.07896	0.136	0.579	3.61552e-29	2_uninjured_vs_2_injured_3day		Endoneurial fibroblasts
Nme15	2.11481e-33	-1.22537	0.153	0.599	3.82336e-29	2_uninjured_vs_2_injured_3day		Endoneurial fibroblasts
Cd814	2.49064e-33	1.10394	0.878	0.757	4.50282e-29	2_uninjured_vs_2_injured_3day		Endoneurial fibroblasts
Aldh1a33	2.57837e-33	-1.92872	0.017	0.346	4.66144e-29	2_uninjured_vs_2_injured_3day		Endoneurial fibroblasts
Cgnl15	2.96725e-33	-1.04775	0.05	0.427	5.36448e-29	2_uninjured_vs_2_injured_3day		Endoneurial fibroblasts
Prdx52	3.8802e-33	-1.28373	0.438	0.799	7.01502e-29	2_uninjured_vs_2_injured_3day		Endoneurial fibroblasts
Foxd1	4.26865e-33	-1.3205	0.11	0.528	7.71729e-29	2_uninjured_vs_2_injured_3day		Endoneurial fibroblasts
Rps104	5.53354e-33	-1.18078	0.634	0.845	1.00041e-28	2_uninjured_vs_2_injured_3day		Endoneurial fibroblasts
Cp5	8.22747e-33	0.990146	0.976	0.893	1.48744e-28	2_uninjured_vs_2_injured_3day		Endoneurial fibroblasts
Plod33	8.37613e-33	-1.15121	0.156	0.599	1.51432e-28	2_uninjured_vs_2_injured_3day		Endoneurial fibroblasts
Gm224264	2.76951e-32	-1.06658	0.105	0.537	5.00699e-28	2_uninjured_vs_2_injured_3day		Endoneurial fibroblasts
Gstm16	3.14661e-32	2.00247	0.572	0.217	5.68875e-28	2_uninjured_vs_2_injured_3day		Endoneurial fibroblasts
Tmem176a	5.38541e-32	-1.03742	0.045	0.405	9.73628e-28	2_uninjured_vs_2_injured_3day		Endoneurial fibroblasts
Ppp3ca3	5.62316e-32	-1.31473	0.215	0.66	1.01661e-27	2_uninjured_vs_2_injured_3day		Endoneurial fibroblasts
Lama23	5.94755e-32	1.61831	0.739	0.518	1.07526e-27	2_uninjured_vs_2_injured_3day		Endoneurial fibroblasts
Sept115	1.70965e-31	-1.31377	0.368	0.773	3.09087e-27	2_uninjured_vs_2_injured_3day		Endoneurial fibroblasts
Tnfrsf12a5	3.65065e-31	-0.965052	0.029	0.362	6.60002e-27	2_uninjured_vs_2_injured_3day		Endoneurial fibroblasts
Plod22	6.05337e-31	-0.929333	0.06	0.43	1.09439e-26	2_uninjured_vs_2_injured_3day		Endoneurial fibroblasts
Tm4sf11	9.59531e-31	-1.30824	0.404	0.786	1.73474e-26	2_uninjured_vs_2_injured_3day		Endoneurial fibroblasts
Col6a35	1.30897e-30	-1.23852	0.433	0.79	2.36648e-26	2_uninjured_vs_2_injured_3day		Endoneurial fibroblasts
Apoe6	1.34482e-30	2.24438	0.818	0.715	2.43131e-26	2_uninjured_vs_2_injured_3day		Endoneurial fibroblasts
Ogn5	2.86964e-30	1.30825	0.842	0.657	5.18802e-26	2_uninjured_vs_2_injured_3day		Endoneurial fibroblasts
Spred12	3.26845e-30	-1.19462	0.203	0.615	5.90904e-26	2_uninjured_vs_2_injured_3day		Endoneurial fibroblasts
Ppp1r15a6	6.03152e-30	2.48596	0.589	0.265	1.09044e-25	2_uninjured_vs_2_injured_3day		Endoneurial fibroblasts
Abca14	6.57308e-30	-0.756465	0.01	0.304	1.18835e-25	2_uninjured_vs_2_injured_3day		Endoneurial fibroblasts
Lgmn4	6.75373e-30	-1.07576	0.093	0.485	1.22101e-25	2_uninjured_vs_2_injured_3day		Endoneurial fibroblasts
Angptl74	8.72339e-30	2.58169	0.679	0.408	1.5771e-25	2_uninjured_vs_2_injured_3day		Endoneurial fibroblasts
Bicc12	1.02834e-29	-1.38742	0.56	0.812	1.85914e-25	2_uninjured_vs_2_injured_3day		Endoneurial fibroblasts
Sgk12	1.02996e-29	-1.23783	0.172	0.602	1.86206e-25	2_uninjured_vs_2_injured_3day		Endoneurial fibroblasts
Saa1	1.16866e-29	-1.30711	0.022	0.33	2.11282e-25	2_uninjured_vs_2_injured_3day		Endoneurial fibroblasts
1994-09-01	1.18658e-29	-1.1564	0.201	0.628	2.14521e-25	2_uninjured_vs_2_injured_3day		Endoneurial fibroblasts
Adam94	1.70387e-29	-1.04348	0.117	0.524	3.08042e-25	2_uninjured_vs_2_injured_3day		Endoneurial fibroblasts
Ddb12	1.82528e-29	-1.17267	0.215	0.644	3.29992e-25	2_uninjured_vs_2_injured_3day		Endoneurial fibroblasts
Ramp22	2.37945e-29	1.6088	0.684	0.414	4.30181e-25	2_uninjured_vs_2_injured_3day		Endoneurial fibroblasts
Mir6825	2.5276e-29	-1.05569	0.153	0.57	4.56964e-25	2_uninjured_vs_2_injured_3day		Endoneurial fibroblasts
Rpl345	3.10899e-29	-1.2444	0.337	0.725	5.62074e-25	2_uninjured_vs_2_injured_3day		Endoneurial fibroblasts
Zfp364	3.62727e-29	2.112	0.761	0.602	6.55773e-25	2_uninjured_vs_2_injured_3day		Endoneurial fibroblasts
Sparc4	4.80273e-29	0.749517	0.993	0.984	8.68286e-25	2_uninjured_vs_2_injured_3day		Endoneurial fibroblasts
Flna5	9.42539e-29	-0.891713	0.158	0.592	1.70402e-24	2_uninjured_vs_2_injured_3day		Endoneurial fibroblasts
Cxx1b	1.01135e-28	-1.18615	0.194	0.608	1.82842e-24	2_uninjured_vs_2_injured_3day		Endoneurial fibroblasts
Htra14	1.04996e-28	1.08984	0.825	0.628	1.89823e-24	2_uninjured_vs_2_injured_3day		Endoneurial fibroblasts
Ctsb4	1.68569e-28	-0.796677	0.902	0.939	3.04757e-24	2_uninjured_vs_2_injured_3day		Endoneurial fibroblasts
Kng1	1.73697e-28	-0.999582	0	0.262	3.14026e-24	2_uninjured_vs_2_injured_3day		Endoneurial fibroblasts
Abca93	3.22833e-28	1.48335	0.703	0.469	5.83651e-24	2_uninjured_vs_2_injured_3day		Endoneurial fibroblasts
Ank1	3.39353e-28	-1.13804	0.179	0.592	6.13515e-24	2_uninjured_vs_2_injured_3day		Endoneurial fibroblasts
Emilin22	4.8663e-28	-0.913721	0.045	0.375	8.79778e-24	2_uninjured_vs_2_injured_3day		Endoneurial fibroblasts
Ckap45	5.39007e-28	-1.21124	0.385	0.761	9.74471e-24	2_uninjured_vs_2_injured_3day		Endoneurial fibroblasts
Il6st4	6.69694e-28	-1.33237	0.464	0.773	1.21074e-23	2_uninjured_vs_2_injured_3day		Endoneurial fibroblasts
Igfbp33	7.25646e-28	-1.14424	0.017	0.304	1.3119e-23	2_uninjured_vs_2_injured_3day		Endoneurial fibroblasts
Rplp25	9.26466e-28	-0.935373	0.768	0.871	1.67496e-23	2_uninjured_vs_2_injured_3day		Endoneurial fibroblasts
Gm20004	1.53099e-27	-1.13981	0.165	0.566	2.76789e-23	2_uninjured_vs_2_injured_3day		Endoneurial fibroblasts
Pkm4	1.62122e-27	-1.215	0.206	0.605	2.931e-23	2_uninjured_vs_2_injured_3day		Endoneurial fibroblasts
Pkdcc2	1.79206e-27	-1.08345	0.139	0.518	3.23986e-23	2_uninjured_vs_2_injured_3day		Endoneurial fibroblasts
Ier26	1.85916e-27	1.94691	0.809	0.689	3.36118e-23	2_uninjured_vs_2_injured_3day		Endoneurial fibroblasts
Bzw24	1.91403e-27	-1.19622	0.201	0.618	3.46038e-23	2_uninjured_vs_2_injured_3day		Endoneurial fibroblasts
C1s2	2.05745e-27	1.1325	0.809	0.647	3.71967e-23	2_uninjured_vs_2_injured_3day		Endoneurial fibroblasts
Osmr2	2.61492e-27	-0.886745	0.067	0.417	4.72751e-23	2_uninjured_vs_2_injured_3day		Endoneurial fibroblasts
Rpl122	3.51608e-27	-0.765116	0.077	0.437	6.35672e-23	2_uninjured_vs_2_injured_3day		Endoneurial fibroblasts
Crispld14	5.65223e-27	-1.0649	0.117	0.498	1.02187e-22	2_uninjured_vs_2_injured_3day		Endoneurial fibroblasts
Hmgcs12	6.77528e-27	1.96157	0.457	0.12	1.2249e-22	2_uninjured_vs_2_injured_3day		Endoneurial fibroblasts
Rps85	8.20789e-27	-1.04263	0.581	0.832	1.4839e-22	2_uninjured_vs_2_injured_3day		Endoneurial fibroblasts
Gm227595	1.07401e-26	-0.667746	0.036	0.343	1.9417e-22	2_uninjured_vs_2_injured_3day		Endoneurial fibroblasts
Atp5g34	1.16e-26	-1.11312	0.361	0.725	2.09717e-22	2_uninjured_vs_2_injured_3day		Endoneurial fibroblasts
Tspan63	1.19478e-26	-1.09395	0.086	0.44	2.16004e-22	2_uninjured_vs_2_injured_3day		Endoneurial fibroblasts
Ubb4	1.68047e-26	1.28551	0.792	0.615	3.03811e-22	2_uninjured_vs_2_injured_3day		Endoneurial fibroblasts
Gm42044	2.09043e-26	-0.903407	0.141	0.531	3.77929e-22	2_uninjured_vs_2_injured_3day		Endoneurial fibroblasts
Sh3bgrl35	2.49238e-26	-1.09083	0.23	0.634	4.50597e-22	2_uninjured_vs_2_injured_3day		Endoneurial fibroblasts
Gm102606	3.30143e-26	-1.15895	0.469	0.77	5.96866e-22	2_uninjured_vs_2_injured_3day		Endoneurial fibroblasts
Ptprs3	4.16764e-26	-0.838642	0.11	0.485	7.53467e-22	2_uninjured_vs_2_injured_3day		Endoneurial fibroblasts
Fam120a2	5.35609e-26	-0.758456	0.081	0.434	9.68327e-22	2_uninjured_vs_2_injured_3day		Endoneurial fibroblasts
Fblim16	5.96294e-26	-0.775004	0.007	0.262	1.07804e-21	2_uninjured_vs_2_injured_3day		Endoneurial fibroblasts
Sc4mol	5.97295e-26	1.89097	0.402	0.078	1.07985e-21	2_uninjured_vs_2_injured_3day		Endoneurial fibroblasts
Cd445	6.33e-26	-0.875364	0.079	0.421	1.1444e-21	2_uninjured_vs_2_injured_3day		Endoneurial fibroblasts
Pi163	6.34807e-26	-0.999326	0.084	0.434	1.14767e-21	2_uninjured_vs_2_injured_3day		Endoneurial fibroblasts
C1qtnf64	6.66541e-26	-0.696859	0.108	0.482	1.20504e-21	2_uninjured_vs_2_injured_3day		Endoneurial fibroblasts
S1pr31	7.78943e-26	-0.980531	0.091	0.447	1.40825e-21	2_uninjured_vs_2_injured_3day		Endoneurial fibroblasts
Rpl13a2	8.76865e-26	-0.762532	0.809	0.89	1.58528e-21	2_uninjured_vs_2_injured_3day		Endoneurial fibroblasts
Abracl4	1.0455e-25	-0.886914	0.103	0.466	1.89015e-21	2_uninjured_vs_2_injured_3day		Endoneurial fibroblasts
Lhfpl25	1.05366e-25	-0.980218	0.096	0.453	1.90491e-21	2_uninjured_vs_2_injured_3day		Endoneurial fibroblasts
Steap11	1.46167e-25	-0.688035	0	0.236	2.64256e-21	2_uninjured_vs_2_injured_3day		Endoneurial fibroblasts
Stat33	1.72816e-25	-0.841854	0.144	0.54	3.12434e-21	2_uninjured_vs_2_injured_3day		Endoneurial fibroblasts
Ptrf5	2.11121e-25	-1.00625	0.608	0.848	3.81685e-21	2_uninjured_vs_2_injured_3day		Endoneurial fibroblasts
Ggta1	3.29421e-25	-0.644088	0.031	0.317	5.95561e-21	2_uninjured_vs_2_injured_3day		Endoneurial fibroblasts
Capg4	3.37852e-25	-0.849385	0.112	0.476	6.10802e-21	2_uninjured_vs_2_injured_3day		Endoneurial fibroblasts
Ugcg6	3.43397e-25	-1.00099	0.053	0.362	6.20827e-21	2_uninjured_vs_2_injured_3day		Endoneurial fibroblasts
Psap4	4.97124e-25	0.995244	0.787	0.696	8.98751e-21	2_uninjured_vs_2_injured_3day		Endoneurial fibroblasts
Rpl13-ps35	5.0256e-25	-1.0905	0.304	0.667	9.08578e-21	2_uninjured_vs_2_injured_3day		Endoneurial fibroblasts
Rps34	5.20381e-25	-0.972947	0.749	0.867	9.40797e-21	2_uninjured_vs_2_injured_3day		Endoneurial fibroblasts
Atf45	5.22102e-25	1.51411	0.737	0.612	9.43908e-21	2_uninjured_vs_2_injured_3day		Endoneurial fibroblasts
Gja13	5.50315e-25	-0.962107	0.053	0.362	9.94914e-21	2_uninjured_vs_2_injured_3day		Endoneurial fibroblasts
S100a116	6.89507e-25	-1.09144	0.553	0.809	1.24656e-20	2_uninjured_vs_2_injured_3day		Endoneurial fibroblasts
Sfrp45	1.01713e-24	-0.921706	0.089	0.434	1.83888e-20	2_uninjured_vs_2_injured_3day		Endoneurial fibroblasts
Actn15	1.05807e-24	-0.863611	0.036	0.32	1.91289e-20	2_uninjured_vs_2_injured_3day		Endoneurial fibroblasts
Rps185	1.23863e-24	-0.877915	0.086	0.427	2.23931e-20	2_uninjured_vs_2_injured_3day		Endoneurial fibroblasts
Pdia65	1.23987e-24	-1.09958	0.5	0.79	2.24155e-20	2_uninjured_vs_2_injured_3day		Endoneurial fibroblasts
Rps3a15	1.43873e-24	-1.05278	0.593	0.819	2.60109e-20	2_uninjured_vs_2_injured_3day		Endoneurial fibroblasts
Atp5e2	1.44604e-24	-1.01275	0.488	0.79	2.61429e-20	2_uninjured_vs_2_injured_3day		Endoneurial fibroblasts
Trip122	1.77456e-24	-0.649982	0.112	0.482	3.20822e-20	2_uninjured_vs_2_injured_3day		Endoneurial fibroblasts
Gm39405	2.02548e-24	-0.824717	0.165	0.56	3.66187e-20	2_uninjured_vs_2_injured_3day		Endoneurial fibroblasts
Reln	2.06416e-24	-1.00891	0.06	0.369	3.7318e-20	2_uninjured_vs_2_injured_3day		Endoneurial fibroblasts
Rtn45	2.42567e-24	-1.01422	0.34	0.735	4.38538e-20	2_uninjured_vs_2_injured_3day		Endoneurial fibroblasts
Gm174305	2.95183e-24	-0.717993	0.093	0.443	5.33661e-20	2_uninjured_vs_2_injured_3day		Endoneurial fibroblasts
Dpysl36	3.23211e-24	-0.900216	0.132	0.508	5.84333e-20	2_uninjured_vs_2_injured_3day		Endoneurial fibroblasts
Mfap3l	3.7381e-24	-0.87274	0.06	0.372	6.75811e-20	2_uninjured_vs_2_injured_3day		Endoneurial fibroblasts
Prkar1a1	3.95828e-24	-0.843196	0.191	0.586	7.15617e-20	2_uninjured_vs_2_injured_3day		Endoneurial fibroblasts
Ldha4	4.06254e-24	-1.08427	0.282	0.68	7.34467e-20	2_uninjured_vs_2_injured_3day		Endoneurial fibroblasts
Adamts92	4.62588e-24	-0.770846	0.029	0.301	8.36312e-20	2_uninjured_vs_2_injured_3day		Endoneurial fibroblasts
Podn3	4.83607e-24	1.46695	0.469	0.159	8.74314e-20	2_uninjured_vs_2_injured_3day		Endoneurial fibroblasts
Tspan42	4.88631e-24	-0.867382	0.089	0.427	8.83396e-20	2_uninjured_vs_2_injured_3day		Endoneurial fibroblasts
Cyr615	5.2299e-24	-0.90783	0.191	0.573	9.45514e-20	2_uninjured_vs_2_injured_3day		Endoneurial fibroblasts
Pdlim41	5.27127e-24	-0.920601	0.136	0.502	9.52993e-20	2_uninjured_vs_2_injured_3day		Endoneurial fibroblasts
S100a45	5.818e-24	-0.658675	0.079	0.414	1.05184e-19	2_uninjured_vs_2_injured_3day		Endoneurial fibroblasts
Col28a1	6.8801e-24	-0.98374	0.182	0.576	1.24385e-19	2_uninjured_vs_2_injured_3day		Endoneurial fibroblasts
Smarcc15	9.47905e-24	-0.896009	0.129	0.495	1.71372e-19	2_uninjured_vs_2_injured_3day		Endoneurial fibroblasts
Ndufa42	9.75172e-24	-1.04859	0.428	0.764	1.76301e-19	2_uninjured_vs_2_injured_3day		Endoneurial fibroblasts
Fbln25	1.11613e-23	1.42057	0.696	0.502	2.01786e-19	2_uninjured_vs_2_injured_3day		Endoneurial fibroblasts
Trib14	1.22834e-23	-1.17477	0.074	0.392	2.22072e-19	2_uninjured_vs_2_injured_3day		Endoneurial fibroblasts
Rpl135	1.47954e-23	-0.963113	0.584	0.809	2.67486e-19	2_uninjured_vs_2_injured_3day		Endoneurial fibroblasts
Gm118084	1.54075e-23	-0.801634	0.041	0.327	2.78553e-19	2_uninjured_vs_2_injured_3day		Endoneurial fibroblasts
Ccl75	1.9677e-23	-0.805951	0.359	0.751	3.55741e-19	2_uninjured_vs_2_injured_3day		Endoneurial fibroblasts
Gm249514	2.52353e-23	-0.756316	0.031	0.301	4.56229e-19	2_uninjured_vs_2_injured_3day		Endoneurial fibroblasts
Ywhag2	3.267e-23	-0.929369	0.17	0.544	5.90641e-19	2_uninjured_vs_2_injured_3day		Endoneurial fibroblasts
Mlec2	3.42649e-23	-0.999439	0.203	0.595	6.19474e-19	2_uninjured_vs_2_injured_3day		Endoneurial fibroblasts
Tmem176b1	4.08215e-23	-0.936875	0.089	0.417	7.38011e-19	2_uninjured_vs_2_injured_3day		Endoneurial fibroblasts
Itgav	4.51439e-23	-0.909546	0.148	0.511	8.16156e-19	2_uninjured_vs_2_injured_3day		Endoneurial fibroblasts
Marcksl16	5.93887e-23	-0.720811	0.038	0.314	1.07369e-18	2_uninjured_vs_2_injured_3day		Endoneurial fibroblasts
Igf15	6.90059e-23	-1.00813	0.447	0.767	1.24756e-18	2_uninjured_vs_2_injured_3day		Endoneurial fibroblasts
Tmsb4x2	6.93588e-23	-0.820671	0.732	0.864	1.25394e-18	2_uninjured_vs_2_injured_3day		Endoneurial fibroblasts
Angptl2	7.1192e-23	-0.78337	0.072	0.385	1.28708e-18	2_uninjured_vs_2_injured_3day		Endoneurial fibroblasts
Nsg13	8.16182e-23	-0.858589	0.124	0.476	1.47558e-18	2_uninjured_vs_2_injured_3day		Endoneurial fibroblasts
Vmp14	9.22183e-23	-0.957226	0.134	0.495	1.66721e-18	2_uninjured_vs_2_injured_3day		Endoneurial fibroblasts
Gm49684	9.32759e-23	-0.691804	0.053	0.346	1.68634e-18	2_uninjured_vs_2_injured_3day		Endoneurial fibroblasts
Metrn	9.42702e-23	-0.733826	0.01	0.239	1.70431e-18	2_uninjured_vs_2_injured_3day		Endoneurial fibroblasts
Rps3a24	9.7963e-23	-0.665377	0.041	0.32	1.77107e-18	2_uninjured_vs_2_injured_3day		Endoneurial fibroblasts
Rpl225	1.13613e-22	-0.931978	0.593	0.822	2.05401e-18	2_uninjured_vs_2_injured_3day		Endoneurial fibroblasts
Eif5b5	1.56644e-22	-0.955796	0.313	0.702	2.83196e-18	2_uninjured_vs_2_injured_3day		Endoneurial fibroblasts
Gm150135	1.79938e-22	-0.887397	0.045	0.327	3.2531e-18	2_uninjured_vs_2_injured_3day		Endoneurial fibroblasts
Tagln22	2.74317e-22	-0.92844	0.132	0.466	4.95938e-18	2_uninjured_vs_2_injured_3day		Endoneurial fibroblasts
Car42	4.67799e-22	-0.74336	0.012	0.239	8.45733e-18	2_uninjured_vs_2_injured_3day		Endoneurial fibroblasts
Cfh2	5.44674e-22	-0.807768	0.036	0.301	9.84717e-18	2_uninjured_vs_2_injured_3day		Endoneurial fibroblasts
Gm119834	5.44728e-22	-0.589998	0	0.204	9.84814e-18	2_uninjured_vs_2_injured_3day		Endoneurial fibroblasts
Rps94	5.7305e-22	-0.762284	0.811	0.864	1.03602e-17	2_uninjured_vs_2_injured_3day		Endoneurial fibroblasts
Slc7a8	7.67808e-22	-0.535869	0.002	0.21	1.38812e-17	2_uninjured_vs_2_injured_3day		Endoneurial fibroblasts
Epb4.1l32	8.19113e-22	-0.886709	0.11	0.437	1.48087e-17	2_uninjured_vs_2_injured_3day		Endoneurial fibroblasts
Mmp24	8.35692e-22	0.689265	0.94	0.867	1.51085e-17	2_uninjured_vs_2_injured_3day		Endoneurial fibroblasts
Aprt5	9.38055e-22	-0.714448	0.112	0.45	1.69591e-17	2_uninjured_vs_2_injured_3day		Endoneurial fibroblasts
Eef1g4	9.67086e-22	-0.938333	0.301	0.67	1.74839e-17	2_uninjured_vs_2_injured_3day		Endoneurial fibroblasts
Mtch14	1.05391e-21	-0.976021	0.206	0.579	1.90537e-17	2_uninjured_vs_2_injured_3day		Endoneurial fibroblasts
Zmiz12	1.11463e-21	-0.837815	0.129	0.472	2.01515e-17	2_uninjured_vs_2_injured_3day		Endoneurial fibroblasts
Matn23	1.20023e-21	1.12474	0.789	0.686	2.1699e-17	2_uninjured_vs_2_injured_3day		Endoneurial fibroblasts
Dync1h12	1.61039e-21	-0.684555	0.103	0.43	2.91142e-17	2_uninjured_vs_2_injured_3day		Endoneurial fibroblasts
Surf44	1.65975e-21	-0.950376	0.278	0.657	3.00067e-17	2_uninjured_vs_2_injured_3day		Endoneurial fibroblasts
Man2a14	1.93317e-21	-0.937043	0.112	0.434	3.49498e-17	2_uninjured_vs_2_injured_3day		Endoneurial fibroblasts
Socs36	2.02293e-21	2.04816	0.603	0.385	3.65725e-17	2_uninjured_vs_2_injured_3day		Endoneurial fibroblasts
Dio2	2.23348e-21	-1.1004	0.012	0.233	4.03791e-17	2_uninjured_vs_2_injured_3day		Endoneurial fibroblasts
Samd5	2.3878e-21	-0.549221	0.007	0.22	4.31691e-17	2_uninjured_vs_2_injured_3day		Endoneurial fibroblasts
Serpina3n1	2.49858e-21	-0.637711	0.055	0.337	4.51718e-17	2_uninjured_vs_2_injured_3day		Endoneurial fibroblasts
Rpl144	2.98262e-21	-0.747804	0.706	0.864	5.39227e-17	2_uninjured_vs_2_injured_3day		Endoneurial fibroblasts
Cd972	3.34309e-21	-0.696353	0.019	0.249	6.04398e-17	2_uninjured_vs_2_injured_3day		Endoneurial fibroblasts
Raly4	3.51079e-21	-0.834658	0.1	0.417	6.34715e-17	2_uninjured_vs_2_injured_3day		Endoneurial fibroblasts
Calm33	3.73602e-21	-0.774654	0.23	0.625	6.75435e-17	2_uninjured_vs_2_injured_3day		Endoneurial fibroblasts
Ube2m2	4.78973e-21	-0.599178	0.043	0.307	8.65936e-17	2_uninjured_vs_2_injured_3day		Endoneurial fibroblasts
Psmd133	4.89103e-21	-0.555868	0.091	0.411	8.84249e-17	2_uninjured_vs_2_injured_3day		Endoneurial fibroblasts
Sema7a3	5.05423e-21	-0.655492	0.007	0.217	9.13755e-17	2_uninjured_vs_2_injured_3day		Endoneurial fibroblasts
Cxcl22	5.09207e-21	-0.374895	0.005	0.21	9.20595e-17	2_uninjured_vs_2_injured_3day		Endoneurial fibroblasts
Ttyh22	5.13395e-21	-0.663028	0.062	0.35	9.28166e-17	2_uninjured_vs_2_injured_3day		Endoneurial fibroblasts
Jund4	5.89946e-21	1.06071	0.811	0.689	1.06656e-16	2_uninjured_vs_2_injured_3day		Endoneurial fibroblasts
Tead12	6.91219e-21	-0.691904	0.045	0.311	1.24965e-16	2_uninjured_vs_2_injured_3day		Endoneurial fibroblasts
Npm15	7.32943e-21	-1.06116	0.313	0.657	1.32509e-16	2_uninjured_vs_2_injured_3day		Endoneurial fibroblasts
Atp1a15	9.18456e-21	-0.655775	0.074	0.366	1.66048e-16	2_uninjured_vs_2_injured_3day		Endoneurial fibroblasts
Mif4	1.14705e-20	-0.919265	0.141	0.472	2.07374e-16	2_uninjured_vs_2_injured_3day		Endoneurial fibroblasts
Orc54	1.20598e-20	-0.97036	0.287	0.657	2.18029e-16	2_uninjured_vs_2_injured_3day		Endoneurial fibroblasts
Thsd4	1.25319e-20	-0.583792	0.065	0.346	2.26564e-16	2_uninjured_vs_2_injured_3day		Endoneurial fibroblasts
mt-Cytb3	1.40027e-20	0.665456	0.95	0.877	2.53155e-16	2_uninjured_vs_2_injured_3day		Endoneurial fibroblasts
Serinc5	1.47336e-20	-0.623194	0.089	0.395	2.66369e-16	2_uninjured_vs_2_injured_3day		Endoneurial fibroblasts
Synpo3	1.69366e-20	-0.651537	0.029	0.269	3.06197e-16	2_uninjured_vs_2_injured_3day		Endoneurial fibroblasts
H2afy4	1.75159e-20	-0.73382	0.093	0.405	3.16669e-16	2_uninjured_vs_2_injured_3day		Endoneurial fibroblasts
Cct22	1.79682e-20	-0.764112	0.151	0.502	3.24847e-16	2_uninjured_vs_2_injured_3day		Endoneurial fibroblasts
Piezo14	1.82333e-20	-0.622062	0.053	0.324	3.2964e-16	2_uninjured_vs_2_injured_3day		Endoneurial fibroblasts
Rpl235	1.8655e-20	-0.884984	0.658	0.825	3.37264e-16	2_uninjured_vs_2_injured_3day		Endoneurial fibroblasts
Rps210	2.1057e-20	-0.602248	0.062	0.343	3.8069e-16	2_uninjured_vs_2_injured_3day		Endoneurial fibroblasts
1810011O10Rik5	2.22914e-20	-0.478381	0.019	0.243	4.03007e-16	2_uninjured_vs_2_injured_3day		Endoneurial fibroblasts
Fkbp112	2.45534e-20	-0.646889	0.115	0.437	4.439e-16	2_uninjured_vs_2_injured_3day		Endoneurial fibroblasts
Trf3	2.48508e-20	-1.81373	0.435	0.741	4.49278e-16	2_uninjured_vs_2_injured_3day		Endoneurial fibroblasts
Rps15a5	3.69623e-20	-0.79977	0.742	0.845	6.68241e-16	2_uninjured_vs_2_injured_3day		Endoneurial fibroblasts
P4hb4	4.36443e-20	-0.937478	0.586	0.809	7.89044e-16	2_uninjured_vs_2_injured_3day		Endoneurial fibroblasts
Timp35	4.36488e-20	-1.37563	0.522	0.79	7.89127e-16	2_uninjured_vs_2_injured_3day		Endoneurial fibroblasts
Gmfb	4.5234e-20	-0.614259	0.086	0.388	8.17786e-16	2_uninjured_vs_2_injured_3day		Endoneurial fibroblasts
Eif2s24	4.56315e-20	-0.860304	0.316	0.683	8.24971e-16	2_uninjured_vs_2_injured_3day		Endoneurial fibroblasts
Gpi12	4.6084e-20	-0.725786	0.136	0.482	8.33152e-16	2_uninjured_vs_2_injured_3day		Endoneurial fibroblasts
Hk22	4.67186e-20	-0.625315	0.074	0.362	8.44625e-16	2_uninjured_vs_2_injured_3day		Endoneurial fibroblasts
Lap32	5.03391e-20	-0.654917	0.163	0.515	9.10081e-16	2_uninjured_vs_2_injured_3day		Endoneurial fibroblasts
Gm240984	5.03642e-20	-0.465241	0.026	0.259	9.10535e-16	2_uninjured_vs_2_injured_3day		Endoneurial fibroblasts
Pnmal22	5.10514e-20	-0.673455	0.05	0.311	9.22959e-16	2_uninjured_vs_2_injured_3day		Endoneurial fibroblasts
Gm102696	5.79711e-20	-0.909626	0.289	0.657	1.04806e-15	2_uninjured_vs_2_injured_3day		Endoneurial fibroblasts
Fgf72	5.82042e-20	-0.764374	0.062	0.333	1.05227e-15	2_uninjured_vs_2_injured_3day		Endoneurial fibroblasts
Prdx24	6.27281e-20	-0.897134	0.299	0.67	1.13406e-15	2_uninjured_vs_2_injured_3day		Endoneurial fibroblasts
Gm225824	7.00967e-20	-0.489359	0.014	0.227	1.26728e-15	2_uninjured_vs_2_injured_3day		Endoneurial fibroblasts
Actn44	7.39105e-20	-0.779841	0.179	0.537	1.33623e-15	2_uninjured_vs_2_injured_3day		Endoneurial fibroblasts
Golm14	8.46739e-20	-0.724558	0.048	0.304	1.53082e-15	2_uninjured_vs_2_injured_3day		Endoneurial fibroblasts
Insig1	9.13547e-20	1.35318	0.275	0.023	1.6516e-15	2_uninjured_vs_2_injured_3day		Endoneurial fibroblasts
Xist5	9.95195e-20	-0.943346	0.189	0.54	1.79921e-15	2_uninjured_vs_2_injured_3day		Endoneurial fibroblasts
Pxdn6	1.00444e-19	-0.635825	0.105	0.417	1.81593e-15	2_uninjured_vs_2_injured_3day		Endoneurial fibroblasts
Psmd141	1.05382e-19	-0.753014	0.077	0.362	1.9052e-15	2_uninjured_vs_2_injured_3day		Endoneurial fibroblasts
Gm50935	1.12352e-19	-0.687228	0.026	0.256	2.03122e-15	2_uninjured_vs_2_injured_3day		Endoneurial fibroblasts
Tuba1c4	1.22997e-19	-0.632903	0.036	0.278	2.22367e-15	2_uninjured_vs_2_injured_3day		Endoneurial fibroblasts
Stra6	1.52018e-19	-0.568285	0	0.181	2.74833e-15	2_uninjured_vs_2_injured_3day		Endoneurial fibroblasts
Nnmt1	1.69689e-19	-0.734853	0.057	0.317	3.06782e-15	2_uninjured_vs_2_injured_3day		Endoneurial fibroblasts
Psmd22	1.71177e-19	-0.77119	0.167	0.515	3.09471e-15	2_uninjured_vs_2_injured_3day		Endoneurial fibroblasts
Mmp192	1.96481e-19	-0.768597	0.211	0.579	3.55217e-15	2_uninjured_vs_2_injured_3day		Endoneurial fibroblasts
Ppfibp14	1.98267e-19	-0.714731	0.117	0.437	3.58447e-15	2_uninjured_vs_2_injured_3day		Endoneurial fibroblasts
Pvrl2	2.08313e-19	-0.593734	0.041	0.288	3.76608e-15	2_uninjured_vs_2_injured_3day		Endoneurial fibroblasts
Rplp04	2.13086e-19	-0.819545	0.715	0.828	3.85239e-15	2_uninjured_vs_2_injured_3day		Endoneurial fibroblasts
Acot71	2.87171e-19	-0.616246	0.022	0.239	5.19177e-15	2_uninjured_vs_2_injured_3day		Endoneurial fibroblasts
Ctla2a4	3.00181e-19	-0.560071	0.041	0.288	5.42697e-15	2_uninjured_vs_2_injured_3day		Endoneurial fibroblasts
Rpl27a6	3.07137e-19	-0.868182	0.273	0.628	5.55273e-15	2_uninjured_vs_2_injured_3day		Endoneurial fibroblasts
Mrc22	3.07747e-19	-0.708818	0.089	0.382	5.56376e-15	2_uninjured_vs_2_injured_3day		Endoneurial fibroblasts
Lrrc324	3.30606e-19	-0.702615	0.043	0.288	5.97702e-15	2_uninjured_vs_2_injured_3day		Endoneurial fibroblasts
Efemp24	3.34006e-19	-0.814545	0.227	0.583	6.0385e-15	2_uninjured_vs_2_injured_3day		Endoneurial fibroblasts
Gm61334	3.35124e-19	-0.507745	0.024	0.243	6.05871e-15	2_uninjured_vs_2_injured_3day		Endoneurial fibroblasts
Calm14	3.53573e-19	-0.814165	0.722	0.851	6.39224e-15	2_uninjured_vs_2_injured_3day		Endoneurial fibroblasts
Eif4b3	4.25666e-19	-0.569835	0.086	0.379	7.69562e-15	2_uninjured_vs_2_injured_3day		Endoneurial fibroblasts
Cox5a3	4.5292e-19	-0.755732	0.194	0.54	8.18834e-15	2_uninjured_vs_2_injured_3day		Endoneurial fibroblasts
Fdps	4.98419e-19	1.4376	0.311	0.055	9.01092e-15	2_uninjured_vs_2_injured_3day		Endoneurial fibroblasts
Ace4	5.00426e-19	1.30237	0.385	0.12	9.0472e-15	2_uninjured_vs_2_injured_3day		Endoneurial fibroblasts
Bola23	5.1823e-19	-0.639173	0.11	0.417	9.36909e-15	2_uninjured_vs_2_injured_3day		Endoneurial fibroblasts
Ank3	5.80911e-19	-0.953542	0.057	0.314	1.05023e-14	2_uninjured_vs_2_injured_3day		Endoneurial fibroblasts
Vim5	6.02839e-19	-0.680487	0.88	0.926	1.08987e-14	2_uninjured_vs_2_injured_3day		Endoneurial fibroblasts
Anxa14	6.80485e-19	-0.782953	0.471	0.783	1.23025e-14	2_uninjured_vs_2_injured_3day		Endoneurial fibroblasts
Gm94935	7.09793e-19	-0.523976	0.062	0.33	1.28323e-14	2_uninjured_vs_2_injured_3day		Endoneurial fibroblasts
Pdp1	8.68314e-19	-0.569316	0.055	0.311	1.56983e-14	2_uninjured_vs_2_injured_3day		Endoneurial fibroblasts
Lgr42	9.57541e-19	-0.590281	0.026	0.246	1.73114e-14	2_uninjured_vs_2_injured_3day		Endoneurial fibroblasts
Rps3a36	1.29989e-18	-0.880709	0.435	0.751	2.35007e-14	2_uninjured_vs_2_injured_3day		Endoneurial fibroblasts
Fbn14	1.31576e-18	-0.855861	0.584	0.793	2.37876e-14	2_uninjured_vs_2_injured_3day		Endoneurial fibroblasts
Hnrnpa02	1.42504e-18	-0.687781	0.199	0.547	2.57634e-14	2_uninjured_vs_2_injured_3day		Endoneurial fibroblasts
1110038B12Rik5	1.57895e-18	-0.438873	0.074	0.353	2.85458e-14	2_uninjured_vs_2_injured_3day		Endoneurial fibroblasts
Angptl44	1.61092e-18	-0.754262	0.132	0.45	2.91237e-14	2_uninjured_vs_2_injured_3day		Endoneurial fibroblasts
Rps142	1.749e-18	-0.655037	0.847	0.893	3.16202e-14	2_uninjured_vs_2_injured_3day		Endoneurial fibroblasts
Ccdc88a4	1.84395e-18	-0.835284	0.165	0.489	3.33368e-14	2_uninjured_vs_2_injured_3day		Endoneurial fibroblasts
Emilin1	1.86502e-18	-0.599767	0.048	0.288	3.37177e-14	2_uninjured_vs_2_injured_3day		Endoneurial fibroblasts
Itga54	1.86783e-18	-0.464924	0.038	0.272	3.37685e-14	2_uninjured_vs_2_injured_3day		Endoneurial fibroblasts
Cib12	1.96599e-18	-0.553579	0.074	0.346	3.55432e-14	2_uninjured_vs_2_injured_3day		Endoneurial fibroblasts
Slc20a13	2.12422e-18	-1.08719	0.062	0.314	3.84038e-14	2_uninjured_vs_2_injured_3day		Endoneurial fibroblasts
Minos13	2.38881e-18	-0.904744	0.335	0.696	4.31873e-14	2_uninjured_vs_2_injured_3day		Endoneurial fibroblasts
Tmem2455	2.41958e-18	-0.623902	0.096	0.388	4.37436e-14	2_uninjured_vs_2_injured_3day		Endoneurial fibroblasts
Ppig4	2.88184e-18	-0.668333	0.208	0.563	5.21009e-14	2_uninjured_vs_2_injured_3day		Endoneurial fibroblasts
Phldb12	3.16264e-18	-0.586935	0.134	0.447	5.71774e-14	2_uninjured_vs_2_injured_3day		Endoneurial fibroblasts
Gm103204	3.37379e-18	-0.908573	0.318	0.647	6.09947e-14	2_uninjured_vs_2_injured_3day		Endoneurial fibroblasts
Thbs43	3.43497e-18	-0.803012	0.718	0.864	6.21007e-14	2_uninjured_vs_2_injured_3day		Endoneurial fibroblasts
St8sia22	3.793e-18	-0.647765	0.055	0.301	6.85737e-14	2_uninjured_vs_2_injured_3day		Endoneurial fibroblasts
Phlda35	3.86682e-18	-0.83735	0.129	0.443	6.99082e-14	2_uninjured_vs_2_injured_3day		Endoneurial fibroblasts
Cyb52	3.97838e-18	1.0114	0.687	0.557	7.19251e-14	2_uninjured_vs_2_injured_3day		Endoneurial fibroblasts
Parva4	4.03172e-18	-0.658835	0.098	0.385	7.28895e-14	2_uninjured_vs_2_injured_3day		Endoneurial fibroblasts
Gpr1241	4.03919e-18	-0.563007	0.067	0.327	7.30245e-14	2_uninjured_vs_2_injured_3day		Endoneurial fibroblasts
Ubc5	4.0903e-18	1.27975	0.813	0.783	7.39485e-14	2_uninjured_vs_2_injured_3day		Endoneurial fibroblasts
Furin2	4.45257e-18	-0.672144	0.077	0.35	8.04981e-14	2_uninjured_vs_2_injured_3day		Endoneurial fibroblasts
Gngt25	4.76621e-18	-0.526944	0.053	0.301	8.61683e-14	2_uninjured_vs_2_injured_3day		Endoneurial fibroblasts
Sfxn14	5.37386e-18	-0.473093	0.136	0.463	9.7154e-14	2_uninjured_vs_2_injured_3day		Endoneurial fibroblasts
Rpl316	5.39523e-18	-0.707152	0.206	0.553	9.75403e-14	2_uninjured_vs_2_injured_3day		Endoneurial fibroblasts
Nap1l14	5.60597e-18	-0.680552	0.242	0.592	1.0135e-13	2_uninjured_vs_2_injured_3day		Endoneurial fibroblasts
Steap21	6.07973e-18	-0.402774	0.036	0.262	1.09915e-13	2_uninjured_vs_2_injured_3day		Endoneurial fibroblasts
Ppp1r14b2	6.2071e-18	-0.704381	0.084	0.359	1.12218e-13	2_uninjured_vs_2_injured_3day		Endoneurial fibroblasts
Fam69c	6.35859e-18	-0.499358	0.012	0.201	1.14957e-13	2_uninjured_vs_2_injured_3day		Endoneurial fibroblasts
Specc1	8.30512e-18	-0.407646	0.012	0.201	1.50148e-13	2_uninjured_vs_2_injured_3day		Endoneurial fibroblasts
Limd1	8.39823e-18	-0.741491	0.151	0.466	1.51832e-13	2_uninjured_vs_2_injured_3day		Endoneurial fibroblasts
Lrp62	8.7027e-18	-0.855366	0.225	0.566	1.57336e-13	2_uninjured_vs_2_injured_3day		Endoneurial fibroblasts
Tshz31	9.15077e-18	-0.732656	0.177	0.518	1.65437e-13	2_uninjured_vs_2_injured_3day		Endoneurial fibroblasts
Vasp2	1.10071e-17	-0.670812	0.098	0.382	1.98998e-13	2_uninjured_vs_2_injured_3day		Endoneurial fibroblasts
Cxx1a2	1.38304e-17	-0.873388	0.11	0.388	2.50041e-13	2_uninjured_vs_2_injured_3day		Endoneurial fibroblasts
Ccar13	1.57217e-17	-0.803518	0.225	0.573	2.84233e-13	2_uninjured_vs_2_injured_3day		Endoneurial fibroblasts
Il1rn	1.75399e-17	-0.731659	0	0.162	3.17104e-13	2_uninjured_vs_2_injured_3day		Endoneurial fibroblasts
H6pd	1.76975e-17	-0.700101	0.122	0.424	3.19953e-13	2_uninjured_vs_2_injured_3day		Endoneurial fibroblasts
Gm56114	1.85462e-17	-0.373376	0.014	0.204	3.35297e-13	2_uninjured_vs_2_injured_3day		Endoneurial fibroblasts
Gcg	1.97012e-17	-0.684237	0.029	0.236	3.56178e-13	2_uninjured_vs_2_injured_3day		Endoneurial fibroblasts
Mcam3	2.02564e-17	-0.524655	0.062	0.314	3.66215e-13	2_uninjured_vs_2_injured_3day		Endoneurial fibroblasts
Cltb4	2.04975e-17	-0.650622	0.201	0.54	3.70575e-13	2_uninjured_vs_2_injured_3day		Endoneurial fibroblasts
Cspg5	2.22175e-17	-0.607714	0.022	0.22	4.0167e-13	2_uninjured_vs_2_injured_3day		Endoneurial fibroblasts
Cdk11b2	2.27406e-17	-0.616276	0.182	0.511	4.11128e-13	2_uninjured_vs_2_injured_3day		Endoneurial fibroblasts
Wdr14	2.53127e-17	-0.483717	0.079	0.35	4.57629e-13	2_uninjured_vs_2_injured_3day		Endoneurial fibroblasts
Tmem22	2.84655e-17	-0.549673	0.014	0.201	5.14628e-13	2_uninjured_vs_2_injured_3day		Endoneurial fibroblasts
Basp12	2.86816e-17	-0.675593	0.048	0.278	5.18535e-13	2_uninjured_vs_2_injured_3day		Endoneurial fibroblasts
Cdkn1c5	3.46988e-17	1.3834	0.333	0.081	6.2732e-13	2_uninjured_vs_2_injured_3day		Endoneurial fibroblasts
Psmc13	3.52778e-17	-0.708554	0.179	0.515	6.37787e-13	2_uninjured_vs_2_injured_3day		Endoneurial fibroblasts
Lsm43	3.55778e-17	-0.448407	0.1	0.392	6.43211e-13	2_uninjured_vs_2_injured_3day		Endoneurial fibroblasts
Timm8b2	4.18236e-17	-0.487042	0.129	0.434	7.56128e-13	2_uninjured_vs_2_injured_3day		Endoneurial fibroblasts
Ubl4	4.772e-17	-0.545024	0.065	0.314	8.62729e-13	2_uninjured_vs_2_injured_3day		Endoneurial fibroblasts
Mrpl522	4.97232e-17	-0.779298	0.294	0.621	8.98945e-13	2_uninjured_vs_2_injured_3day		Endoneurial fibroblasts
Purb4	5.30232e-17	-0.713413	0.153	0.466	9.58606e-13	2_uninjured_vs_2_injured_3day		Endoneurial fibroblasts
Slc25a54	5.35743e-17	-0.951251	0.285	0.592	9.6857e-13	2_uninjured_vs_2_injured_3day		Endoneurial fibroblasts
Gm100365	5.56353e-17	-0.70696	0.077	0.337	1.00583e-12	2_uninjured_vs_2_injured_3day		Endoneurial fibroblasts
Pxn1	6.37269e-17	-0.488712	0.093	0.375	1.15212e-12	2_uninjured_vs_2_injured_3day		Endoneurial fibroblasts
Efnb13	6.87069e-17	-0.616181	0.141	0.443	1.24215e-12	2_uninjured_vs_2_injured_3day		Endoneurial fibroblasts
Rpl36-ps35	7.16286e-17	-0.680321	0.17	0.495	1.29497e-12	2_uninjured_vs_2_injured_3day		Endoneurial fibroblasts
Anp32b3	7.56414e-17	-0.811914	0.22	0.55	1.36752e-12	2_uninjured_vs_2_injured_3day		Endoneurial fibroblasts
Tpm23	7.96682e-17	-0.550402	0.1	0.382	1.44032e-12	2_uninjured_vs_2_injured_3day		Endoneurial fibroblasts
Eif3a2	8.36739e-17	-0.774407	0.309	0.673	1.51274e-12	2_uninjured_vs_2_injured_3day		Endoneurial fibroblasts
Eif12	8.8413e-17	0.78001	0.809	0.731	1.59842e-12	2_uninjured_vs_2_injured_3day		Endoneurial fibroblasts
Sf3b32	8.98838e-17	-0.716725	0.057	0.294	1.62501e-12	2_uninjured_vs_2_injured_3day		Endoneurial fibroblasts
Cops62	9.12698e-17	-0.55348	0.122	0.417	1.65007e-12	2_uninjured_vs_2_injured_3day		Endoneurial fibroblasts
Casp44	9.25696e-17	-0.664414	0.156	0.463	1.67357e-12	2_uninjured_vs_2_injured_3day		Endoneurial fibroblasts
Abcf1	9.43482e-17	-0.434046	0.158	0.479	1.70572e-12	2_uninjured_vs_2_injured_3day		Endoneurial fibroblasts
Uggt14	1.01515e-16	-0.596793	0.033	0.243	1.83529e-12	2_uninjured_vs_2_injured_3day		Endoneurial fibroblasts
Nudcd24	1.02953e-16	-0.631304	0.108	0.388	1.86129e-12	2_uninjured_vs_2_injured_3day		Endoneurial fibroblasts
2700094K13Rik5	1.09466e-16	-0.718621	0.053	0.278	1.97903e-12	2_uninjured_vs_2_injured_3day		Endoneurial fibroblasts
Ltbr2	1.11669e-16	-0.489749	0.093	0.369	2.01886e-12	2_uninjured_vs_2_injured_3day		Endoneurial fibroblasts
Pigt	1.16597e-16	-0.520056	0.05	0.282	2.10796e-12	2_uninjured_vs_2_injured_3day		Endoneurial fibroblasts
Lrp4	1.19124e-16	-0.334174	0.053	0.288	2.15364e-12	2_uninjured_vs_2_injured_3day		Endoneurial fibroblasts
H2-D14	1.202e-16	0.910034	0.739	0.638	2.1731e-12	2_uninjured_vs_2_injured_3day		Endoneurial fibroblasts
Efhd21	1.38459e-16	-0.541399	0.029	0.23	2.5032e-12	2_uninjured_vs_2_injured_3day		Endoneurial fibroblasts
Rpl82	1.4273e-16	-0.706768	0.706	0.828	2.58041e-12	2_uninjured_vs_2_injured_3day		Endoneurial fibroblasts
Sorcs22	1.4825e-16	-0.45299	0.072	0.32	2.68022e-12	2_uninjured_vs_2_injured_3day		Endoneurial fibroblasts
Atp8b14	1.49386e-16	-0.544987	0.194	0.524	2.70075e-12	2_uninjured_vs_2_injured_3day		Endoneurial fibroblasts
Rpl306	1.55972e-16	-0.735321	0.311	0.641	2.81983e-12	2_uninjured_vs_2_injured_3day		Endoneurial fibroblasts
Pmepa15	1.5825e-16	-0.487512	0.014	0.194	2.861e-12	2_uninjured_vs_2_injured_3day		Endoneurial fibroblasts
Tpbg	1.60253e-16	-0.449847	0.045	0.269	2.89721e-12	2_uninjured_vs_2_injured_3day		Endoneurial fibroblasts
Cxcl5	1.62672e-16	-0.534494	0.007	0.175	2.94095e-12	2_uninjured_vs_2_injured_3day		Endoneurial fibroblasts
Pafah1b22	1.73478e-16	-0.708449	0.081	0.333	3.13632e-12	2_uninjured_vs_2_injured_3day		Endoneurial fibroblasts
Ap1s13	1.77081e-16	-0.5529	0.098	0.372	3.20145e-12	2_uninjured_vs_2_injured_3day		Endoneurial fibroblasts
Lepre13	1.78298e-16	-0.546219	0.127	0.427	3.22345e-12	2_uninjured_vs_2_injured_3day		Endoneurial fibroblasts
Gm52774	1.87798e-16	-0.333777	0.019	0.207	3.3952e-12	2_uninjured_vs_2_injured_3day		Endoneurial fibroblasts
Chsy11	1.95666e-16	-0.692531	0.089	0.343	3.53745e-12	2_uninjured_vs_2_injured_3day		Endoneurial fibroblasts
Slc30a42	2.09841e-16	-0.585377	0.041	0.256	3.79371e-12	2_uninjured_vs_2_injured_3day		Endoneurial fibroblasts
Copa4	2.11444e-16	-0.620243	0.189	0.521	3.82269e-12	2_uninjured_vs_2_injured_3day		Endoneurial fibroblasts
Cul72	2.15602e-16	-0.515501	0.055	0.288	3.89787e-12	2_uninjured_vs_2_injured_3day		Endoneurial fibroblasts
2700060E02Rik4	2.22736e-16	-0.701154	0.203	0.534	4.02685e-12	2_uninjured_vs_2_injured_3day		Endoneurial fibroblasts
Dhcr24	2.25239e-16	1.00282	0.22	0.013	4.0721e-12	2_uninjured_vs_2_injured_3day		Endoneurial fibroblasts
Aebp13	2.40661e-16	-0.583654	0.861	0.909	4.35092e-12	2_uninjured_vs_2_injured_3day		Endoneurial fibroblasts
Rps124	2.56562e-16	-0.434556	0.093	0.366	4.63838e-12	2_uninjured_vs_2_injured_3day		Endoneurial fibroblasts
Tnfrsf23	2.62451e-16	-0.393598	0.005	0.165	4.74484e-12	2_uninjured_vs_2_injured_3day		Endoneurial fibroblasts
Rras21	2.72896e-16	-0.477646	0.014	0.191	4.93368e-12	2_uninjured_vs_2_injured_3day		Endoneurial fibroblasts
Akr1b81	2.76244e-16	-0.392545	0.077	0.333	4.99422e-12	2_uninjured_vs_2_injured_3day		Endoneurial fibroblasts
Upp13	2.80306e-16	-0.551131	0.005	0.165	5.06765e-12	2_uninjured_vs_2_injured_3day		Endoneurial fibroblasts
Tsc22d33	2.89999e-16	1.57749	0.426	0.181	5.24289e-12	2_uninjured_vs_2_injured_3day		Endoneurial fibroblasts
Tpm3-rs76	2.94892e-16	-0.834087	0.222	0.54	5.33136e-12	2_uninjured_vs_2_injured_3day		Endoneurial fibroblasts
App2	3.25022e-16	0.572206	0.888	0.854	5.87606e-12	2_uninjured_vs_2_injured_3day		Endoneurial fibroblasts
Flnb4	3.3041e-16	-0.481849	0.05	0.275	5.97348e-12	2_uninjured_vs_2_injured_3day		Endoneurial fibroblasts
Cd746	3.43754e-16	-0.493401	0.01	0.178	6.21472e-12	2_uninjured_vs_2_injured_3day		Endoneurial fibroblasts
Gm82254	3.5549e-16	-0.466603	0.024	0.217	6.42691e-12	2_uninjured_vs_2_injured_3day		Endoneurial fibroblasts
Rpl45	3.71358e-16	-0.681665	0.756	0.877	6.71379e-12	2_uninjured_vs_2_injured_3day		Endoneurial fibroblasts
Tubb2b3	3.75301e-16	-0.473645	0.045	0.262	6.78506e-12	2_uninjured_vs_2_injured_3day		Endoneurial fibroblasts
Panx11	3.99795e-16	-0.344008	0	0.149	7.2279e-12	2_uninjured_vs_2_injured_3day		Endoneurial fibroblasts
Taf102	4.2894e-16	-0.28736	0.041	0.256	7.75481e-12	2_uninjured_vs_2_injured_3day		Endoneurial fibroblasts
Vcan6	4.33613e-16	-0.660131	0.385	0.702	7.8393e-12	2_uninjured_vs_2_injured_3day		Endoneurial fibroblasts
Nmt13	4.41226e-16	-0.603508	0.098	0.369	7.97692e-12	2_uninjured_vs_2_injured_3day		Endoneurial fibroblasts
Ugdh3	4.48818e-16	-0.61082	0.203	0.534	8.11419e-12	2_uninjured_vs_2_injured_3day		Endoneurial fibroblasts
Cttn2	4.70004e-16	-0.57809	0.127	0.411	8.4972e-12	2_uninjured_vs_2_injured_3day		Endoneurial fibroblasts
Gm51605	4.82122e-16	-0.583226	0.108	0.385	8.71628e-12	2_uninjured_vs_2_injured_3day		Endoneurial fibroblasts
Fxyd12	4.91498e-16	1.12718	0.648	0.528	8.88579e-12	2_uninjured_vs_2_injured_3day		Endoneurial fibroblasts
Rpl35a5	5.42006e-16	-0.931632	0.282	0.599	9.79893e-12	2_uninjured_vs_2_injured_3day		Endoneurial fibroblasts
Tanc1	6.28744e-16	-0.588219	0.043	0.256	1.13671e-11	2_uninjured_vs_2_injured_3day		Endoneurial fibroblasts
Cdr2l2	6.4783e-16	-0.424168	0.108	0.382	1.17121e-11	2_uninjured_vs_2_injured_3day		Endoneurial fibroblasts
Postn5	6.55084e-16	-0.921916	0.211	0.534	1.18433e-11	2_uninjured_vs_2_injured_3day		Endoneurial fibroblasts
Rcc2	6.60888e-16	-0.381341	0.043	0.259	1.19482e-11	2_uninjured_vs_2_injured_3day		Endoneurial fibroblasts
Dync1i21	6.63619e-16	-0.623541	0.299	0.65	1.19976e-11	2_uninjured_vs_2_injured_3day		Endoneurial fibroblasts
Cdh113	6.98571e-16	-0.647619	0.038	0.243	1.26295e-11	2_uninjured_vs_2_injured_3day		Endoneurial fibroblasts
Tead23	7.37261e-16	-0.3647	0.017	0.194	1.33289e-11	2_uninjured_vs_2_injured_3day		Endoneurial fibroblasts
Myeov22	7.51862e-16	-0.686358	0.299	0.647	1.35929e-11	2_uninjured_vs_2_injured_3day		Endoneurial fibroblasts
Gspt13	7.74313e-16	-0.545851	0.134	0.427	1.39988e-11	2_uninjured_vs_2_injured_3day		Endoneurial fibroblasts
Pbx11	7.95802e-16	-0.678018	0.16	0.456	1.43873e-11	2_uninjured_vs_2_injured_3day		Endoneurial fibroblasts
Prelid14	8.10717e-16	-0.587676	0.165	0.472	1.46569e-11	2_uninjured_vs_2_injured_3day		Endoneurial fibroblasts
Ift74	8.59769e-16	-0.557024	0.108	0.385	1.55438e-11	2_uninjured_vs_2_injured_3day		Endoneurial fibroblasts
Ctss1	8.69413e-16	-0.426501	0	0.146	1.57181e-11	2_uninjured_vs_2_injured_3day		Endoneurial fibroblasts
Glrx54	8.81909e-16	-0.693732	0.132	0.417	1.5944e-11	2_uninjured_vs_2_injured_3day		Endoneurial fibroblasts
Map4	9.02342e-16	-0.425935	0.127	0.424	1.63134e-11	2_uninjured_vs_2_injured_3day		Endoneurial fibroblasts
Gm255954	9.14192e-16	-0.271602	0.01	0.175	1.65277e-11	2_uninjured_vs_2_injured_3day		Endoneurial fibroblasts
Btg26	9.67146e-16	1.5682	0.624	0.456	1.7485e-11	2_uninjured_vs_2_injured_3day		Endoneurial fibroblasts
Znrf12	1.09194e-15	-0.662974	0.026	0.214	1.97411e-11	2_uninjured_vs_2_injured_3day		Endoneurial fibroblasts
Stk32b	1.10897e-15	-0.375639	0.002	0.152	2.0049e-11	2_uninjured_vs_2_injured_3day		Endoneurial fibroblasts
Trappc11	1.13499e-15	-0.597972	0.081	0.327	2.05195e-11	2_uninjured_vs_2_injured_3day		Endoneurial fibroblasts
2410015M20Rik2	1.17474e-15	-0.601869	0.167	0.485	2.12382e-11	2_uninjured_vs_2_injured_3day		Endoneurial fibroblasts
Csrp24	1.2101e-15	-0.409794	0.024	0.21	2.18774e-11	2_uninjured_vs_2_injured_3day		Endoneurial fibroblasts
Slirp1	1.23351e-15	-0.518938	0.153	0.453	2.23005e-11	2_uninjured_vs_2_injured_3day		Endoneurial fibroblasts
Ssu722	1.29125e-15	-0.679221	0.108	0.372	2.33445e-11	2_uninjured_vs_2_injured_3day		Endoneurial fibroblasts
Rab134	1.31642e-15	-0.662965	0.079	0.324	2.37995e-11	2_uninjured_vs_2_injured_3day		Endoneurial fibroblasts
Vps36	1.32307e-15	-0.471341	0.134	0.421	2.39198e-11	2_uninjured_vs_2_injured_3day		Endoneurial fibroblasts
Hlf3	1.33207e-15	1.32724	0.313	0.084	2.40825e-11	2_uninjured_vs_2_injured_3day		Endoneurial fibroblasts
Stat5a1	1.47271e-15	-0.652885	0.053	0.272	2.66252e-11	2_uninjured_vs_2_injured_3day		Endoneurial fibroblasts
Mical23	1.49114e-15	-0.392389	0.005	0.159	2.69583e-11	2_uninjured_vs_2_injured_3day		Endoneurial fibroblasts
Entpd23	1.60371e-15	1.01787	0.711	0.595	2.89936e-11	2_uninjured_vs_2_injured_3day		Endoneurial fibroblasts
C230081A13Rik2	1.62582e-15	-0.432364	0.134	0.427	2.93931e-11	2_uninjured_vs_2_injured_3day		Endoneurial fibroblasts
Ldlr2	1.68113e-15	1.06251	0.227	0.023	3.03932e-11	2_uninjured_vs_2_injured_3day		Endoneurial fibroblasts
Pdap15	1.6851e-15	-0.768466	0.344	0.68	3.04649e-11	2_uninjured_vs_2_injured_3day		Endoneurial fibroblasts
Cldn12	1.79344e-15	-0.43979	0.014	0.184	3.24236e-11	2_uninjured_vs_2_injured_3day		Endoneurial fibroblasts
Efnb24	1.80441e-15	-0.506895	0.11	0.382	3.26218e-11	2_uninjured_vs_2_injured_3day		Endoneurial fibroblasts
Rps4x5	1.85183e-15	-0.847265	0.562	0.757	3.34793e-11	2_uninjured_vs_2_injured_3day		Endoneurial fibroblasts
Nhp24	1.85351e-15	-0.485892	0.089	0.34	3.35096e-11	2_uninjured_vs_2_injured_3day		Endoneurial fibroblasts
Kif5b3	1.94251e-15	-0.662785	0.311	0.654	3.51186e-11	2_uninjured_vs_2_injured_3day		Endoneurial fibroblasts
Wdr264	2.09757e-15	-0.501049	0.17	0.479	3.79219e-11	2_uninjured_vs_2_injured_3day		Endoneurial fibroblasts
Sec23a2	2.13231e-15	-0.390716	0.1	0.369	3.855e-11	2_uninjured_vs_2_injured_3day		Endoneurial fibroblasts
Oraov1	2.18699e-15	-0.648265	0.043	0.249	3.95386e-11	2_uninjured_vs_2_injured_3day		Endoneurial fibroblasts
Dcakd1	2.31664e-15	-0.285413	0.05	0.269	4.18825e-11	2_uninjured_vs_2_injured_3day		Endoneurial fibroblasts
Map4k4	2.42843e-15	-0.664141	0.258	0.589	4.39037e-11	2_uninjured_vs_2_injured_3day		Endoneurial fibroblasts
Pgls4	2.52103e-15	-0.371279	0.12	0.405	4.55777e-11	2_uninjured_vs_2_injured_3day		Endoneurial fibroblasts
Pld31	2.5584e-15	-0.580472	0.148	0.447	4.62532e-11	2_uninjured_vs_2_injured_3day		Endoneurial fibroblasts
Adam171	2.65052e-15	-0.422017	0.067	0.298	4.79187e-11	2_uninjured_vs_2_injured_3day		Endoneurial fibroblasts
Colgalt13	2.7026e-15	-0.51687	0.175	0.495	4.88604e-11	2_uninjured_vs_2_injured_3day		Endoneurial fibroblasts
Angpt12	3.11808e-15	-0.468275	0.005	0.155	5.63718e-11	2_uninjured_vs_2_injured_3day		Endoneurial fibroblasts
Heg16	3.2024e-15	-0.586445	0.124	0.405	5.78962e-11	2_uninjured_vs_2_injured_3day		Endoneurial fibroblasts
Wipi14	3.52805e-15	-0.531128	0.215	0.54	6.37836e-11	2_uninjured_vs_2_injured_3day		Endoneurial fibroblasts
Igsf32	3.56295e-15	-0.585663	0.16	0.456	6.44147e-11	2_uninjured_vs_2_injured_3day		Endoneurial fibroblasts
Gm230614	3.57227e-15	-0.540103	0.012	0.175	6.45831e-11	2_uninjured_vs_2_injured_3day		Endoneurial fibroblasts
Abca8a4	3.69093e-15	0.774658	0.797	0.676	6.67283e-11	2_uninjured_vs_2_injured_3day		Endoneurial fibroblasts
Has2	3.80942e-15	-0.710868	0.103	0.356	6.88705e-11	2_uninjured_vs_2_injured_3day		Endoneurial fibroblasts
Mgat4b2	3.83563e-15	-0.409303	0.048	0.259	6.93443e-11	2_uninjured_vs_2_injured_3day		Endoneurial fibroblasts
Myh93	3.93487e-15	-0.70608	0.182	0.492	7.11386e-11	2_uninjured_vs_2_injured_3day		Endoneurial fibroblasts
Arhgap13	4.13706e-15	-0.594663	0.041	0.243	7.47939e-11	2_uninjured_vs_2_injured_3day		Endoneurial fibroblasts
Fbln52	4.34846e-15	-0.359116	0.057	0.282	7.86159e-11	2_uninjured_vs_2_injured_3day		Endoneurial fibroblasts
Commd33	4.50751e-15	-0.548052	0.122	0.395	8.14913e-11	2_uninjured_vs_2_injured_3day		Endoneurial fibroblasts
Cpq1	5.38402e-15	1.13489	0.459	0.246	9.73376e-11	2_uninjured_vs_2_injured_3day		Endoneurial fibroblasts
Chid1	5.48989e-15	-0.427867	0.06	0.285	9.92517e-11	2_uninjured_vs_2_injured_3day		Endoneurial fibroblasts
Yap14	5.87879e-15	-0.30726	0.053	0.269	1.06283e-10	2_uninjured_vs_2_injured_3day		Endoneurial fibroblasts
Clic13	5.97012e-15	-0.645313	0.323	0.67	1.07934e-10	2_uninjured_vs_2_injured_3day		Endoneurial fibroblasts
Rbms12	6.15429e-15	-0.777697	0.337	0.673	1.11263e-10	2_uninjured_vs_2_injured_3day		Endoneurial fibroblasts
Rpl114	6.24905e-15	-0.736047	0.285	0.589	1.12977e-10	2_uninjured_vs_2_injured_3day		Endoneurial fibroblasts
Rps285	6.42954e-15	-0.803538	0.438	0.722	1.1624e-10	2_uninjured_vs_2_injured_3day		Endoneurial fibroblasts
Knop14	6.44274e-15	-0.447179	0.11	0.382	1.16478e-10	2_uninjured_vs_2_injured_3day		Endoneurial fibroblasts
Pfkl	6.48351e-15	-0.464952	0.014	0.178	1.17215e-10	2_uninjured_vs_2_injured_3day		Endoneurial fibroblasts
Golph31	6.61758e-15	-0.54535	0.144	0.43	1.19639e-10	2_uninjured_vs_2_injured_3day		Endoneurial fibroblasts
Capzb2	6.64573e-15	-0.375514	0.222	0.56	1.20148e-10	2_uninjured_vs_2_injured_3day		Endoneurial fibroblasts
Cox7b6	7.63797e-15	-0.81725	0.428	0.709	1.38087e-10	2_uninjured_vs_2_injured_3day		Endoneurial fibroblasts
Timm10b2	7.88739e-15	-0.517118	0.175	0.485	1.42596e-10	2_uninjured_vs_2_injured_3day		Endoneurial fibroblasts
Rps175	8.2626e-15	-0.763792	0.103	0.359	1.4938e-10	2_uninjured_vs_2_injured_3day		Endoneurial fibroblasts
Gfra1	8.99191e-15	1.41628	0.481	0.294	1.62565e-10	2_uninjured_vs_2_injured_3day		Endoneurial fibroblasts
2010107E04Rik4	9.02359e-15	-0.731267	0.373	0.663	1.63138e-10	2_uninjured_vs_2_injured_3day		Endoneurial fibroblasts
Gm98434	9.07329e-15	-0.726855	0.565	0.767	1.64036e-10	2_uninjured_vs_2_injured_3day		Endoneurial fibroblasts
Atp8b2	9.23084e-15	-0.305356	0.057	0.278	1.66884e-10	2_uninjured_vs_2_injured_3day		Endoneurial fibroblasts
Pum11	9.47853e-15	-0.600502	0.129	0.405	1.71362e-10	2_uninjured_vs_2_injured_3day		Endoneurial fibroblasts
Epdr12	9.91977e-15	-0.447179	0.024	0.201	1.79339e-10	2_uninjured_vs_2_injured_3day		Endoneurial fibroblasts
Pdcd6ip	1.1323e-14	-0.480676	0.139	0.424	2.04708e-10	2_uninjured_vs_2_injured_3day		Endoneurial fibroblasts
Arl4c3	1.18443e-14	-0.489361	0.002	0.142	2.14133e-10	2_uninjured_vs_2_injured_3day		Endoneurial fibroblasts
Ywhab1	1.23228e-14	-0.717048	0.373	0.709	2.22784e-10	2_uninjured_vs_2_injured_3day		Endoneurial fibroblasts
Metrnl2	1.23789e-14	-0.482268	0.074	0.301	2.23798e-10	2_uninjured_vs_2_injured_3day		Endoneurial fibroblasts
Gnb12	1.27178e-14	-0.653159	0.261	0.592	2.29925e-10	2_uninjured_vs_2_injured_3day		Endoneurial fibroblasts
Slc16a32	1.38262e-14	-0.446122	0.005	0.149	2.49964e-10	2_uninjured_vs_2_injured_3day		Endoneurial fibroblasts
St6gal11	1.38734e-14	-0.441506	0.062	0.285	2.50818e-10	2_uninjured_vs_2_injured_3day		Endoneurial fibroblasts
Ssrp14	1.44166e-14	-0.733381	0.148	0.427	2.60638e-10	2_uninjured_vs_2_injured_3day		Endoneurial fibroblasts
Dlg3	1.44848e-14	-0.507226	0.029	0.21	2.61871e-10	2_uninjured_vs_2_injured_3day		Endoneurial fibroblasts
2200002D01Rik3	1.47575e-14	-0.500642	0.012	0.168	2.668e-10	2_uninjured_vs_2_injured_3day		Endoneurial fibroblasts
Cndp22	1.5407e-14	-0.602181	0.086	0.327	2.78543e-10	2_uninjured_vs_2_injured_3day		Endoneurial fibroblasts
Adss4	1.59518e-14	-0.353417	0.06	0.282	2.88392e-10	2_uninjured_vs_2_injured_3day		Endoneurial fibroblasts
Smc45	1.62145e-14	-0.696679	0.127	0.392	2.93142e-10	2_uninjured_vs_2_injured_3day		Endoneurial fibroblasts
Klf45	1.6527e-14	1.49016	0.589	0.424	2.98791e-10	2_uninjured_vs_2_injured_3day		Endoneurial fibroblasts
Foxd2	1.65538e-14	-0.496792	0.048	0.252	2.99276e-10	2_uninjured_vs_2_injured_3day		Endoneurial fibroblasts
Tnpo13	1.66502e-14	-0.396428	0.055	0.265	3.01019e-10	2_uninjured_vs_2_injured_3day		Endoneurial fibroblasts
Cyp51	1.71336e-14	1.14148	0.282	0.068	3.09758e-10	2_uninjured_vs_2_injured_3day		Endoneurial fibroblasts
Dap4	1.78359e-14	-0.86003	0.311	0.628	3.22456e-10	2_uninjured_vs_2_injured_3day		Endoneurial fibroblasts
Syne13	1.86008e-14	-0.521431	0.053	0.259	3.36284e-10	2_uninjured_vs_2_injured_3day		Endoneurial fibroblasts
Birc54	1.90865e-14	-0.687922	0	0.133	3.45065e-10	2_uninjured_vs_2_injured_3day		Endoneurial fibroblasts
Fcgrt4	2.00007e-14	1.2256	0.543	0.388	3.61593e-10	2_uninjured_vs_2_injured_3day		Endoneurial fibroblasts
Nudt34	2.01553e-14	-0.47973	0.067	0.291	3.64387e-10	2_uninjured_vs_2_injured_3day		Endoneurial fibroblasts
Mdh22	2.06479e-14	-0.549512	0.203	0.515	3.73293e-10	2_uninjured_vs_2_injured_3day		Endoneurial fibroblasts
Nrp13	2.06553e-14	-0.759101	0.251	0.566	3.73427e-10	2_uninjured_vs_2_injured_3day		Endoneurial fibroblasts
Bmp7	2.08661e-14	-0.461713	0.12	0.388	3.77239e-10	2_uninjured_vs_2_injured_3day		Endoneurial fibroblasts
Pcbp4	2.30726e-14	-0.403536	0.086	0.333	4.17129e-10	2_uninjured_vs_2_injured_3day		Endoneurial fibroblasts
Tspan11	2.33938e-14	-0.384042	0.002	0.139	4.22937e-10	2_uninjured_vs_2_injured_3day		Endoneurial fibroblasts
Mtch21	2.38981e-14	-0.512318	0.172	0.469	4.32054e-10	2_uninjured_vs_2_injured_3day		Endoneurial fibroblasts
Gm50773	2.40559e-14	1.15544	0.469	0.256	4.34907e-10	2_uninjured_vs_2_injured_3day		Endoneurial fibroblasts
Nek62	2.49922e-14	-0.363849	0.045	0.246	4.51834e-10	2_uninjured_vs_2_injured_3day		Endoneurial fibroblasts
Ctps4	2.52429e-14	-0.29726	0.026	0.204	4.56367e-10	2_uninjured_vs_2_injured_3day		Endoneurial fibroblasts
Arpc22	2.70879e-14	-0.717556	0.438	0.738	4.89723e-10	2_uninjured_vs_2_injured_3day		Endoneurial fibroblasts
Calu2	2.74203e-14	-0.673928	0.49	0.78	4.95731e-10	2_uninjured_vs_2_injured_3day		Endoneurial fibroblasts
Top13	2.79123e-14	-0.627214	0.309	0.641	5.04626e-10	2_uninjured_vs_2_injured_3day		Endoneurial fibroblasts
Ifi302	2.82409e-14	1.31215	0.447	0.239	5.10567e-10	2_uninjured_vs_2_injured_3day		Endoneurial fibroblasts
Cyp26b12	2.94452e-14	-0.833056	0.091	0.327	5.3234e-10	2_uninjured_vs_2_injured_3day		Endoneurial fibroblasts
Rnf1252	3.11493e-14	-0.53345	0.017	0.178	5.63148e-10	2_uninjured_vs_2_injured_3day		Endoneurial fibroblasts
Atp11a	3.25258e-14	-0.598624	0.043	0.239	5.88034e-10	2_uninjured_vs_2_injured_3day		Endoneurial fibroblasts
Cox4i14	3.277e-14	-0.647509	0.658	0.822	5.92449e-10	2_uninjured_vs_2_injured_3day		Endoneurial fibroblasts
Col16a13	3.30063e-14	-0.756312	0.289	0.618	5.96722e-10	2_uninjured_vs_2_injured_3day		Endoneurial fibroblasts
Slc44a12	3.37948e-14	-0.535526	0.191	0.489	6.10977e-10	2_uninjured_vs_2_injured_3day		Endoneurial fibroblasts
Alpl	3.40849e-14	-0.536872	0.079	0.307	6.16221e-10	2_uninjured_vs_2_injured_3day		Endoneurial fibroblasts
Set2	3.72847e-14	-0.48192	0.151	0.44	6.7407e-10	2_uninjured_vs_2_injured_3day		Endoneurial fibroblasts
Ubr5	4.11972e-14	-0.454191	0.081	0.317	7.44803e-10	2_uninjured_vs_2_injured_3day		Endoneurial fibroblasts
Pfdn12	4.40556e-14	-0.370623	0.12	0.392	7.96481e-10	2_uninjured_vs_2_injured_3day		Endoneurial fibroblasts
Pi4ka1	4.54144e-14	-0.397637	0.022	0.188	8.21047e-10	2_uninjured_vs_2_injured_3day		Endoneurial fibroblasts
Cltc2	4.6891e-14	-0.541922	0.232	0.553	8.47742e-10	2_uninjured_vs_2_injured_3day		Endoneurial fibroblasts
Polr2m2	4.83943e-14	-0.590773	0.153	0.44	8.74921e-10	2_uninjured_vs_2_injured_3day		Endoneurial fibroblasts
Gtf3c62	4.87612e-14	-0.509933	0.105	0.353	8.81553e-10	2_uninjured_vs_2_injured_3day		Endoneurial fibroblasts
Serp14	4.88022e-14	-0.702093	0.246	0.563	8.82294e-10	2_uninjured_vs_2_injured_3day		Endoneurial fibroblasts
Rnf42	5.23633e-14	-0.551268	0.053	0.256	9.46676e-10	2_uninjured_vs_2_injured_3day		Endoneurial fibroblasts
Rpl28-ps42	5.60089e-14	-0.314323	0.002	0.136	1.01259e-09	2_uninjured_vs_2_injured_3day		Endoneurial fibroblasts
mt-Nd54	5.70966e-14	0.910274	0.694	0.557	1.03225e-09	2_uninjured_vs_2_injured_3day		Endoneurial fibroblasts
Plac82	5.83592e-14	-0.497169	0.014	0.168	1.05508e-09	2_uninjured_vs_2_injured_3day		Endoneurial fibroblasts
Hdlbp4	5.97489e-14	-0.766638	0.335	0.67	1.0802e-09	2_uninjured_vs_2_injured_3day		Endoneurial fibroblasts
Phc22	6.20336e-14	-0.336516	0.05	0.252	1.1215e-09	2_uninjured_vs_2_injured_3day		Endoneurial fibroblasts
Ralgds2	6.21588e-14	-0.48462	0.084	0.317	1.12377e-09	2_uninjured_vs_2_injured_3day		Endoneurial fibroblasts
Setd84	6.4878e-14	-0.431842	0.041	0.23	1.17293e-09	2_uninjured_vs_2_injured_3day		Endoneurial fibroblasts
Atf5	6.64362e-14	1.36011	0.445	0.246	1.2011e-09	2_uninjured_vs_2_injured_3day		Endoneurial fibroblasts
Cct42	6.76674e-14	-0.562918	0.127	0.392	1.22336e-09	2_uninjured_vs_2_injured_3day		Endoneurial fibroblasts
Bax	6.82934e-14	-0.341989	0.136	0.417	1.23468e-09	2_uninjured_vs_2_injured_3day		Endoneurial fibroblasts
Mfsd5	7.23561e-14	-0.391245	0.055	0.259	1.30813e-09	2_uninjured_vs_2_injured_3day		Endoneurial fibroblasts
Ubtd1	7.33416e-14	-0.400677	0.017	0.175	1.32594e-09	2_uninjured_vs_2_injured_3day		Endoneurial fibroblasts
Ppp2cb2	7.6003e-14	-0.50263	0.069	0.285	1.37406e-09	2_uninjured_vs_2_injured_3day		Endoneurial fibroblasts
Fam162a2	7.63654e-14	-0.674849	0.163	0.44	1.38061e-09	2_uninjured_vs_2_injured_3day		Endoneurial fibroblasts
Larp72	7.65046e-14	-0.391134	0.081	0.314	1.38313e-09	2_uninjured_vs_2_injured_3day		Endoneurial fibroblasts
Gpnmb1	7.66377e-14	-0.337816	0.01	0.155	1.38553e-09	2_uninjured_vs_2_injured_3day		Endoneurial fibroblasts
H2-Ab15	7.80485e-14	-0.497065	0.01	0.155	1.41104e-09	2_uninjured_vs_2_injured_3day		Endoneurial fibroblasts
Man1a4	7.91421e-14	-0.360769	0.141	0.414	1.43081e-09	2_uninjured_vs_2_injured_3day		Endoneurial fibroblasts
Gm102212	8.26118e-14	-0.281196	0.029	0.204	1.49354e-09	2_uninjured_vs_2_injured_3day		Endoneurial fibroblasts
Cstb3	8.51092e-14	-0.769852	0.347	0.647	1.53869e-09	2_uninjured_vs_2_injured_3day		Endoneurial fibroblasts
Qsox13	8.54594e-14	-0.501544	0.132	0.398	1.54502e-09	2_uninjured_vs_2_injured_3day		Endoneurial fibroblasts
Pbdc14	8.55046e-14	-0.40133	0.115	0.375	1.54584e-09	2_uninjured_vs_2_injured_3day		Endoneurial fibroblasts
Atp13a34	8.63092e-14	-0.372539	0.045	0.239	1.56038e-09	2_uninjured_vs_2_injured_3day		Endoneurial fibroblasts
Hnrnpa11	8.63273e-14	-0.287269	0.012	0.162	1.56071e-09	2_uninjured_vs_2_injured_3day		Endoneurial fibroblasts
Ssr34	8.66878e-14	-0.747611	0.419	0.712	1.56723e-09	2_uninjured_vs_2_injured_3day		Endoneurial fibroblasts
Mcfd22	8.68853e-14	-0.343728	0.153	0.44	1.5708e-09	2_uninjured_vs_2_injured_3day		Endoneurial fibroblasts
Deb12	8.75853e-14	-0.482336	0.103	0.353	1.58345e-09	2_uninjured_vs_2_injured_3day		Endoneurial fibroblasts
Ran3	8.9916e-14	-0.510843	0.184	0.476	1.62559e-09	2_uninjured_vs_2_injured_3day		Endoneurial fibroblasts
Atpif15	9.19097e-14	-0.684967	0.404	0.728	1.66164e-09	2_uninjured_vs_2_injured_3day		Endoneurial fibroblasts
Gm64726	9.2182e-14	-0.73244	0.337	0.634	1.66656e-09	2_uninjured_vs_2_injured_3day		Endoneurial fibroblasts
Pros14	9.49088e-14	-0.599319	0.309	0.641	1.71586e-09	2_uninjured_vs_2_injured_3day		Endoneurial fibroblasts
Il13ra11	9.53099e-14	-0.378425	0.057	0.265	1.72311e-09	2_uninjured_vs_2_injured_3day		Endoneurial fibroblasts
Pdlim74	9.77875e-14	-0.47592	0.098	0.343	1.7679e-09	2_uninjured_vs_2_injured_3day		Endoneurial fibroblasts
Sdc4	1.03515e-13	-0.554679	0.254	0.57	1.87144e-09	2_uninjured_vs_2_injured_3day		Endoneurial fibroblasts
Slc41a2	1.10311e-13	-0.338281	0.022	0.184	1.9943e-09	2_uninjured_vs_2_injured_3day		Endoneurial fibroblasts
Mxra82	1.11162e-13	1.28394	0.545	0.408	2.0097e-09	2_uninjured_vs_2_injured_3day		Endoneurial fibroblasts
Nagk3	1.12819e-13	-0.400527	0.105	0.356	2.03965e-09	2_uninjured_vs_2_injured_3day		Endoneurial fibroblasts
Tfpi22	1.13685e-13	-0.343447	0.05	0.249	2.05531e-09	2_uninjured_vs_2_injured_3day		Endoneurial fibroblasts
Akt1s11	1.1656e-13	-0.362593	0.024	0.191	2.10728e-09	2_uninjured_vs_2_injured_3day		Endoneurial fibroblasts
Cygb2	1.18316e-13	-0.555817	0.225	0.537	2.13903e-09	2_uninjured_vs_2_injured_3day		Endoneurial fibroblasts
Kirrel3	1.38493e-13	-0.443842	0.069	0.285	2.50382e-09	2_uninjured_vs_2_injured_3day		Endoneurial fibroblasts
Serbp12	1.40729e-13	-0.689154	0.519	0.773	2.54423e-09	2_uninjured_vs_2_injured_3day		Endoneurial fibroblasts
Capn2	1.49518e-13	-0.521349	0.179	0.463	2.70314e-09	2_uninjured_vs_2_injured_3day		Endoneurial fibroblasts
Saa2	1.50011e-13	-0.433639	0.007	0.146	2.71206e-09	2_uninjured_vs_2_injured_3day		Endoneurial fibroblasts
Ap2b12	1.51209e-13	-0.418131	0.072	0.291	2.73371e-09	2_uninjured_vs_2_injured_3day		Endoneurial fibroblasts
Ttyh32	1.52498e-13	-0.482431	0.014	0.165	2.757e-09	2_uninjured_vs_2_injured_3day		Endoneurial fibroblasts
Rpl21-ps64	1.56314e-13	-0.382687	0.017	0.172	2.82599e-09	2_uninjured_vs_2_injured_3day		Endoneurial fibroblasts
Pitpna4	1.56973e-13	-0.385242	0.086	0.32	2.83791e-09	2_uninjured_vs_2_injured_3day		Endoneurial fibroblasts
Cdc42se21	1.62476e-13	-0.453184	0.103	0.35	2.9374e-09	2_uninjured_vs_2_injured_3day		Endoneurial fibroblasts
Gsto13	1.65505e-13	-0.313216	0.012	0.159	2.99217e-09	2_uninjured_vs_2_injured_3day		Endoneurial fibroblasts
Mapre12	1.66311e-13	-0.516785	0.254	0.573	3.00675e-09	2_uninjured_vs_2_injured_3day		Endoneurial fibroblasts
Lamtor22	1.68678e-13	-0.562548	0.227	0.547	3.04953e-09	2_uninjured_vs_2_injured_3day		Endoneurial fibroblasts
Rpl185	1.69169e-13	-0.768229	0.443	0.696	3.0584e-09	2_uninjured_vs_2_injured_3day		Endoneurial fibroblasts
Lrrc591	1.7537e-13	-0.313176	0.1	0.346	3.17051e-09	2_uninjured_vs_2_injured_3day		Endoneurial fibroblasts
G3bp12	1.779e-13	-0.512689	0.093	0.327	3.21626e-09	2_uninjured_vs_2_injured_3day		Endoneurial fibroblasts
Tia12	1.86336e-13	-0.329068	0.081	0.311	3.36877e-09	2_uninjured_vs_2_injured_3day		Endoneurial fibroblasts
Hivep22	1.98137e-13	-0.529791	0.06	0.262	3.58212e-09	2_uninjured_vs_2_injured_3day		Endoneurial fibroblasts
Strap3	1.99589e-13	-0.624127	0.122	0.375	3.60838e-09	2_uninjured_vs_2_injured_3day		Endoneurial fibroblasts
Plec4	2.01138e-13	-0.465067	0.091	0.324	3.63638e-09	2_uninjured_vs_2_injured_3day		Endoneurial fibroblasts
Tbcb2	2.03382e-13	-0.501716	0.182	0.476	3.67694e-09	2_uninjured_vs_2_injured_3day		Endoneurial fibroblasts
Plxnb21	2.11115e-13	-0.503044	0.036	0.214	3.81674e-09	2_uninjured_vs_2_injured_3day		Endoneurial fibroblasts
Eno14	2.1759e-13	-0.418432	0.105	0.35	3.9338e-09	2_uninjured_vs_2_injured_3day		Endoneurial fibroblasts
Gm248654	2.28064e-13	-0.400799	0.022	0.181	4.12317e-09	2_uninjured_vs_2_injured_3day		Endoneurial fibroblasts
Tmem1734	2.3303e-13	-0.342481	0.022	0.181	4.21296e-09	2_uninjured_vs_2_injured_3day		Endoneurial fibroblasts
Mpi	2.38519e-13	-0.398616	0.031	0.204	4.31219e-09	2_uninjured_vs_2_injured_3day		Endoneurial fibroblasts
Arhgef402	2.47241e-13	-0.371792	0.129	0.392	4.46987e-09	2_uninjured_vs_2_injured_3day		Endoneurial fibroblasts
Wdr62	2.49621e-13	-0.389892	0.019	0.175	4.51289e-09	2_uninjured_vs_2_injured_3day		Endoneurial fibroblasts
Bnip23	2.53545e-13	-0.546655	0.17	0.453	4.58385e-09	2_uninjured_vs_2_injured_3day		Endoneurial fibroblasts
Scara53	2.67589e-13	0.851612	0.689	0.566	4.83775e-09	2_uninjured_vs_2_injured_3day		Endoneurial fibroblasts
Pbrm1	2.72423e-13	-0.368383	0.211	0.534	4.92514e-09	2_uninjured_vs_2_injured_3day		Endoneurial fibroblasts
Gpc13	2.86777e-13	-0.442952	0.065	0.272	5.18464e-09	2_uninjured_vs_2_injured_3day		Endoneurial fibroblasts
1500012F01Rik6	2.92907e-13	-0.577179	0.196	0.492	5.29547e-09	2_uninjured_vs_2_injured_3day		Endoneurial fibroblasts
Utp32	3.00726e-13	-0.393034	0.098	0.34	5.43682e-09	2_uninjured_vs_2_injured_3day		Endoneurial fibroblasts
Cxcl123	3.00785e-13	1.03755	0.61	0.456	5.4379e-09	2_uninjured_vs_2_injured_3day		Endoneurial fibroblasts
Malat15	3.046e-13	0.427525	0.981	0.913	5.50687e-09	2_uninjured_vs_2_injured_3day		Endoneurial fibroblasts
Gys1	3.21884e-13	-0.312186	0.007	0.142	5.81935e-09	2_uninjured_vs_2_injured_3day		Endoneurial fibroblasts
Dtx4	3.40859e-13	-0.436464	0.139	0.405	6.16239e-09	2_uninjured_vs_2_injured_3day		Endoneurial fibroblasts
Pdgfra3	3.56497e-13	0.998209	0.658	0.592	6.44511e-09	2_uninjured_vs_2_injured_3day		Endoneurial fibroblasts
Ywhae3	3.60551e-13	-0.722779	0.419	0.718	6.5184e-09	2_uninjured_vs_2_injured_3day		Endoneurial fibroblasts
Cks1b3	3.77432e-13	-0.481993	0.074	0.288	6.82359e-09	2_uninjured_vs_2_injured_3day		Endoneurial fibroblasts
Ylpm12	3.77725e-13	-0.410318	0.062	0.265	6.8289e-09	2_uninjured_vs_2_injured_3day		Endoneurial fibroblasts
Nans3	3.81814e-13	-0.394125	0.098	0.337	6.90282e-09	2_uninjured_vs_2_injured_3day		Endoneurial fibroblasts
Vtn2	3.89918e-13	1.31163	0.301	0.094	7.04933e-09	2_uninjured_vs_2_injured_3day		Endoneurial fibroblasts
Pmpca2	3.9312e-13	-0.406839	0.024	0.184	7.10722e-09	2_uninjured_vs_2_injured_3day		Endoneurial fibroblasts
Ak24	4.03072e-13	-0.420438	0.053	0.246	7.28714e-09	2_uninjured_vs_2_injured_3day		Endoneurial fibroblasts
Flnc2	4.08495e-13	-0.32764	0.098	0.34	7.38519e-09	2_uninjured_vs_2_injured_3day		Endoneurial fibroblasts
Ptprf2	4.31098e-13	-0.508018	0.029	0.194	7.79383e-09	2_uninjured_vs_2_injured_3day		Endoneurial fibroblasts
Snrpf1	4.35695e-13	-0.535503	0.189	0.482	7.87693e-09	2_uninjured_vs_2_injured_3day		Endoneurial fibroblasts
C4b2	4.3852e-13	-0.352825	0.031	0.201	7.92801e-09	2_uninjured_vs_2_injured_3day		Endoneurial fibroblasts
Slc29a12	4.39324e-13	1.08394	0.392	0.181	7.94254e-09	2_uninjured_vs_2_injured_3day		Endoneurial fibroblasts
Il1r15	4.53324e-13	-0.600513	0.045	0.23	8.19565e-09	2_uninjured_vs_2_injured_3day		Endoneurial fibroblasts
Rpl10-ps34	4.56069e-13	-0.582721	0.096	0.327	8.24528e-09	2_uninjured_vs_2_injured_3day		Endoneurial fibroblasts
Mrpl243	4.62882e-13	-0.563962	0.077	0.291	8.36844e-09	2_uninjured_vs_2_injured_3day		Endoneurial fibroblasts
Rps53	4.65914e-13	-0.670669	0.742	0.845	8.42326e-09	2_uninjured_vs_2_injured_3day		Endoneurial fibroblasts
Ptpn22	4.70099e-13	-0.519382	0.057	0.259	8.49892e-09	2_uninjured_vs_2_injured_3day		Endoneurial fibroblasts
Ybx31	4.97362e-13	-0.577069	0.285	0.605	8.9918e-09	2_uninjured_vs_2_injured_3day		Endoneurial fibroblasts
Srsf12	5.04447e-13	-0.452289	0.093	0.324	9.11991e-09	2_uninjured_vs_2_injured_3day		Endoneurial fibroblasts
Skil4	5.11996e-13	-0.376395	0.019	0.172	9.25638e-09	2_uninjured_vs_2_injured_3day		Endoneurial fibroblasts
Adamts45	5.21828e-13	-0.518768	0.057	0.252	9.43413e-09	2_uninjured_vs_2_injured_3day		Endoneurial fibroblasts
Mapk1ip1l3	5.3029e-13	-0.374981	0.055	0.249	9.58712e-09	2_uninjured_vs_2_injured_3day		Endoneurial fibroblasts
Rabggtb2	5.57515e-13	-0.376784	0.105	0.343	1.00793e-08	2_uninjured_vs_2_injured_3day		Endoneurial fibroblasts
Dnajc26	5.8753e-13	-0.650454	0.077	0.288	1.0622e-08	2_uninjured_vs_2_injured_3day		Endoneurial fibroblasts
1110065P20Rik2	5.98509e-13	-0.315183	0.091	0.32	1.08204e-08	2_uninjured_vs_2_injured_3day		Endoneurial fibroblasts
Ppa11	6.02954e-13	-0.58347	0.072	0.282	1.09008e-08	2_uninjured_vs_2_injured_3day		Endoneurial fibroblasts
Gcnt1	6.13003e-13	-0.382526	0.019	0.172	1.10825e-08	2_uninjured_vs_2_injured_3day		Endoneurial fibroblasts
Olfml2a2	6.30507e-13	-0.425376	0.033	0.204	1.13989e-08	2_uninjured_vs_2_injured_3day		Endoneurial fibroblasts
Ccng11	6.64743e-13	-0.565498	0.141	0.401	1.20179e-08	2_uninjured_vs_2_injured_3day		Endoneurial fibroblasts
Golim42	6.84374e-13	-0.619116	0.299	0.621	1.23728e-08	2_uninjured_vs_2_injured_3day		Endoneurial fibroblasts
Cxcl143	6.90361e-13	-0.452651	0.057	0.252	1.2481e-08	2_uninjured_vs_2_injured_3day		Endoneurial fibroblasts
Plscr34	6.91009e-13	-0.407991	0.11	0.353	1.24928e-08	2_uninjured_vs_2_injured_3day		Endoneurial fibroblasts
Sqle	6.93741e-13	1.2997	0.27	0.078	1.25421e-08	2_uninjured_vs_2_injured_3day		Endoneurial fibroblasts
Uhrf1bp1l	7.35525e-13	-0.390524	0.031	0.197	1.32976e-08	2_uninjured_vs_2_injured_3day		Endoneurial fibroblasts
Slc16a13	7.4599e-13	-0.452186	0.045	0.227	1.34867e-08	2_uninjured_vs_2_injured_3day		Endoneurial fibroblasts
Pomp2	7.56779e-13	-0.546832	0.22	0.515	1.36818e-08	2_uninjured_vs_2_injured_3day		Endoneurial fibroblasts
Mdm2	8.34475e-13	-0.513851	0.077	0.291	1.50865e-08	2_uninjured_vs_2_injured_3day		Endoneurial fibroblasts
Etf14	8.48014e-13	-0.367833	0.194	0.489	1.53312e-08	2_uninjured_vs_2_injured_3day		Endoneurial fibroblasts
Wdr45b2	8.71615e-13	-0.369422	0.086	0.307	1.57579e-08	2_uninjured_vs_2_injured_3day		Endoneurial fibroblasts
Atp2c13	9.06323e-13	-0.451142	0.117	0.366	1.63854e-08	2_uninjured_vs_2_injured_3day		Endoneurial fibroblasts
Dhrs42	9.10671e-13	-0.325189	0.041	0.22	1.6464e-08	2_uninjured_vs_2_injured_3day		Endoneurial fibroblasts
Eif3f4	9.30415e-13	-0.558483	0.318	0.628	1.6821e-08	2_uninjured_vs_2_injured_3day		Endoneurial fibroblasts
Trrap1	9.90014e-13	-0.391137	0.024	0.181	1.78985e-08	2_uninjured_vs_2_injured_3day		Endoneurial fibroblasts
Pmp225	9.9934e-13	1.0117	0.505	0.327	1.80671e-08	2_uninjured_vs_2_injured_3day		Endoneurial fibroblasts
Arpc1b3	9.99584e-13	-0.703691	0.555	0.748	1.80715e-08	2_uninjured_vs_2_injured_3day		Endoneurial fibroblasts
Chd32	1.0455e-12	-0.449058	0.218	0.524	1.89016e-08	2_uninjured_vs_2_injured_3day		Endoneurial fibroblasts
Ptgr13	1.06089e-12	-0.530448	0.06	0.252	1.91798e-08	2_uninjured_vs_2_injured_3day		Endoneurial fibroblasts
Ncl4	1.07051e-12	-0.918073	0.464	0.722	1.93537e-08	2_uninjured_vs_2_injured_3day		Endoneurial fibroblasts
Sf3b52	1.07508e-12	-0.560188	0.184	0.476	1.94363e-08	2_uninjured_vs_2_injured_3day		Endoneurial fibroblasts
Atp5o2	1.1051e-12	-0.653249	0.304	0.599	1.99792e-08	2_uninjured_vs_2_injured_3day		Endoneurial fibroblasts
Tubb54	1.11624e-12	-0.811999	0.352	0.663	2.01805e-08	2_uninjured_vs_2_injured_3day		Endoneurial fibroblasts
Tenm32	1.12188e-12	-0.504688	0.084	0.301	2.02825e-08	2_uninjured_vs_2_injured_3day		Endoneurial fibroblasts
Chmp4b5	1.12247e-12	-0.739156	0.292	0.595	2.02932e-08	2_uninjured_vs_2_injured_3day		Endoneurial fibroblasts
Ddx21	1.16932e-12	-0.532998	0.105	0.343	2.11401e-08	2_uninjured_vs_2_injured_3day		Endoneurial fibroblasts
Tmem63b1	1.1781e-12	-0.41205	0.041	0.217	2.12988e-08	2_uninjured_vs_2_injured_3day		Endoneurial fibroblasts
Hnrnpab5	1.19314e-12	-0.545499	0.323	0.628	2.15708e-08	2_uninjured_vs_2_injured_3day		Endoneurial fibroblasts
Uba13	1.21571e-12	-0.373348	0.141	0.408	2.19787e-08	2_uninjured_vs_2_injured_3day		Endoneurial fibroblasts
Metap23	1.24894e-12	-0.323296	0.237	0.544	2.25796e-08	2_uninjured_vs_2_injured_3day		Endoneurial fibroblasts
Ccnd26	1.25278e-12	-0.795506	0.373	0.647	2.2649e-08	2_uninjured_vs_2_injured_3day		Endoneurial fibroblasts
Nfxl1	1.25869e-12	-0.334534	0.043	0.223	2.27558e-08	2_uninjured_vs_2_injured_3day		Endoneurial fibroblasts
Cmpk14	1.27391e-12	-0.414016	0.156	0.434	2.3031e-08	2_uninjured_vs_2_injured_3day		Endoneurial fibroblasts
Cmc14	1.32254e-12	-0.344837	0.067	0.272	2.39102e-08	2_uninjured_vs_2_injured_3day		Endoneurial fibroblasts
Plscr2	1.32803e-12	-0.41133	0.012	0.149	2.40095e-08	2_uninjured_vs_2_injured_3day		Endoneurial fibroblasts
Tenm2	1.33332e-12	-0.691532	0.22	0.498	2.41052e-08	2_uninjured_vs_2_injured_3day		Endoneurial fibroblasts
Gm101265	1.33592e-12	-0.337038	0.041	0.217	2.4152e-08	2_uninjured_vs_2_injured_3day		Endoneurial fibroblasts
Ndufa18	1.39846e-12	-0.583215	0.311	0.621	2.52827e-08	2_uninjured_vs_2_injured_3day		Endoneurial fibroblasts
Sec24b	1.44574e-12	-0.313153	0.041	0.217	2.61375e-08	2_uninjured_vs_2_injured_3day		Endoneurial fibroblasts
Ankrd13a1	1.45593e-12	-0.304001	0.026	0.184	2.63218e-08	2_uninjured_vs_2_injured_3day		Endoneurial fibroblasts
Uaca4	1.48468e-12	-0.623122	0.194	0.476	2.68416e-08	2_uninjured_vs_2_injured_3day		Endoneurial fibroblasts
Cxx1c2	1.48716e-12	-0.448813	0.093	0.317	2.68864e-08	2_uninjured_vs_2_injured_3day		Endoneurial fibroblasts
Sema3b2	1.55319e-12	1.12058	0.325	0.129	2.80801e-08	2_uninjured_vs_2_injured_3day		Endoneurial fibroblasts
Pfkp1	1.57678e-12	-0.316932	0.062	0.262	2.85066e-08	2_uninjured_vs_2_injured_3day		Endoneurial fibroblasts
Dok11	1.59995e-12	-0.285064	0.012	0.149	2.89255e-08	2_uninjured_vs_2_injured_3day		Endoneurial fibroblasts
Dusp62	1.67992e-12	-0.459834	0.263	0.56	3.03713e-08	2_uninjured_vs_2_injured_3day		Endoneurial fibroblasts
Snd1	1.69357e-12	-0.527147	0.074	0.285	3.06181e-08	2_uninjured_vs_2_injured_3day		Endoneurial fibroblasts
Sav11	1.70866e-12	-0.347527	0.091	0.314	3.08909e-08	2_uninjured_vs_2_injured_3day		Endoneurial fibroblasts
Plekhg2	1.83767e-12	-0.312416	0.031	0.194	3.32233e-08	2_uninjured_vs_2_injured_3day		Endoneurial fibroblasts
Cand13	1.83807e-12	-0.424321	0.053	0.239	3.32304e-08	2_uninjured_vs_2_injured_3day		Endoneurial fibroblasts
Rpl37a4	1.84434e-12	-0.658033	0.703	0.809	3.33439e-08	2_uninjured_vs_2_injured_3day		Endoneurial fibroblasts
Sh3glb13	1.85591e-12	-0.482161	0.27	0.573	3.3553e-08	2_uninjured_vs_2_injured_3day		Endoneurial fibroblasts
Gm231922	1.86079e-12	-0.328765	0	0.113	3.36412e-08	2_uninjured_vs_2_injured_3day		Endoneurial fibroblasts
Zkscan14	1.90245e-12	-0.386711	0.132	0.388	3.43944e-08	2_uninjured_vs_2_injured_3day		Endoneurial fibroblasts
Lypla22	1.90996e-12	-0.512514	0.089	0.304	3.45301e-08	2_uninjured_vs_2_injured_3day		Endoneurial fibroblasts
Ctr9	1.92095e-12	-0.368435	0.086	0.307	3.47289e-08	2_uninjured_vs_2_injured_3day		Endoneurial fibroblasts
Hmg20b	1.94472e-12	-0.525528	0.167	0.437	3.51586e-08	2_uninjured_vs_2_injured_3day		Endoneurial fibroblasts
D15Ertd621e1	2.09791e-12	-0.328924	0.043	0.22	3.79282e-08	2_uninjured_vs_2_injured_3day		Endoneurial fibroblasts
Timm132	2.13014e-12	-0.680441	0.213	0.485	3.85109e-08	2_uninjured_vs_2_injured_3day		Endoneurial fibroblasts
Erdr12	2.15709e-12	-0.460387	0.096	0.32	3.89981e-08	2_uninjured_vs_2_injured_3day		Endoneurial fibroblasts
Bola3	2.22428e-12	-0.526057	0.096	0.317	4.02127e-08	2_uninjured_vs_2_injured_3day		Endoneurial fibroblasts
Kctd112	2.2473e-12	-0.426548	0.043	0.217	4.06289e-08	2_uninjured_vs_2_injured_3day		Endoneurial fibroblasts
Pgrmc13	2.31032e-12	0.99291	0.524	0.366	4.17683e-08	2_uninjured_vs_2_injured_3day		Endoneurial fibroblasts
Ecm26	2.41981e-12	1.20531	0.325	0.126	4.37477e-08	2_uninjured_vs_2_injured_3day		Endoneurial fibroblasts
Ube4b	2.4509e-12	-0.480793	0.041	0.214	4.43098e-08	2_uninjured_vs_2_injured_3day		Endoneurial fibroblasts
Flot12	2.55818e-12	-0.510528	0.108	0.34	4.62493e-08	2_uninjured_vs_2_injured_3day		Endoneurial fibroblasts
Rpl195	2.56158e-12	-0.565506	0.175	0.443	4.63108e-08	2_uninjured_vs_2_injured_3day		Endoneurial fibroblasts
Mdp12	2.57138e-12	-0.260257	0.067	0.269	4.6488e-08	2_uninjured_vs_2_injured_3day		Endoneurial fibroblasts
Rab311	2.64206e-12	-0.389796	0.026	0.181	4.77658e-08	2_uninjured_vs_2_injured_3day		Endoneurial fibroblasts
Tpr	2.67015e-12	-0.263714	0.222	0.544	4.82736e-08	2_uninjured_vs_2_injured_3day		Endoneurial fibroblasts
Srek1ip1	2.67864e-12	-0.354835	0.055	0.243	4.84271e-08	2_uninjured_vs_2_injured_3day		Endoneurial fibroblasts
Caprin12	2.70312e-12	-0.387465	0.139	0.401	4.88697e-08	2_uninjured_vs_2_injured_3day		Endoneurial fibroblasts
Glce	2.72632e-12	-0.282669	0.084	0.301	4.92891e-08	2_uninjured_vs_2_injured_3day		Endoneurial fibroblasts
Pi153	2.7502e-12	-0.513809	0.007	0.133	4.97209e-08	2_uninjured_vs_2_injured_3day		Endoneurial fibroblasts
Rab5c2	2.80937e-12	-0.320635	0.105	0.343	5.07906e-08	2_uninjured_vs_2_injured_3day		Endoneurial fibroblasts
Cfl21	2.83893e-12	-0.476849	0.225	0.534	5.1325e-08	2_uninjured_vs_2_injured_3day		Endoneurial fibroblasts
Baz1a3	2.85465e-12	-0.384817	0.014	0.152	5.16092e-08	2_uninjured_vs_2_injured_3day		Endoneurial fibroblasts
Samd4b	2.8934e-12	-0.279671	0.096	0.32	5.23099e-08	2_uninjured_vs_2_injured_3day		Endoneurial fibroblasts
Hdgf5	2.92901e-12	-0.55275	0.208	0.498	5.29536e-08	2_uninjured_vs_2_injured_3day		Endoneurial fibroblasts
Sez62	2.94766e-12	-0.380108	0.005	0.126	5.32908e-08	2_uninjured_vs_2_injured_3day		Endoneurial fibroblasts
Fat12	3.04248e-12	-0.502165	0.065	0.262	5.50051e-08	2_uninjured_vs_2_injured_3day		Endoneurial fibroblasts
Cops31	3.06581e-12	-0.319812	0.074	0.282	5.54267e-08	2_uninjured_vs_2_injured_3day		Endoneurial fibroblasts
Ndufa132	3.06779e-12	-0.576479	0.402	0.696	5.54626e-08	2_uninjured_vs_2_injured_3day		Endoneurial fibroblasts
Itgam2	3.07814e-12	-0.257039	0.029	0.188	5.56497e-08	2_uninjured_vs_2_injured_3day		Endoneurial fibroblasts
Uqcr114	3.08512e-12	-0.655631	0.333	0.647	5.57759e-08	2_uninjured_vs_2_injured_3day		Endoneurial fibroblasts
Gusb3	3.13354e-12	-0.280765	0.091	0.311	5.66512e-08	2_uninjured_vs_2_injured_3day		Endoneurial fibroblasts
Mndal5	3.15618e-12	-0.355219	0.062	0.256	5.70606e-08	2_uninjured_vs_2_injured_3day		Endoneurial fibroblasts
Gm47752	3.20744e-12	-0.268594	0.007	0.133	5.79872e-08	2_uninjured_vs_2_injured_3day		Endoneurial fibroblasts
Ehmt2	3.32396e-12	-0.576344	0.117	0.353	6.00939e-08	2_uninjured_vs_2_injured_3day		Endoneurial fibroblasts
Ext15	3.37408e-12	-0.421455	0.136	0.388	6.10001e-08	2_uninjured_vs_2_injured_3day		Endoneurial fibroblasts
Zmat24	3.38473e-12	-0.581771	0.151	0.411	6.11926e-08	2_uninjured_vs_2_injured_3day		Endoneurial fibroblasts
Gm227604	3.39934e-12	-0.302805	0.01	0.139	6.14568e-08	2_uninjured_vs_2_injured_3day		Endoneurial fibroblasts
Mrpl542	3.44297e-12	-0.513557	0.105	0.333	6.22454e-08	2_uninjured_vs_2_injured_3day		Endoneurial fibroblasts
Cct34	3.54855e-12	-0.455427	0.134	0.379	6.41543e-08	2_uninjured_vs_2_injured_3day		Endoneurial fibroblasts
Fkbp102	3.55696e-12	-0.517459	0.201	0.485	6.43062e-08	2_uninjured_vs_2_injured_3day		Endoneurial fibroblasts
Ripk3	3.56497e-12	-0.307595	0.01	0.139	6.44511e-08	2_uninjured_vs_2_injured_3day		Endoneurial fibroblasts
Ddx413	3.71441e-12	-0.509843	0.06	0.249	6.71528e-08	2_uninjured_vs_2_injured_3day		Endoneurial fibroblasts
Fndc12	3.88072e-12	-0.408255	0.024	0.175	7.01596e-08	2_uninjured_vs_2_injured_3day		Endoneurial fibroblasts
Gm239354	3.95497e-12	-0.331764	0.053	0.236	7.15019e-08	2_uninjured_vs_2_injured_3day		Endoneurial fibroblasts
Sccpdh	3.95754e-12	-0.343154	0.029	0.184	7.15484e-08	2_uninjured_vs_2_injured_3day		Endoneurial fibroblasts
Ndrg14	3.99894e-12	1.11634	0.383	0.194	7.22969e-08	2_uninjured_vs_2_injured_3day		Endoneurial fibroblasts
Ptbp12	4.43285e-12	-0.268896	0.122	0.366	8.01416e-08	2_uninjured_vs_2_injured_3day		Endoneurial fibroblasts
Fxyd52	4.47989e-12	-0.396776	0.153	0.414	8.0992e-08	2_uninjured_vs_2_injured_3day		Endoneurial fibroblasts
Rasgrp22	4.66634e-12	1.04801	0.622	0.531	8.43628e-08	2_uninjured_vs_2_injured_3day		Endoneurial fibroblasts
Ndufa112	4.70981e-12	-0.434007	0.251	0.563	8.51487e-08	2_uninjured_vs_2_injured_3day		Endoneurial fibroblasts
Ergic2	4.83604e-12	-0.311585	0.132	0.382	8.74308e-08	2_uninjured_vs_2_injured_3day		Endoneurial fibroblasts
Prpf40a4	5.00326e-12	-0.563036	0.213	0.495	9.0454e-08	2_uninjured_vs_2_injured_3day		Endoneurial fibroblasts
Dnajc18	5.00705e-12	-0.385535	0.026	0.178	9.05225e-08	2_uninjured_vs_2_injured_3day		Endoneurial fibroblasts
Rpl9-ps14	5.08299e-12	-0.551257	0.038	0.204	9.18954e-08	2_uninjured_vs_2_injured_3day		Endoneurial fibroblasts
Ehd14	5.08515e-12	-0.291057	0.098	0.327	9.19345e-08	2_uninjured_vs_2_injured_3day		Endoneurial fibroblasts
Tmem43	5.14329e-12	-0.285002	0.1	0.33	9.29855e-08	2_uninjured_vs_2_injured_3day		Endoneurial fibroblasts
Sc5d	5.1615e-12	0.805581	0.189	0.023	9.33148e-08	2_uninjured_vs_2_injured_3day		Endoneurial fibroblasts
Lrp13	5.17186e-12	-0.76834	0.56	0.78	9.35021e-08	2_uninjured_vs_2_injured_3day		Endoneurial fibroblasts
Prr5	5.66797e-12	-0.272278	0.029	0.184	1.02471e-07	2_uninjured_vs_2_injured_3day		Endoneurial fibroblasts
Mrpl202	5.79581e-12	-0.641832	0.146	0.392	1.04782e-07	2_uninjured_vs_2_injured_3day		Endoneurial fibroblasts
Cox191	5.87467e-12	-0.335708	0.041	0.21	1.06208e-07	2_uninjured_vs_2_injured_3day		Endoneurial fibroblasts
Zfp3621	5.92101e-12	-0.375848	0.031	0.188	1.07046e-07	2_uninjured_vs_2_injured_3day		Endoneurial fibroblasts
Asun2	5.9545e-12	-0.342775	0.043	0.214	1.07651e-07	2_uninjured_vs_2_injured_3day		Endoneurial fibroblasts
Rai142	5.97481e-12	-0.470541	0.005	0.123	1.08019e-07	2_uninjured_vs_2_injured_3day		Endoneurial fibroblasts
Aldh1a1	6.06759e-12	1.04502	0.306	0.113	1.09696e-07	2_uninjured_vs_2_injured_3day		Endoneurial fibroblasts
Csmd1	6.17631e-12	-0.557446	0.01	0.136	1.11661e-07	2_uninjured_vs_2_injured_3day		Endoneurial fibroblasts
Sidt22	6.27756e-12	-0.433306	0.079	0.285	1.13492e-07	2_uninjured_vs_2_injured_3day		Endoneurial fibroblasts
Itm2a4	6.59171e-12	0.693434	0.873	0.838	1.19171e-07	2_uninjured_vs_2_injured_3day		Endoneurial fibroblasts
Ndufa33	6.59193e-12	-0.531615	0.311	0.628	1.19175e-07	2_uninjured_vs_2_injured_3day		Endoneurial fibroblasts
Ubfd11	6.70758e-12	-0.362451	0.057	0.243	1.21266e-07	2_uninjured_vs_2_injured_3day		Endoneurial fibroblasts
Ccnb21	6.71134e-12	-0.4602	0.01	0.136	1.21334e-07	2_uninjured_vs_2_injured_3day		Endoneurial fibroblasts
Gm52394	6.83149e-12	-0.301559	0.017	0.155	1.23507e-07	2_uninjured_vs_2_injured_3day		Endoneurial fibroblasts
Cyth32	6.84229e-12	-0.491179	0.184	0.466	1.23702e-07	2_uninjured_vs_2_injured_3day		Endoneurial fibroblasts
Dnajb17	7.0249e-12	2.10034	0.548	0.44	1.27003e-07	2_uninjured_vs_2_injured_3day		Endoneurial fibroblasts
Ostc5	7.05734e-12	-0.656997	0.419	0.718	1.2759e-07	2_uninjured_vs_2_injured_3day		Endoneurial fibroblasts
Tspo2	7.09522e-12	-0.524441	0.239	0.54	1.28275e-07	2_uninjured_vs_2_injured_3day		Endoneurial fibroblasts
Myo1b4	7.14437e-12	-0.276541	0.103	0.333	1.29163e-07	2_uninjured_vs_2_injured_3day		Endoneurial fibroblasts
Ptp4a25	7.26297e-12	-0.661928	0.368	0.68	1.31307e-07	2_uninjured_vs_2_injured_3day		Endoneurial fibroblasts
Gab1	7.36568e-12	-0.430912	0.069	0.265	1.33164e-07	2_uninjured_vs_2_injured_3day		Endoneurial fibroblasts
Hrsp12	7.62177e-12	-0.597017	0.258	0.547	1.37794e-07	2_uninjured_vs_2_injured_3day		Endoneurial fibroblasts
Ssbp3	7.6289e-12	-0.429645	0.086	0.294	1.37923e-07	2_uninjured_vs_2_injured_3day		Endoneurial fibroblasts
Arpp193	7.67229e-12	-0.361582	0.172	0.447	1.38707e-07	2_uninjured_vs_2_injured_3day		Endoneurial fibroblasts
Cox173	7.74372e-12	-0.622703	0.251	0.547	1.39999e-07	2_uninjured_vs_2_injured_3day		Endoneurial fibroblasts
Id36	7.89435e-12	1.6735	0.495	0.311	1.42722e-07	2_uninjured_vs_2_injured_3day		Endoneurial fibroblasts
Tfg	8.22548e-12	-0.487465	0.12	0.35	1.48708e-07	2_uninjured_vs_2_injured_3day		Endoneurial fibroblasts
Twist1	8.3004e-12	-0.289566	0.074	0.275	1.50063e-07	2_uninjured_vs_2_injured_3day		Endoneurial fibroblasts
Cfdp13	8.34519e-12	-0.592818	0.256	0.553	1.50873e-07	2_uninjured_vs_2_injured_3day		Endoneurial fibroblasts
Rps153	8.42343e-12	-0.634019	0.739	0.803	1.52287e-07	2_uninjured_vs_2_injured_3day		Endoneurial fibroblasts
Ammecr1l1	8.6886e-12	-0.327083	0.081	0.291	1.57081e-07	2_uninjured_vs_2_injured_3day		Endoneurial fibroblasts
Rps27l4	8.70025e-12	-0.665339	0.397	0.683	1.57292e-07	2_uninjured_vs_2_injured_3day		Endoneurial fibroblasts
Rgs163	8.7023e-12	-0.734726	0.144	0.375	1.57329e-07	2_uninjured_vs_2_injured_3day		Endoneurial fibroblasts
Gnai22	8.73703e-12	-0.682744	0.433	0.699	1.57957e-07	2_uninjured_vs_2_injured_3day		Endoneurial fibroblasts
Ndufa23	8.77971e-12	-0.543844	0.423	0.735	1.58728e-07	2_uninjured_vs_2_injured_3day		Endoneurial fibroblasts
Ddx57	8.96368e-12	0.72145	0.778	0.725	1.62054e-07	2_uninjured_vs_2_injured_3day		Endoneurial fibroblasts
Ror21	9.00494e-12	-0.359104	0.065	0.256	1.628e-07	2_uninjured_vs_2_injured_3day		Endoneurial fibroblasts
Sumo32	9.11059e-12	-0.362622	0.112	0.346	1.6471e-07	2_uninjured_vs_2_injured_3day		Endoneurial fibroblasts
Med13l2	9.11747e-12	-0.339342	0.06	0.246	1.64835e-07	2_uninjured_vs_2_injured_3day		Endoneurial fibroblasts
Hnrnpul2	9.28719e-12	-0.431121	0.182	0.456	1.67903e-07	2_uninjured_vs_2_injured_3day		Endoneurial fibroblasts
Hmgn33	9.3715e-12	-0.466847	0.072	0.265	1.69427e-07	2_uninjured_vs_2_injured_3day		Endoneurial fibroblasts
Twf11	9.57044e-12	-0.421249	0.163	0.43	1.73024e-07	2_uninjured_vs_2_injured_3day		Endoneurial fibroblasts
Cct72	9.80529e-12	-0.366107	0.187	0.469	1.7727e-07	2_uninjured_vs_2_injured_3day		Endoneurial fibroblasts
Nras2	9.88706e-12	-0.434366	0.103	0.327	1.78748e-07	2_uninjured_vs_2_injured_3day		Endoneurial fibroblasts
Sepn12	1.00897e-11	-0.493215	0.081	0.285	1.82412e-07	2_uninjured_vs_2_injured_3day		Endoneurial fibroblasts
Cspg4	1.01918e-11	-0.743694	0.261	0.521	1.84257e-07	2_uninjured_vs_2_injured_3day		Endoneurial fibroblasts
Fam111a2	1.03415e-11	-0.475827	0.06	0.246	1.86964e-07	2_uninjured_vs_2_injured_3day		Endoneurial fibroblasts
Psme45	1.07894e-11	-0.431874	0.096	0.311	1.95061e-07	2_uninjured_vs_2_injured_3day		Endoneurial fibroblasts
S100a103	1.08358e-11	-0.59955	0.615	0.812	1.959e-07	2_uninjured_vs_2_injured_3day		Endoneurial fibroblasts
Dpy19l12	1.08436e-11	-0.311233	0.06	0.246	1.96042e-07	2_uninjured_vs_2_injured_3day		Endoneurial fibroblasts
Mpz4	1.10161e-11	0.753921	0.158	0.01	1.9916e-07	2_uninjured_vs_2_injured_3day		Endoneurial fibroblasts
Gm75893	1.11609e-11	-0.454504	0.06	0.246	2.01777e-07	2_uninjured_vs_2_injured_3day		Endoneurial fibroblasts
Rpl36al2	1.19451e-11	-0.499003	0.309	0.608	2.15955e-07	2_uninjured_vs_2_injured_3day		Endoneurial fibroblasts
Mex3a2	1.22815e-11	-0.266777	0.007	0.126	2.22037e-07	2_uninjured_vs_2_injured_3day		Endoneurial fibroblasts
Col26a1	1.28053e-11	-0.84658	0.263	0.524	2.31508e-07	2_uninjured_vs_2_injured_3day		Endoneurial fibroblasts
Larp12	1.28796e-11	-0.367825	0.041	0.207	2.32849e-07	2_uninjured_vs_2_injured_3day		Endoneurial fibroblasts
Cx3cl12	1.31109e-11	-0.345279	0.014	0.146	2.37032e-07	2_uninjured_vs_2_injured_3day		Endoneurial fibroblasts
Ednra3	1.31109e-11	-0.455152	0.014	0.146	2.37032e-07	2_uninjured_vs_2_injured_3day		Endoneurial fibroblasts
Rnf442	1.31263e-11	-0.510987	0.045	0.214	2.37311e-07	2_uninjured_vs_2_injured_3day		Endoneurial fibroblasts
Apeh1	1.3166e-11	-0.382959	0.031	0.184	2.38027e-07	2_uninjured_vs_2_injured_3day		Endoneurial fibroblasts
Fam101a	1.32964e-11	-0.31522	0.007	0.126	2.40386e-07	2_uninjured_vs_2_injured_3day		Endoneurial fibroblasts
Sike1	1.33012e-11	-0.278499	0.069	0.265	2.40473e-07	2_uninjured_vs_2_injured_3day		Endoneurial fibroblasts
Dtnbp13	1.47714e-11	-0.371474	0.069	0.262	2.67052e-07	2_uninjured_vs_2_injured_3day		Endoneurial fibroblasts
Gm45404	1.52963e-11	-0.334829	0.067	0.259	2.76542e-07	2_uninjured_vs_2_injured_3day		Endoneurial fibroblasts
Rpl18a6	1.61888e-11	-0.680549	0.419	0.68	2.92677e-07	2_uninjured_vs_2_injured_3day		Endoneurial fibroblasts
Slc35a21	1.66123e-11	-0.33778	0.096	0.311	3.00335e-07	2_uninjured_vs_2_injured_3day		Endoneurial fibroblasts
Snrpe1	1.75638e-11	-0.343454	0.184	0.463	3.17535e-07	2_uninjured_vs_2_injured_3day		Endoneurial fibroblasts
Cybb	1.79584e-11	-0.25968	0	0.104	3.2467e-07	2_uninjured_vs_2_injured_3day		Endoneurial fibroblasts
Trpm6	1.83869e-11	-0.343725	0.057	0.239	3.32417e-07	2_uninjured_vs_2_injured_3day		Endoneurial fibroblasts
Apbb1ip2	1.88686e-11	-0.38189	0.136	0.385	3.41125e-07	2_uninjured_vs_2_injured_3day		Endoneurial fibroblasts
Yeats43	1.88823e-11	-0.439131	0.048	0.217	3.41374e-07	2_uninjured_vs_2_injured_3day		Endoneurial fibroblasts
Ercc11	1.91617e-11	-0.262209	0.057	0.239	3.46424e-07	2_uninjured_vs_2_injured_3day		Endoneurial fibroblasts
Sdf24	1.93473e-11	-0.362604	0.215	0.515	3.49779e-07	2_uninjured_vs_2_injured_3day		Endoneurial fibroblasts
Ccdc234	1.96898e-11	-0.41062	0.12	0.35	3.55971e-07	2_uninjured_vs_2_injured_3day		Endoneurial fibroblasts
Fbln13	1.98091e-11	-0.288291	0.019	0.155	3.58129e-07	2_uninjured_vs_2_injured_3day		Endoneurial fibroblasts
Egflam	2.00394e-11	-0.434391	0.043	0.207	3.62292e-07	2_uninjured_vs_2_injured_3day		Endoneurial fibroblasts
Eif5a4	2.01154e-11	-0.694796	0.373	0.644	3.63666e-07	2_uninjured_vs_2_injured_3day		Endoneurial fibroblasts
Kpnb11	2.01563e-11	-0.653881	0.182	0.447	3.64406e-07	2_uninjured_vs_2_injured_3day		Endoneurial fibroblasts
Aebp2	2.02709e-11	-0.39843	0.06	0.239	3.66477e-07	2_uninjured_vs_2_injured_3day		Endoneurial fibroblasts
Hspa12a	2.1218e-11	-0.488219	0.017	0.149	3.836e-07	2_uninjured_vs_2_injured_3day		Endoneurial fibroblasts
Cpt1c2	2.14722e-11	-0.331888	0.065	0.252	3.88196e-07	2_uninjured_vs_2_injured_3day		Endoneurial fibroblasts
Atp5a12	2.25199e-11	-0.548449	0.373	0.667	4.07137e-07	2_uninjured_vs_2_injured_3day		Endoneurial fibroblasts
Tnxb3	2.29025e-11	-0.618408	0.139	0.369	4.14054e-07	2_uninjured_vs_2_injured_3day		Endoneurial fibroblasts
Ankfy12	2.32972e-11	-0.429389	0.033	0.188	4.21191e-07	2_uninjured_vs_2_injured_3day		Endoneurial fibroblasts
Soat1	2.34925e-11	-0.411077	0.122	0.353	4.24722e-07	2_uninjured_vs_2_injured_3day		Endoneurial fibroblasts
Klf24	2.37317e-11	1.81164	0.49	0.34	4.29045e-07	2_uninjured_vs_2_injured_3day		Endoneurial fibroblasts
Rpl22l14	2.39986e-11	-0.654957	0.584	0.796	4.33871e-07	2_uninjured_vs_2_injured_3day		Endoneurial fibroblasts
Bet13	2.42085e-11	-0.392152	0.108	0.327	4.37666e-07	2_uninjured_vs_2_injured_3day		Endoneurial fibroblasts
Parm1	2.47903e-11	-0.560546	0.1	0.307	4.48184e-07	2_uninjured_vs_2_injured_3day		Endoneurial fibroblasts
Csde11	2.51683e-11	-0.527473	0.225	0.505	4.55018e-07	2_uninjured_vs_2_injured_3day		Endoneurial fibroblasts
Litaf3	2.55418e-11	-0.475275	0.11	0.33	4.6177e-07	2_uninjured_vs_2_injured_3day		Endoneurial fibroblasts
Gm267355	2.5627e-11	-0.343452	0.012	0.136	4.6331e-07	2_uninjured_vs_2_injured_3day		Endoneurial fibroblasts
Ddx46	2.56486e-11	-0.499645	0.139	0.379	4.637e-07	2_uninjured_vs_2_injured_3day		Endoneurial fibroblasts
Nt5c5	2.67517e-11	-0.343676	0.084	0.288	4.83643e-07	2_uninjured_vs_2_injured_3day		Endoneurial fibroblasts
Marveld13	2.7056e-11	-0.362008	0.067	0.256	4.89145e-07	2_uninjured_vs_2_injured_3day		Endoneurial fibroblasts
Prss234	2.7218e-11	-0.502654	0.041	0.201	4.92074e-07	2_uninjured_vs_2_injured_3day		Endoneurial fibroblasts
Gcnt2	2.73657e-11	-0.270766	0.005	0.117	4.94745e-07	2_uninjured_vs_2_injured_3day		Endoneurial fibroblasts
Fau4	2.76026e-11	-0.295235	0.182	0.466	4.99027e-07	2_uninjured_vs_2_injured_3day		Endoneurial fibroblasts
Copg11	2.76696e-11	-0.339877	0.148	0.395	5.00239e-07	2_uninjured_vs_2_injured_3day		Endoneurial fibroblasts
Jak14	2.86808e-11	-0.402057	0.275	0.57	5.18519e-07	2_uninjured_vs_2_injured_3day		Endoneurial fibroblasts
Swi52	2.91763e-11	-0.637049	0.512	0.744	5.27479e-07	2_uninjured_vs_2_injured_3day		Endoneurial fibroblasts
Eny22	2.98359e-11	-0.518121	0.215	0.495	5.39403e-07	2_uninjured_vs_2_injured_3day		Endoneurial fibroblasts
Gria1	3.12163e-11	-0.394659	0.01	0.129	5.64359e-07	2_uninjured_vs_2_injured_3day		Endoneurial fibroblasts
Mbd2	3.23422e-11	-0.362543	0.069	0.259	5.84714e-07	2_uninjured_vs_2_injured_3day		Endoneurial fibroblasts
Pdia44	3.24908e-11	-0.449594	0.356	0.66	5.87402e-07	2_uninjured_vs_2_injured_3day		Endoneurial fibroblasts
Plat3	3.26521e-11	-0.544696	0.426	0.722	5.90317e-07	2_uninjured_vs_2_injured_3day		Endoneurial fibroblasts
Ccdc1042	3.41422e-11	-0.427992	0.196	0.469	6.17257e-07	2_uninjured_vs_2_injured_3day		Endoneurial fibroblasts
Rock13	3.42015e-11	-0.393214	0.201	0.472	6.18328e-07	2_uninjured_vs_2_injured_3day		Endoneurial fibroblasts
Lif	3.52091e-11	-0.329597	0.029	0.175	6.36546e-07	2_uninjured_vs_2_injured_3day		Endoneurial fibroblasts
Brd71	3.66248e-11	-0.302383	0.067	0.256	6.6214e-07	2_uninjured_vs_2_injured_3day		Endoneurial fibroblasts
Tpm44	3.95055e-11	-0.559941	0.378	0.66	7.1422e-07	2_uninjured_vs_2_injured_3day		Endoneurial fibroblasts
Usp342	3.96396e-11	-0.324214	0.148	0.401	7.16645e-07	2_uninjured_vs_2_injured_3day		Endoneurial fibroblasts
Slc30a51	3.97592e-11	-0.397676	0.074	0.265	7.18807e-07	2_uninjured_vs_2_injured_3day		Endoneurial fibroblasts
Arpc33	4.06448e-11	-0.498513	0.23	0.515	7.34817e-07	2_uninjured_vs_2_injured_3day		Endoneurial fibroblasts
Ssb2	4.11768e-11	-0.554558	0.388	0.657	7.44435e-07	2_uninjured_vs_2_injured_3day		Endoneurial fibroblasts
St131	4.18761e-11	-0.600655	0.335	0.625	7.57077e-07	2_uninjured_vs_2_injured_3day		Endoneurial fibroblasts
Ifi202b2	4.20242e-11	-0.643285	0.196	0.45	7.59755e-07	2_uninjured_vs_2_injured_3day		Endoneurial fibroblasts
Timm223	4.24325e-11	-0.388043	0.048	0.214	7.67136e-07	2_uninjured_vs_2_injured_3day		Endoneurial fibroblasts
Hs2st13	4.24366e-11	-0.4055	0.045	0.21	7.67212e-07	2_uninjured_vs_2_injured_3day		Endoneurial fibroblasts
Lims14	4.41106e-11	-0.413466	0.156	0.408	7.97476e-07	2_uninjured_vs_2_injured_3day		Endoneurial fibroblasts
Cct84	4.49383e-11	-0.516334	0.206	0.472	8.1244e-07	2_uninjured_vs_2_injured_3day		Endoneurial fibroblasts
Iqgap13	4.59818e-11	-0.585896	0.328	0.625	8.31305e-07	2_uninjured_vs_2_injured_3day		Endoneurial fibroblasts
Dynlt31	4.60622e-11	-0.3707	0.196	0.469	8.32759e-07	2_uninjured_vs_2_injured_3day		Endoneurial fibroblasts
Helz	4.82496e-11	-0.432077	0.053	0.223	8.72305e-07	2_uninjured_vs_2_injured_3day		Endoneurial fibroblasts
Tab22	4.83158e-11	-0.482754	0.134	0.362	8.73501e-07	2_uninjured_vs_2_injured_3day		Endoneurial fibroblasts
Lmna5	4.85334e-11	-0.509971	0.411	0.712	8.77436e-07	2_uninjured_vs_2_injured_3day		Endoneurial fibroblasts
Csf13	4.85367e-11	-0.337972	0.1	0.311	8.77495e-07	2_uninjured_vs_2_injured_3day		Endoneurial fibroblasts
Arid4b4	4.8613e-11	-0.428402	0.179	0.437	8.78875e-07	2_uninjured_vs_2_injured_3day		Endoneurial fibroblasts
Itga10	4.99261e-11	-0.272967	0.002	0.107	9.02615e-07	2_uninjured_vs_2_injured_3day		Endoneurial fibroblasts
Atp6v0a1	5.18664e-11	-0.26908	0.069	0.256	9.37692e-07	2_uninjured_vs_2_injured_3day		Endoneurial fibroblasts
Trib2	5.26286e-11	-0.498783	0.081	0.275	9.51473e-07	2_uninjured_vs_2_injured_3day		Endoneurial fibroblasts
Myo9b2	5.28328e-11	-0.294381	0.026	0.168	9.55164e-07	2_uninjured_vs_2_injured_3day		Endoneurial fibroblasts
Gm100644	5.35545e-11	-0.330431	0.014	0.139	9.68213e-07	2_uninjured_vs_2_injured_3day		Endoneurial fibroblasts
Krcc16	5.36034e-11	-0.432629	0.172	0.43	9.69097e-07	2_uninjured_vs_2_injured_3day		Endoneurial fibroblasts
Supt52	5.38269e-11	-0.332556	0.103	0.317	9.73137e-07	2_uninjured_vs_2_injured_3day		Endoneurial fibroblasts
Scd12	5.4869e-11	-0.363764	0.079	0.272	9.91977e-07	2_uninjured_vs_2_injured_3day		Endoneurial fibroblasts
Glrx32	5.50101e-11	-0.436345	0.167	0.427	9.94528e-07	2_uninjured_vs_2_injured_3day		Endoneurial fibroblasts
Suclg12	5.53781e-11	-0.35792	0.117	0.343	1.00118e-06	2_uninjured_vs_2_injured_3day		Endoneurial fibroblasts
Mrpl342	5.62595e-11	-0.417623	0.067	0.249	1.01711e-06	2_uninjured_vs_2_injured_3day		Endoneurial fibroblasts
Samd81	5.73985e-11	-0.356417	0.036	0.188	1.03771e-06	2_uninjured_vs_2_injured_3day		Endoneurial fibroblasts
Mrpl132	5.87259e-11	-0.415851	0.144	0.382	1.06171e-06	2_uninjured_vs_2_injured_3day		Endoneurial fibroblasts
D17H6S56E-52	5.87625e-11	-0.449532	0.005	0.113	1.06237e-06	2_uninjured_vs_2_injured_3day		Endoneurial fibroblasts
Il1rap	5.91351e-11	-0.255644	0.014	0.139	1.0691e-06	2_uninjured_vs_2_injured_3day		Endoneurial fibroblasts
B230369F24Rik4	5.93542e-11	-0.270229	0.012	0.133	1.07306e-06	2_uninjured_vs_2_injured_3day		Endoneurial fibroblasts
1110008F13Rik2	5.94935e-11	-0.44488	0.132	0.362	1.07558e-06	2_uninjured_vs_2_injured_3day		Endoneurial fibroblasts
Erp293	6.03255e-11	-0.550866	0.328	0.621	1.09062e-06	2_uninjured_vs_2_injured_3day		Endoneurial fibroblasts
Tpi12	6.12119e-11	-0.532522	0.239	0.515	1.10665e-06	2_uninjured_vs_2_injured_3day		Endoneurial fibroblasts
Zzef11	6.14709e-11	-0.505226	0.038	0.194	1.11133e-06	2_uninjured_vs_2_injured_3day		Endoneurial fibroblasts
Lpgat12	6.22224e-11	-0.333363	0.086	0.288	1.12492e-06	2_uninjured_vs_2_injured_3day		Endoneurial fibroblasts
Slmap	6.46976e-11	-0.486853	0.105	0.32	1.16967e-06	2_uninjured_vs_2_injured_3day		Endoneurial fibroblasts
Lpcat33	6.58931e-11	-0.374305	0.048	0.214	1.19128e-06	2_uninjured_vs_2_injured_3day		Endoneurial fibroblasts
Hnrnpm2	6.61163e-11	-0.564848	0.292	0.573	1.19532e-06	2_uninjured_vs_2_injured_3day		Endoneurial fibroblasts
Ltbp33	6.69562e-11	-0.360184	0.127	0.353	1.2105e-06	2_uninjured_vs_2_injured_3day		Endoneurial fibroblasts
Agpat32	6.69759e-11	-0.342597	0.117	0.343	1.21086e-06	2_uninjured_vs_2_injured_3day		Endoneurial fibroblasts
Arnt2	6.70344e-11	-0.275188	0.053	0.223	1.21192e-06	2_uninjured_vs_2_injured_3day		Endoneurial fibroblasts
Ptpn141	7.02972e-11	-0.259265	0.024	0.162	1.2709e-06	2_uninjured_vs_2_injured_3day		Endoneurial fibroblasts
Reep52	7.14229e-11	-0.53091	0.462	0.725	1.29126e-06	2_uninjured_vs_2_injured_3day		Endoneurial fibroblasts
Naa15	7.41122e-11	-0.274964	0.148	0.392	1.33987e-06	2_uninjured_vs_2_injured_3day		Endoneurial fibroblasts
Sdcbp4	7.5599e-11	-0.371249	0.249	0.54	1.36675e-06	2_uninjured_vs_2_injured_3day		Endoneurial fibroblasts
Mettl92	7.91233e-11	-0.375485	0.129	0.362	1.43047e-06	2_uninjured_vs_2_injured_3day		Endoneurial fibroblasts
Vasn3	8.31517e-11	-0.326071	0.019	0.149	1.5033e-06	2_uninjured_vs_2_injured_3day		Endoneurial fibroblasts
Prkx	8.34849e-11	-0.277661	0.041	0.197	1.50932e-06	2_uninjured_vs_2_injured_3day		Endoneurial fibroblasts
Plk25	8.43795e-11	-0.315559	0.067	0.249	1.5255e-06	2_uninjured_vs_2_injured_3day		Endoneurial fibroblasts
Eif4e22	8.44611e-11	-0.593389	0.156	0.395	1.52697e-06	2_uninjured_vs_2_injured_3day		Endoneurial fibroblasts
Prkcd	8.53975e-11	-0.291132	0.055	0.227	1.5439e-06	2_uninjured_vs_2_injured_3day		Endoneurial fibroblasts
Gm48253	8.62445e-11	-0.453073	0.019	0.149	1.55921e-06	2_uninjured_vs_2_injured_3day		Endoneurial fibroblasts
Plin21	8.6912e-11	-0.314056	0.079	0.272	1.57128e-06	2_uninjured_vs_2_injured_3day		Endoneurial fibroblasts
Brd31	8.77506e-11	-0.511471	0.132	0.356	1.58644e-06	2_uninjured_vs_2_injured_3day		Endoneurial fibroblasts
Emg1	8.79884e-11	-0.316963	0.108	0.324	1.59074e-06	2_uninjured_vs_2_injured_3day		Endoneurial fibroblasts
Cox6b12	8.86087e-11	-0.580978	0.447	0.715	1.60196e-06	2_uninjured_vs_2_injured_3day		Endoneurial fibroblasts
2310045N01Rik3	9.06068e-11	-0.280647	0.055	0.227	1.63808e-06	2_uninjured_vs_2_injured_3day		Endoneurial fibroblasts
Cd3024	9.11599e-11	0.8301	0.656	0.608	1.64808e-06	2_uninjured_vs_2_injured_3day		Endoneurial fibroblasts
Tmem184b1	9.18477e-11	-0.313543	0.057	0.23	1.66051e-06	2_uninjured_vs_2_injured_3day		Endoneurial fibroblasts
Top2a2	9.56538e-11	-0.787816	0.002	0.104	1.72932e-06	2_uninjured_vs_2_injured_3day		Endoneurial fibroblasts
Rnf112	9.76196e-11	-0.404468	0.112	0.33	1.76487e-06	2_uninjured_vs_2_injured_3day		Endoneurial fibroblasts
Cenpf2	1.00145e-10	-0.409931	0.002	0.104	1.81052e-06	2_uninjured_vs_2_injured_3day		Endoneurial fibroblasts
Sugt13	1.00293e-10	-0.283047	0.134	0.372	1.8132e-06	2_uninjured_vs_2_injured_3day		Endoneurial fibroblasts
Bloc1s22	1.00381e-10	-0.29671	0.057	0.23	1.8148e-06	2_uninjured_vs_2_injured_3day		Endoneurial fibroblasts
Fdft1	1.00832e-10	0.930637	0.215	0.049	1.82295e-06	2_uninjured_vs_2_injured_3day		Endoneurial fibroblasts
Fkbp34	1.03512e-10	-0.429567	0.179	0.437	1.87139e-06	2_uninjured_vs_2_injured_3day		Endoneurial fibroblasts
Topbp12	1.07244e-10	-0.250926	0.017	0.142	1.93886e-06	2_uninjured_vs_2_injured_3day		Endoneurial fibroblasts
Ubr4	1.08565e-10	-0.290996	0.043	0.201	1.96274e-06	2_uninjured_vs_2_injured_3day		Endoneurial fibroblasts
Fhod1	1.09008e-10	-0.3088	0.014	0.136	1.97076e-06	2_uninjured_vs_2_injured_3day		Endoneurial fibroblasts
Npepps1	1.10352e-10	-0.509013	0.167	0.424	1.99505e-06	2_uninjured_vs_2_injured_3day		Endoneurial fibroblasts
Foxc2	1.11599e-10	-0.406579	0.096	0.301	2.0176e-06	2_uninjured_vs_2_injured_3day		Endoneurial fibroblasts
Ube2j23	1.13405e-10	-0.32826	0.074	0.262	2.05025e-06	2_uninjured_vs_2_injured_3day		Endoneurial fibroblasts
Zc3h183	1.14653e-10	-0.323765	0.057	0.23	2.07282e-06	2_uninjured_vs_2_injured_3day		Endoneurial fibroblasts
Nbr12	1.14776e-10	-0.314444	0.089	0.288	2.07504e-06	2_uninjured_vs_2_injured_3day		Endoneurial fibroblasts
AI837181	1.15203e-10	-0.292063	0.048	0.21	2.08275e-06	2_uninjured_vs_2_injured_3day		Endoneurial fibroblasts
Pik3r3	1.17601e-10	-0.481454	0.012	0.129	2.12611e-06	2_uninjured_vs_2_injured_3day		Endoneurial fibroblasts
Ndrg4	1.20318e-10	-0.286035	0.041	0.194	2.17523e-06	2_uninjured_vs_2_injured_3day		Endoneurial fibroblasts
Stk40	1.2205e-10	-0.293291	0.072	0.256	2.20654e-06	2_uninjured_vs_2_injured_3day		Endoneurial fibroblasts
Trim352	1.2557e-10	-0.290956	0.081	0.275	2.27018e-06	2_uninjured_vs_2_injured_3day		Endoneurial fibroblasts
Gm107844	1.26897e-10	-0.250937	0.043	0.201	2.29418e-06	2_uninjured_vs_2_injured_3day		Endoneurial fibroblasts
Ppia4	1.27733e-10	-0.456952	0.117	0.333	2.30928e-06	2_uninjured_vs_2_injured_3day		Endoneurial fibroblasts
Tor1aip21	1.29492e-10	-0.269617	0.11	0.327	2.34109e-06	2_uninjured_vs_2_injured_3day		Endoneurial fibroblasts
Gm57862	1.31618e-10	-0.266115	0.012	0.129	2.37952e-06	2_uninjured_vs_2_injured_3day		Endoneurial fibroblasts
Fgfrl1	1.32156e-10	-0.28297	0.072	0.259	2.38925e-06	2_uninjured_vs_2_injured_3day		Endoneurial fibroblasts
Cnot61	1.36612e-10	-0.410509	0.115	0.33	2.46981e-06	2_uninjured_vs_2_injured_3day		Endoneurial fibroblasts
Dnajc5	1.37262e-10	-0.313903	0.122	0.346	2.48157e-06	2_uninjured_vs_2_injured_3day		Endoneurial fibroblasts
Svil5	1.38145e-10	-0.418633	0.096	0.298	2.49753e-06	2_uninjured_vs_2_injured_3day		Endoneurial fibroblasts
Pdlim52	1.39041e-10	-0.401353	0.045	0.204	2.51373e-06	2_uninjured_vs_2_injured_3day		Endoneurial fibroblasts
Mogs1	1.4096e-10	-0.33509	0.041	0.194	2.54841e-06	2_uninjured_vs_2_injured_3day		Endoneurial fibroblasts
Ganab3	1.41354e-10	-0.308063	0.124	0.35	2.55555e-06	2_uninjured_vs_2_injured_3day		Endoneurial fibroblasts
Nedd82	1.42009e-10	-0.490567	0.294	0.583	2.56738e-06	2_uninjured_vs_2_injured_3day		Endoneurial fibroblasts
Angptl12	1.42328e-10	1.18638	0.27	0.1	2.57314e-06	2_uninjured_vs_2_injured_3day		Endoneurial fibroblasts
Rps165	1.43535e-10	-0.524685	0.306	0.602	2.59497e-06	2_uninjured_vs_2_injured_3day		Endoneurial fibroblasts
Naa101	1.50141e-10	-0.319263	0.045	0.204	2.7144e-06	2_uninjured_vs_2_injured_3day		Endoneurial fibroblasts
Vps293	1.52136e-10	-0.308048	0.146	0.385	2.75047e-06	2_uninjured_vs_2_injured_3day		Endoneurial fibroblasts
Btbd12	1.54944e-10	-0.2906	0.112	0.333	2.80123e-06	2_uninjured_vs_2_injured_3day		Endoneurial fibroblasts
Mrps71	1.55007e-10	-0.330503	0.055	0.223	2.80238e-06	2_uninjured_vs_2_injured_3day		Endoneurial fibroblasts
Rnf165	1.58877e-10	-0.299916	0.019	0.146	2.87233e-06	2_uninjured_vs_2_injured_3day		Endoneurial fibroblasts
C1qbp1	1.58906e-10	-0.29387	0.1	0.307	2.87285e-06	2_uninjured_vs_2_injured_3day		Endoneurial fibroblasts
Sipa1l3	1.61787e-10	-0.298678	0.019	0.146	2.92495e-06	2_uninjured_vs_2_injured_3day		Endoneurial fibroblasts
G0s2	1.66764e-10	1.12175	0.292	0.117	3.01493e-06	2_uninjured_vs_2_injured_3day		Endoneurial fibroblasts
Galnt12	1.67332e-10	-0.323797	0.019	0.146	3.0252e-06	2_uninjured_vs_2_injured_3day		Endoneurial fibroblasts
Trappc44	1.69937e-10	-0.380803	0.148	0.379	3.0723e-06	2_uninjured_vs_2_injured_3day		Endoneurial fibroblasts
Lipa5	1.70374e-10	-0.299029	0.091	0.288	3.0802e-06	2_uninjured_vs_2_injured_3day		Endoneurial fibroblasts
Syn33	1.72506e-10	-0.626121	0.105	0.304	3.11873e-06	2_uninjured_vs_2_injured_3day		Endoneurial fibroblasts
Esf14	1.73219e-10	-0.445065	0.108	0.314	3.13162e-06	2_uninjured_vs_2_injured_3day		Endoneurial fibroblasts
Eif3j24	1.82116e-10	-0.331352	0.098	0.301	3.29248e-06	2_uninjured_vs_2_injured_3day		Endoneurial fibroblasts
Sh3pxd2a2	1.86421e-10	-0.331665	0.187	0.443	3.37031e-06	2_uninjured_vs_2_injured_3day		Endoneurial fibroblasts
Srsf93	1.99966e-10	-0.354972	0.141	0.375	3.61519e-06	2_uninjured_vs_2_injured_3day		Endoneurial fibroblasts
Arfgef2	2.10188e-10	-0.362307	0.029	0.165	3.8e-06	2_uninjured_vs_2_injured_3day		Endoneurial fibroblasts
Cpsf24	2.10725e-10	-0.288868	0.084	0.275	3.80969e-06	2_uninjured_vs_2_injured_3day		Endoneurial fibroblasts
Gm54221	2.11205e-10	-0.324721	0.024	0.155	3.81838e-06	2_uninjured_vs_2_injured_3day		Endoneurial fibroblasts
Arpc43	2.22638e-10	-0.430205	0.17	0.421	4.02508e-06	2_uninjured_vs_2_injured_3day		Endoneurial fibroblasts
Epyc	2.28238e-10	-0.950932	0.16	0.375	4.12631e-06	2_uninjured_vs_2_injured_3day		Endoneurial fibroblasts
Yaf22	2.30549e-10	-0.327721	0.069	0.246	4.1681e-06	2_uninjured_vs_2_injured_3day		Endoneurial fibroblasts
Hist1h2bc2	2.31216e-10	-0.390876	0.057	0.223	4.18016e-06	2_uninjured_vs_2_injured_3day		Endoneurial fibroblasts
Runx13	2.35616e-10	-0.344168	0.062	0.233	4.2597e-06	2_uninjured_vs_2_injured_3day		Endoneurial fibroblasts
Tstd3	2.35684e-10	-0.263229	0.026	0.162	4.26093e-06	2_uninjured_vs_2_injured_3day		Endoneurial fibroblasts
Clec3b2	2.38961e-10	1.46267	0.316	0.142	4.32017e-06	2_uninjured_vs_2_injured_3day		Endoneurial fibroblasts
Tram22	2.39603e-10	-0.276916	0.05	0.21	4.33178e-06	2_uninjured_vs_2_injured_3day		Endoneurial fibroblasts
Msn4	2.40593e-10	-0.398043	0.215	0.485	4.34968e-06	2_uninjured_vs_2_injured_3day		Endoneurial fibroblasts
Eef24	2.46229e-10	-0.560228	0.541	0.767	4.45157e-06	2_uninjured_vs_2_injured_3day		Endoneurial fibroblasts
Zbed3	2.47128e-10	-0.281434	0.036	0.181	4.46782e-06	2_uninjured_vs_2_injured_3day		Endoneurial fibroblasts
Pdia52	2.48337e-10	-0.33775	0.148	0.382	4.48969e-06	2_uninjured_vs_2_injured_3day		Endoneurial fibroblasts
Mpeg1	2.48364e-10	-0.302053	0.005	0.107	4.49017e-06	2_uninjured_vs_2_injured_3day		Endoneurial fibroblasts
Wsb21	2.48582e-10	-0.361965	0.072	0.252	4.49412e-06	2_uninjured_vs_2_injured_3day		Endoneurial fibroblasts
Prkcsh5	2.50221e-10	-0.511131	0.254	0.544	4.52374e-06	2_uninjured_vs_2_injured_3day		Endoneurial fibroblasts
Stk382	2.50635e-10	-0.380207	0.127	0.343	4.53123e-06	2_uninjured_vs_2_injured_3day		Endoneurial fibroblasts
Txndc91	2.5442e-10	-0.476326	0.122	0.34	4.59965e-06	2_uninjured_vs_2_injured_3day		Endoneurial fibroblasts
Tcp13	2.56553e-10	-0.304128	0.172	0.424	4.63822e-06	2_uninjured_vs_2_injured_3day		Endoneurial fibroblasts
Rpl7a-ps82	2.59447e-10	-0.333241	0.005	0.107	4.69055e-06	2_uninjured_vs_2_injured_3day		Endoneurial fibroblasts
Pbxip12	2.59885e-10	-0.32946	0.175	0.424	4.69846e-06	2_uninjured_vs_2_injured_3day		Endoneurial fibroblasts
Rhoj5	2.65782e-10	1.04676	0.569	0.472	4.80508e-06	2_uninjured_vs_2_injured_3day		Endoneurial fibroblasts
Mesdc1	2.67527e-10	-0.323044	0.022	0.149	4.83662e-06	2_uninjured_vs_2_injured_3day		Endoneurial fibroblasts
B4galt2	2.70017e-10	-0.294807	0.041	0.191	4.88164e-06	2_uninjured_vs_2_injured_3day		Endoneurial fibroblasts
Akt13	2.77334e-10	-0.30419	0.086	0.275	5.01393e-06	2_uninjured_vs_2_injured_3day		Endoneurial fibroblasts
Epb4.1l1	2.79379e-10	-0.350748	0.144	0.379	5.05089e-06	2_uninjured_vs_2_injured_3day		Endoneurial fibroblasts
Dut2	2.82508e-10	-0.448803	0.069	0.243	5.10746e-06	2_uninjured_vs_2_injured_3day		Endoneurial fibroblasts
Nckap12	2.83685e-10	-0.275185	0.1	0.304	5.12873e-06	2_uninjured_vs_2_injured_3day		Endoneurial fibroblasts
Scarb21	3.02422e-10	-0.315512	0.033	0.175	5.46749e-06	2_uninjured_vs_2_injured_3day		Endoneurial fibroblasts
Prrc2a3	3.03924e-10	-0.416533	0.079	0.262	5.49464e-06	2_uninjured_vs_2_injured_3day		Endoneurial fibroblasts
Ly6a5	3.14765e-10	-0.555355	0.311	0.595	5.69063e-06	2_uninjured_vs_2_injured_3day		Endoneurial fibroblasts
Pip5k1a	3.20442e-10	-0.364584	0.057	0.223	5.79328e-06	2_uninjured_vs_2_injured_3day		Endoneurial fibroblasts
Dcbld1	3.22231e-10	-0.254466	0.022	0.149	5.82561e-06	2_uninjured_vs_2_injured_3day		Endoneurial fibroblasts
Ipo4	3.37131e-10	-0.38408	0.05	0.207	6.095e-06	2_uninjured_vs_2_injured_3day		Endoneurial fibroblasts
Lrrc422	3.38465e-10	-0.286896	0.043	0.194	6.11911e-06	2_uninjured_vs_2_injured_3day		Endoneurial fibroblasts
Dnajc153	3.50651e-10	-0.336337	0.033	0.175	6.33942e-06	2_uninjured_vs_2_injured_3day		Endoneurial fibroblasts
Lbh2	3.53839e-10	-0.542795	0.124	0.333	6.39706e-06	2_uninjured_vs_2_injured_3day		Endoneurial fibroblasts
Rad502	3.57748e-10	-0.262299	0.055	0.22	6.46772e-06	2_uninjured_vs_2_injured_3day		Endoneurial fibroblasts
Cul4a2	3.58773e-10	-0.284228	0.077	0.262	6.48626e-06	2_uninjured_vs_2_injured_3day		Endoneurial fibroblasts
Etl43	3.6363e-10	-0.265417	0.033	0.175	6.57407e-06	2_uninjured_vs_2_injured_3day		Endoneurial fibroblasts
Gxylt14	3.66067e-10	-0.294729	0.072	0.249	6.61812e-06	2_uninjured_vs_2_injured_3day		Endoneurial fibroblasts
Dbn12	3.69811e-10	-0.307828	0.089	0.282	6.68582e-06	2_uninjured_vs_2_injured_3day		Endoneurial fibroblasts
Arf32	3.7037e-10	-0.377844	0.065	0.233	6.69591e-06	2_uninjured_vs_2_injured_3day		Endoneurial fibroblasts
Plcb3	3.75962e-10	-0.329379	0.031	0.168	6.79702e-06	2_uninjured_vs_2_injured_3day		Endoneurial fibroblasts
Anp32e1	3.84942e-10	-0.270507	0.108	0.314	6.95937e-06	2_uninjured_vs_2_injured_3day		Endoneurial fibroblasts
Gnl12	3.89308e-10	-0.432127	0.05	0.207	7.03829e-06	2_uninjured_vs_2_injured_3day		Endoneurial fibroblasts
Mrpl174	3.89976e-10	-0.373378	0.165	0.405	7.05037e-06	2_uninjured_vs_2_injured_3day		Endoneurial fibroblasts
Rhoc4	3.9009e-10	-0.406757	0.321	0.608	7.05243e-06	2_uninjured_vs_2_injured_3day		Endoneurial fibroblasts
Rps27a3	3.91117e-10	-0.316176	0.079	0.262	7.071e-06	2_uninjured_vs_2_injured_3day		Endoneurial fibroblasts
Irgq	3.96665e-10	-0.302369	0.017	0.136	7.1713e-06	2_uninjured_vs_2_injured_3day		Endoneurial fibroblasts
Osr22	3.99552e-10	1.32988	0.55	0.463	7.22349e-06	2_uninjured_vs_2_injured_3day		Endoneurial fibroblasts
Gm81864	4.02019e-10	-0.426234	0.16	0.405	7.2681e-06	2_uninjured_vs_2_injured_3day		Endoneurial fibroblasts
Ndufb73	4.11504e-10	-0.395117	0.237	0.511	7.43958e-06	2_uninjured_vs_2_injured_3day		Endoneurial fibroblasts
Snrpb24	4.11636e-10	-0.341097	0.112	0.324	7.44196e-06	2_uninjured_vs_2_injured_3day		Endoneurial fibroblasts
Acyp1	4.22043e-10	-0.30184	0.031	0.168	7.63011e-06	2_uninjured_vs_2_injured_3day		Endoneurial fibroblasts
Dner	4.24145e-10	-0.48067	0.012	0.123	7.66812e-06	2_uninjured_vs_2_injured_3day		Endoneurial fibroblasts
Cdc42ep5	4.26637e-10	-0.369054	0.098	0.298	7.71318e-06	2_uninjured_vs_2_injured_3day		Endoneurial fibroblasts
Elp2	4.30982e-10	-0.453953	0.079	0.259	7.79173e-06	2_uninjured_vs_2_injured_3day		Endoneurial fibroblasts
Zfp532	4.35904e-10	-0.288243	0.031	0.168	7.88071e-06	2_uninjured_vs_2_injured_3day		Endoneurial fibroblasts
Spr4	4.36109e-10	-0.325729	0.091	0.282	7.88442e-06	2_uninjured_vs_2_injured_3day		Endoneurial fibroblasts
Srp192	4.5077e-10	-0.537496	0.316	0.586	8.14947e-06	2_uninjured_vs_2_injured_3day		Endoneurial fibroblasts
Sec61b5	4.54387e-10	-0.604536	0.502	0.728	8.21486e-06	2_uninjured_vs_2_injured_3day		Endoneurial fibroblasts
Tmsb104	4.7443e-10	-0.659047	0.627	0.796	8.57721e-06	2_uninjured_vs_2_injured_3day		Endoneurial fibroblasts
Chd12	4.93124e-10	-0.429995	0.081	0.262	8.91518e-06	2_uninjured_vs_2_injured_3day		Endoneurial fibroblasts
Nbl11	4.93567e-10	-0.319975	0.127	0.343	8.9232e-06	2_uninjured_vs_2_injured_3day		Endoneurial fibroblasts
Psme14	4.97339e-10	-0.372878	0.134	0.356	8.99139e-06	2_uninjured_vs_2_injured_3day		Endoneurial fibroblasts
Cdkn2a	5.12653e-10	-0.757854	0.335	0.583	9.26826e-06	2_uninjured_vs_2_injured_3day		Endoneurial fibroblasts
Mon2	5.16219e-10	-0.453288	0.067	0.236	9.33273e-06	2_uninjured_vs_2_injured_3day		Endoneurial fibroblasts
Sar1a3	5.20343e-10	-0.456132	0.388	0.693	9.40728e-06	2_uninjured_vs_2_injured_3day		Endoneurial fibroblasts
Dync1li12	5.23823e-10	-0.625503	0.074	0.249	9.4702e-06	2_uninjured_vs_2_injured_3day		Endoneurial fibroblasts
1500009L16Rik	5.26122e-10	-0.336111	0.089	0.275	9.51176e-06	2_uninjured_vs_2_injured_3day		Endoneurial fibroblasts
Traf42	5.39263e-10	-0.343413	0.091	0.285	9.74934e-06	2_uninjured_vs_2_injured_3day		Endoneurial fibroblasts
Ddr22	5.43275e-10	-0.515638	0.196	0.434	9.82187e-06	2_uninjured_vs_2_injured_3day		Endoneurial fibroblasts
Nr2f22	5.45447e-10	-0.586758	0.388	0.654	9.86113e-06	2_uninjured_vs_2_injured_3day		Endoneurial fibroblasts
Ttc34	5.61418e-10	-0.256868	0.309	0.602	1.01499e-05	2_uninjured_vs_2_injured_3day		Endoneurial fibroblasts
Pbx2	5.62042e-10	-0.372111	0.029	0.162	1.01612e-05	2_uninjured_vs_2_injured_3day		Endoneurial fibroblasts
Eif3l2	5.64145e-10	-0.392371	0.122	0.34	1.01992e-05	2_uninjured_vs_2_injured_3day		Endoneurial fibroblasts
Extl3	5.67846e-10	-0.277322	0.091	0.285	1.02661e-05	2_uninjured_vs_2_injured_3day		Endoneurial fibroblasts
Dlst1	5.75344e-10	-0.261972	0.065	0.236	1.04016e-05	2_uninjured_vs_2_injured_3day		Endoneurial fibroblasts
Luc7l34	5.75879e-10	-0.483027	0.254	0.534	1.04113e-05	2_uninjured_vs_2_injured_3day		Endoneurial fibroblasts
Clic43	5.80507e-10	-0.440381	0.23	0.485	1.0495e-05	2_uninjured_vs_2_injured_3day		Endoneurial fibroblasts
Cdk45	5.86511e-10	-0.310952	0.254	0.534	1.06035e-05	2_uninjured_vs_2_injured_3day		Endoneurial fibroblasts
Mycbp3	6.14946e-10	-0.267644	0.045	0.197	1.11176e-05	2_uninjured_vs_2_injured_3day		Endoneurial fibroblasts
Mrps122	6.19298e-10	-0.335314	0.081	0.265	1.11963e-05	2_uninjured_vs_2_injured_3day		Endoneurial fibroblasts
Impad12	6.37461e-10	-0.388157	0.158	0.392	1.15247e-05	2_uninjured_vs_2_injured_3day		Endoneurial fibroblasts
Pgk12	6.41952e-10	-0.511483	0.048	0.197	1.16058e-05	2_uninjured_vs_2_injured_3day		Endoneurial fibroblasts
Zwint	6.63237e-10	-0.329989	0.057	0.22	1.19907e-05	2_uninjured_vs_2_injured_3day		Endoneurial fibroblasts
4930402H24Rik2	6.68441e-10	-0.390394	0.1	0.298	1.20847e-05	2_uninjured_vs_2_injured_3day		Endoneurial fibroblasts
Pxdc11	6.78994e-10	-0.297535	0.057	0.22	1.22755e-05	2_uninjured_vs_2_injured_3day		Endoneurial fibroblasts
Snx54	7.0044e-10	-0.402504	0.086	0.272	1.26633e-05	2_uninjured_vs_2_injured_3day		Endoneurial fibroblasts
Khdrbs15	7.06622e-10	-0.361932	0.218	0.489	1.2775e-05	2_uninjured_vs_2_injured_3day		Endoneurial fibroblasts
4931406P16Rik2	7.17051e-10	-0.27765	0.069	0.243	1.29636e-05	2_uninjured_vs_2_injured_3day		Endoneurial fibroblasts
Snhg33	7.25333e-10	-0.296949	0.084	0.272	1.31133e-05	2_uninjured_vs_2_injured_3day		Endoneurial fibroblasts
Ubl54	7.29363e-10	-0.506103	0.313	0.599	1.31862e-05	2_uninjured_vs_2_injured_3day		Endoneurial fibroblasts
Cox7a2l3	7.47664e-10	-0.536842	0.268	0.537	1.3517e-05	2_uninjured_vs_2_injured_3day		Endoneurial fibroblasts
Kdm5c2	7.52105e-10	-0.357122	0.06	0.223	1.35973e-05	2_uninjured_vs_2_injured_3day		Endoneurial fibroblasts
Cops23	7.55342e-10	-0.290021	0.134	0.353	1.36558e-05	2_uninjured_vs_2_injured_3day		Endoneurial fibroblasts
Ywhah4	7.58397e-10	-0.357659	0.129	0.346	1.37111e-05	2_uninjured_vs_2_injured_3day		Endoneurial fibroblasts
Zeb12	7.82808e-10	-0.461581	0.172	0.417	1.41524e-05	2_uninjured_vs_2_injured_3day		Endoneurial fibroblasts
Cnpy4	7.88166e-10	-0.259832	0.127	0.343	1.42492e-05	2_uninjured_vs_2_injured_3day		Endoneurial fibroblasts
Llgl12	8.07978e-10	-0.276009	0.024	0.149	1.46074e-05	2_uninjured_vs_2_injured_3day		Endoneurial fibroblasts
Atp9a	8.14216e-10	-0.262515	0.096	0.288	1.47202e-05	2_uninjured_vs_2_injured_3day		Endoneurial fibroblasts
Syncrip3	8.24954e-10	-0.43558	0.189	0.43	1.49143e-05	2_uninjured_vs_2_injured_3day		Endoneurial fibroblasts
Arl6ip42	8.30927e-10	-0.321425	0.084	0.269	1.50223e-05	2_uninjured_vs_2_injured_3day		Endoneurial fibroblasts
Vdac12	8.41271e-10	-0.40556	0.215	0.479	1.52093e-05	2_uninjured_vs_2_injured_3day		Endoneurial fibroblasts
Atox12	8.4291e-10	-0.506862	0.397	0.667	1.5239e-05	2_uninjured_vs_2_injured_3day		Endoneurial fibroblasts
Prdx62	8.45282e-10	-0.319782	0.158	0.398	1.52819e-05	2_uninjured_vs_2_injured_3day		Endoneurial fibroblasts
Cadm4	8.95256e-10	-0.339024	0.096	0.282	1.61853e-05	2_uninjured_vs_2_injured_3day		Endoneurial fibroblasts
Gm165192	8.99176e-10	-0.533	0.014	0.126	1.62562e-05	2_uninjured_vs_2_injured_3day		Endoneurial fibroblasts
Enc11	9.10582e-10	-0.491225	0.022	0.142	1.64624e-05	2_uninjured_vs_2_injured_3day		Endoneurial fibroblasts
Dact31	9.28112e-10	-0.416746	0.012	0.12	1.67793e-05	2_uninjured_vs_2_injured_3day		Endoneurial fibroblasts
Hectd1	9.33815e-10	-0.465793	0.122	0.333	1.68824e-05	2_uninjured_vs_2_injured_3day		Endoneurial fibroblasts
Ghitm2	9.38085e-10	-0.557445	0.211	0.472	1.69596e-05	2_uninjured_vs_2_injured_3day		Endoneurial fibroblasts
Pcdh192	9.437e-10	-0.36882	0.014	0.126	1.70611e-05	2_uninjured_vs_2_injured_3day		Endoneurial fibroblasts
Ykt63	9.44404e-10	-0.37482	0.12	0.324	1.70739e-05	2_uninjured_vs_2_injured_3day		Endoneurial fibroblasts
Gatad1	9.5106e-10	-0.299726	0.134	0.356	1.71942e-05	2_uninjured_vs_2_injured_3day		Endoneurial fibroblasts
Slc25a34	9.69868e-10	-0.567595	0.447	0.706	1.75342e-05	2_uninjured_vs_2_injured_3day		Endoneurial fibroblasts
Coa5	9.7994e-10	-0.259536	0.041	0.184	1.77163e-05	2_uninjured_vs_2_injured_3day		Endoneurial fibroblasts
Bcat12	1.00694e-09	-0.253407	0.057	0.217	1.82045e-05	2_uninjured_vs_2_injured_3day		Endoneurial fibroblasts
Rcn13	1.01272e-09	-0.518249	0.486	0.751	1.8309e-05	2_uninjured_vs_2_injured_3day		Endoneurial fibroblasts
Gramd1a2	1.02274e-09	-0.286255	0.057	0.217	1.84902e-05	2_uninjured_vs_2_injured_3day		Endoneurial fibroblasts
Ptpn122	1.03801e-09	-0.37866	0.115	0.317	1.87662e-05	2_uninjured_vs_2_injured_3day		Endoneurial fibroblasts
Serf13	1.04465e-09	-0.49213	0.148	0.366	1.88863e-05	2_uninjured_vs_2_injured_3day		Endoneurial fibroblasts
Tmem198b1	1.06608e-09	-0.32825	0.086	0.269	1.92736e-05	2_uninjured_vs_2_injured_3day		Endoneurial fibroblasts
Kif1c1	1.08435e-09	-0.361152	0.029	0.159	1.9604e-05	2_uninjured_vs_2_injured_3day		Endoneurial fibroblasts
Maz	1.10995e-09	-0.469425	0.043	0.188	2.00667e-05	2_uninjured_vs_2_injured_3day		Endoneurial fibroblasts
Xpnpep13	1.14735e-09	-0.447174	0.069	0.236	2.0743e-05	2_uninjured_vs_2_injured_3day		Endoneurial fibroblasts
Ssr11	1.17378e-09	-0.37005	0.309	0.602	2.12208e-05	2_uninjured_vs_2_injured_3day		Endoneurial fibroblasts
Nupr12	1.1823e-09	1.08418	0.574	0.476	2.13749e-05	2_uninjured_vs_2_injured_3day		Endoneurial fibroblasts
Ubxn81	1.1898e-09	-0.338894	0.029	0.159	2.15105e-05	2_uninjured_vs_2_injured_3day		Endoneurial fibroblasts
Gm97902	1.22372e-09	-0.296618	0.033	0.168	2.21237e-05	2_uninjured_vs_2_injured_3day		Endoneurial fibroblasts
Prmt12	1.24051e-09	-0.315739	0.129	0.343	2.24271e-05	2_uninjured_vs_2_injured_3day		Endoneurial fibroblasts
Agt	1.2971e-09	-0.304002	0.019	0.136	2.34503e-05	2_uninjured_vs_2_injured_3day		Endoneurial fibroblasts
Atp5j21	1.30559e-09	-0.551457	0.457	0.689	2.36038e-05	2_uninjured_vs_2_injured_3day		Endoneurial fibroblasts
Atrx3	1.31517e-09	-0.439654	0.297	0.576	2.37769e-05	2_uninjured_vs_2_injured_3day		Endoneurial fibroblasts
Eea12	1.32036e-09	-0.294206	0.103	0.298	2.38708e-05	2_uninjured_vs_2_injured_3day		Endoneurial fibroblasts
Agpat1	1.3244e-09	-0.398919	0.05	0.201	2.39438e-05	2_uninjured_vs_2_injured_3day		Endoneurial fibroblasts
Uqcrc21	1.38161e-09	-0.307878	0.136	0.35	2.49781e-05	2_uninjured_vs_2_injured_3day		Endoneurial fibroblasts
Ubqln2	1.43154e-09	-0.372743	0.057	0.214	2.58809e-05	2_uninjured_vs_2_injured_3day		Endoneurial fibroblasts
Zc3h154	1.46815e-09	-0.390443	0.254	0.528	2.65426e-05	2_uninjured_vs_2_injured_3day		Endoneurial fibroblasts
[truncated: 1,411 more rows]

## Sheet: Schwann cells
	p_val	avg_log2FC	pct.1	pct.2	p_val_adj	comparison
[truncated: 4,587 more rows]

[truncated: 6 more sheets: Epineurial fibroblasts, Macrophages, B cells, Perineurial cells, Pericytes, VSM]
