# Supplementary material for: Single Cell Transcriptome Data Analysis Defines the Heterogeneity of Peripheral Nerve Cells in Homeostasis and Regeneration
Source: Front Cell Neurosci. 2021 Mar 22;15:624826. doi: 10.3389/fncel.2021.624826 (PMC8019921; doi:10.3389/fncel.2021.624826)
Supplement: Supplementary file 6 [file Data_Sheet_2.CSV]

	p_val	avg_logFC	pct.1	pct.2	p_val_adj	cluster	gene
Cp	1.89530267273603e-265	1.92209872010397	0.963	0.171	2.6249942017394e-261	0	Cp
Enpp2	3.02503499079596e-247	1.12711685040519	0.796	0.054	4.18967346225241e-243	0	Enpp2
Lum	1.82608438144125e-227	2.25821940308507	0.986	0.389	2.52912686829613e-223	0	Lum
Smoc2	3.09033988748318e-227	1.81793493104902	0.97	0.251	4.2801207441642e-223	0	Smoc2
Apod	6.53872779497576e-216	3.16291026918351	0.998	0.773	9.05613799604142e-212	0	Apod
Crispld2	4.10559288800472e-213	1.48197855721974	0.86	0.152	5.68624614988654e-209	0	Crispld2
Gpc3	7.75552848312076e-212	1.70198578814955	0.977	0.323	1.07414069491222e-207	0	Gpc3
Col15a1	1.09066470154962e-211	1.40590580008215	0.906	0.205	1.51057061164622e-207	0	Col15a1
Abca6	1.32400849152335e-209	0.917998156671329	0.674	0.036	1.83375176075984e-205	0	Abca6
Ccl11	1.59660637530452e-186	1.12703797516606	0.842	0.151	2.21129982979676e-182	0	Ccl11
Dcn	1.90157376728147e-181	1.69865252788034	1	0.811	2.63367966768484e-177	0	Dcn
Thbs4	1.07858824686082e-180	0.767253776015252	0.663	0.052	1.49384472190224e-176	0	Thbs4
Abca9	4.46921951400803e-167	0.723938187682718	0.656	0.065	6.18986902690113e-163	0	Abca9
Mmp2	1.64872849891508e-161	1.06062512385357	0.92	0.279	2.28348897099738e-157	0	Mmp2
Angptl7	7.85688375931782e-157	1.92340690728639	0.651	0.091	1.08817840066552e-152	0	Angptl7
Cpxm1	9.52853745371023e-156	0.964100528607607	0.773	0.146	1.31970243733887e-151	0	Cpxm1
Osr2	4.08452380895654e-154	0.75144924694352	0.502	0.021	5.6570654754048e-150	0	Osr2
Cpxm2	4.14838201743542e-144	0.691929881755298	0.619	0.069	5.74550909414806e-140	0	Cpxm2
Il33	1.47077568549139e-142	0.774452188527549	0.661	0.098	2.03702432440557e-138	0	Il33
Itm2a	3.67009769008218e-138	0.977884003598919	0.833	0.236	5.08308530076382e-134	0	Itm2a
Sox9	9.79135703431304e-138	0.561823943280416	0.45	0.017	1.35610294925236e-133	0	Sox9
Gfra1	5.19084473718843e-136	0.493378469524551	0.436	0.015	7.18931996100598e-132	0	Gfra1
Lama2	6.55720301644162e-133	0.769383189425557	0.688	0.129	9.08172617777165e-129	0	Lama2
A2m	2.37714139397655e-128	0.513095526267838	0.397	0.009	3.29234083065753e-124	0	A2m
Col1a1	2.07687640837771e-125	0.979384741623591	0.986	0.601	2.87647382560313e-121	0	Col1a1
Rasgrp2	1.62170672130031e-118	0.633274327173987	0.567	0.079	2.24606380900092e-114	0	Rasgrp2
Htra1	4.73068768104443e-117	0.721140629658874	0.766	0.209	6.55200243824654e-113	0	Htra1
Matn2	2.30484959039741e-116	0.731022132988872	0.741	0.174	3.19221668270041e-112	0	Matn2
Col1a2	4.99998267805404e-112	0.875591481583278	0.998	0.726	6.92497600910485e-108	0	Col1a2
Abi3bp	5.69088042823972e-112	0.68005234105737	0.718	0.169	7.88186939311202e-108	0	Abi3bp
Col3a1	3.36145278635621e-106	0.850802318817133	0.998	0.703	4.65561210910335e-102	0	Col3a1
Vit	1.88660639323881e-99	0.53318234234366	0.578	0.111	2.61294985463575e-95	0	Vit
Aebp1	5.44908294472377e-99	0.789337716647874	0.826	0.292	7.54697987844242e-95	0	Aebp1
Cdkn2a	1.75914557553715e-98	0.33504610961567	0.307	0.007	2.43641662211896e-94	0	Cdkn2a
Cdkn2b	2.23181580708107e-98	0.423513129640332	0.356	0.019	3.09106489280728e-94	0	Cdkn2b
Ctsb	3.68963496549231e-94	0.769759526736859	0.872	0.445	5.11014442720685e-90	0	Ctsb
Tmsb4x	4.00678573639001e-92	-1.30441717786547	0.651	0.906	5.54939824490017e-88	0	Tmsb4x
Clcn5	1.36025458236317e-90	0.374662677797403	0.321	0.016	1.883952596573e-86	0	Clcn5
Plxdc1	1.50161485854435e-90	0.353998745755641	0.335	0.019	2.07973657908392e-86	0	Plxdc1
Trf	2.3694485746416e-89	0.757542342798267	0.388	0.041	3.28168627587861e-85	0	Trf
Pdgfra	1.11407003441832e-87	0.552621450938154	0.596	0.141	1.54298699766937e-83	0	Pdgfra
Ecm1	1.58039884351129e-87	0.633367958173424	0.766	0.251	2.18885239826313e-83	0	Ecm1
Serpinf1	5.9153034810825e-87	0.474261475849576	0.876	0.303	8.19269532129926e-83	0	Serpinf1
Tgfbi	4.03261753892281e-86	0.477470233888861	0.67	0.169	5.58517529140809e-82	0	Tgfbi
Ifi30	1.76440660056904e-85	0.388698693402009	0.399	0.046	2.44370314178813e-81	0	Ifi30
Myoc	3.13563774331293e-84	0.64431849944212	0.443	0.064	4.34285827448841e-80	0	Myoc
Oaf	1.83999330825074e-82	0.455312754291585	0.502	0.096	2.54839073192727e-78	0	Oaf
Col6a1	5.22661151870613e-82	0.598795411120094	0.766	0.262	7.23885695340799e-78	0	Col6a1
Efemp1	3.05696884043319e-80	0.436171571058478	0.571	0.129	4.23390184399997e-76	0	Efemp1
Scara5	1.73661893669889e-79	0.475013007905075	0.622	0.155	2.40521722732796e-75	0	Scara5
Islr	5.76724944769404e-78	0.449950973945388	0.677	0.194	7.98764048505624e-74	0	Islr
Fap	2.23005756023027e-75	0.411616963533299	0.445	0.077	3.08862972091892e-71	0	Fap
Kcnk2	1.65978873296702e-74	0.274418821350862	0.268	0.013	2.29880739515932e-70	0	Kcnk2
Sec11c	8.64938513735827e-74	0.441556196794754	0.505	0.115	1.19793984152412e-69	0	Sec11c
Abca8a	1.46257170186855e-70	0.547690938893619	0.745	0.274	2.02566180708794e-66	0	Abca8a
Ccl7	1.19174477439255e-69	0.603961267310104	0.321	0.036	1.65056651253368e-65	0	Ccl7
Lamc1	1.26079458160252e-68	0.485812069181814	0.626	0.204	1.74620049551949e-64	0	Lamc1
Cxcl1	1.09242445627441e-67	1.18716900453358	0.482	0.127	1.51300787194006e-63	0	Cxcl1
Gpc4	1.14602388724052e-67	0.313302199481115	0.353	0.049	1.58724308382812e-63	0	Gpc4
Col6a2	1.44038387770246e-67	0.494695651430377	0.702	0.248	1.9949316706179e-63	0	Col6a2
Maged2	3.01762115281915e-67	0.434185166716125	0.518	0.132	4.17940529665452e-63	0	Maged2
Pdpn	4.60971716347836e-67	0.348719333940763	0.367	0.056	6.38445827141753e-63	0	Pdpn
Nid1	2.3446341104056e-66	0.470531830223982	0.757	0.291	3.24731824291176e-62	0	Nid1
Hspa5	8.95452908303805e-66	0.651687711079681	0.922	0.631	1.24020227800077e-61	0	Hspa5
Col8a1	1.66334528404829e-65	0.435908332343318	0.53	0.131	2.30373321840688e-61	0	Col8a1
Srpx	2.62471093878627e-65	0.392862192859175	0.475	0.109	3.63522465021898e-61	0	Srpx
Podn	7.19511234647085e-65	0.336578908977173	0.397	0.072	9.96523059986212e-61	0	Podn
Sdc2	6.0168804360659e-62	0.41811761845139	0.553	0.161	8.33337940395127e-58	0	Sdc2
Steap3	1.58891024604301e-61	0.341892219952654	0.422	0.087	2.20064069076957e-57	0	Steap3
Meg3	3.46985323831147e-61	0.589948385641371	0.727	0.305	4.80574673506139e-57	0	Meg3
Kdelr3	1.95724301044663e-60	0.301099390895741	0.356	0.06	2.71078156946858e-56	0	Kdelr3
Fosb	1.15845220266354e-59	0.850282597538773	0.807	0.493	1.604456300689e-55	0	Fosb
Sult5a1	3.05704005606484e-59	0.339029890596313	0.367	0.067	4.23400047764981e-55	0	Sult5a1
Olfml3	2.63946022917973e-58	0.353951551894205	0.479	0.121	3.65565241741392e-54	0	Olfml3
Adam19	5.93388733459896e-56	0.278664442126099	0.287	0.037	8.21843395841956e-52	0	Adam19
Vwa1	1.75769266589582e-55	0.404409665283947	0.688	0.265	2.43440434226571e-51	0	Vwa1
Serpinh1	2.14788946895295e-55	0.4742970138	0.885	0.497	2.97482691449984e-51	0	Serpinh1
Sparc	3.05248899339252e-55	0.430932675491429	0.995	0.979	4.22769725584864e-51	0	Sparc
Dpep1	9.47784785311463e-55	0.43458905667211	0.546	0.173	1.31268192765638e-50	0	Dpep1
Lamb1	1.3597435911896e-53	0.455514180147209	0.525	0.172	1.88324487379759e-49	0	Lamb1
9130206I24Rik	6.21786180868631e-53	0.277029874919753	0.278	0.037	8.61173860503053e-49	0	9130206I24Rik
Tcf4	2.87489724107033e-50	0.46668130923149	0.729	0.325	3.9817326788824e-46	0	Tcf4
Pcolce	1.22650202005441e-49	0.305067180608014	0.75	0.301	1.69870529777536e-45	0	Pcolce
Eps8	6.39914153890625e-49	0.267264698661372	0.287	0.047	8.86281103138516e-45	0	Eps8
Nupr1	3.45576436129925e-47	0.470187737942609	0.495	0.167	4.78623364039946e-43	0	Nupr1
Cpq	3.50194613185806e-47	0.291116534900416	0.367	0.087	4.85019539262341e-43	0	Cpq
Cd302	5.26638845451433e-47	0.392436373381683	0.596	0.229	7.29394800950235e-43	0	Cd302
Cd63	7.48966915961012e-47	0.414657834449852	0.821	0.431	1.037319178606e-42	0	Cd63
Tnfaip6	7.89347785751382e-46	0.398724242515147	0.294	0.054	1.09324668326566e-41	0	Tnfaip6
App	2.74325476867328e-45	0.443981731558898	0.881	0.662	3.7994078546125e-41	0	App
Ogfrl1	2.86116322461059e-44	0.257252020947659	0.268	0.045	3.96271106608567e-40	0	Ogfrl1
Col5a1	6.91181670684148e-43	0.333659198873838	0.576	0.215	9.57286613897544e-39	0	Col5a1
C1s	1.37730784970887e-42	0.375243571845959	0.741	0.355	1.90757137184678e-38	0	C1s
Entpd2	8.13446964646504e-42	0.360370128589339	0.615	0.251	1.12662404603541e-37	0	Entpd2
Col5a2	9.3916825696679e-42	0.366798394538164	0.695	0.306	1.300748035899e-37	0	Col5a2
Vimp	9.68988042186237e-42	0.352925771015942	0.484	0.173	1.34204843842794e-37	0	Vimp
Vcan	1.06613748597586e-41	0.316887890619821	0.323	0.075	1.47660041807657e-37	0	Vcan
Col5a3	1.28036817682297e-41	0.330980660482151	0.544	0.201	1.77330992489981e-37	0	Col5a3
Dcbld2	1.49809551550062e-41	0.259449972458441	0.305	0.067	2.07486228896836e-37	0	Dcbld2
Atf4	6.50977888615945e-41	0.475611814020191	0.658	0.349	9.01604375733083e-37	0	Atf4
Hlf	8.42031748166567e-41	0.252671183769768	0.28	0.056	1.1662139712107e-36	0	Hlf
Copz2	2.65475142036666e-40	0.322421764055595	0.415	0.134	3.67683071720782e-36	0	Copz2
Bicc1	2.68660438417029e-40	0.291562863852257	0.477	0.159	3.72094707207585e-36	0	Bicc1
Ctsk	5.59853925418112e-40	0.324953149402789	0.388	0.115	7.75397686704085e-36	0	Ctsk
Rcn3	8.22934938728640e-40	0.349696817314907	0.683	0.331	1.13976489013917e-35	0	Rcn3
Epyc	9.80400491743595e-40	0.442901367834289	0.151	0.009	1.35785468106488e-35	0	Epyc
Ly6c1	2.04155280452801e-39	-0.973722549172435	0.131	0.445	2.8275506342713e-35	0	Ly6c1
Fkbp7	4.0961375035995e-38	0.326741501130242	0.498	0.192	5.6731504424853e-34	0	Fkbp7
Jun	7.60913767493352e-38	0.605548951926818	0.917	0.807	1.05386556797829e-33	0	Jun
Mxra8	1.43537782420982e-37	0.325447870616236	0.466	0.173	1.9879982865306e-33	0	Mxra8
Cox6c	1.87397249833491e-37	0.415679257542178	0.849	0.57	2.59545191019385e-33	0	Cox6c
B2m	1.9578697642138e-37	-0.620238035003378	0.686	0.841	2.71164962343611e-33	0	B2m
Ebf2	2.75925215705622e-37	0.299956371469557	0.411	0.135	3.82156423752287e-33	0	Ebf2
Cd200	8.43266434624726e-37	-0.497195234897866	0.03	0.334	1.16792401195525e-32	0	Cd200
Abca8b	1.27698094465319e-36	0.306114883310573	0.397	0.124	1.76861860834466e-32	0	Abca8b
Atf5	2.30818965733832e-36	0.312139418601825	0.39	0.128	3.19684267541357e-32	0	Atf5
Laptm4b	2.46574165186914e-36	0.263675788745462	0.351	0.101	3.41505218783877e-32	0	Laptm4b
Timp3	2.60237476183116e-36	-0.581373655084565	0.427	0.693	3.60428904513615e-32	0	Timp3
Mmp14	1.36057406559558e-35	0.317178818571353	0.459	0.174	1.88439508084988e-31	0	Mmp14
Spp1	2.15337272612422e-35	0.253896012213023	0.193	0.027	2.98242122568205e-31	0	Spp1
Nav1	2.61067129709956e-35	0.309916336616072	0.383	0.125	3.61577974648289e-31	0	Nav1
Psip1	4.33757845190331e-35	0.303547907629376	0.404	0.14	6.00754615588609e-31	0	Psip1
Ier2	8.37779068176771e-35	0.704004887781028	0.784	0.573	1.16032400942483e-30	0	Ier2
Cst3	1.26513792559747e-34	-0.7903827871732	0.814	0.885	1.75221602695249e-30	0	Cst3
Hspb1	2.32188001015312e-34	-0.823238860386028	0.087	0.385	3.21580381406207e-30	0	Hspb1
Pamr1	2.43003426282493e-34	0.272348909578451	0.388	0.125	3.36559745401253e-30	0	Pamr1
Rnd3	5.16139552089416e-34	0.301818507917152	0.369	0.117	7.14853279643842e-30	0	Rnd3
Egr1	7.10615554356361e-34	0.497227364359701	0.906	0.753	9.84202542783561e-30	0	Egr1
Mgll	1.22766684820888e-33	-0.484667973774501	0.032	0.319	1.7003185847693e-29	0	Mgll
Spry2	3.1400683383218e-33	0.259852389189571	0.346	0.105	4.34899464857569e-29	0	Spry2
Pgrmc1	1.34323975622492e-32	0.270429125486407	0.429	0.16	1.86038706237151e-28	0	Pgrmc1
Sdpr	4.71909854715724e-32	-0.786491390383566	0.076	0.355	6.53595148781277e-28	0	Sdpr
Tinagl1	4.73100532591165e-32	-0.480851606082744	0.011	0.276	6.55244237638764e-28	0	Tinagl1
Phlda1	8.76313824738108e-32	0.521793945324945	0.493	0.209	1.21369464726228e-27	0	Phlda1
Gpr116	1.12766329705301e-31	-0.54866249307276	0.018	0.283	1.56181366641842e-27	0	Gpr116
Kdelr2	1.3181018858452e-31	0.282540749349207	0.447	0.179	1.82557111189561e-27	0	Kdelr2
Naalad2	1.67439648319724e-31	0.275709393344875	0.372	0.127	2.31903912922818e-27	0	Naalad2
Rpl41	4.7159430475291e-31	-0.400759586072371	0.789	0.883	6.5315811208278e-27	0	Rpl41
Hspg2	8.55609815008445e-31	0.299739464312536	0.484	0.207	1.1850195937867e-26	0	Hspg2
Cyb5	9.96252736837504e-31	0.326207854711686	0.606	0.319	1.37981004051994e-26	0	Cyb5
Hmgcs1	2.41054900183946e-30	0.252552387354247	0.397	0.142	3.33861036754766e-26	0	Hmgcs1
H2-D1	2.49703701848061e-30	-0.646574152041963	0.647	0.762	3.45839627059564e-26	0	H2-D1
Neat1	3.49539879983509e-30	-0.489613316396612	0.156	0.453	4.8411273377716e-26	0	Neat1
Rps21	3.55696741374929e-30	-0.474443414830583	0.725	0.831	4.92639986804277e-26	0	Rps21
Egfl7	1.68522540283375e-29	-0.664762455844656	0.053	0.312	2.33403718292475e-25	0	Egfl7
Tmem176b	1.99728783895511e-29	-0.398189827867347	0.062	0.333	2.76624365695283e-25	0	Tmem176b
Gas6	2.22467713981721e-29	-0.584304473173949	0.071	0.345	3.08117783864684e-25	0	Gas6
Esam	5.02487441069851e-29	-0.463712633285411	0.028	0.279	6.95945105881744e-25	0	Esam
Sc4mol	5.05393986374981e-29	0.263996228681222	0.342	0.113	6.99970671129348e-25	0	Sc4mol
Itih5	5.60756469358411e-29	-0.427835052848031	0.044	0.302	7.766477100614e-25	0	Itih5
Ly6a	5.61361975331371e-29	-0.801831110361628	0.209	0.463	7.77486335833949e-25	0	Ly6a
Rhoj	8.59028780973066e-29	0.339764259072456	0.489	0.232	1.1897548616477e-24	0	Rhoj
Plat	2.07107993394924e-28	0.27972436973234	0.349	0.124	2.8684457085197e-24	0	Plat
Tagln2	2.59630311484977e-28	-0.373435950080853	0.067	0.331	3.59587981406693e-24	0	Tagln2
Mal	4.97214994057672e-28	-0.563256387581766	0.021	0.261	6.88642766769876e-24	0	Mal
Plp1	1.68441381111503e-27	-1.37525529928604	0.037	0.277	2.33291312839432e-23	0	Plp1
Ahnak	2.11712906653976e-27	-0.613971405245069	0.447	0.651	2.93222375715756e-23	0	Ahnak
Cyr61	2.64050115914216e-27	-0.746324429038509	0.14	0.413	3.65709410541189e-23	0	Cyr61
Cryab	3.2394147574236e-27	-0.619992838231742	0.069	0.319	4.48658943903168e-23	0	Cryab
Txnip	1.12768338213916e-26	-0.405806674974857	0.167	0.436	1.56184148426274e-22	0	Txnip
Nfib	1.70412369595713e-26	-0.451500157681176	0.172	0.435	2.36021131890063e-22	0	Nfib
Actb	2.88592205476266e-26	-0.471130596138756	0.961	0.973	3.99700204584629e-22	0	Actb
Rcn1	3.78052608716289e-26	0.258186874754616	0.397	0.162	5.23602863072061e-22	0	Rcn1
Ptn	5.242861774523e-26	-0.624781674521322	0.023	0.252	7.26136355771435e-22	0	Ptn
Pecam1	5.79365691698062e-26	-0.48592343169325	0.025	0.255	8.02421483001817e-22	0	Pecam1
Tuba1a	5.82268851625909e-26	0.331333789024025	0.722	0.442	8.06442359501883e-22	0	Tuba1a
Hspa1b	1.19112868608507e-25	-0.530257640476996	0.089	0.344	1.64971323022782e-21	0	Hspa1b
Rps24	1.51026719356572e-25	-0.423921388850462	0.672	0.807	2.09172006308852e-21	0	Rps24
Rps14	1.90019731630989e-25	-0.447912282343366	0.814	0.881	2.6317732830892e-21	0	Rps14
Calr	3.20909838144199e-25	0.312788484738607	0.789	0.547	4.44460125829716e-21	0	Calr
Cd34	3.54358659295932e-25	0.29378819024322	0.585	0.307	4.90786743124866e-21	0	Cd34
Thbd	4.55366611670474e-25	-0.340802649570305	0.025	0.249	6.30682757163607e-21	0	Thbd
Dnajb1	5.73894960276002e-25	0.65129410939035	0.493	0.269	7.94844519982263e-21	0	Dnajb1
Tspan13	6.5414917234555e-25	-0.433188111178005	0.018	0.236	9.05996603698587e-21	0	Tspan13
Cdh5	7.28241674227609e-25	-0.315980807205521	0.011	0.225	1.00861471880524e-20	0	Cdh5
Flt1	1.04442545821694e-24	-0.53474790488404	0.028	0.247	1.44652925963047e-20	0	Flt1
Gnas	3.32219666410002e-24	-0.432459111341211	0.835	0.893	4.60124237977853e-20	0	Gnas
Prnp	3.66979572385062e-24	-0.514334215551287	0.209	0.445	5.08266707753312e-20	0	Prnp
Tmem176a	7.64666771341961e-24	-0.340802649570305	0.028	0.243	1.05906347830862e-19	0	Tmem176a
Bcam	8.83176106519009e-24	-0.278189973672909	0.014	0.223	1.22319890752883e-19	0	Bcam
Actn4	1.4286871256485e-23	-0.412022040679787	0.138	0.378	1.97873166902317e-19	0	Actn4
Ramp2	1.64750251921556e-23	0.266888438295688	0.583	0.307	2.28179098911355e-19	0	Ramp2
Ehd4	2.95098093124419e-23	-0.477112802011095	0.039	0.255	4.0871085897732e-19	0	Ehd4
Mbp	4.41655927325164e-23	-1.06570175002464	0.044	0.256	6.11693459345352e-19	0	Mbp
Rplp2	4.50754713792001e-23	-0.383338512647377	0.681	0.779	6.24295278601922e-19	0	Rplp2
Prss23	6.22641441839319e-23	-0.307213765215697	0.034	0.249	8.62358396947457e-19	0	Prss23
Sorbs2	8.19371416380297e-23	-0.332187072292265	0.009	0.207	1.13482941168671e-18	0	Sorbs2
Itga6	1.39420940924567e-22	-0.329285424554028	0.021	0.223	1.93098003180525e-18	0	Itga6
Plin3	2.0121716873797e-22	0.250559206444391	0.333	0.136	2.78685778702089e-18	0	Plin3
Fos	3.78559262227979e-22	0.370426057894468	0.915	0.819	5.2430457818575e-18	0	Fos
Fmo2	4.61418410867077e-22	-0.276584188434104	0.005	0.193	6.39064499050902e-18	0	Fmo2
Thbs1	7.5127112120305e-22	0.356986495082883	0.284	0.103	1.04051050286622e-17	0	Thbs1
Sncg	8.37133915006628e-22	-0.330023453879655	0.011	0.203	1.15943047228418e-17	0	Sncg
Rpl13a	1.00856361896203e-21	-0.377862210301483	0.764	0.838	1.39686061226242e-17	0	Rpl13a
Tagln	1.40127318655332e-21	-0.814010434788888	0.032	0.232	1.94076336337635e-17	0	Tagln
C3	1.63951112505623e-21	-0.65003801666313	0.041	0.243	2.27072290820288e-17	0	C3
Fbln1	1.92749161713396e-21	-0.403859779853955	0.009	0.195	2.66957588973054e-17	0	Fbln1
Limch1	2.57152466035006e-21	-0.298352216184688	0.009	0.195	3.56156165458484e-17	0	Limch1
Aspn	2.64976352760093e-21	-0.480616688836602	0.044	0.245	3.66992248572729e-17	0	Aspn
Cav1	4.41216609667742e-21	-0.505417738889499	0.241	0.456	6.11085004389823e-17	0	Cav1
Dst	5.4091752312143e-21	-0.330151011900187	0.08	0.295	7.4917076952318e-17	0	Dst
Utrn	5.70468810747344e-21	-0.363080228160944	0.087	0.303	7.90099302885071e-17	0	Utrn
Hspa1a	6.9497882098538e-21	-0.764625087680708	0.232	0.455	9.62545667064751e-17	0	Hspa1a
Rps15	7.24502775202656e-21	-0.364271201421174	0.672	0.78	1.00343634365568e-16	0	Rps15
Ptprb	8.95904122666145e-21	-0.44821833601138	0.041	0.237	1.24082720989261e-16	0	Ptprb
Col14a1	1.05937298099859e-20	-0.350764053898184	0.005	0.182	1.46723157868305e-16	0	Col14a1
Pabpc1	1.20036654301461e-20	0.299053657166108	0.826	0.653	1.66250766207524e-16	0	Pabpc1
Chrdl1	1.20896185860969e-20	-0.358355582156868	0.014	0.197	1.67441217417442e-16	0	Chrdl1
Igfbp7	1.3945521188644e-20	-0.788825765961659	0.915	0.837	1.93145468462719e-16	0	Igfbp7
Socs3	1.5369683771415e-20	0.337636550535308	0.544	0.298	2.12870120234098e-16	0	Socs3
Clu	1.61052232154226e-20	-0.393705113689098	0.039	0.236	2.23057341533603e-16	0	Clu
Cd81	2.05418482973284e-20	0.259959378316592	0.826	0.649	2.84504598917998e-16	0	Cd81
Epas1	2.83295813491563e-20	-0.293524620601947	0.032	0.225	3.92364701685815e-16	0	Epas1
Rps9	3.93969998714774e-20	-0.35170809479311	0.743	0.829	5.45648448219961e-16	0	Rps9
Abcb1a	4.36048013132977e-20	-0.495580111636085	0.021	0.203	6.03926498189174e-16	0	Abcb1a
Pcolce2	1.93675666052677e-19	-0.398827628319156	0.011	0.184	2.68240797482957e-15	0	Pcolce2
Ppp1r15a	2.59778062041979e-19	0.354047701251211	0.523	0.297	3.59792615928141e-15	0	Ppp1r15a
Emcn	2.73730477421834e-19	-0.299136222496897	0.025	0.206	3.79116711229241e-15	0	Emcn
Fam101b	3.36904219859549e-19	-0.296825498330888	0.002	0.166	4.66612344505475e-15	0	Fam101b
Mmrn2	3.5816249565945e-19	-0.273013933389534	0.014	0.185	4.96055056488339e-15	0	Mmrn2
Sptbn1	3.63926940530114e-19	-0.387003440933384	0.553	0.701	5.04038812634208e-15	0	Sptbn1
C130074G19Rik	3.76212779745331e-19	-0.351537413254935	0.037	0.22	5.21054699947284e-15	0	C130074G19Rik
mt-Rnr2	6.47666220214064e-19	-0.365345087240018	0.993	0.995	8.97017714996479e-15	0	mt-Rnr2
Fth1	9.00802524489007e-19	-0.327735771908954	0.972	0.979	1.24761149641727e-14	0	Fth1
Rps11	9.56244110582322e-19	-0.39699434409449	0.475	0.619	1.32439809315652e-14	0	Rps11
Gas1	9.86522828091843e-19	-0.382593448661588	0.032	0.212	1.3663341169072e-14	0	Gas1
Rpl32	1.14635928782075e-18	-0.362414115977263	0.67	0.746	1.58770761363173e-14	0	Rpl32
Srgn	1.15871908097306e-18	-0.385870681358969	0.078	0.274	1.60482592714769e-14	0	Srgn
Fabp4	1.41857642862807e-18	-1.7909784880131	0.241	0.425	1.96472835364987e-14	0	Fabp4
Cd59a	1.58227228495584e-18	-0.506220886169165	0.135	0.333	2.19144711466384e-14	0	Cd59a
Cd36	1.67904216777826e-18	-0.728147760165538	0.034	0.209	2.3254734023729e-14	0	Cd36
Junb	1.87824428602082e-18	0.340617083827881	0.881	0.751	2.60136833613884e-14	0	Junb
Cfh	2.59943624473294e-18	-0.528577931747276	0.03	0.204	3.60021919895512e-14	0	Cfh
Abcg2	3.8918329187795e-18	-0.366424790205315	0.048	0.228	5.3901885925096e-14	0	Abcg2
Ablim1	7.50786170249412e-18	-0.288315412222472	0.087	0.283	1.03983884579544e-13	0	Ablim1
Myl6	9.99227101002358e-18	-0.422019018014839	0.294	0.489	1.38392953488827e-13	0	Myl6
Rplp1	1.03387452908908e-17	-0.325610514856841	0.892	0.919	1.43191622278838e-13	0	Rplp1
Hsp90b1	1.69351567634634e-17	0.286827930950996	0.865	0.727	2.34551921173968e-13	0	Hsp90b1
S1pr1	2.21668414382075e-17	-0.260150058424086	0.011	0.167	3.07010753919175e-13	0	S1pr1
Fgl2	2.2807763321429e-17	-0.315807756784869	0.03	0.201	3.15887522001792e-13	0	Fgl2
Slfn5	2.73108260896785e-17	-0.269456648991334	0.048	0.226	3.78254941342048e-13	0	Slfn5
Ybx1	3.20619960566017e-17	-0.373859768692833	0.42	0.595	4.44058645383934e-13	0	Ybx1
Edn1	3.25784144425464e-17	-0.506151654707593	0.016	0.173	4.51211040029267e-13	0	Edn1
Calm1	3.84062232349236e-17	-0.498583833703451	0.663	0.753	5.31926191803692e-13	0	Calm1
Rpl37	5.47643128487477e-17	-0.330881122027974	0.55	0.665	7.58485732955156e-13	0	Rpl37
Kcna1	5.5833722593135e-17	-0.447486083937508	0.021	0.178	7.7329705791492e-13	0	Kcna1
Cldn5	8.05209757286782e-17	-0.654762154159235	0.016	0.169	1.11521551384219e-12	0	Cldn5
Gatm	1.000865960441e-16	-0.39980099033226	0.023	0.18	1.38619935521078e-12	0	Gatm
C4b	1.11942412897666e-16	-0.290966560251891	0.021	0.177	1.55040241863268e-12	0	C4b
Scarb1	1.1403440912933e-16	-0.332049498632818	0.048	0.219	1.57937656644122e-12	0	Scarb1
Wdr89	1.14411687341582e-16	-0.327455420168127	0.466	0.607	1.58460186968091e-12	0	Wdr89
Rps10	2.63546009675435e-16	-0.317868163763255	0.493	0.642	3.65011223400477e-12	0	Rps10
Sfrp4	8.18278606622173e-16	-0.944178740554562	0.055	0.216	1.13331587017171e-11	0	Sfrp4
Nrp1	9.2151893319347e-16	-0.378269919170386	0.167	0.353	1.27630372247296e-11	0	Nrp1
Ctnna1	9.89855940690443e-16	-0.290145574733672	0.144	0.335	1.37095047785626e-11	0	Ctnna1
Rpl8	1.48411121838508e-15	-0.310861400230122	0.603	0.705	2.05549403746334e-11	0	Rpl8
Crip2	1.79132152614593e-15	-0.310823149438804	0.2	0.385	2.48098031371211e-11	0	Crip2
Rps3	3.24519851045833e-15	-0.347906030639417	0.688	0.731	4.49459993698478e-11	0	Rps3
Ifitm3	4.21547006092193e-15	-0.385010601718303	0.713	0.762	5.83842603437687e-11	0	Ifitm3
Rps20	5.21031018310046e-15	-0.358553347410158	0.647	0.718	7.21627960359414e-11	0	Rps20
Slc9a3r2	5.94282934112436e-15	-0.303956564871736	0.071	0.235	8.23081863745724e-11	0	Slc9a3r2
Fabp5	6.02554467170358e-15	-0.262000854760452	0.023	0.166	8.34537937030946e-11	0	Fabp5
Myh9	8.86508123873239e-15	-0.306607541683666	0.112	0.281	1.22781375156444e-10	0	Myh9
Ctla2a	1.5543601807796e-14	-0.279793259653766	0.03	0.173	2.15278885037975e-10	0	Ctla2a
Acta2	1.8540435983122e-14	-1.10787802232326	0.071	0.229	2.5678503836624e-10	0	Acta2
Mpz	2.18689123305229e-14	-1.79307642051245	0.085	0.243	3.02884435777742e-10	0	Mpz
Cnp	2.96990683586264e-14	-0.449782595464252	0.06	0.209	4.11332096766975e-10	0	Cnp
Tpm1	3.05524420836902e-14	-0.756778940231254	0.266	0.423	4.23151322859109e-10	0	Tpm1
Apold1	3.76897246997653e-14	-0.283889994578958	0.002	0.124	5.22002687091749e-10	0	Apold1
Sostdc1	5.5508584254488e-14	-0.378747581134428	0.018	0.151	7.68793891924658e-10	0	Sostdc1
Ly6e	5.572592940423e-14	-0.575369273095541	0.241	0.391	7.71804122248586e-10	0	Ly6e
Ltbp4	5.84856955753835e-14	-0.378818771798311	0.158	0.326	8.10026883719062e-10	0	Ltbp4
Ptms	8.79385958637013e-14	-0.310639060177339	0.456	0.589	1.21794955271226e-09	0	Ptms
Nbl1	8.86027315350674e-14	-0.326772465946552	0.083	0.242	1.22714783176068e-09	0	Nbl1
Dpt	2.15225209245563e-13	-0.705383661641033	0.092	0.239	2.98086914805105e-09	0	Dpt
Ndrg1	2.17015854547327e-13	-0.409306517688581	0.259	0.413	3.00566958548049e-09	0	Ndrg1
Plvap	2.33815919023358e-13	-0.586751391571466	0.032	0.165	3.23835047847351e-09	0	Plvap
Rpl37a	2.47956785077176e-13	-0.312983437347864	0.608	0.68	3.43420147331888e-09	0	Rpl37a
8430408G22Rik	4.19524312387928e-13	-0.371201371026223	0.037	0.17	5.8104117265728e-09	0	8430408G22Rik
H2-K1	4.27738102747231e-13	-0.392418474082602	0.415	0.532	5.92417272304915e-09	0	H2-K1
Plekha4	6.0524659169479e-13	-0.332672210286219	0.044	0.179	8.38266529497285e-09	0	Plekha4
Nudt4	8.4736402292635e-13	-0.274260403470079	0.115	0.272	1.17359917175299e-08	0	Nudt4
Emp2	1.89516664424692e-12	-0.274821718774494	0.076	0.219	2.62480580228198e-08	0	Emp2
Sfrp2	1.94696139274863e-12	-0.600116509090269	0.028	0.151	2.69654152895686e-08	0	Sfrp2
Gm9843	2.04266787504553e-12	-0.281579675616377	0.399	0.54	2.82909500693806e-08	0	Gm9843
Sfrs18	2.07322429886899e-12	-0.254366504713141	0.255	0.443	2.87141565393355e-08	0	Sfrs18
Myl12a	4.58869075469874e-12	-0.327656703719645	0.429	0.543	6.35533669525776e-08	0	Myl12a
Chl1	6.7289786716829e-12	-0.258300286505398	0.005	0.109	9.31963546028081e-08	0	Chl1
Procr	8.15065931656132e-12	-0.277886843441336	0.094	0.237	1.12886631534374e-07	0	Procr
Rps5	9.77731468278845e-12	-0.292817238870443	0.663	0.721	1.3541580835662e-07	0	Rps5
Ckb	1.1128675323599e-11	-0.25082437430675	0.092	0.233	1.54132153231846e-07	0	Ckb
Hes1	1.14326928164002e-11	-0.368718369192415	0.106	0.252	1.58342795507143e-07	0	Hes1
Slc2a1	1.3309500947768e-11	-0.269730325454427	0.032	0.151	1.84336588126586e-07	0	Slc2a1
Gpx3	1.77294332980801e-11	-0.296137375855135	0.023	0.137	2.45552651178409e-07	0	Gpx3
Gnb2l1	1.90533492138313e-11	-0.262928207985551	0.482	0.593	2.63888886611563e-07	0	Gnb2l1
Inmt	2.12708051686868e-11	-0.560665637934117	0.018	0.128	2.94600651586312e-07	0	Inmt
Qk	2.50012747108947e-11	-0.276719343582355	0.149	0.301	3.46267654745892e-07	0	Qk
Rpl22	3.26989222445308e-11	-0.292330168027897	0.482	0.587	4.52880073086751e-07	0	Rpl22
Rgs5	4.33976004641528e-11	-0.662186794407861	0.025	0.137	6.01056766428517e-07	0	Rgs5
Cd9	4.43034696409584e-11	-0.460122296452481	0.477	0.568	6.13603054527274e-07	0	Cd9
Rpl18	4.92063651209422e-11	-0.252445766842275	0.298	0.445	6.81508156925049e-07	0	Rpl18
Lox	1.21999793195583e-10	-0.254831614306343	0.014	0.114	1.68969713575882e-06	0	Lox
Gdf10	2.09246749433563e-10	-0.279893976274502	0.023	0.127	2.89806747965485e-06	0	Gdf10
Kif5b	2.68311482784015e-10	-0.251107510323138	0.236	0.385	3.7161140365586e-06	0	Kif5b
Aqp1	3.55864495805589e-10	-0.574257309411125	0.053	0.166	4.92872326690741e-06	0	Aqp1
Fst	3.82983021182375e-10	-0.280924685432959	0.053	0.169	5.3043148433759e-06	0	Fst
Igfbp6	3.98796280656526e-10	-0.468140259029142	0.647	0.399	5.52332848709288e-06	0	Igfbp6
Tsc22d1	4.03701857664455e-10	-0.334053518292414	0.222	0.356	5.5912707286527e-06	0	Tsc22d1
Crip1	4.33005274045006e-10	-0.55282629315095	0.739	0.799	5.99712304552333e-06	0	Crip1
Rpl14	5.16906051726608e-10	-0.26676550647069	0.608	0.658	7.15914881641352e-06	0	Rpl14
Dnaja1	8.83946868266909e-10	0.268481524378601	0.516	0.361	1.22426641254967e-05	0	Dnaja1
Lgi4	9.72318043059368e-10	-0.381728933342177	0.085	0.203	1.34666048963722e-05	0	Lgi4
Ank3	1.14930992418669e-09	-0.295432135394595	0.053	0.163	1.59179424499856e-05	0	Ank3
Lrg1	1.41921393516856e-09	-0.328759891707122	0.025	0.123	1.96561130020846e-05	0	Lrg1
mt-Rnr1	1.63252692965829e-09	-0.311316036029221	0.468	0.585	2.26104979757674e-05	0	mt-Rnr1
Filip1l	1.63255327577224e-09	-0.414712650766951	0.117	0.243	2.26108628694456e-05	0	Filip1l
Ncl	2.03471606740581e-09	-0.264728447681613	0.356	0.477	2.81808175335705e-05	0	Ncl
Rpl4	5.75184922347475e-09	-0.256538688575367	0.702	0.719	7.96631117451252e-05	0	Rpl4
Pi16	7.39516815157888e-09	-0.681660673977025	0.057	0.16	0.000102423078899368	0	Pi16
Myh11	7.68744184753192e-09	-0.54668257332888	0.028	0.121	0.000106471069588317	0	Myh11
Klf4	7.97354571781197e-09	0.271202042403582	0.523	0.391	0.000110433608191696	0	Klf4
Pcp4l1	8.71370811243743e-09	-0.294094800223971	0.071	0.178	0.000120684857357258	0	Pcp4l1
Ccdc80	8.9341859769679e-09	-0.439850722910719	0.124	0.24	0.000123738475781005	0	Ccdc80
Gadd45g	9.54228134270576e-09	-0.380524440438566	0.209	0.344	0.000132160596596475	0	Gadd45g
Nfkbia	1.28087491664805e-08	-0.35419085338704	0.294	0.424	0.000177401175955755	0	Nfkbia
Secisbp2l	1.43366596531189e-08	-0.299263793276072	0.069	0.175	0.000198562736195697	0	Secisbp2l
Sfrp5	1.64217278264114e-08	-0.635718940128288	0.039	0.133	0.000227440930395798	0	Sfrp5
Art3	6.69169155285535e-08	-0.265253249721159	0.087	0.188	0.000926799280070466	0	Art3
Rps26	2.04211461737403e-07	-0.250329974821904	0.661	0.668	0.00282832874506304	0	Rps26
Gpm6b	3.43203109027988e-07	-0.4417016512487	0.135	0.227	0.00475336306003763	0	Gpm6b
Igfbp4	1.18338047808185e-06	-0.416466797824423	0.383	0.444	0.0163898196214336	0	Igfbp4
Cadm4	2.14553814196383e-06	-0.28035847817715	0.071	0.153	0.0297157032661991	0	Cadm4
Ier3	4.10939710551443e-06	-0.457903130456163	0.188	0.275	0.0569151499113748	0	Ier3
Tm4sf1	1.5311258411766e-05	-0.374482627635424	0.303	0.374	0.212060929002959	0	Tm4sf1
Arpc1b	0.000158270575458581	-0.28878825652103	0.427	0.477	1	0	Arpc1b
Pmp22	0.000183750235611238	-0.808236220295418	0.353	0.387	1	0	Pmp22
Mustn1	0.000479723711917177	-0.27120561463275	0.112	0.175	1	0	Mustn1
Bsg	0.000741893520803613	-0.3931895348325	0.567	0.579	1	0	Bsg
Tpm2	0.000932344531166243	-0.603816989317368	0.099	0.153	1	0	Tpm2
Dbi	0.0018295635186667	-0.631849360359412	0.493	0.5	1	0	Dbi
Timp2	0.00463679681403632	-0.361252151838258	0.589	0.535	1	0	Timp2
Sfrp1	0.00850557942479362	-0.259641799200946	0.112	0.155	1	0	Sfrp1
Plp1.1	1.13381596914652e-219	1.477454838512	0.96	0.101	1.57033511726793e-215	1	Plp1
Sostdc1.1	9.54425238031662e-211	1.21211220157468	0.676	0.029	1.32187895467385e-206	1	Sostdc1
Lgi4.1	1.39613785687673e-202	1.29289901352034	0.789	0.075	1.93365093177427e-198	1	Lgi4
Scn7a	1.83845437324111e-191	1.81796453780122	0.876	0.142	2.54625930693894e-187	1	Scn7a
Chl1.1	5.0838160632973e-182	0.931695837310403	0.531	0.011	7.04108524766676e-178	1	Chl1
Cadm4.1	6.82505396290541e-182	1.0927210546918	0.665	0.046	9.452699738624e-178	1	Cadm4
Gpm6b.1	4.19748240639439e-172	1.29333735103274	0.8	0.108	5.81351313285624e-168	1	Gpm6b
Ttyh1	1.63621482629772e-171	0.788134362945441	0.52	0.014	2.26615753442235e-167	1	Ttyh1
Kcna1.1	6.58916409971269e-171	1.08830727307301	0.684	0.053	9.12599227810207e-167	1	Kcna1
Mbp.1	5.4988436239961e-164	0.755477284204521	0.84	0.104	7.6158984192346e-160	1	Mbp
Ank3.1	1.05855913968877e-160	1.02540084764246	0.644	0.055	1.46610440846895e-156	1	Ank3
Dbi.1	5.98546540779144e-160	1.85208778712756	0.982	0.418	8.28986958979114e-156	1	Dbi
Gpr37l1	9.06896758824706e-149	0.583646201944225	0.44	0.009	1.25605201097222e-144	1	Gpr37l1
Gatm.1	3.35039062676868e-144	0.830688068265132	0.651	0.061	4.64029101807462e-140	1	Gatm
Atp1a2	1.06321996538675e-136	1.15683882326948	0.778	0.151	1.47255965206065e-132	1	Atp1a2
Cnp.1	5.77956622165276e-135	0.861019951511844	0.702	0.089	8.00469921698907e-131	1	Cnp
Cmtm5	8.48069715404378e-133	0.610748585979293	0.455	0.02	1.17457655583506e-128	1	Cmtm5
Cadm2	7.69517533134115e-128	0.638119902623119	0.367	0.005	1.06578178339075e-123	1	Cadm2
Cadm1	2.70713693719859e-121	0.740636561627039	0.495	0.039	3.74938465802005e-117	1	Cadm1
Art3.1	5.95780374725426e-119	0.826954713064813	0.629	0.089	8.25155818994714e-115	1	Art3
Apoe	1.83022735284409e-105	1.5120377957504	0.971	0.65	2.53486488368907e-101	1	Apoe
S1pr3	2.95594579834405e-103	0.777546972844551	0.52	0.063	4.09398493070651e-99	1	S1pr3
Sox10	2.59865041735629e-100	0.48588611294934	0.404	0.028	3.59913082803847e-96	1	Sox10
Cdh2	5.92262328234061e-99	0.522061380624106	0.342	0.014	8.20283324604174e-95	1	Cdh2
Cd59a.1	4.07507716113139e-97	1.08557546135536	0.742	0.214	5.64398186816698e-93	1	Cd59a
Gas2l3	1.25588319796516e-95	0.53620026384829	0.411	0.033	1.73939822918174e-91	1	Gas2l3
Nrn1	1.87099564075356e-95	0.47006329333692	0.302	0.008	2.59132896244368e-91	1	Nrn1
Slc35f1	2.81162569731068e-95	0.445932116733957	0.324	0.013	3.8941015907753e-91	1	Slc35f1
Fxyd1	4.75407253715287e-95	1.16757559578604	0.833	0.361	6.58439046395672e-91	1	Fxyd1
Kcna6	9.31838006537864e-95	0.359239317790403	0.28	0.005	1.29059563905494e-90	1	Kcna6
Plekha4.1	8.68051241211162e-91	0.697773559122377	0.545	0.082	1.20225096907746e-86	1	Plekha4
Epb4.1l4b	5.71432406067584e-89	0.437842064793311	0.313	0.014	7.91433882403603e-85	1	Epb4.1l4b
Aatk	1.2024268752044e-88	0.595718800919253	0.447	0.049	1.66536122215809e-84	1	Aatk
Dusp6	7.65632206349757e-88	0.930186937988144	0.618	0.134	1.06040060579441e-83	1	Dusp6
Rasgef1c	8.79220406972791e-88	0.319794381916361	0.255	0.004	1.21772026365732e-83	1	Rasgef1c
Pex5l	3.38822661123261e-87	0.476351919555186	0.313	0.015	4.69269385655716e-83	1	Pex5l
Cryab.1	2.8150237475586e-82	0.86181311557522	0.702	0.19	3.89880789036866e-78	1	Cryab
Cdh19	9.62644667700318e-82	0.416235798738005	0.309	0.017	1.33326286476494e-77	1	Cdh19
Aspa	5.11113011265061e-81	0.687418112089591	0.444	0.061	7.0789152060211e-77	1	Aspa
Scd2	5.57923452234018e-80	0.936848918651092	0.796	0.328	7.72723981344115e-76	1	Scd2
Mpz.1	7.74187464611995e-79	-0.468433642909337	0.633	0.137	1.07224963848761e-74	1	Mpz
Rassf4	3.61399298358612e-77	0.370399162245463	0.276	0.013	5.00538028226678e-73	1	Rassf4
Ncam1	6.68392868805533e-75	0.388185064741588	0.273	0.013	9.25724123295664e-71	1	Ncam1
Tsc22d4	1.58393612569724e-74	0.737639192205475	0.611	0.155	2.19375153409067e-70	1	Tsc22d4
Arpc1b.1	1.46921426199878e-72	0.980927567806841	0.804	0.41	2.03486175286832e-68	1	Arpc1b
Rxrg	1.87100115977272e-72	0.28139215901447	0.229	0.006	2.59133660628522e-68	1	Rxrg
Mal.1	2.06084706410918e-72	0.640761018785302	0.622	0.138	2.85427318379122e-68	1	Mal
Erbb3	1.11763900957825e-70	0.321533207672707	0.258	0.013	1.54793002826588e-66	1	Erbb3
Snca	4.45400509035e-70	0.328728041887782	0.276	0.017	6.16879705013475e-66	1	Snca
L1cam	4.25913216477298e-69	0.324127242849754	0.251	0.012	5.89889804821058e-65	1	L1cam
Sdc4	1.69972214290446e-67	0.799183810126641	0.582	0.158	2.35411516792268e-63	1	Sdc4
Cyp2j9	6.6864874709919e-67	0.414993990870919	0.32	0.031	9.26078514732378e-63	1	Cyp2j9
Tmod2	8.6052442830784e-67	0.573189492236541	0.415	0.066	1.19182633320636e-62	1	Tmod2
Sbspon	2.80310405937793e-65	0.405268119010116	0.349	0.042	3.88229912223843e-61	1	Sbspon
Emp2.1	2.11268856530488e-64	0.66325562968428	0.531	0.13	2.92607366294726e-60	1	Emp2
Megf9	1.06825287963389e-61	0.398917604049247	0.342	0.043	1.47953023829293e-57	1	Megf9
Ahr	1.19458166086787e-61	0.397407827658615	0.291	0.028	1.654495600302e-57	1	Ahr
Pmp22.1	3.93639460266612e-59	0.331198133367977	0.749	0.318	5.45190652469258e-55	1	Pmp22
Fbxo7	7.73801084933625e-59	0.344520404224583	0.302	0.033	1.07171450263307e-54	1	Fbxo7
Zeb2	3.56132273562553e-58	0.764067604887426	0.658	0.24	4.93243198884136e-54	1	Zeb2
Ccdc37	6.4014898857314e-58	0.362492698681407	0.24	0.017	8.86606349173799e-54	1	Ccdc37
Foxd3	7.90273887814485e-57	0.29728607279065	0.215	0.011	1.09452933462306e-52	1	Foxd3
S100a4	1.90043784620679e-56	0.660022914743017	0.4	0.073	2.6321064169964e-52	1	S100a4
Col28a1	6.17001646789652e-56	0.47058027780849	0.338	0.049	8.54547280803668e-52	1	Col28a1
Atp1b2	6.35731086052753e-56	0.402409146799552	0.331	0.046	8.80487554183062e-52	1	Atp1b2
Gjc3	2.15942721646204e-54	0.396746617512924	0.324	0.045	2.99080669479992e-50	1	Gjc3
Prnp.1	7.21508320628881e-54	0.861634748729028	0.698	0.341	9.99289024071001e-50	1	Prnp
Itgb8	1.15401134131756e-52	0.383427555913499	0.276	0.031	1.59830570772481e-48	1	Itgb8
Wwp1	1.82623508881625e-52	0.542362351989657	0.378	0.071	2.52933559801051e-48	1	Wwp1
Serpina3n	2.84575664373313e-51	0.617044118094377	0.396	0.083	3.94137295157039e-47	1	Serpina3n
Ahnak.1	5.0400988330796e-51	0.957214595088692	0.822	0.569	6.98053688381524e-47	1	Ahnak
Acot1	1.19515371174166e-49	0.351192417450154	0.251	0.027	1.6552878907622e-45	1	Acot1
Vgll3	1.86103801795579e-46	0.351341916308902	0.291	0.044	2.57753765486878e-42	1	Vgll3
Ptn.1	2.22231353944009e-46	0.361551921018237	0.542	0.144	3.07790425212452e-42	1	Ptn
Matn4	3.294174888325e-45	0.28342330986551	0.229	0.024	4.56243222033013e-41	1	Matn4
Aldh1a1	1.98057152867229e-44	0.683966017816798	0.378	0.091	2.74309156721112e-40	1	Aldh1a1
Lhfpl2	2.09031477654769e-44	0.420978888567613	0.338	0.066	2.89508596551856e-40	1	Lhfpl2
Hmgcs2	4.00747014700716e-44	0.39737850624932	0.32	0.059	5.55034615360491e-40	1	Hmgcs2
Igfbp7.1	6.05616275009438e-44	-1.06180825764314	0.695	0.881	8.38778540888071e-40	1	Igfbp7
Fam134b	3.01865998504992e-43	0.263573156687518	0.218	0.022	4.18084407929414e-39	1	Fam134b
Vim	5.65725805694387e-43	0.612596216831292	0.964	0.846	7.83530240886726e-39	1	Vim
Vwa1.1	7.41788560646948e-43	0.598502393229505	0.665	0.31	1.02737715649602e-38	1	Vwa1
Cyp2j6	9.39752953554977e-43	0.340587301429651	0.28	0.045	1.30155784067364e-38	1	Cyp2j6
Tcf4.1	2.59093979829185e-42	-0.7339691750802	0.025	0.481	3.58845162063422e-38	1	Tcf4
Wnt6	3.87063127997654e-42	0.289381150545495	0.225	0.026	5.36082432276751e-38	1	Wnt6
Sat1	6.79446156317022e-41	0.933935831489021	0.76	0.462	9.41032926499076e-37	1	Sat1
Cnn3	1.03975595077539e-40	0.592624773446517	0.629	0.3	1.44006199182391e-36	1	Cnn3
Rarres2	1.22229006942037e-39	0.599380599051651	0.8	0.489	1.69287174614721e-35	1	Rarres2
Fos.1	5.20545804346029e-39	0.770858922123377	0.964	0.821	7.20955939019251e-35	1	Fos
Stard13	6.99849511041997e-39	0.330371548568052	0.298	0.058	9.69291572793166e-35	1	Stard13
Gas7	1.09760594830972e-38	0.481171604556221	0.418	0.124	1.52018423840896e-34	1	Gas7
Hspa1a.1	2.3328522548027e-38	0.927857826881219	0.695	0.357	3.23100037290174e-34	1	Hspa1a
Egfl8	5.11923365705064e-38	0.441531700931412	0.265	0.046	7.09013861501513e-34	1	Egfl8
Klf6	6.99774943530699e-38	0.8585712413821	0.778	0.512	9.69188296790018e-34	1	Klf6
Marcks	1.06491313485752e-37	0.68966693003332	0.822	0.562	1.47490469177767e-33	1	Marcks
Plekhb1	6.04586990331742e-37	0.299099893923107	0.324	0.069	8.37352981609463e-33	1	Plekhb1
C4b.1	1.53506478240705e-36	0.367386750832855	0.385	0.101	2.12606472363377e-32	1	C4b
Cd34.1	1.82372840074939e-36	-0.577483900178482	0.018	0.427	2.52586383503791e-32	1	Cd34
Mag	4.77702816395733e-36	0.262950342468159	0.211	0.028	6.6161840070809e-32	1	Mag
Cav1.1	9.98566466974841e-36	-0.719779460484504	0.062	0.465	1.38301455676016e-31	1	Cav1
Dcn.1	1.00941878049441e-35	-2.40885493769628	0.764	0.869	1.39804501098476e-31	1	Dcn
Fign	1.13398627072322e-35	0.26220362333052	0.211	0.028	1.57057098495166e-31	1	Fign
Sema3b	1.67715079187793e-34	0.424962027444125	0.433	0.143	2.32285384675094e-30	1	Sema3b
Serpinf1.1	1.83324602004554e-34	-0.96843243815894	0.102	0.487	2.53904573776307e-30	1	Serpinf1
Igfbp4.1	1.03985968515068e-33	-0.750153541187941	0.091	0.486	1.44020566393369e-29	1	Igfbp4
Entpd2.1	9.68594834195573e-33	0.532380087124224	0.6	0.288	1.34150384536087e-28	1	Entpd2
Lbh	1.64249848911968e-32	0.426301741856129	0.335	0.089	2.27486040743075e-28	1	Lbh
Junb.1	5.83814547374605e-32	0.639711912153944	0.949	0.753	8.08583148113828e-28	1	Junb
Pdlim4	8.82900167898162e-32	0.366168040569632	0.378	0.116	1.22281673253895e-27	1	Pdlim4
Ly6e.1	1.40290383040567e-31	-0.786110336362643	0.04	0.409	1.94302180511185e-27	1	Ly6e
Ecm1.1	2.24752389722769e-31	-0.681473289436275	0.047	0.42	3.11282059766036e-27	1	Ecm1
Lgals3	3.87245734028489e-31	0.402700276647906	0.364	0.109	5.36335341629457e-27	1	Lgals3
Ly6a.1	7.59194203005624e-31	-0.908580658953448	0.095	0.457	1.05148397116279e-26	1	Ly6a
Plscr2	1.03327431359962e-30	0.363653320744961	0.273	0.061	1.43108492433547e-26	1	Plscr2
Ptprf	1.92104029353635e-30	0.280881034461098	0.269	0.059	2.66064080654784e-26	1	Ptprf
Socs3.1	2.13125517928274e-30	0.709791806613197	0.604	0.312	2.95178842330659e-26	1	Socs3
Ramp2.1	2.74017894962418e-30	-0.532071335029154	0.055	0.421	3.79514784522948e-26	1	Ramp2
Col6a2.1	4.63856803744737e-30	-0.549226227406521	0.04	0.402	6.42441673186461e-26	1	Col6a2
Itga6.1	5.29501814716135e-30	0.429988841756982	0.411	0.138	7.33360013381847e-26	1	Itga6
Fn1	6.97060693332421e-30	-0.861833465116845	0.084	0.446	9.65429060265404e-26	1	Fn1
Cpe	1.12456950783779e-29	0.542650978784099	0.64	0.345	1.55752876835534e-25	1	Cpe
Sema6d	1.45046349652614e-29	0.271204197749595	0.236	0.047	2.0088919426887e-25	1	Sema6d
Igfbp5	1.58255215046949e-29	-1.17953236583355	0.124	0.474	2.19183472840025e-25	1	Igfbp5
Prdx6	9.55528347356685e-29	0.45492061625864	0.415	0.155	1.32340676108901e-24	1	Prdx6
Gpc3.1	1.26003465823486e-28	-1.21372094220435	0.196	0.516	1.74514800165527e-24	1	Gpc3
Ly6c1.1	1.93435452488445e-28	-0.929323117249691	0.08	0.423	2.67908101696496e-24	1	Ly6c1
Ednrb	2.13306237058186e-28	0.436815820992839	0.222	0.043	2.95429138325588e-24	1	Ednrb
Csrp1	3.40553600049694e-28	0.419266069498089	0.56	0.266	4.71666736068826e-24	1	Csrp1
Tmem176a.1	7.97243087018265e-28	0.465618425579232	0.418	0.158	1.1041816755203e-23	1	Tmem176a
Add3	3.62609615387365e-27	0.4657869325328	0.553	0.272	5.022143173115e-23	1	Add3
Ebf1	6.77948119963695e-27	-0.453250697206306	0.04	0.372	9.38958146149718e-23	1	Ebf1
Col6a1.1	1.30480938723263e-26	-0.561427955234978	0.087	0.423	1.80716100131719e-22	1	Col6a1
Nrp1.1	2.50261375958394e-26	-0.523849399028949	0.033	0.358	3.46612005702375e-22	1	Nrp1
Igfbp6.1	8.70362915148361e-26	-1.32707141054073	0.185	0.5	1.20545263748048e-21	1	Igfbp6
Jun.1	1.00921371710588e-25	0.633519288739083	0.931	0.815	1.39776099819164e-21	1	Jun
Pcolce.1	1.03299406989114e-25	-0.66603109386109	0.116	0.449	1.43069678679923e-21	1	Pcolce
Col16a1	1.28420973173131e-25	0.396410741283729	0.371	0.135	1.77863047844787e-21	1	Col16a1
Rps20.1	1.75085495990266e-25	-0.471327884860135	0.44	0.745	2.42493411946519e-21	1	Rps20
Tuba1a.1	1.96388352083196e-25	0.541439356597656	0.687	0.475	2.71997867635227e-21	1	Tuba1a
Mrap2	3.60853371478651e-25	0.256014579953386	0.164	0.025	4.99781919497932e-21	1	Mrap2
Cpxm1.1	4.42828030182136e-25	-0.579010544978725	0.022	0.331	6.13316821802258e-21	1	Cpxm1
Smoc2.1	6.06971794327465e-25	-1.27426222851941	0.156	0.455	8.40655935143539e-21	1	Smoc2
Hbegf	1.41728834778929e-24	0.360000248104859	0.251	0.062	1.96294436168817e-20	1	Hbegf
Cxcl12	1.49099381438276e-24	-0.835444972561397	0.127	0.444	2.06502643292012e-20	1	Cxcl12
Mfap5	1.88586649220013e-24	-0.637117058352081	0.044	0.35	2.61192509169718e-20	1	Mfap5
Tm4sf1.1	2.24091951256498e-24	-0.634532180739514	0.087	0.403	3.10367352490249e-20	1	Tm4sf1
Bgn	2.46110735091026e-24	-0.556033541106504	0.051	0.361	3.40863368101071e-20	1	Bgn
Rnase4	2.87522535811895e-24	-0.599230742418495	0.116	0.448	3.98218712099475e-20	1	Rnase4
Tsc22d1.1	2.97076572592474e-24	-0.525830552744175	0.058	0.37	4.11451053040576e-20	1	Tsc22d1
Scara5.1	5.42522394176569e-24	-0.455534791419538	0.011	0.302	7.51393515934549e-20	1	Scara5
Slc43a3	9.62601146211211e-24	0.451925336480188	0.396	0.158	1.33320258750253e-19	1	Slc43a3
Tshz2	2.22376700725645e-23	-0.421483336729733	0.029	0.324	3.07991730505019e-19	1	Tshz2
Ccl11.1	3.06258190304119e-23	-0.626070898656359	0.051	0.349	4.24167593571205e-19	1	Ccl11
Mmp2.1	3.72482679063003e-23	-0.697675938439402	0.171	0.465	5.15888510502258e-19	1	Mmp2
H3f3b	4.26482960908949e-23	0.512653593197034	0.669	0.468	5.90678900858894e-19	1	H3f3b
Gas6.1	6.15801636347274e-23	-0.602631966950902	0.033	0.325	8.52885266340975e-19	1	Gas6
Otud1	6.42757273808145e-23	0.255860334342653	0.196	0.042	8.9021882422428e-19	1	Otud1
Cst3.1	1.08270270048879e-22	-0.721514683800985	0.756	0.887	1.49954324017698e-18	1	Cst3
Hspb1.1	1.31969477831093e-22	-0.770236748746773	0.065	0.359	1.82777726796064e-18	1	Hspb1
Fabp5.1	1.48389137931059e-22	0.317201804562435	0.316	0.104	2.05518956034517e-18	1	Fabp5
Clec3b	2.17376801038371e-22	-0.796382542383838	0.029	0.31	3.01066869438144e-18	1	Clec3b
Dpep1.1	3.54588678343908e-22	-0.505946306571891	0.018	0.296	4.91105319506313e-18	1	Dpep1
Fbn1	3.9710281814798e-22	-0.611701424758578	0.058	0.346	5.49987403134953e-18	1	Fbn1
Crispld2.1	5.12776509114355e-22	-0.784045792149914	0.065	0.352	7.10195465123382e-18	1	Crispld2
Pltp	5.87308469572046e-22	-0.451594244947481	0.025	0.305	8.13422230357283e-18	1	Pltp
Gng11	6.6080954228904e-22	-0.455978979229444	0.076	0.372	9.1522121607032e-18	1	Gng11
Pdgfra.1	7.04955380726826e-22	-0.399616743775503	0.011	0.282	9.76363202306653e-18	1	Pdgfra
Plscr4	7.13957893657739e-22	0.279042474845076	0.287	0.092	9.88831682715969e-18	1	Plscr4
C1s.1	1.0865198962286e-21	-0.461028944243471	0.175	0.486	1.50483005627661e-17	1	C1s
Rplp1.1	1.40769675251309e-21	-0.402014671299202	0.825	0.927	1.94966000223063e-17	1	Rplp1
Matn2.1	2.06410670973027e-21	0.413993955134132	0.531	0.264	2.85878779297642e-17	1	Matn2
Dusp1	2.28612114918329e-21	-0.523884923398247	0.189	0.503	3.16627779161886e-17	1	Dusp1
Tgfbi.1	2.50437397880222e-21	-0.584223788720859	0.044	0.321	3.46855796064107e-17	1	Tgfbi
Abca8a.1	3.59515271564346e-21	0.419181577926073	0.607	0.343	4.9792865111662e-17	1	Abca8a
Igf1	3.96424293223272e-21	-0.513262526625563	0.025	0.296	5.49047646114232e-17	1	Igf1
Sdpr.1	6.34542651858661e-21	-0.721706273034256	0.055	0.331	8.78841572824245e-17	1	Sdpr
Gulp1	9.11993944894331e-21	0.313504925293237	0.313	0.113	1.26311161367865e-16	1	Gulp1
Rps3a1	1.34733205740556e-20	-0.395383681636286	0.269	0.585	1.8660548995067e-16	1	Rps3a1
Mgp	1.4901884278986e-20	-0.763421969732545	0.051	0.324	2.06391097263956e-16	1	Mgp
Dmd	1.62926005088767e-20	0.268631044794209	0.247	0.073	2.25652517047942e-16	1	Dmd
Ckb.1	1.72156645465359e-20	0.337239773874349	0.396	0.169	2.38436953969523e-16	1	Ckb
Abca8b.1	2.21524579932511e-20	0.371045261444162	0.371	0.155	3.06811543206527e-16	1	Abca8b
Htra1.1	2.87931996997353e-20	-0.426475283153447	0.087	0.376	3.98785815841334e-16	1	Htra1
Lamb2	2.88647163169347e-20	-0.36219984939149	0.084	0.37	3.99776320989545e-16	1	Lamb2
Esam.1	2.95789854114647e-20	-0.45649139416307	0.007	0.258	4.09668947948787e-16	1	Esam
Ppap2b	4.75005617183434e-20	-0.571763744566121	0.396	0.66	6.57882779799056e-16	1	Ppap2b
Lpl	5.18589624082412e-20	-0.661774105065553	0.033	0.295	7.18246629354141e-16	1	Lpl
Timp3.1	5.65976400793597e-20	0.399785551181684	0.807	0.604	7.83877315099132e-16	1	Timp3
S100a10	8.5028216141084e-20	-0.45093656652851	0.218	0.515	1.17764079355401e-15	1	S100a10
Rps14.1	1.02046398212283e-19	-0.404644378152428	0.742	0.887	1.41334261524012e-15	1	Rps14
Atf3	1.06159105544335e-19	0.700058212287519	0.545	0.298	1.47030361178904e-15	1	Atf3
Errfi1	1.29940786051876e-19	-0.585165260624701	0.051	0.312	1.79967988681848e-15	1	Errfi1
Prelp	1.84774320902237e-19	-0.336801104251566	0.015	0.261	2.55912434449598e-15	1	Prelp
Ogn	1.91473076683951e-19	-0.869294893631919	0.345	0.585	2.65190211207272e-15	1	Ogn
Apod.1	2.37498249190972e-19	-2.36412737899842	0.72	0.84	3.28935075129496e-15	1	Apod
Lum.1	2.47587558670416e-19	-1.37918259417182	0.335	0.554	3.42908768758527e-15	1	Lum
Ifitm2	2.60244106500328e-19	-0.347062262855924	0.353	0.673	3.60438087502955e-15	1	Ifitm2
Ntrk2	2.92279738033082e-19	0.305626170424383	0.345	0.137	4.04807437175818e-15	1	Ntrk2
Islr.1	6.07906074850298e-19	-0.406777207727591	0.073	0.341	8.41949913667663e-15	1	Islr
Rps3.1	6.57333961043612e-19	-0.382121148192821	0.487	0.76	9.10407536045403e-15	1	Rps3
Col8a1.1	7.8729271622449e-19	-0.442305677329235	0.015	0.255	1.09040041197092e-14	1	Col8a1
Vit.1	8.75738404605047e-19	-0.315697722139558	0.011	0.25	1.21289769037799e-14	1	Vit
Ctnna1.1	1.08570089935854e-18	0.395807273480896	0.484	0.261	1.50369574561158e-14	1	Ctnna1
Prrx1	1.15137738568799e-18	-0.400010333525085	0.018	0.257	1.59465767917787e-14	1	Prrx1
Ltbp4.1	1.98814419978169e-18	-0.456928196196776	0.069	0.325	2.75357971669764e-14	1	Ltbp4
Rps21.1	2.6542047916833e-18	-0.416505913791036	0.647	0.833	3.67607363648137e-14	1	Rps21
Mgst1	2.85076373268761e-18	-0.334693482233454	0.036	0.282	3.94830776977234e-14	1	Mgst1
Cyr61.1	3.25388510232675e-18	0.741317470107112	0.535	0.321	4.50663086672255e-14	1	Cyr61
Fstl1	3.3267708380359e-18	-0.585309584172624	0.291	0.561	4.60757761067973e-14	1	Fstl1
Ecm2	3.58557236246284e-18	-0.386972085545355	0.029	0.267	4.96601772201104e-14	1	Ecm2
Abi3bp.1	4.09550627504096e-18	-0.422901049063897	0.069	0.33	5.67227619093172e-14	1	Abi3bp
Neat1.1	5.76484410515578e-18	0.484254721182376	0.571	0.356	7.98430908564076e-14	1	Neat1
Efemp1.1	6.60441429189984e-18	-0.337926932431932	0.025	0.262	9.14711379428128e-14	1	Efemp1
Col3a1.1	6.90806522308509e-18	-1.4632061816917	0.753	0.772	9.56767033397285e-14	1	Col3a1
Egr2	6.93671098890571e-18	0.307809965507737	0.265	0.089	9.6073447196344e-14	1	Egr2
Zfp36	1.41677318609163e-17	0.472534688575801	0.862	0.681	1.9622308627369e-13	1	Zfp36
Sod3	1.47052201270853e-17	-0.302524872545912	0.022	0.252	2.03667298760131e-13	1	Sod3
Ace	1.48771477973355e-17	-0.27701157931656	0.011	0.237	2.06048496993097e-13	1	Ace
Il33.1	1.66724155618743e-17	-0.38547656832975	0.025	0.258	2.3091295553196e-13	1	Il33
Rps26.1	1.97625882077819e-17	-0.335520434503071	0.418	0.707	2.7371184667778e-13	1	Rps26
Nupr1.1	2.08963331108999e-17	-0.370944195861241	0.036	0.275	2.89414213585963e-13	1	Nupr1
Rps19	2.3244410493669e-17	-0.382318157190676	0.375	0.657	3.21935085337316e-13	1	Rps19
Rpl13a.1	2.58799896514963e-17	-0.350677441035585	0.669	0.846	3.58437856673224e-13	1	Rpl13a
Nbl1.1	2.82877308010237e-17	-0.402780966605593	0.015	0.238	3.91785071594178e-13	1	Nbl1
Tinagl1.1	3.20565706069166e-17	-0.420110318591199	0.022	0.249	4.43983502905795e-13	1	Tinagl1
Aebp1.1	3.66562163208923e-17	-0.575879736013624	0.196	0.448	5.07688596044359e-13	1	Aebp1
Dhrs1	3.82413156888942e-17	0.257958970999575	0.215	0.066	5.29642222291184e-13	1	Dhrs1
G0s2	5.12269797586306e-17	0.539750798844279	0.258	0.094	7.09493669657033e-13	1	G0s2
Cpxm2.1	5.19429323554125e-17	-0.356365209950099	0.007	0.224	7.19409613122463e-13	1	Cpxm2
Itm2b	5.37301418310721e-17	-0.345576050870684	0.844	0.933	7.44162464360348e-13	1	Itm2b
Rpl23	5.53396743534168e-17	-0.340466376478477	0.32	0.604	7.66454489794823e-13	1	Rpl23
AW112010	1.06504518138788e-16	-0.294388862907976	0.011	0.226	1.47508757622221e-12	1	AW112010
Aspn.1	1.31335666413367e-16	-0.473465025816875	0.015	0.231	1.81899897982513e-12	1	Aspn
Egr1.1	1.46166877012259e-16	0.49357493851512	0.909	0.768	2.02441124661979e-12	1	Egr1
Lrp1	1.46293002425237e-16	-0.341662151549547	0.084	0.33	2.02615808358954e-12	1	Lrp1
Ccdc80.1	1.94504690725007e-16	-0.54729415533256	0.025	0.245	2.69388996654135e-12	1	Ccdc80
Gadd45g.1	1.97139147440296e-16	-0.582574077046189	0.102	0.349	2.73037719204809e-12	1	Gadd45g
Pam	2.00328318485534e-16	-0.331809855106535	0.127	0.394	2.77454721102465e-12	1	Pam
Tmsb4x.1	2.13555276794749e-16	-0.803980795446518	0.825	0.852	2.95774058360728e-12	1	Tmsb4x
Rps15a	2.16666416063466e-16	-0.338117619703822	0.433	0.695	3.000829862479e-12	1	Rps15a
Il11ra1	2.22283270301326e-16	-0.418586265745622	0.051	0.282	3.07862329367337e-12	1	Il11ra1
Slfn5.1	2.97262660938473e-16	-0.304149669608861	0.007	0.216	4.11708785399785e-12	1	Slfn5
Ebf2.1	3.73277010979649e-16	-0.272100919766705	0.015	0.227	5.16988660206814e-12	1	Ebf2
Angptl7.1	3.7958037555568e-16	-1.07630571867445	0.033	0.248	5.25718820144617e-12	1	Angptl7
Jam2	4.6277572916311e-16	-0.261199187513448	0.011	0.22	6.40944384890907e-12	1	Jam2
Gpr116.1	4.63702788414528e-16	-0.47468456060325	0.036	0.255	6.42228361954121e-12	1	Gpr116
Actn4.1	5.06530169954543e-16	-0.375429727620768	0.113	0.359	7.01544285387042e-12	1	Actn4
Ccnd2	5.5024028996222e-16	-0.260436711626961	0.015	0.226	7.62082801597675e-12	1	Ccnd2
Fxyd5	6.4718290730617e-16	-0.304340408754897	0.015	0.224	8.96348326619046e-12	1	Fxyd5
Procr.1	7.56178100828719e-16	-0.332924837800444	0.022	0.235	1.04730666964778e-11	1	Procr
Cox6c.1	7.74459453309348e-16	-0.345576050870684	0.411	0.669	1.07262634283345e-11	1	Cox6c
Rpl13	8.00047912647925e-16	-0.316544218190022	0.305	0.57	1.10806635901738e-11	1	Rpl13
Nid1.1	8.29288414899977e-16	-0.447119094573535	0.182	0.431	1.14856445463647e-11	1	Nid1
Nudt4.1	1.13632393440258e-15	0.390250857014334	0.404	0.209	1.57380864914758e-11	1	Nudt4
Rps3a3	1.39849870987223e-15	-0.336077494801031	0.138	0.391	1.93692071317304e-11	1	Rps3a3
Tmsb10	1.84915142958759e-15	-0.359063135209908	0.316	0.58	2.56107472997882e-11	1	Tmsb10
Tppp3	2.22579435091444e-15	-0.365551183751416	0.084	0.313	3.08272517601649e-11	1	Tppp3
Mylk	2.24445154288183e-15	-0.45435891601667	0.022	0.229	3.10856538689133e-11	1	Mylk
Rps15.1	2.35098193390219e-15	-0.347555251247893	0.593	0.783	3.25610997845454e-11	1	Rps15
Enpp2.1	2.62281004888878e-15	-0.452166546094789	0.04	0.251	3.63259191771095e-11	1	Enpp2
Tspan13.1	2.66676457687719e-15	-0.397237660428991	0.015	0.216	3.69346893897491e-11	1	Tspan13
Dpt.1	2.88973729285247e-15	-0.735898879331666	0.029	0.235	4.00228615060067e-11	1	Dpt
Steap4	3.07164215888742e-15	-0.263216633163001	0.004	0.197	4.25422439005908e-11	1	Steap4
Cygb	3.66456469185737e-15	-0.33125189721788	0.025	0.231	5.07542209822245e-11	1	Cygb
Ctsh	4.31217068509077e-15	-0.266385252946242	0	0.189	5.97235639885072e-11	1	Ctsh
Col6a3	5.05448437588534e-15	-0.297452585140157	0.033	0.241	7.0004608606012e-11	1	Col6a3
Adamts1	5.53845846275422e-15	-0.49377287971989	0.113	0.344	7.67076497091459e-11	1	Adamts1
Rps11.1	5.87295814264716e-15	-0.349094412383596	0.353	0.625	8.13404702756632e-11	1	Rps11
Ptprb.1	6.0568923535187e-15	-0.43050791513992	0.022	0.222	8.38879590962340e-11	1	Ptprb
Meox2	6.16814806736201e-15	-0.252509446118574	0.015	0.212	8.54288507329639e-11	1	Meox2
Egfl7.1	6.52587390891115e-15	-0.581019880266545	0.073	0.284	9.03833536384194e-11	1	Egfl7
Rpl37a.1	6.76403979294428e-15	-0.345503034186339	0.455	0.698	9.36819511322782e-11	1	Rpl37a
Mfge8	8.23298117231105e-15	-0.276317503806451	0.04	0.253	1.14026789236508e-10	1	Mfge8
Medag	8.68263419427273e-15	-0.264835555156832	0.015	0.21	1.20254483590677e-10	1	Medag
Qk.1	1.37714746261713e-14	0.31147108695212	0.436	0.238	1.90734923572473e-10	1	Qk
Adamts2	1.50950700224957e-14	-0.2938418019791	0.04	0.248	2.09066719811566e-10	1	Adamts2
Olfml3.1	1.80788215542951e-14	-0.299592538877834	0.029	0.23	2.50391678526988e-10	1	Olfml3
Fcgrt	1.85209249122807e-14	-0.255957845336089	0.124	0.361	2.56514810035087e-10	1	Fcgrt
Pecam1.1	2.19652668710628e-14	-0.421394887428035	0.033	0.231	3.04218946164219e-10	1	Pecam1
Tagln.1	2.51870678165064e-14	-0.814499738636849	0.022	0.214	3.48840889258614e-10	1	Tagln
Nfib.1	2.66671468282862e-14	-0.355022511246267	0.167	0.41	3.69339983571764e-10	1	Nfib
Srgn.1	2.68660755381275e-14	-0.394626088315141	0.055	0.259	3.72095146203066e-10	1	Srgn
Serpine2	3.14171039158616e-14	-0.311705759739692	0.036	0.241	4.35126889234683e-10	1	Serpine2
Sdc2.1	3.47912008140219e-14	-0.286439579022107	0.065	0.279	4.81858131274204e-10	1	Sdc2
Naalad2.1	3.631189064704e-14	-0.255446907669924	0.018	0.21	5.02919685461504e-10	1	Naalad2
Thbs4.1	4.51368325336143e-14	-0.350148179914034	0.025	0.217	6.25145130590558e-10	1	Thbs4
Eef1b2	5.12281065804297e-14	-0.283124487012311	0.189	0.436	7.09509276138952e-10	1	Eef1b2
Cd47	5.95610763818907e-14	-0.271120093075766	0.2	0.458	8.24920907889186e-10	1	Cd47
Calm1.1	6.66546762574268e-14	-0.47813040384738	0.6	0.754	9.23167266165362e-10	1	Calm1
Rps5.1	8.53459496634829e-14	-0.322874237683914	0.535	0.737	1.18204140283924e-09	1	Rps5
Nr2f2	8.69524511515996e-14	0.340926935964992	0.473	0.274	1.20429144844965e-09	1	Nr2f2
Eef1a1	1.00277443929883e-13	-0.282865126952136	0.56	0.769	1.38884259842887e-09	1	Eef1a1
Rhoj.1	1.03498346225957e-13	-0.262848020724446	0.095	0.322	1.43345209522951e-09	1	Rhoj
Col5a1.1	1.13546494589764e-13	-0.30557863864923	0.105	0.328	1.57261895006824e-09	1	Col5a1
Hspa1b.1	1.23662542890259e-13	0.490071192296545	0.451	0.259	1.71272621903009e-09	1	Hspa1b
Ptrf	1.30814783358979e-13	-0.338002610586133	0.345	0.591	1.81178474952186e-09	1	Ptrf
Col15a1.1	1.43020493950345e-13	-0.637503538197324	0.185	0.392	1.98083384121227e-09	1	Col15a1
Filip1l.1	1.57045534351059e-13	-0.501789144147455	0.047	0.242	2.17508065076217e-09	1	Filip1l
C130074G19Rik.1	1.76303668851866e-13	-0.337062519773024	0.022	0.205	2.44180581359834e-09	1	C130074G19Rik
Rpl22.1	1.97325810683285e-13	-0.32452837349795	0.342	0.6	2.7329624779635e-09	1	Rpl22
Cd302.1	2.29834015147236e-13	-0.325851545522905	0.12	0.344	3.18320110978922e-09	1	Cd302
Lbp	2.52154419460049e-13	-0.281037529733112	0.015	0.193	3.49233870952168e-09	1	Lbp
Rpl32.1	3.21592810797685e-13	-0.302154453174035	0.556	0.757	4.45406042954794e-09	1	Rpl32
Atox1	3.38485770272288e-13	-0.277145785921498	0.175	0.412	4.68802791827118e-09	1	Atox1
Cfh.1	3.70236360532715e-13	-0.510234152760399	0.015	0.19	5.1277735933781e-09	1	Cfh
Rcn3.1	3.76021428185639e-13	-0.339142465177092	0.211	0.443	5.2078967803711e-09	1	Rcn3
Tnxb	3.78937532756538e-13	-0.255996385189514	0.007	0.179	5.24828482867805e-09	1	Tnxb
Rps24.1	3.86405967352864e-13	-0.351758925953245	0.662	0.796	5.35172264783716e-09	1	Rps24
Angptl1	4.0157764288915e-13	-0.345688860391927	0.007	0.178	5.56185035401473e-09	1	Angptl1
Fbln2	4.28328821987871e-13	-0.396645638324296	0.185	0.408	5.93235418453202e-09	1	Fbln2
Mustn1.1	4.41177767143047e-13	-0.359299293035654	0.011	0.185	6.1103120749312e-09	1	Mustn1
Fbln1.1	4.93405030225543e-13	-0.3652073584113	0.007	0.178	6.83365966862377e-09	1	Fbln1
Emcn.1	4.94513781585609e-13	-0.277054342346818	0.015	0.19	6.84901587496069e-09	1	Emcn
Rps8	5.11855929291151e-13	-0.29160047689743	0.287	0.53	7.08920462068244e-09	1	Rps8
Abcg2.1	6.60598865087248e-13	-0.353766104840728	0.033	0.213	9.14929428145839e-09	1	Abcg2
Rasgrp2.1	6.85721146558723e-13	-0.297024044315085	0.033	0.215	9.49723787983832e-09	1	Rasgrp2
Abcb1a.1	7.68174676050064e-13	-0.455693362239883	0.015	0.186	1.06392192632934e-08	1	Abcb1a
Rpl39	7.9156648355045e-13	-0.277486809941537	0.404	0.666	1.09631957971737e-08	1	Rpl39
Cd248	8.84235867553426e-13	-0.285105331952438	0.004	0.167	1.2246666765615e-08	1	Cd248
Flt1.1	8.87469588723757e-13	-0.450019373075979	0.04	0.223	1.2291453803824e-08	1	Flt1
Crip1.1	9.3679651286887e-13	-0.626298430471164	0.68	0.803	1.29746317032338e-08	1	Crip1
Cp.1	1.31383319733765e-12	-0.840653317668535	0.182	0.377	1.81965897831265e-08	1	Cp
Myl9	1.89029998103465e-12	-0.733351450629556	0.087	0.284	2.61806547373299e-08	1	Myl9
Pamr1.1	2.24623220969448e-12	-0.255361041687588	0.033	0.21	3.11103161042686e-08	1	Pamr1
Myl6.1	2.59614944820984e-12	-0.35341736466108	0.247	0.477	3.59566698577063e-08	1	Myl6
Rps28	2.75319143409047e-12	-0.250189488959376	0.193	0.426	3.8131701362153e-08	1	Rps28
Rps4x	3.30893887648438e-12	-0.280122477053738	0.291	0.521	4.58288034393087e-08	1	Rps4x
Rpl4.1	5.08577592390254e-12	-0.304968909088944	0.545	0.744	7.04379965460502e-08	1	Rpl4
Sptbn1.1	5.87354776985644e-12	0.356193030084093	0.742	0.656	8.13486366125117e-08	1	Sptbn1
Pcp4l1.1	6.23576648165233e-12	-0.336903685965797	0.015	0.177	8.63653657708848e-08	1	Pcp4l1
Gas1.1	6.82763127272998e-12	-0.369336357931455	0.029	0.195	9.45626931273103e-08	1	Gas1
Kitl	7.05902633737132e-12	-0.254965289423337	0.069	0.26	9.77675147725927e-08	1	Kitl
Col4a2	8.80117207928923e-12	-0.258264657113161	0.113	0.317	1.21896233298156e-07	1	Col4a2
Ndrg2	1.07726459969836e-11	0.28618285758753	0.331	0.172	1.49201147058223e-07	1	Ndrg2
Cdh5.1	1.15940591966356e-11	-0.254110279341324	0.033	0.201	1.60577719873403e-07	1	Cdh5
Gpx1	1.18345286477775e-11	-0.312848066505049	0.236	0.451	1.63908221771719e-07	1	Gpx1
Epas1.1	1.40687138086097e-11	-0.263144842046403	0.036	0.206	1.94851686249245e-07	1	Epas1
Lsp1	1.53933358440379e-11	-0.264170729521216	0.025	0.188	2.13197701439926e-07	1	Lsp1
Abca9.1	2.06948255677672e-11	-0.250905820937027	0.047	0.223	2.86623334113575e-07	1	Abca9
Arpc1a	2.08142973642698e-11	0.299445456329356	0.324	0.175	2.88278018495137e-07	1	Arpc1a
Cd36.1	2.30302952564011e-11	-0.67566321722622	0.033	0.193	3.18969589301155e-07	1	Cd36
Ier2.1	2.5014621491886e-11	0.376651316445553	0.764	0.597	3.46452507662621e-07	1	Ier2
8430408G22Rik.1	2.92776415778658e-11	-0.360805474388022	0.011	0.161	4.05495335853441e-07	1	8430408G22Rik
Ackr3	3.02905610312039e-11	-0.255719721748823	0.04	0.207	4.19524270282174e-07	1	Ackr3
Myoc.1	4.07719090204444e-11	-0.413629877352568	0.018	0.171	5.64690939933155e-07	1	Myoc
Ppp1r15a.1	4.18682545609315e-11	-0.435095440879011	0.175	0.376	5.79875325668901e-07	1	Ppp1r15a
Celf2	4.44672735223582e-11	0.305361209894159	0.36	0.203	6.15871738284661e-07	1	Celf2
Rpl37.1	4.71668679798844e-11	-0.277844824626554	0.458	0.669	6.53261121521399e-07	1	Rpl37
Ctla2a.1	7.17490136238215e-11	-0.271167552794339	0.015	0.162	9.93723838689928e-07	1	Ctla2a
Pcolce2.1	9.87137342580012e-11	-0.352207064726162	0.018	0.166	1.36718521947332e-06	1	Pcolce2
Col1a1.1	1.12210943155644e-10	-1.08095791810746	0.698	0.686	1.55412156270567e-06	1	Col1a1
Edn1.1	1.24559357894538e-10	-0.467072421651728	0.015	0.158	1.72514710683935e-06	1	Edn1
Rpl8.1	1.53603475075376e-10	-0.252965510954426	0.498	0.713	2.12740812979396e-06	1	Rpl8
Itm2a.1	1.69944830399955e-10	-0.408348571641151	0.207	0.397	2.35373590103937e-06	1	Itm2a
Sfrp4.1	1.91499563322784e-10	-0.884592686709936	0.047	0.202	2.65226895202056e-06	1	Sfrp4
D4Wsu53e	2.51852014291653e-10	0.300721220372196	0.716	0.655	3.4881503979394e-06	1	D4Wsu53e
Tgfbr3	2.99180241991743e-10	0.319157859677309	0.411	0.264	4.14364635158564e-06	1	Tgfbr3
Sncg.1	3.04929290901614e-10	-0.280159951791753	0.033	0.181	4.22327067898735e-06	1	Sncg
Maf	3.71807953507916e-10	-0.273035802473905	0.065	0.228	5.14954015608464e-06	1	Maf
Bsg.1	4.43981607071839e-10	-0.483438988201301	0.407	0.604	6.14914525794497e-06	1	Bsg
Gsn	4.69291060214094e-10	-1.41326890062742	0.876	0.839	6.49968118396521e-06	1	Gsn
Cldn5.1	6.21126621798973e-10	-0.603365983167911	0.018	0.154	8.60260371191578e-06	1	Cldn5
Rplp2.1	1.12675640911143e-09	-0.274645328986623	0.633	0.778	1.56055762661933e-05	1	Rplp2
Abca6.1	1.25536183656372e-09	-0.299799806188635	0.051	0.201	1.73867614364076e-05	1	Abca6
Thbs1.1	1.332314229352e-09	-0.263019024230434	0.025	0.164	1.84525520765252e-05	1	Thbs1
Fth1.1	2.35928825487053e-09	0.298850924852757	0.982	0.977	3.26761423299569e-05	1	Fth1
Penk	4.53047068714022e-09	-0.252660339582272	0.004	0.12	6.2747019016892e-05	1	Penk
Ubc	6.73940755983815e-09	0.32834808427456	0.796	0.71	9.33407947037584e-05	1	Ubc
Slc2a1.1	7.27480965447850e-09	-0.256355998641625	0.018	0.142	0.000100756113714527	1	Slc2a1
Nr4a1	9.48864334908778e-09	0.268321758035121	0.545	0.376	0.000131417710384866	1	Nr4a1
Aqp1.1	1.34205178312358e-08	-0.564764422341965	0.033	0.158	0.000185874171962616	1	Aqp1
Tpm2.1	1.93367862199993e-08	-0.662238015841646	0.033	0.159	0.00026781448914699	1	Tpm2
Osr2.1	2.10963228081888e-08	-0.255085290223487	0.025	0.147	0.000292184070893415	1	Osr2
Rpl26	2.11725787018834e-08	-0.251862040599181	0.095	0.243	0.000293240215021084	1	Rpl26
Tpm1.1	2.31057669327916e-08	-0.540149209332127	0.236	0.412	0.000320014872019164	1	Tpm1
Cald1	3.37172197788333e-08	-0.427114074032108	0.28	0.461	0.000466983493936842	1	Cald1
Plvap.1	4.40553960361998e-08	-0.529212389661253	0.033	0.152	0.000610167235101367	1	Plvap
Ctsb.1	4.46559430503953e-08	-0.292836336120731	0.4	0.565	0.000618484811247974	1	Ctsb
Gdf10.1	4.73765402660422e-08	-0.269278009326206	0.011	0.119	0.000656165082684684	1	Gdf10
Ppp2r2a	5.44980721459191e-08	0.252669702470055	0.28	0.158	0.000754798299220979	1	Ppp2r2a
Fabp4.1	6.06177550411611e-08	-1.59798447229621	0.265	0.403	0.000839555907320081	1	Fabp4
Lrg1.1	8.13617642374608e-08	-0.317981044924797	0.011	0.116	0.00112686043468883	1	Lrg1
Myh11.1	9.16163687669894e-08	-0.589302183384358	0.011	0.114	0.0012688867074228	1	Myh11
Gpx3.1	9.19581497147966e-08	-0.283251389393133	0.018	0.127	0.00127362037354993	1	Gpx3
Dst.1	9.38489719602226e-08	0.280091499348578	0.353	0.229	0.00129980826164908	1	Dst
Spock2	1.00908979228073e-07	-0.276114718269896	0.018	0.126	0.00139758936230881	1	Spock2
Gadd45b	1.89718376891938e-07	-0.250416100166018	0.029	0.14	0.00262759951995334	1	Gadd45b
Gnas.1	1.94653071848674e-07	-0.28673555084775	0.825	0.889	0.00269594504510414	1	Gnas
Pi16.1	1.98191016069079e-07	-0.656139214650412	0.04	0.153	0.00274494557255675	1	Pi16
Rgs5.1	2.34922994915594e-07	-0.649134667393663	0.022	0.126	0.00325368347958097	1	Rgs5
Fosb.1	3.19058427624607e-07	0.36084658664228	0.695	0.542	0.00441895922260081	1	Fosb
Serpinh1.1	4.36115741157798e-07	-0.266589393985726	0.458	0.605	0.0060402030150355	1	Serpinh1
Arl6ip1	5.85115337724252e-07	0.28747500255614	0.356	0.241	0.00810384742748089	1	Arl6ip1
Hspa5.1	6.73516956877318e-07	-0.250626624260192	0.585	0.715	0.00932820985275086	1	Hspa5
Acta2.1	6.86110600913381e-07	-1.03196815205639	0.091	0.21	0.00950263182265032	1	Acta2
Sfrp2.1	1.14958890843553e-06	-0.544611390477378	0.036	0.138	0.0159218063818321	1	Sfrp2
Col1a2.1	1.20304881236293e-06	-1.05383947425111	0.884	0.771	0.0166622260512266	1	Col1a2
Cdkn1a	1.26669502765208e-06	-0.254736195729044	0.065	0.184	0.0175437261329813	1	Cdkn1a
Rnd3.1	1.27579285232642e-06	0.276378037292708	0.265	0.159	0.0176697310047209	1	Rnd3
Inmt.1	1.29093504912486e-06	-0.50523686154307	0.022	0.117	0.0178794504303793	1	Inmt
Fermt2	1.5231836914672e-06	0.250721303699344	0.425	0.31	0.0210960941268207	1	Fermt2
Lgals1	2.36717923227287e-06	0.271654146985888	0.695	0.586	0.0327854323669792	1	Lgals1
Serping1	3.90115533882142e-06	-0.499122436091062	0.618	0.637	0.0540310014426766	1	Serping1
Tmem50a	4.25370788157044e-06	0.271148540671392	0.509	0.443	0.0589138541597506	1	Tmem50a
Sfrp1.1	7.33564431652563e-06	-0.283902274888536	0.058	0.16	0.10159867378388	1	Sfrp1
Trf.1	2.10819956913168e-05	-0.250160291168673	0.044	0.132	0.291985640324738	1	Trf
Son	3.71140257402573e-05	0.254779318082195	0.611	0.551	0.514029256502563	1	Son
Mt2	4.87842702891145e-05	-0.255660639299247	0.175	0.294	0.675662143504236	1	Mt2
Cxcl1.1	6.41820327464776e-05	-0.517998226600464	0.124	0.22	0.888921153538715	1	Cxcl1
Zfp36l1	9.05175497435299e-05	0.2835033822026	0.549	0.482	1	1	Zfp36l1
Ehd4.1	0.000408908648831755	-0.26940294550028	0.131	0.219	1	1	Ehd4
Dnajb1.1	0.00122240781782856	0.256235619161426	0.378	0.31	1	1	Dnajb1
Ier3.1	0.0037919197215844	-0.364949501983455	0.193	0.266	1	1	Ier3
Gdf10.2	1.72064427183732e-143	1.10116641745554	0.646	0.048	2.38309231649469e-139	2	Gdf10
Dpt.2	1.44562344381419e-137	1.31469249193394	0.904	0.135	2.00218846968265e-133	2	Dpt
Fbln1.2	1.02026100654818e-123	0.968626633462485	0.753	0.093	1.41306149406923e-119	2	Fbln1
Cxcl14	6.81879505633934e-118	1.47921831173671	0.528	0.039	9.44403115302999e-114	2	Cxcl14
C3.1	2.90903932300354e-111	1.21436828132757	0.815	0.135	4.0290194623599e-107	2	C3
Clec3b.1	4.02689546491878e-109	1.15275021424977	0.938	0.203	5.57725021891251e-105	2	Clec3b
Gas1.2	2.79489662432674e-105	0.978817205306602	0.736	0.114	3.87093182469254e-101	2	Gas1
Dkk2	1.36488468613021e-100	0.978650554511054	0.455	0.032	1.89036529029034e-96	2	Dkk2
Penk.1	1.83849435735172e-96	0.760984296747028	0.551	0.059	2.54631468493214e-92	2	Penk
Cygb.1	5.11655980145476e-89	0.888349980297181	0.736	0.148	7.08643532501485e-85	2	Cygb
Lpl.1	4.14726784547742e-88	1.49718754523327	0.798	0.203	5.74396596598622e-84	2	Lpl
Fst.1	5.03657198027084e-87	0.842049046709391	0.629	0.094	6.97565219267511e-83	2	Fst
Ccdc80.2	1.08212331431147e-84	1.1319652790396	0.747	0.16	1.49874079032139e-80	2	Ccdc80
Gsn.1	1.48495414252454e-84	1.56935496430184	1	0.829	2.05666148739649e-80	2	Gsn
Ifi205	1.00383093624885e-83	0.335279752352832	0.326	0.015	1.39030584670466e-79	2	Ifi205
Hmcn2	8.48543729784544e-77	0.509235152034372	0.376	0.029	1.17523306575159e-72	2	Hmcn2
Inmt.2	8.26117459556551e-76	1.31765814266116	0.494	0.064	1.14417268148582e-71	2	Inmt
Svep1	1.03020174180414e-70	0.467876433863588	0.483	0.061	1.42682941239873e-66	2	Svep1
Mfap4	7.96530937170559e-70	0.599522900768476	0.438	0.049	1.10319534798122e-65	2	Mfap4
Adh1	1.63278921504279e-69	0.572197180801495	0.478	0.065	2.26141306283426e-65	2	Adh1
Prrx1.1	9.34713167580478e-66	0.7183392357292	0.708	0.174	1.29457773709896e-61	2	Prrx1
Igf1.1	7.6020308100281e-65	0.889556862132322	0.742	0.208	1.05288126718889e-60	2	Igf1
Il11ra1.1	8.48062257657948e-65	0.724426968065556	0.742	0.199	1.17456622685626e-60	2	Il11ra1
Bmper	3.54297318029214e-63	0.340339738482067	0.287	0.019	4.90701785470461e-59	2	Bmper
Cilp	5.26290170325484e-63	0.746438598806295	0.388	0.044	7.28911885900796e-59	2	Cilp
Lrp1.1	5.32988649776974e-62	0.681118030476701	0.787	0.245	7.3818927994111e-58	2	Lrp1
Ifi204	1.5163694136485e-60	0.54429876002906	0.483	0.079	2.10017163790318e-56	2	Ifi204
C4b.2	2.09454332141008e-60	0.722017223569393	0.539	0.101	2.90094250015296e-56	2	C4b
Col14a1.1	9.18262668300682e-59	0.516375155094764	0.556	0.1	1.27179379559644e-54	2	Col14a1
Ly6a.2	1.66616688398635e-58	0.972880827240714	0.893	0.356	2.3076411343211e-54	2	Ly6a
Pcolce2.2	7.5837171608186e-58	0.543649479625339	0.562	0.103	1.05034482677338e-53	2	Pcolce2
Gpx3.2	1.62511286617433e-57	0.894982743445727	0.461	0.076	2.25078131965144e-53	2	Gpx3
Sfrp2.2	8.65857750478122e-57	1.4571075281907	0.483	0.087	1.1992129844122e-52	2	Sfrp2
Tnxb.1	1.01641955897794e-56	0.545737954328806	0.562	0.113	1.40774108918445e-52	2	Tnxb
Mmp3	3.42063087323195e-56	0.379517291333402	0.247	0.015	4.73757375942625e-52	2	Mmp3
Igfbp4.2	3.06464996875007e-55	0.934739182929075	0.888	0.384	4.24454020671885e-51	2	Igfbp4
Bgn.1	6.10605374413467e-53	0.72451323817733	0.787	0.269	8.45688443562651e-49	2	Bgn
Sfrp1.2	6.58036600174412e-53	0.914268569314862	0.517	0.108	9.11380691241561e-49	2	Sfrp1
Rnase4.1	8.07524037941522e-53	0.819003049914736	0.871	0.353	1.11842079254901e-48	2	Rnase4
C1ra	1.86049671226169e-52	0.705627862712772	0.753	0.26	2.57678794648243e-48	2	C1ra
Serping1.1	3.54600592419889e-52	0.830500447310407	0.978	0.6	4.91121820501546e-48	2	Serping1
Tmeff2	4.52215807230786e-51	0.352206548546901	0.36	0.047	6.26318893014638e-47	2	Tmeff2
Htra3	3.97224994468736e-50	0.496940832548617	0.534	0.115	5.50156617339199e-46	2	Htra3
Cfb	1.10074274138247e-49	0.281324553487155	0.27	0.024	1.52452869681472e-45	2	Cfb
Ltbp4.2	4.78070784380901e-49	0.666553118673718	0.73	0.243	6.62128036367548e-45	2	Ltbp4
Acvr2a	6.87687263192195e-49	0.366088435486592	0.343	0.046	9.5244685952119e-45	2	Acvr2a
Fbln5	1.33543292502517e-47	0.542926913155884	0.483	0.104	1.84957460115985e-43	2	Fbln5
Dapk1	4.8984813185172e-47	0.300765233618868	0.326	0.042	6.78439662614633e-43	2	Dapk1
Fstl1.1	1.1639787944201e-46	0.780301997615203	0.91	0.483	1.61211063027184e-42	2	Fstl1
Ogn.1	1.85996418308077e-46	0.798793097202412	0.944	0.511	2.57605039356687e-42	2	Ogn
Loxl1	4.18437673347796e-45	0.435001506446487	0.5	0.109	5.79536177586698e-41	2	Loxl1
Sfrp4.2	2.32004025132045e-42	0.708940404382908	0.556	0.142	3.21325574807882e-38	2	Sfrp4
C7	3.74563876076783e-42	0.409179395512655	0.27	0.031	5.18770968366345e-38	2	C7
Cd248.1	5.33189722361582e-42	0.441066777617154	0.489	0.109	7.38467765470792e-38	2	Cd248
Sod3.1	2.48712020234473e-41	0.454874064372535	0.612	0.18	3.44466148024745e-37	2	Sod3
Igsf10	8.72306235614156e-41	0.335552113641764	0.292	0.039	1.20814413632561e-36	2	Igsf10
Serpinf1.2	5.63136960444488e-40	0.581080774570095	0.888	0.386	7.79944690215616e-36	2	Serpinf1
Steap4.1	9.2773891332014e-38	0.449835833307991	0.506	0.135	1.28491839494839e-33	2	Steap4
Fndc1	1.39308925852838e-37	0.347118841763078	0.404	0.081	1.9294286230618e-33	2	Fndc1
Osr1	1.88697371701628e-37	0.324264705440044	0.303	0.047	2.61345859806755e-33	2	Osr1
Fgf7	3.152005086127e-37	0.339470157943053	0.326	0.055	4.3655270442859e-33	2	Fgf7
Thbs3	9.28725710843689e-37	0.320795643126974	0.343	0.063	1.28628510951851e-32	2	Thbs3
Ctsl	2.10491633668432e-36	0.591752544187448	0.921	0.546	2.91530912630778e-32	2	Ctsl
AI607873	4.39777103442788e-36	0.315314125153211	0.292	0.045	6.09091288268261e-32	2	AI607873
Col3a1.2	7.65852202309044e-36	0.772746958458352	0.989	0.747	1.06070530019803e-31	2	Col3a1
Pcolce.2	9.80410786113043e-36	0.593263436069098	0.815	0.36	1.35786893876656e-31	2	Pcolce
Timp2.1	1.0376781441394e-35	0.650246685495202	0.893	0.513	1.43718422963307e-31	2	Timp2
C1s.2	3.46508129499552e-35	0.563003426500687	0.837	0.402	4.7991375935688e-31	2	C1s
Nfix	7.72346446328868e-35	0.406324085548401	0.5	0.139	1.06969982816548e-30	2	Nfix
Fbn1.1	8.0203807806342e-35	0.533986852978561	0.697	0.266	1.11082273811784e-30	2	Fbn1
Chrdl1.1	4.20465784517936e-34	0.470027941103284	0.472	0.123	5.82345111557342e-30	2	Chrdl1
Lox.1	1.32792756038543e-33	0.387275890577706	0.343	0.066	1.83917967113383e-29	2	Lox
Gas6.2	2.47310854252233e-33	0.726250254420921	0.646	0.246	3.42525533139343e-29	2	Gas6
2810055G20Rik	8.5965125127207e-33	0.414965521943741	0.438	0.114	1.19061698301182e-28	2	2810055G20Rik
Arhgap20	6.3888310762722e-32	0.287079965057775	0.303	0.055	8.84853104063699e-28	2	Arhgap20
Csf1	5.52471718769526e-31	0.320791841019085	0.399	0.1	7.65173330495794e-27	2	Csf1
Scara5.2	1.63087162419918e-30	0.550445420681035	0.601	0.226	2.25875719951586e-26	2	Scara5
Col1a2.2	3.18167650979829e-30	0.536712307155697	1	0.766	4.40662196607064e-26	2	Col1a2
Cxcl13	6.16377135907917e-30	0.525521513999197	0.202	0.025	8.53682333232464e-26	2	Cxcl13
Man1a	6.86932918218696e-30	0.363798904752217	0.416	0.111	9.51402091732894e-26	2	Man1a
S100a10.1	2.8326396273351e-29	0.590165185646251	0.803	0.439	3.92320588385911e-25	2	S100a10
Nfib.2	8.17040156550891e-29	0.508713879836667	0.736	0.339	1.13160061682298e-24	2	Nfib
Pdgfra.2	1.93986052094459e-28	0.379783316317135	0.59	0.208	2.68670682150826e-24	2	Pdgfra
Anpep	5.22584247916192e-28	0.250952814841728	0.27	0.049	7.23779183363926e-24	2	Anpep
Nrp1.2	6.25639231007877e-28	0.47790316710705	0.669	0.275	8.6651033494591e-24	2	Nrp1
Pi16.2	7.64044068734082e-28	0.526721369221773	0.41	0.109	1.0582010351967e-23	2	Pi16
Ecm1.2	7.82577161857037e-28	0.616376697962642	0.725	0.331	1.083869369172e-23	2	Ecm1
Col6a1.2	1.28615276371505e-27	0.496464130315398	0.742	0.338	1.78132157774534e-23	2	Col6a1
Lrrn4cl	1.53580943136304e-27	0.319250092780191	0.309	0.068	2.12709606243781e-23	2	Lrrn4cl
Mfap5.1	4.0352993459088e-27	0.406605775132311	0.674	0.27	5.58888959408368e-23	2	Mfap5
Angpt1	4.69313391586405e-27	0.273874705276994	0.197	0.027	6.4999904734717e-23	2	Angpt1
Dpep1.2	1.17451975296274e-26	0.362440555996106	0.601	0.222	1.6267098578534e-22	2	Dpep1
Slit3	3.66388424404627e-26	0.250090314273576	0.292	0.063	5.07447967800408e-22	2	Slit3
Rbp1	3.93007741760523e-26	0.327161118079531	0.348	0.087	5.44315722338324e-22	2	Rbp1
Gm26771	4.94765546938053e-26	0.523188173259115	0.18	0.023	6.85250282509204e-22	2	Gm26771
F3	6.59589646146734e-26	0.596350318984198	0.416	0.132	9.13531659913227e-22	2	F3
Lrrc17	2.54479422241264e-25	0.269936431611006	0.365	0.098	3.5245399980415e-21	2	Lrrc17
Bicc1.1	3.43307994331683e-25	0.419643648530687	0.534	0.2	4.75481572149381e-21	2	Bicc1
Col6a2.2	7.07522421061372e-25	0.506357228374159	0.685	0.316	9.79918553170001e-21	2	Col6a2
Man2a1	3.42000847768596e-24	0.298064084960311	0.32	0.081	4.73671174159506e-20	2	Man2a1
Mgst1.1	5.19934396267131e-24	0.43248906698909	0.539	0.218	7.20109138829977e-20	2	Mgst1
Gja1	5.29431774190768e-24	0.32235358539722	0.421	0.132	7.33263007254214e-20	2	Gja1
Cd302.2	7.08311486408061e-24	0.467476465662956	0.635	0.279	9.81011408675165e-20	2	Cd302
Col1a1.2	6.64297889372055e-23	0.426035894788932	0.972	0.659	9.20052576780297e-19	2	Col1a1
Col6a3.1	7.94071903458856e-23	0.439749220887933	0.483	0.184	1.09978958629052e-18	2	Col6a3
Bmp1	8.17764841764509e-23	0.279571397357895	0.393	0.12	1.13260430584384e-18	2	Bmp1
Col5a2.1	1.06089365547585e-22	0.457338518894625	0.719	0.361	1.46933771283405e-18	2	Col5a2
Ddr2	1.720755021942e-22	0.282625614708395	0.36	0.103	2.38324570538967e-18	2	Ddr2
Errfi1.1	1.74142741626897e-22	0.36443450508138	0.596	0.243	2.41187697153252e-18	2	Errfi1
Frmd6	3.64533312569682e-22	0.366286516119486	0.461	0.167	5.04878637909009e-18	2	Frmd6
Fn1.1	8.48708610177096e-22	0.660784676057856	0.697	0.363	1.17546142509528e-17	2	Fn1
Plau	1.43993301473896e-21	0.250650852404845	0.275	0.067	1.99430722541346e-17	2	Plau
Ntrk2.1	4.30133579474821e-21	0.266100174588581	0.421	0.141	5.95735007572626e-17	2	Ntrk2
Col5a1.2	4.70985689601159e-21	0.346551409998362	0.601	0.266	6.52315180097605e-17	2	Col5a1
Camk2n1	6.70019212077598e-21	0.294725842326377	0.354	0.11	9.27976608727473e-17	2	Camk2n1
Lsp1.1	2.55184191545205e-20	0.28578017841113	0.416	0.14	3.5343010529011e-16	2	Lsp1
Ifi202b	8.20311041148518e-20	0.273196326365837	0.292	0.08	1.1361307919907e-15	2	Ifi202b
Btg2	1.9766311989824e-19	-0.862473018994089	0.169	0.499	2.73763421059062e-15	2	Btg2
Gm5077	4.68544696286037e-19	0.281450284297655	0.449	0.174	6.48934404356161e-15	2	Gm5077
Aspn.2	6.01911067718339e-19	0.335847788100543	0.466	0.173	8.336468287899e-15	2	Aspn
S100a6	7.52488980713827e-19	0.462146955951548	0.944	0.774	1.04219723828865e-14	2	S100a6
Gstm1	1.41162963545623e-18	0.34561294956089	0.663	0.337	1.95510704510687e-14	2	Gstm1
Actb.1	1.07665641589903e-17	-0.554723264943321	0.972	0.97	1.49116913602016e-13	2	Actb
Fgfr1	4.12579856799839e-17	0.257639016252022	0.444	0.177	5.71423101667777e-13	2	Fgfr1
Dcn.2	6.88876764029304e-17	0.270334614612512	1	0.839	9.54094318180586e-13	2	Dcn
Antxr1	1.04074948727182e-16	0.253760793931608	0.331	0.113	1.44143803987147e-12	2	Antxr1
Fos.2	1.64317162635224e-16	-0.992075256058493	0.781	0.847	2.27579270249786e-12	2	Fos
Mgp.1	3.41540166329735e-16	1.08816723416425	0.522	0.261	4.73033130366683e-12	2	Mgp
Lbp.1	5.12706569490089e-16	0.380036384773503	0.376	0.146	7.10098598743773e-12	2	Lbp
Ly6c1.2	6.37287485687965e-16	0.287998660574848	0.685	0.343	8.82643167677831e-12	2	Ly6c1
Gnas.2	8.27630425798303e-16	0.56910817249304	0.944	0.873	1.14626813973065e-11	2	Gnas
Tppp3.1	1.24479252004869e-15	0.368781804556594	0.528	0.255	1.72403764026744e-11	2	Tppp3
Srpx.1	2.85258287269008e-15	0.251147955831712	0.416	0.169	3.95082727867577e-11	2	Srpx
Zfp36.1	4.93616180842337e-15	-0.796977398270575	0.551	0.722	6.83658410466637e-11	2	Zfp36
Ifi27l2a	9.62417834576794e-15	0.313153073457393	0.236	0.068	1.33294870088886e-10	2	Ifi27l2a
Abca8a.2	1.28610665912578e-14	0.321835450670602	0.669	0.351	1.78125772288921e-10	2	Abca8a
Ndrg1.1	2.14667638172594e-14	-0.51085544538302	0.124	0.404	2.97314678869042e-10	2	Ndrg1
Lrp6	2.51088864017391e-14	0.260409488204377	0.376	0.152	3.47758076664087e-10	2	Lrp6
Tmsb10.1	2.72250034754938e-14	0.332314118367988	0.798	0.516	3.7706629813559e-10	2	Tmsb10
Emp1	3.30077522842538e-14	0.320776892218726	0.483	0.23	4.57157369136914e-10	2	Emp1
Cpe.1	3.65652407843213e-14	-0.51844290237105	0.14	0.412	5.0642858486285e-10	2	Cpe
Mfap2	5.93382257936876e-14	0.272392438428366	0.343	0.135	8.21834427242573e-10	2	Mfap2
Adamts5	6.03539750860315e-14	0.3548294543855	0.404	0.177	8.35902554941536e-10	2	Adamts5
Thbs2	7.89892766314849e-14	0.289252015068619	0.275	0.092	1.09400148134607e-09	2	Thbs2
Klf6.1	1.00940607079616e-13	-0.683660592007355	0.309	0.575	1.39802740805268e-09	2	Klf6
Ppap2b.1	1.96613873323001e-13	0.346618860085323	0.826	0.602	2.72310214552356e-09	2	Ppap2b
Junb.2	2.55314936372395e-13	-0.643428807306113	0.646	0.794	3.53611186875767e-09	2	Junb
Jun.2	3.10803497118079e-13	-0.68949229800674	0.725	0.842	4.3046284350854e-09	2	Jun
Csrp1.1	3.79518783206907e-13	-0.384902404310127	0.073	0.331	5.25633514741566e-09	2	Csrp1
Entpd2.2	4.09598694480948e-13	0.267749612467562	0.601	0.305	5.67294191856113e-09	2	Entpd2
Ppic	6.19629514590323e-13	0.304531989011371	0.483	0.247	8.58186877707598e-09	2	Ppic
Tm4sf1.2	6.60759423931545e-13	-0.573699347584253	0.124	0.382	9.1515180214519e-09	2	Tm4sf1
Rplp1.2	7.99906456643528e-13	0.261975289719967	0.972	0.907	1.10787044245129e-08	2	Rplp1
Vwa1.2	1.06497326088078e-12	-0.417901673149173	0.124	0.385	1.47498796631988e-08	2	Vwa1
Gpx8	1.48290754936794e-12	0.256188870451314	0.427	0.201	2.05382695587459e-08	2	Gpx8
Mbnl1	1.73686952273119e-12	0.265826285494281	0.489	0.249	2.4055642889827e-08	2	Mbnl1
Rarres2.1	2.0269608222758e-12	0.345900889671337	0.775	0.509	2.80734073885199e-08	2	Rarres2
Zbtb20	2.38707928374788e-12	0.376961134888591	0.719	0.462	3.30610480799082e-08	2	Zbtb20
Cd34.2	2.66854619998013e-12	0.255070434326543	0.629	0.343	3.69593648697248e-08	2	Cd34
Npc2	3.12335550878181e-12	0.279260844070508	0.607	0.348	4.32584737966281e-08	2	Npc2
Tshz2.1	3.44525035815861e-12	0.283759490729017	0.506	0.259	4.77167174604967e-08	2	Tshz2
Fth1.2	4.04448517537184e-12	0.258027139117154	1	0.975	5.60161196788999e-08	2	Fth1
Igfbp3	5.20252240774596e-12	0.314339244498871	0.191	0.056	7.20549353472815e-08	2	Igfbp3
Cd59a.2	6.40128501795307e-12	-0.522030661557753	0.073	0.311	8.865779749865e-08	2	Cd59a
Itih5.1	8.78513702646853e-12	0.277805319776371	0.455	0.222	1.21674147816589e-07	2	Itih5
Sat1.1	8.95080310643344e-12	-0.688960840235264	0.287	0.527	1.23968623024103e-07	2	Sat1
Serpinh1.2	1.05345188554866e-11	0.316300955883296	0.809	0.561	1.4590308614849e-07	2	Serpinh1
Peg3	1.19362088788525e-11	0.272173308373802	0.23	0.08	1.65316492972107e-07	2	Peg3
Fbln2.1	1.31699240625467e-11	0.448528282744689	0.596	0.354	1.82403448266272e-07	2	Fbln2
Mal.2	1.39942859043983e-11	-0.510176949258344	0.011	0.226	1.93820859775916e-07	2	Mal
Matn2.2	2.53289378361659e-11	-0.460852054313109	0.09	0.323	3.50805789030898e-07	2	Matn2
Tinagl1.2	3.28588241599788e-11	-0.411655097629099	0.022	0.236	4.55094714615706e-07	2	Tinagl1
Col4a1	4.2820960535836e-11	0.42929786365504	0.573	0.346	5.93070303421329e-07	2	Col4a1
Esam.2	4.42038294688378e-11	-0.408436731721872	0.028	0.242	6.12223038143403e-07	2	Esam
Ace.1	6.2775846061642e-11	0.250412245865894	0.388	0.187	8.69445467953741e-07	2	Ace
Aplp2	9.11275524773874e-11	-0.434295482924849	0.27	0.483	1.26211660181182e-06	2	Aplp2
Gpr116.2	1.01547059297709e-10	-0.465404007134176	0.034	0.243	1.40642677127327e-06	2	Gpr116
Cav1.2	1.28728319117052e-10	-0.473433510885242	0.197	0.429	1.78288721977117e-06	2	Cav1
Fosb.2	1.43041313277319e-10	-0.808441131040662	0.393	0.581	1.98112218889087e-06	2	Fosb
Sdpr.2	1.74844453025538e-10	-0.686146051708479	0.101	0.311	2.4215956744037e-06	2	Sdpr
Ubc.1	3.10263977736333e-10	-0.524197711660134	0.601	0.735	4.29715609164821e-06	2	Ubc
Timp3.2	3.38020849131203e-10	-0.436957055874808	0.489	0.647	4.68158876046716e-06	2	Timp3
Tspan13.2	3.61064233119387e-10	-0.378299935034147	0.011	0.205	5.00073962870351e-06	2	Tspan13
S100a11	4.29825485161718e-10	0.259904842233291	0.674	0.426	5.95308296948979e-06	2	S100a11
Tagln.2	7.73037287300319e-10	-0.803151545829871	0.017	0.204	1.07065664291094e-05	2	Tagln
Pecam1.2	8.44572119293709e-10	-0.425083032557838	0.028	0.221	1.16973238522179e-05	2	Pecam1
Srgn.2	1.81488237448323e-09	-0.370846844518947	0.051	0.248	2.51361208865927e-05	2	Srgn
Slc9a3r2.1	2.15434614915222e-09	-0.312138499946144	0.028	0.215	2.98376941657583e-05	2	Slc9a3r2
Tpm1.2	2.43067736227814e-09	-0.788658289856611	0.208	0.406	3.36648814675522e-05	2	Tpm1
Dusp6.1	3.16545166023117e-09	-0.399817997715877	0.034	0.22	4.38415054942017e-05	2	Dusp6
Crip2.1	3.5655870271065e-09	-0.322529186107842	0.152	0.363	4.93833803254251e-05	2	Crip2
Procr.2	3.95889371788966e-09	0.250025106767826	0.376	0.187	5.48306779927718e-05	2	Procr
Mgll.1	4.03362985920909e-09	-0.383463976344037	0.079	0.272	5.58657735500459e-05	2	Mgll
Apod.2	4.40355860269749e-09	-0.835048508292936	0.949	0.811	6.09892866473602e-05	2	Apod
Cst3.2	4.82393090650393e-09	0.522744286921315	0.966	0.859	6.68114430550794e-05	2	Cst3
Egfl7.2	7.73978856104163e-09	-0.535684708805556	0.084	0.271	0.000107196071570427	2	Egfl7
Nid1.2	8.66519840154354e-09	0.265724459587533	0.607	0.374	0.000120012997861378	2	Nid1
Pcp4l1.2	8.94025501239540e-09	-0.353288661341524	0.006	0.169	0.000123822531921676	2	Pcp4l1
Ptprb.2	9.20831906383233e-09	-0.400453029814227	0.034	0.209	0.000127535219034078	2	Ptprb
Plp1.2	1.0250518476002e-08	-1.23012925284736	0.062	0.239	0.000141969680892627	2	Plp1
Itga6.2	1.12920458942042e-08	-0.285311752428492	0.022	0.193	0.000156394835634728	2	Itga6
Lum.2	2.56791970339604e-08	-0.344590798503435	0.809	0.494	0.000355656878920351	2	Lum
Rrbp1	2.82669076289887e-08	0.261428361857631	0.674	0.47	0.000391496670661494	2	Rrbp1
Atf3.1	2.83017963934418e-08	-0.605510331187984	0.157	0.351	0.00039197988004917	2	Atf3
Ier2.2	2.86385542803748e-08	-0.621030043250899	0.511	0.632	0.00039664397678319	2	Ier2
Sorbs2.1	2.89156517847206e-08	-0.284107157249879	0.017	0.177	0.00040048177721838	2	Sorbs2
Nfkbiz	2.99974447608846e-08	-0.405491653072491	0.09	0.271	0.000415464609938251	2	Nfkbiz
Gatm.2	3.12130317236145e-08	-0.37568205436228	0.006	0.159	0.000432300489372061	2	Gatm
Hspa1a.2	3.47546665051607e-08	-0.658786457348218	0.23	0.423	0.000481352131096475	2	Hspa1a
Kcna1.2	4.17013860636819e-08	-0.408922937183897	0.006	0.156	0.000577564196981994	2	Kcna1
Col4a2.1	4.42488518756164e-08	0.295048134706952	0.449	0.271	0.000612846598477287	2	Col4a2
Mylk.1	4.72930223067503e-08	-0.406255167762849	0.045	0.216	0.000655008358948491	2	Mylk
Cox6c.2	4.84225071322524e-08	-0.327315520031654	0.517	0.644	0.000670651723781696	2	Cox6c
Rasgrp2.2	4.96753994032104e-08	-0.287197682485328	0.039	0.204	0.000688004281734464	2	Rasgrp2
Emcn.2	6.65810054952034e-08	-0.26466132565606	0.022	0.18	0.000922146926108567	2	Emcn
Ehd4.2	7.70108229876148e-08	-0.409354612570715	0.056	0.221	0.00106659989837847	2	Ehd4
Egr1.2	8.16656910278609e-08	-0.545345145458587	0.753	0.791	0.00113106982073587	2	Egr1
Myh9.1	8.31396541940096e-08	-0.293463890640426	0.084	0.259	0.00115148421058703	2	Myh9
Flt1.2	9.21720918894151e-08	-0.44276725123336	0.051	0.212	0.0012765834726684	2	Flt1
Cnp.2	9.49877039603434e-08	-0.426200475963868	0.034	0.19	0.00131557969985076	2	Cnp
Sncg.2	1.16396491502756e-07	-0.28112063145703	0.022	0.174	0.00161209140731318	2	Sncg
Hsp90ab1	2.77395120219346e-07	-0.28734569183853	0.843	0.919	0.00384192241503795	2	Hsp90ab1
Cldn5.2	3.46320305827004e-07	-0.589049929345002	0.011	0.147	0.004796536235704	2	Cldn5
Ier3.2	3.6448518253004e-07	-0.492948171885159	0.101	0.271	0.00504811977804106	2	Ier3
Cadm4.2	3.83504336684747e-07	-0.323997911282733	0.011	0.147	0.00531153506308375	2	Cadm4
mt-Rnr1.1	3.97007650155893e-07	0.394409366094498	0.68	0.546	0.00549855595465911	2	mt-Rnr1
Ctnna1.2	4.05544715315435e-07	-0.291097486468793	0.14	0.308	0.00561679430711878	2	Ctnna1
Epas1.2	4.45911555343843e-07	-0.25065311162814	0.045	0.196	0.00617587504151223	2	Epas1
Tcf4.2	4.693567500914e-07	-0.372986345037918	0.264	0.432	0.00650059098876589	2	Tcf4
Socs3.2	5.31691952361027e-07	-0.485640197017415	0.208	0.368	0.00736393354020022	2	Socs3
Mbp.2	5.86141982490255e-07	-0.936160740187533	0.073	0.222	0.00811806645749003	2	Mbp
C130074G19Rik.2	5.95356505681086e-07	-0.295159838884177	0.045	0.192	0.00824568760368304	2	C130074G19Rik
Calm1.2	7.3532043312436e-07	-0.477987166296002	0.713	0.734	0.0101841879987724	2	Calm1
Ddx5	7.49015912751176e-07	-0.25830287306313	0.629	0.747	0.0103738703916038	2	Ddx5
Atp1a2.1	7.82981856638263e-07	-0.424647061288705	0.101	0.254	0.0108442987144399	2	Atp1a2
Cd200.1	8.82697368970819e-07	-0.333662982520629	0.124	0.28	0.0122253585602458	2	Cd200
Abcg2.2	1.00792079711044e-06	-0.316865913593129	0.056	0.201	0.0139597030399796	2	Abcg2
Klf2	1.25546058609504e-06	-0.48757929620158	0.32	0.456	0.0173881291174163	2	Klf2
Postn	1.33384287414589e-06	0.260099741602778	0.303	0.163	0.0184737238069206	2	Postn
H3f3b.1	1.35667545451838e-06	-0.347861681147696	0.365	0.51	0.0187899550450795	2	H3f3b
Cd36.2	1.36832025822906e-06	-0.631925754023846	0.045	0.183	0.0189512355764725	2	Cd36
Art3.2	1.45176685430245e-06	-0.280952171439494	0.039	0.178	0.0201069709320889	2	Art3
Ptn.2	1.48442915797408e-06	-0.481808681793385	0.067	0.214	0.0205593438379411	2	Ptn
mt-Cytb	2.66912834079565e-06	-0.267336029650986	0.871	0.916	0.0369674275200197	2	mt-Cytb
Adamts1.1	3.46203878637747e-06	-0.529641795771038	0.174	0.325	0.0479492371913279	2	Adamts1
Thbs4.2	3.55995004025329e-06	-0.250020800510013	0.062	0.203	0.0493053080575081	2	Thbs4
Gng11.1	3.80263406947308e-06	-0.303906098854466	0.185	0.345	0.0526664818622022	2	Gng11
Hspb1.2	3.99719553652853e-06	-0.580647527252222	0.191	0.33	0.0553611581809201	2	Hspb1
Dbi.2	5.74165240729217e-06	-0.709845115685922	0.393	0.509	0.0795218858409966	2	Dbi
Sostdc1.2	6.27342791683089e-06	-0.344954664442241	0.017	0.131	0.0868869766481079	2	Sostdc1
Jund	9.39375709383415e-06	-0.280280295273125	0.562	0.669	0.130103535749603	2	Jund
8430408G22Rik.2	1.14259749705332e-05	-0.327723230962842	0.034	0.151	0.158249753341885	2	8430408G22Rik
Scd2.1	1.64134730970756e-05	-0.391800366291535	0.275	0.406	0.227326602394497	2	Scd2
Actn4.2	1.96280219226987e-05	-0.295128833535752	0.202	0.336	0.271848103629377	2	Actn4
Tsc22d1.2	2.13270877492075e-05	-0.349552095347963	0.208	0.338	0.295380165326524	2	Tsc22d1
Ppp1r15a.2	2.47500230286293e-05	-0.403512935697073	0.219	0.361	0.342787818946515	2	Ppp1r15a
Abcb1a.2	2.97944868849194e-05	-0.388707716624037	0.056	0.172	0.412653643356133	2	Abcb1a
Acta2.2	5.33044103163999e-05	-1.03410843091713	0.09	0.204	0.738266082882139	2	Acta2
Sfrp5.1	6.17606611091525e-05	-0.578861416733599	0.022	0.121	0.855385156361762	2	Sfrp5
Nr2f2.1	6.21761008638649e-05	-0.280990670454565	0.185	0.314	0.861138996964529	2	Nr2f2
Nfkbia.1	7.46094099464505e-05	-0.384000121473492	0.281	0.406	1	2	Nfkbia
Scarb1.1	8.18543712557847e-05	-0.269606012631395	0.079	0.191	1	2	Scarb1
Fabp4.2	8.7428788008788e-05	-1.47327573297965	0.287	0.394	1	2	Fabp4
Mpz.2	0.000115295398885231	-1.64642218702951	0.107	0.217	1	2	Mpz
Myoc.2	0.000123170282820618	0.371064445129988	0.242	0.14	1	2	Myoc
Abca6.2	0.00018025392917286	-0.270055862124274	0.084	0.189	1	2	Abca6
Myh11.2	0.000234553323437999	-0.552394142253246	0.022	0.108	1	2	Myh11
Angptl7.2	0.000242102470975545	-0.874178648973771	0.124	0.227	1	2	Angptl7
Gpm6b.2	0.000268997505972962	-0.399282810945963	0.112	0.216	1	2	Gpm6b
Bsg.2	0.00049729571594306	-0.443697761800756	0.528	0.581	1	2	Bsg
Cp.2	0.000532122641181251	-0.767667156881049	0.287	0.356	1	2	Cp
Tpm2.2	0.000764427502744032	-0.618572368611324	0.062	0.149	1	2	Tpm2
Enpp2.2	0.000913579198310895	-0.30398439525021	0.135	0.23	1	2	Enpp2
Rgs5.2	0.00186311905715209	-0.604373843669441	0.045	0.118	1	2	Rgs5
Edn1.2	0.0022375875696869	-0.384718254358932	0.067	0.145	1	2	Edn1
Cryab.2	0.00285891741597435	-0.420955110636063	0.197	0.27	1	2	Cryab
Aqp1.2	0.00320837110981735	-0.487261029591438	0.073	0.147	1	2	Aqp1
Dnajb1.2	0.00398773551741822	-0.408065092439969	0.247	0.327	1	2	Dnajb1
Id3	0.0041904703819402	-0.262162430636777	0.303	0.402	1	2	Id3
Nr4a1.1	0.00556474684476786	-0.290216351088074	0.331	0.407	1	2	Nr4a1
Plvap.2	0.00961097430398335	-0.458436446938323	0.079	0.141	1	2	Plvap
Slco1a4	1.51661378464986e-276	1.33834871559044	0.8	0.015	2.10051009174006e-272	3	Slco1a4
Slc39a8	1.02494731206709e-249	1.10747774140886	0.744	0.015	1.41955202721292e-245	3	Slc39a8
Cldn5.3	2.33635065150411e-245	1.96985681177961	0.963	0.06	3.23584565233319e-241	3	Cldn5
Prom1	1.12479593264565e-221	0.906971123126607	0.725	0.021	1.55784236671422e-217	3	Prom1
Abcb1a.3	9.09951785519992e-200	1.61947103220237	0.944	0.091	1.26028322294519e-195	3	Abcb1a
Spock2.1	3.9508089301001e-186	1.30567395076123	0.775	0.051	5.47187036818863e-182	3	Spock2
Mfsd2a	3.33124383178182e-176	0.742886111403963	0.556	0.013	4.61377270701782e-172	3	Mfsd2a
Maoa	1.7344297692625e-170	0.73423392570619	0.662	0.032	2.40218523042856e-166	3	Maoa
Ptn.3	3.29520174037216e-148	1.62090801017788	0.912	0.136	4.56385441041544e-144	3	Ptn
Edn1.3	3.30099235248837e-143	1.58446952475022	0.769	0.081	4.57187440819639e-139	3	Edn1
Slc2a1.2	5.91784168151307e-142	0.970563630684749	0.744	0.069	8.1962107288956e-138	3	Slc2a1
Slc39a10	5.31987152405389e-135	0.815327373947615	0.637	0.047	7.36802206081464e-131	3	Slc39a10
C130074G19Rik.3	1.48422420646814e-133	1.0881539903415	0.844	0.119	2.05565052595838e-129	3	C130074G19Rik
Sox17	8.3912978391702e-129	0.769262640523647	0.669	0.057	1.16219475072507e-124	3	Sox17
Tspan13.3	5.03771606907523e-128	1.09003516726496	0.856	0.127	6.9772367556692e-124	3	Tspan13
Lpar6	6.77523697302161e-128	0.824709283689172	0.65	0.055	9.38370320763493e-124	3	Lpar6
Slc7a5	2.57045662749025e-127	0.531248628859482	0.438	0.014	3.56008242907399e-123	3	Slc7a5
Lcn2	5.42938965056956e-126	0.453282982458657	0.425	0.012	7.51970466603883e-122	3	Lcn2
Lef1	1.63474766477076e-125	0.364994175553951	0.338	0.002	2.2641255157075e-121	3	Lef1
Abcg2.3	2.36590043805501e-125	1.08911854647586	0.844	0.128	3.27677210670619e-121	3	Abcg2
Pcp4l1.3	2.16882966533688e-124	0.949107104192043	0.794	0.096	3.00382908649158e-120	3	Pcp4l1
Bmx	3.64934755953277e-124	0.693420218104304	0.475	0.02	5.05434636995288e-120	3	Bmx
Degs2	1.3689535579185e-123	0.357290655805039	0.356	0.005	1.89600067771712e-119	3	Degs2
Flt1.3	2.10455940389373e-118	1.22020324092071	0.85	0.139	2.91481477439281e-114	3	Flt1
Gpr116.3	1.04033403893079e-115	1.05265347828457	0.906	0.162	1.44086264391915e-111	3	Gpr116
Eogt	1.51351773140063e-110	0.559491960426984	0.506	0.033	2.09622205798987e-106	3	Eogt
Pglyrp1	1.0651221892147e-108	0.354495015180772	0.344	0.007	1.47519423206236e-104	3	Pglyrp1
Slc7a1	2.56045296333028e-107	0.453282982458657	0.406	0.016	3.54622735421244e-103	3	Slc7a1
Car4	2.31788217630385e-103	0.980910418548884	0.45	0.027	3.21026681418084e-99	3	Car4
Slc16a4	6.8639862382127e-101	0.313959341530695	0.294	0.004	9.50662093992458e-97	3	Slc16a4
Pltp.1	1.34675476712018e-97	1.01897710664037	0.887	0.209	1.86525535246144e-93	3	Pltp
Sema7a	3.67160344772631e-97	0.488419503540771	0.488	0.036	5.08517077510095e-93	3	Sema7a
Egfl7.3	9.86292996517726e-96	1.01539771463215	0.906	0.195	1.36601580017705e-91	3	Egfl7
Robo4	1.53490133985133e-95	0.533552684593362	0.531	0.048	2.12583835569409e-91	3	Robo4
Pdgfb	1.09349835680716e-94	0.427171051811733	0.438	0.028	1.51449522417791e-90	3	Pdgfb
Esam.3	1.08534013728598e-91	0.908512129161691	0.825	0.168	1.50319609014108e-87	3	Esam
Bsg.3	2.3507899885003e-90	1.57813899821155	0.975	0.54	3.25584413407291e-86	3	Bsg
Net1	5.54010375512412e-88	0.685116059476528	0.55	0.064	7.6730437008469e-84	3	Net1
Marc2	3.61766029257848e-84	0.866656037113326	0.744	0.155	5.01045950522119e-80	3	Marc2
Gimap5	1.71145543979379e-82	0.453430359877756	0.431	0.035	2.3703657841144e-78	3	Gimap5
Id1	2.36619214915635e-82	0.768401235231303	0.575	0.077	3.27717612658155e-78	3	Id1
Sgms1	1.65983498038424e-80	0.573057308655923	0.531	0.065	2.29887144783217e-76	3	Sgms1
Sorbs2.2	3.90541375321625e-80	0.695477027867064	0.681	0.115	5.4089980482045e-76	3	Sorbs2
Ly6e.2	1.10652492346842e-77	0.986368609518544	0.944	0.304	1.53253701900376e-73	3	Ly6e
Hhex	1.64551046261941e-77	0.485674663200124	0.394	0.03	2.27903199072788e-73	3	Hhex
Slc9a3r2.2	3.10088190180891e-77	0.707063205731036	0.744	0.149	4.29472143400533e-73	3	Slc9a3r2
Ly6c1.3	3.18730010936874e-77	1.09283214270998	0.963	0.322	4.4144106514757e-73	3	Ly6c1
Scarb1.2	8.56412645620754e-77	0.836710630569032	0.694	0.134	1.18613151418474e-72	3	Scarb1
Lsr	3.22548581343604e-76	0.292570437130447	0.3	0.013	4.46729785160892e-72	3	Lsr
S1pr1.1	5.34638143531613e-76	0.634902555773958	0.6	0.09	7.40473828791284e-72	3	S1pr1
Gpcpd1	2.06899172496407e-75	0.579868967165334	0.481	0.055	2.86555353907523e-71	3	Gpcpd1
Gbp4	1.09322863790876e-73	0.574986891707635	0.556	0.077	1.51412166350363e-69	3	Gbp4
Fam13c	2.51444288249696e-73	0.507722073235628	0.469	0.052	3.48250339225828e-69	3	Fam13c
Cxcl12.1	3.95985272416088e-73	1.21917585535705	0.925	0.351	5.48439602296282e-69	3	Cxcl12
9430020K01Rik	5.67488578549428e-73	0.473188345313255	0.462	0.051	7.85971681290958e-69	3	9430020K01Rik
Fryl	6.37766389112362e-73	0.464677950541476	0.5	0.061	8.83306448920621e-69	3	Fryl
Emcn.3	2.35050692063723e-72	0.651487265766448	0.669	0.12	3.25545208508256e-68	3	Emcn
Pecam1.3	4.01228963584808e-72	0.669709699457268	0.769	0.152	5.55702114564958e-68	3	Pecam1
Ptprb.3	1.8852815794593e-71	0.707463384338255	0.731	0.145	2.61111498755114e-67	3	Ptprb
Hoxd3	4.00305103822697e-71	0.390967396646258	0.406	0.037	5.54422568794435e-67	3	Hoxd3
Ch25h	1.80891697031362e-70	0.480783269729072	0.275	0.012	2.50535000388436e-66	3	Ch25h
Mal.3	1.31899197303204e-68	0.791765553316513	0.744	0.158	1.82680388264938e-64	3	Mal
Fam101b.1	1.43948217032498e-68	0.586920284349363	0.575	0.089	1.9936828059001e-64	3	Fam101b
Erg	6.12798631136144e-68	0.517823124034997	0.5	0.067	8.48726104123559e-64	3	Erg
Gimap6	4.36109356710882e-67	0.593784044039566	0.619	0.114	6.04011459044572e-63	3	Gimap6
Mmrn2.1	4.46251924047272e-67	0.613271762907949	0.606	0.105	6.18058914805472e-63	3	Mmrn2
Plk2	7.13617435844172e-67	0.671853976958599	0.575	0.097	9.88360148644177e-63	3	Plk2
St3gal6	2.71489681342126e-64	0.481654246465711	0.481	0.066	3.76013208658845e-60	3	St3gal6
Afap1l1	1.31505720643186e-63	0.343589704390077	0.369	0.034	1.82135423090813e-59	3	Afap1l1
Dll4	8.13430217958576e-63	0.262449258730429	0.281	0.016	1.12660085187263e-58	3	Dll4
Kank3	3.50863601655651e-62	0.419441061964138	0.406	0.046	4.85946088293076e-58	3	Kank3
Grap	4.10699835411587e-62	0.306068285918387	0.331	0.026	5.68819272045049e-58	3	Grap
Sdpr.3	6.44029035176895e-62	0.779646964142689	0.863	0.24	8.91980213719999e-58	3	Sdpr
Tm4sf1.3	7.17596388372417e-62	0.910302690029532	0.869	0.312	9.93870997895798e-58	3	Tm4sf1
Hspb1.3	9.7020030730999e-62	1.02833324337041	0.85	0.27	1.34372742562434e-57	3	Hspb1
Rsad2	3.24891450501619e-61	0.331365640404396	0.269	0.015	4.49974658944742e-57	3	Rsad2
Eltd1	3.36112135764901e-61	0.512451520214626	0.531	0.085	4.65515308034387e-57	3	Eltd1
Gimap1	9.51378101170266e-61	0.355076893542552	0.369	0.037	1.31765867012082e-56	3	Gimap1
Vwf	3.37255355701279e-60	0.475275317754939	0.494	0.073	4.67098667646271e-56	3	Vwf
8430408G22Rik.3	1.46189501920126e-56	0.784143968072021	0.55	0.103	2.02472460159375e-52	3	8430408G22Rik
Cdh5.2	4.04507041946993e-56	0.534227599545009	0.631	0.136	5.60242253096586e-52	3	Cdh5
Podxl	2.19416705741559e-55	0.431272358920024	0.481	0.075	3.0389213745206e-51	3	Podxl
AU021092	3.7953745257907e-55	0.314316562356499	0.312	0.028	5.25659371822011e-51	3	AU021092
Cyb5b	5.66000609403575e-55	0.420278648344833	0.425	0.06	7.83910844023951e-51	3	Cyb5b
Tsc22d1.3	6.15961735032232e-55	0.725942745278968	0.831	0.28	8.53107003019642e-51	3	Tsc22d1
Eng	1.27605460848117e-52	0.494557651301619	0.594	0.128	1.76733563274642e-48	3	Eng
Cd93	1.51190274628406e-52	0.53587117516778	0.519	0.099	2.09398530360342e-48	3	Cd93
Pkig	2.92190842780705e-52	0.462030975281571	0.512	0.095	4.04684317251276e-48	3	Pkig
Gm525	6.53848014183803e-52	0.324729639755727	0.238	0.015	9.05579499644567e-48	3	Gm525
Calm1.3	1.92625639161361e-51	0.836636856272329	0.981	0.71	2.66786510238485e-47	3	Calm1
Tjp1	9.75233851655025e-51	0.460063613873343	0.562	0.12	1.35069888454221e-46	3	Tjp1
Clu.1	1.03918193338182e-50	0.573742076125642	0.631	0.152	1.43926697773381e-46	3	Clu
Acvrl1	6.16958245185496e-49	0.435392528649638	0.488	0.094	8.54487169581912e-45	3	Acvrl1
Rasgrp3	1.12885816449965e-48	0.303998795017077	0.306	0.032	1.56346855783201e-44	3	Rasgrp3
Slc3a2	3.57710751653781e-48	0.675376327291701	0.675	0.209	4.95429391040487e-44	3	Slc3a2
Rps21.2	8.09965297845345e-48	0.70575845459368	1	0.789	1.1218019375158e-43	3	Rps21
Ctla2a.2	3.51974523276334e-47	0.592585807172993	0.519	0.107	4.87484714737723e-43	3	Ctla2a
Epas1.3	5.21963543998878e-47	0.603286185180493	0.588	0.145	7.22919508438447e-43	3	Epas1
Col1a2.3	5.850812519205e-47	-1.81065512655605	0.338	0.828	8.10337533909892e-43	3	Col1a2
Cobll1	1.26429821908368e-46	0.333396967033739	0.325	0.039	1.7510530334309e-42	3	Cobll1
Cav2	3.51515003683255e-46	0.454455988164933	0.581	0.138	4.86848280101308e-42	3	Cav2
Ecscr	9.74718938118289e-46	0.473207394202229	0.55	0.123	1.34998572929383e-41	3	Ecscr
Ctgf	1.51444661188096e-45	0.524841147888871	0.431	0.075	2.09750855745513e-41	3	Ctgf
Actn4.3	3.34037279339206e-45	0.684851181479637	0.769	0.284	4.626416318848e-41	3	Actn4
Mast4	4.8592762600031e-45	0.300342744392402	0.325	0.041	6.7300976201043e-41	3	Mast4
Clec2d	6.04939418748111e-45	0.445775002792945	0.537	0.124	8.37841094966134e-41	3	Clec2d
Tmsb4x.2	1.78155830684482e-44	0.799889972945527	1	0.835	2.46745825498008e-40	3	Tmsb4x
Fxyd5.1	1.91639559724775e-43	0.550915778680558	0.594	0.158	2.65420790218813e-39	3	Fxyd5
Uaca	2.19419036537201e-43	0.64056771236165	0.637	0.188	3.03895365604023e-39	3	Uaca
Tjp2	3.07658424172041e-43	0.336323338467275	0.394	0.065	4.26106917478276e-39	3	Tjp2
Hmbox1	3.87590394519338e-43	0.283100547700491	0.331	0.045	5.36812696409283e-39	3	Hmbox1
Serinc3	4.34234612138267e-43	0.632564240420549	0.769	0.315	6.014149378115e-39	3	Serinc3
Cav1.3	8.7747615453862e-43	0.685534922780552	0.869	0.366	1.21530447403599e-38	3	Cav1
Sparcl1	1.27569942949037e-41	0.688466823267961	0.994	0.807	1.76684370984417e-37	3	Sparcl1
Ushbp1	2.11587224080606e-41	0.405660975310828	0.462	0.094	2.93048305351639e-37	3	Ushbp1
Galnt15	2.22093849079164e-41	0.333799495095267	0.362	0.058	3.07599980974642e-37	3	Galnt15
Cd200.2	1.27938220676518e-40	0.612851915744013	0.694	0.227	1.77194435636977e-36	3	Cd200
Fnbp1l	2.16679034628792e-40	0.417706882499438	0.394	0.07	3.00100462960877e-36	3	Fnbp1l
Sema3g	2.23684634365442e-40	0.328567962694239	0.281	0.033	3.09803218596137e-36	3	Sema3g
Gsn.2	7.55352363805818e-40	-2.07264311424038	0.619	0.865	1.04616302387106e-35	3	Gsn
Palmd	1.27074935773057e-39	0.392284541407954	0.456	0.096	1.75998786045683e-35	3	Palmd
Tinagl1.3	2.48021233026755e-39	0.48954694726462	0.637	0.178	3.43509407742056e-35	3	Tinagl1
Lgals1.1	3.84107411149072e-39	-0.946107967978459	0.069	0.65	5.31988764441465e-35	3	Lgals1
Icam2	4.56723050268819e-39	0.29914384186074	0.394	0.07	6.32561424622315e-35	3	Icam2
Atp1b3	7.45961848194892e-39	0.509117158801067	0.669	0.224	1.03315715974993e-34	3	Atp1b3
Mecom	1.69547565805376e-38	0.257032038125014	0.25	0.027	2.34823378640446e-34	3	Mecom
Rpl13a.2	2.52545067884555e-38	0.585990223617334	0.981	0.807	3.49774919020109e-34	3	Rpl13a
Col3a1.3	3.9249979503212e-38	-1.75943428890677	0.4	0.803	5.43612216119486e-34	3	Col3a1
Fli1	6.01132528682628e-38	0.403550846277328	0.4	0.077	8.3256855222544e-34	3	Fli1
Entpd1	7.59118616765319e-38	0.367411538800878	0.45	0.098	1.05137928421997e-33	3	Entpd1
Gbp3	1.07160978853703e-37	0.268210680269871	0.3	0.042	1.48417955712379e-33	3	Gbp3
Epha4	1.63585173761657e-37	0.264159334769376	0.256	0.03	2.26565465659895e-33	3	Epha4
Ifnar1	2.90730809540958e-37	0.362329190457512	0.4	0.081	4.02662171214227e-33	3	Ifnar1
Clec14a	7.89121970814275e-37	0.341150480479634	0.388	0.073	1.09293392957777e-32	3	Clec14a
Serping1.2	1.5688015367174e-36	-1.1635931186651	0.156	0.677	2.1727901283536e-32	3	Serping1
Nfat5	2.3825632246128e-36	0.432164886343107	0.431	0.095	3.29985006608873e-32	3	Nfat5
Ier3.3	2.96770351626316e-36	0.600755374261205	0.656	0.22	4.11026937002447e-32	3	Ier3
Fmo2.1	6.23869060389193e-36	0.422301932049621	0.488	0.12	8.64058648639033e-32	3	Fmo2
Arl15	6.62784667400008e-36	0.271747766990838	0.269	0.035	9.17956764349011e-32	3	Arl15
Gja1.1	8.24127685384485e-36	0.465745283563158	0.494	0.128	1.14141684425751e-31	3	Gja1
Fas	1.36809476208858e-35	0.258975919630699	0.256	0.032	1.89481124549268e-31	3	Fas
Rpl37.2	1.96776217159064e-35	0.563075442202834	0.925	0.614	2.72535060765304e-31	3	Rpl37
Gbp9	1.47657978803328e-34	0.308979618075571	0.312	0.051	2.04506300642609e-30	3	Gbp9
Col1a1.3	2.59427631973486e-34	-1.54129151986083	0.269	0.725	3.59307270283278e-30	3	Col1a1
Cgnl1	7.96643211746987e-34	0.340968296215453	0.331	0.06	1.10335084826958e-29	3	Cgnl1
Gimap4	8.13481742203194e-34	0.316204011384519	0.369	0.073	1.12667221295142e-29	3	Gimap4
Rasip1	1.64417416629926e-33	0.296605125087218	0.381	0.076	2.27718122032447e-29	3	Rasip1
Tcf4.3	2.76663471281957e-33	0.592334374173465	0.819	0.38	3.83178907725511e-29	3	Tcf4
Dbp	3.63612055156079e-33	0.294748960663205	0.306	0.051	5.03602696391169e-29	3	Dbp
Sp100	6.64736416023084e-33	0.407925133949027	0.431	0.104	9.20659936191971e-29	3	Sp100
Srgn.3	7.3787270075487e-33	0.377940796535418	0.619	0.195	1.0219536905455e-28	3	Srgn
Cnot6l	2.78396717919888e-32	0.281179494964214	0.362	0.073	3.85579454319045e-28	3	Cnot6l
Igfbp7.2	8.0903073444744e-32	0.582045937925914	0.994	0.842	1.12050756720971e-27	3	Igfbp7
Tie1	1.0988416312291e-31	0.302397645507376	0.35	0.069	1.52189565925231e-27	3	Tie1
Rps14.2	1.12893206636641e-31	0.556652130806517	0.981	0.856	1.56357091191748e-27	3	Rps14
Cd63.1	2.44874277162319e-31	-0.764180011955143	0.05	0.561	3.39150873869812e-27	3	Cd63
Tpd52	2.87971356812402e-31	0.25221397063328	0.294	0.05	3.98840329185176e-27	3	Tpd52
S100a6.1	3.46787334922848e-31	-0.876595492343292	0.469	0.818	4.80300458868144e-27	3	S100a6
Hspa1b.2	4.31916753279453e-31	0.61081808637223	0.669	0.252	5.98204703292042e-27	3	Hspa1b
Tspan5	6.13751629357492e-31	0.298907908830308	0.369	0.079	8.50046006660127e-27	3	Tspan5
Tmem88	8.03460104542087e-31	0.310941080131331	0.381	0.083	1.11279224479079e-26	3	Tmem88
Rarres2.2	8.78815287553914e-31	-0.845981232921237	0.075	0.574	1.21715917326217e-26	3	Rarres2
Ogn.2	1.75659288746135e-30	-1.21676070237569	0.1	0.591	2.43288114913397e-26	3	Ogn
Nes	1.94950953145156e-30	0.296986587713302	0.319	0.059	2.70007070106041e-26	3	Nes
Sptbn1.2	7.65409527020599e-30	0.574521759836337	0.906	0.646	1.06009219492353e-25	3	Sptbn1
Insr	1.36346447041095e-29	0.252079804821211	0.281	0.048	1.88839829151916e-25	3	Insr
Filip1	1.8918991163235e-29	0.3649899355799	0.406	0.099	2.62028027610805e-25	3	Filip1
Id3.1	1.65099109421456e-28	0.557508305595858	0.775	0.358	2.28662266548717e-24	3	Id3
Bcam.1	1.81419111205487e-28	0.32704746628847	0.506	0.146	2.51265469019599e-24	3	Bcam
Dcn.3	2.18847596141176e-28	-2.36863144506411	0.719	0.866	3.03103920655528e-24	3	Dcn
Rps11.2	2.3111799508478e-28	0.55135074164355	0.906	0.557	3.2009842319242e-24	3	Rps11
H2-D1.1	2.43198170333658e-28	0.500025635142987	0.956	0.716	3.36829465912116e-24	3	H2-D1
Anp32a	4.70063346777135e-28	0.4966694655711	0.694	0.301	6.51037735286332e-24	3	Anp32a
Kitl.1	5.25980717030499e-28	0.435738862326353	0.569	0.203	7.28483293087241e-24	3	Kitl
Gbp7	6.6050830730451e-28	0.411240086900098	0.45	0.127	9.14804005616746e-24	3	Gbp7
Glul	7.40413101387647e-28	0.602079291584933	0.537	0.2	1.02547214542189e-23	3	Glul
Rps20.2	1.23972417037192e-27	0.536990791505177	0.956	0.679	1.71701797596511e-23	3	Rps20
Ncoa7	2.93729689580868e-27	0.38662468964625	0.388	0.1	4.06815620069502e-23	3	Ncoa7
Rps19.1	3.23064336111068e-27	0.572530463488317	0.875	0.594	4.4744410551383e-23	3	Rps19
Myh9.2	3.74453333795304e-27	0.431231428872394	0.588	0.212	5.18617867306496e-23	3	Myh9
Sh3bp5	3.82721012344939e-27	0.375044511407453	0.475	0.144	5.30068602097741e-23	3	Sh3bp5
Lrrfip1	3.95982141682375e-27	0.445605530698113	0.438	0.127	5.48435266230089e-23	3	Lrrfip1
Tshz2.2	4.37800871320848e-27	0.467674311908178	0.631	0.251	6.06354206779374e-23	3	Tshz2
Rpl37a.2	7.90859507155983e-27	0.492045196005536	0.912	0.641	1.09534041741104e-22	3	Rpl37a
Ece1	8.27181707804487e-27	0.437569973333692	0.644	0.261	1.14564666530921e-22	3	Ece1
Ctnnb1	1.43544190973268e-26	0.394343584764303	0.613	0.23	1.98808704497977e-22	3	Ctnnb1
Grb14	3.07136530737648e-26	0.269193463021258	0.312	0.066	4.25384095071643e-22	3	Grb14
Rps24.2	3.45972452904634e-26	0.48504509443392	0.969	0.76	4.79171847272918e-22	3	Rps24
Rplp2.2	6.73973056744008e-26	0.439221528000112	0.938	0.741	9.33452683590451e-22	3	Rplp2
Rps3.2	7.20528250909558e-26	0.469852651665619	0.938	0.702	9.97931627509738e-22	3	Rps3
Crip2.2	9.3823147070857e-26	0.427033161985486	0.706	0.311	1.29945058693137e-21	3	Crip2
Mt2.1	1.24857463903471e-25	0.401356859050571	0.631	0.245	1.72927587506307e-21	3	Mt2
Plxna2	1.62978978983231e-25	0.2850828507545	0.262	0.05	2.25725885891775e-21	3	Plxna2
Hspa1a.3	3.48131005767793e-25	0.615384545107796	0.756	0.373	4.82161442988393e-21	3	Hspa1a
C1s.3	8.00185405624169e-25	-0.676582548537541	0.044	0.478	1.10825678678947e-20	3	C1s
Fstl1.2	8.08759658442278e-25	-0.876203244867721	0.144	0.556	1.12013212694256e-20	3	Fstl1
Fxyd1.1	1.2983915167619e-24	-0.763846889691885	0.031	0.464	1.79827225071523e-20	3	Fxyd1
Cst3.3	3.73483162700298e-24	0.52428430772887	0.994	0.858	5.17274180339913e-20	3	Cst3
Myct1	4.60209347310313e-24	0.25579778517658	0.3	0.066	6.37389946024784e-20	3	Myct1
Gm9843.1	4.93536332132874e-24	0.444594594951715	0.819	0.48	6.83547820004031e-20	3	Gm9843
Bst2	5.89340084595827e-24	0.309512847532483	0.338	0.085	8.16236017165221e-20	3	Bst2
Macf1	9.10312301792848e-24	0.373618740358581	0.5	0.172	1.26078253798309e-19	3	Macf1
Ctsl.1	9.89261722456712e-24	-0.755786563751768	0.212	0.614	1.37012748560255e-19	3	Ctsl
Ablim1.1	1.3306343108571e-23	0.360819417757709	0.569	0.209	1.84292852053708e-19	3	Ablim1
Utrn.1	1.94108770572471e-23	0.391059286714116	0.594	0.224	2.68840647242872e-19	3	Utrn
Rpl32.2	2.33131348392049e-23	0.464273172981123	0.931	0.711	3.22886917522988e-19	3	Rpl32
Ctsb.2	2.93017797643085e-23	-0.688052218172075	0.181	0.574	4.05829649735673e-19	3	Ctsb
Nfib.3	3.79502200022454e-23	0.478602099377715	0.706	0.346	5.25610547031099e-19	3	Nfib
Gpc3.2	6.01900404580219e-23	-1.27263195313333	0.1	0.504	8.33632060343604e-19	3	Gpc3
Rps9.1	1.10624477881689e-22	0.439610504695133	0.956	0.796	1.53214901866139e-18	3	Rps9
Iigp1	1.44003102359736e-22	0.338178097885372	0.325	0.081	1.99444296768234e-18	3	Iigp1
Pim3	2.64254416197691e-22	0.294065085126175	0.419	0.128	3.65992366433802e-18	3	Pim3
Mmp2.2	2.72544957931684e-22	-0.834403572401971	0.05	0.457	3.77474766735382e-18	3	Mmp2
Rpl18.1	3.24540918358137e-22	0.433347891961175	0.725	0.384	4.49489171926019e-18	3	Rpl18
Cd2ap	3.30795421416831e-22	0.359038658202247	0.519	0.193	4.58151658662311e-18	3	Cd2ap
Serpinf1.3	4.02756077818261e-22	-0.95513583780749	0.062	0.466	5.57817167778292e-18	3	Serpinf1
Marcks.1	5.74715575548524e-22	-0.749766448547884	0.281	0.627	7.95981072134706e-18	3	Marcks
H2-K1.1	9.89620868436219e-22	0.510640673294112	0.794	0.48	1.37062490278416e-17	3	H2-K1
Rps5.2	1.34454553155016e-21	0.464136378062416	0.9	0.691	1.86219556119697e-17	3	Rps5
Gnb2l1.1	4.38094154344148e-21	0.422863449467217	0.825	0.544	6.06760403766645e-17	3	Gnb2l1
Eef1a1.1	4.45541098170098e-21	0.422552586518149	0.9	0.725	6.17074420965586e-17	3	Eef1a1
Iqgap1	5.19641206976837e-21	0.38256334382148	0.588	0.254	7.19703071662919e-17	3	Iqgap1
Nid1.3	5.66051699532494e-21	-0.672942284462331	0.044	0.427	7.83981603852504e-17	3	Nid1
Igfbp5.1	6.25721303627234e-21	-1.24538046454443	0.075	0.456	8.66624005523719e-17	3	Igfbp5
4931406P16Rik	7.51803119652964e-21	0.257581227383589	0.344	0.096	1.04124732071936e-16	3	4931406P16Rik
Rpl18a	9.33523808370786e-21	0.364339485226688	0.713	0.359	1.29293047459354e-16	3	Rpl18a
Itih5.2	9.41229248566234e-21	0.350386085308881	0.556	0.216	1.30360250926423e-16	3	Itih5
Aebp1.2	1.12036492789434e-20	-0.769212986864758	0.056	0.444	1.55170542513366e-16	3	Aebp1
Col5a2.2	2.13938560976588e-20	-0.650030790476421	0.044	0.425	2.96304906952574e-16	3	Col5a2
Ifitm3.1	2.2431633663278e-20	0.417845026512563	0.963	0.732	3.10678126236401e-16	3	Ifitm3
Meg3.1	2.71090857807153e-20	-0.744190193379427	0.056	0.431	3.75460838062907e-16	3	Meg3
Lum.3	2.96386819877116e-20	-1.52168344472463	0.206	0.552	4.10495745529806e-16	3	Lum
Psap	4.68287992507717e-20	-0.512368833948796	0.238	0.603	6.48578869623188e-16	3	Psap
Rpl14.1	9.7831636847114e-20	0.391582423322975	0.906	0.623	1.35496817033253e-15	3	Rpl14
Timp2.2	1.21496619696819e-19	-0.758789869643209	0.231	0.576	1.68272818280095e-15	3	Timp2
Col6a1.3	1.32898302056471e-19	-0.596605360553282	0.038	0.406	1.84064148348213e-15	3	Col6a1
Pcolce.3	1.6194286216516e-19	-0.727803488090795	0.062	0.432	2.24290864098747e-15	3	Pcolce
Rps15.2	2.14411268749998e-19	0.434042767248619	0.9	0.743	2.96959607218747e-15	3	Rps15
Rps15a.1	2.48907557777863e-19	0.405915660041896	0.881	0.638	3.44736967522341e-15	3	Rps15a
Rplp1.3	3.35931536465276e-19	0.383063281339704	0.988	0.906	4.65265178004407e-15	3	Rplp1
Smoc2.2	3.90741690074174e-19	-1.31234163936455	0.088	0.442	5.41177240752731e-15	3	Smoc2
Rpl23.1	7.1076111912922e-19	0.399836778497636	0.806	0.542	9.84404149993969e-15	3	Rpl23
Arpc2	8.44190318662529e-19	0.381020356871828	0.725	0.391	1.1692035913476e-14	3	Arpc2
Rpl8.2	1.53048287083104e-18	0.380713381568947	0.887	0.664	2.11971877610098e-14	3	Rpl8
Atox1.1	1.61871899797494e-18	0.365902699572988	0.681	0.351	2.2419258121953e-14	3	Atox1
Cpe.2	2.20984069624788e-18	-0.595986620378557	0.062	0.416	3.06062936430331e-14	3	Cpe
Pdcd4	2.88966392736559e-18	0.36854411650872	0.438	0.169	4.00218453940134e-14	3	Pdcd4
Limch1.1	2.92780833685587e-18	0.283667251825275	0.4	0.131	4.05501454654539e-14	3	Limch1
Col6a2.3	4.2974968413975e-18	-0.5431507055432	0.031	0.379	5.95203312533553e-14	3	Col6a2
Entpd2.3	5.6146734346232e-18	-0.531054698567131	0.019	0.361	7.77632270695314e-14	3	Entpd2
Wdr89.1	7.75854412539578e-18	0.364059808211014	0.838	0.551	1.07455836136732e-13	3	Wdr89
Plcb4	9.01600735619788e-18	0.317804987559366	0.488	0.194	1.24871701883341e-13	3	Plcb4
Tuba1a.2	9.17427323622221e-18	-0.595170688017491	0.194	0.533	1.27063684321678e-13	3	Tuba1a
Pfdn5	1.11322266512896e-17	0.389268160893298	0.694	0.383	1.54181339120361e-13	3	Pfdn5
Srp14	1.31689989960875e-17	0.356965599368769	0.537	0.247	1.82390636095812e-13	3	Srp14
Rpl22.2	1.76379622128301e-17	0.45549477888736	0.8	0.542	2.44285776647697e-13	3	Rpl22
Nfkbia.2	1.96426736636804e-17	0.286405748092176	0.725	0.365	2.72051030241974e-13	3	Nfkbia
Abca8a.3	1.96644169294495e-17	-0.597038741433468	0.069	0.408	2.72352174472875e-13	3	Abca8a
Rps10.1	2.02880218741474e-17	0.373406827071338	0.863	0.586	2.80989102956942e-13	3	Rps10
Rpl41.1	2.46452294813478e-17	0.370592898200687	0.975	0.851	3.41336428316667e-13	3	Rpl41
Igfbp6.2	3.21034513208711e-17	-1.31104092320234	0.156	0.482	4.44632800794064e-13	3	Igfbp6
Apod.3	3.78276883459451e-17	-2.3630888039561	0.75	0.83	5.2391348359134e-13	3	Apod
Arl2bp	4.22573178065395e-17	0.293755715298653	0.344	0.114	5.85263851620573e-13	3	Arl2bp
Tek	4.43930782504436e-17	0.253620709857309	0.338	0.108	6.14844133768644e-13	3	Tek
B2m.1	5.78401005331819e-17	0.349584649713708	0.944	0.794	8.01085392384569e-13	3	B2m
Pam.1	6.43759772054183e-17	0.403454479827768	0.637	0.331	8.91607284295043e-13	3	Pam
Klf2.1	6.45325037800868e-17	0.402699382250012	0.738	0.417	8.93775177354201e-13	3	Klf2
Ccnd2.1	6.57781412382432e-17	0.311604980570654	0.438	0.175	9.11027256149668e-13	3	Ccnd2
Cp.3	9.04004678414166e-17	-1.11018174035093	0.05	0.377	1.25204647960362e-12	3	Cp
Serpinh1.3	1.01064336091125e-16	-0.572123673490484	0.312	0.609	1.39974105486209e-12	3	Serpinh1
Crim1	1.09747432926276e-16	0.323635089860532	0.344	0.117	1.52000194602893e-12	3	Crim1
Rpl4.2	1.26004294121037e-16	0.421464804603052	0.875	0.701	1.74515947357636e-12	3	Rpl4
1810037I17Rik	1.61175912980486e-16	0.315479373671651	0.569	0.27	2.23228639477973e-12	3	1810037I17Rik
Sparc.1	2.05072072733003e-16	-0.686936111177968	0.981	0.983	2.8402482073521e-12	3	Sparc
Hspa5.2	2.23056353186118e-16	-0.607884686897079	0.462	0.717	3.08933049162774e-12	3	Hspa5
Mfap5.2	2.7703909091649e-16	-0.656675132061723	0.019	0.333	3.83699140919339e-12	3	Mfap5
Islr.2	5.91858730443978e-16	-0.478301061729064	0.019	0.328	8.19724341664909e-12	3	Islr
Crispld2.2	6.90141271391113e-16	-0.792927769424297	0.025	0.337	9.55845660876692e-12	3	Crispld2
Gnai2	1.18308740092001e-15	0.352890864911502	0.662	0.365	1.63857605027422e-11	3	Gnai2
AW112010.1	1.39192657875956e-15	0.252280145400865	0.438	0.174	1.92781831158198e-11	3	AW112010
Myl12a.1	1.50488641771239e-15	0.369118447874087	0.769	0.494	2.08426768853166e-11	3	Myl12a
Cd59a.3	1.62082781560806e-15	0.314689197105101	0.569	0.264	2.24484652461717e-11	3	Cd59a
Sypl	1.66499407859626e-15	0.25279583084418	0.425	0.169	2.30601679885582e-11	3	Sypl
C1ra.1	1.899213460893e-15	-0.440076208704262	0.025	0.331	2.63041064333681e-11	3	C1ra
Mcl1	2.05280371015931e-15	0.339403746739555	0.537	0.259	2.84313313857064e-11	3	Mcl1
Psme1	2.38326784079432e-15	0.302632286904493	0.456	0.196	3.30082595950013e-11	3	Psme1
Matn2.3	2.82345897690632e-15	-0.54226714960081	0.025	0.327	3.91049068301525e-11	3	Matn2
Ifnar2	3.07955104301235e-15	0.272327258666514	0.381	0.149	4.26517819457211e-11	3	Ifnar2
Tpm3	3.12373104210738e-15	0.340481398387166	0.613	0.325	4.32636749331872e-11	3	Tpm3
Rhob	4.24732979456216e-15	0.373271985094033	0.631	0.341	5.88255176546859e-11	3	Rhob
Eef1b2.1	7.43086888319726e-15	0.322279804106813	0.681	0.376	1.02917534032282e-10	3	Eef1b2
Anxa1	7.46896183959526e-15	-0.494908544531174	0.094	0.399	1.03445121478394e-10	3	Anxa1
Txnip.1	1.0382662234052e-14	0.296477293075352	0.669	0.349	1.4379987194162e-10	3	Txnip
Add3.1	1.25082437022937e-14	-0.436311610202771	0.038	0.337	1.73239175276768e-10	3	Add3
Lrp1.2	1.37664878123253e-14	-0.410913533067672	0.025	0.319	1.90665856200705e-10	3	Lrp1
Smarca2	1.51294025404371e-14	0.312269322066604	0.462	0.205	2.09542225185053e-10	3	Smarca2
Rps10-ps1	1.79403719139336e-14	0.266105250392707	0.619	0.314	2.48474151007981e-10	3	Rps10-ps1
Cd302.3	2.05167769103093e-14	-0.449456677389699	0.044	0.336	2.84157360207784e-10	3	Cd302
Foxp1	2.3555037673667e-14	0.258005772141531	0.425	0.175	3.26237271780288e-10	3	Foxp1
Tgfbi.2	3.39735718824185e-14	-0.574096449825699	0.019	0.305	4.70533970571496e-10	3	Tgfbi
Col15a1.2	3.50332194499549e-14	-0.739126242299635	0.094	0.387	4.85210089381876e-10	3	Col15a1
Rps26.2	3.62476493456943e-14	0.339838524796404	0.869	0.648	5.02029943437867e-10	3	Rps26
Rnase4.2	5.09353367912921e-14	-0.633830603403526	0.138	0.425	7.05454414559395e-10	3	Rnase4
Rps16	5.21320643938889e-14	0.272088918053153	0.531	0.263	7.22029091855361e-10	3	Rps16
Ccl11.2	5.40465358212373e-14	-0.612618574959584	0.044	0.33	7.48544521124137e-10	3	Ccl11
Itm2a.2	5.49671638765187e-14	-0.605769222208909	0.106	0.394	7.61295219689784e-10	3	Itm2a
Ecm1.3	7.28815617215678e-14	-0.613208738388177	0.106	0.391	1.00940962984371e-09	3	Ecm1
Ptma	7.39472294431933e-14	0.307891943067426	0.719	0.419	1.02416912778823e-09	3	Ptma
Cpxm1.2	1.07863988705255e-13	-0.537493870848152	0.031	0.31	1.49391624356779e-09	3	Cpxm1
Tspo	1.18883664760518e-13	0.302404532583434	0.531	0.265	1.64653875693318e-09	3	Tspo
Ly6a.3	1.25113195616526e-13	0.263411573751212	0.725	0.377	1.73281775928888e-09	3	Ly6a
Nr2f2.2	1.26615047419001e-13	-0.459810052221246	0.044	0.325	1.75361840675316e-09	3	Nr2f2
Clic4	1.83058306951528e-13	0.290399816435076	0.488	0.229	2.53535755127866e-09	3	Clic4
Apold1.1	1.87943820197386e-13	0.317294661268209	0.262	0.082	2.6030219097338e-09	3	Apold1
Abi3bp.2	1.9569690510396e-13	-0.469190355507647	0.038	0.316	2.71040213568985e-09	3	Abi3bp
Fbn1.2	1.98993888602449e-13	-0.582956244924909	0.05	0.328	2.75606535714393e-09	3	Fbn1
Esyt2	2.20753381980243e-13	0.257083143160316	0.356	0.141	3.05743434042636e-09	3	Esyt2
Lpl.2	2.56875863742589e-13	-0.659688783012566	0.013	0.28	3.55773071283485e-09	3	Lpl
Rpl13.1	3.02173333207298e-13	0.313418826756713	0.775	0.511	4.18510066492108e-09	3	Rpl13
Srrm2	3.38653423911187e-13	0.342097411259767	0.631	0.359	4.69034992116993e-09	3	Srrm2
Col5a1.3	3.46856779391994e-13	-0.398027742703815	0.044	0.319	4.80396639457912e-09	3	Col5a1
Bgn.2	3.75319037304422e-13	-0.519691067942208	0.062	0.34	5.19816866666624e-09	3	Bgn
Selm	3.80527839135377e-13	-0.353132884387428	0.125	0.416	5.27031057202497e-09	3	Selm
Kmt2e	4.13979563789458e-13	0.324847522580336	0.556	0.288	5.73361695848399e-09	3	Kmt2e
Pmp22.2	4.27230116155211e-13	-0.949094248418803	0.119	0.403	5.91713710874967e-09	3	Pmp22
Scara5.3	5.4205852416649e-13	-0.416898797826751	0.019	0.282	7.50751055970589e-09	3	Scara5
Msn	5.79014589918036e-13	0.288724473747998	0.506	0.247	8.01935207036479e-09	3	Msn
Tppp3.2	6.98001191328533e-13	-0.430158603155685	0.038	0.302	9.66731649990018e-09	3	Tppp3
Myl12b	7.33081317796756e-13	0.306132986309385	0.662	0.389	1.01531762514851e-08	3	Myl12b
Scn7a.1	9.46497263279601e-13	-0.781344225923684	0.013	0.267	1.31089870964225e-08	3	Scn7a
Clec3b.2	1.06096966762767e-12	-0.753847505468888	0.031	0.292	1.46944298966433e-08	3	Clec3b
Rps3a1.1	1.29089243048058e-12	0.357704537447814	0.75	0.521	1.7878860162156e-08	3	Rps3a1
Rpl30	1.29543078017487e-12	0.254337596470876	0.494	0.242	1.7941716305422e-08	3	Rpl30
Aplp2.1	1.3900284912156e-12	0.309640804160099	0.725	0.44	1.92518946033361e-08	3	Aplp2
Lamb1.1	1.55374344434007e-12	-0.377838887015311	0.019	0.273	2.151934670411e-08	3	Lamb1
Fosb.3	1.55517266237497e-12	-0.915449537328368	0.338	0.584	2.15391413738933e-08	3	Fosb
Rps8.1	1.91008942923572e-12	0.322383844568578	0.731	0.475	2.64547385949147e-08	3	Rps8
Pdgfra.3	2.0216949164734e-12	-0.37366351560483	0.013	0.264	2.80004745931566e-08	3	Pdgfra
Arglu1	2.09286010435175e-12	0.301919025937814	0.575	0.312	2.89861124452718e-08	3	Arglu1
Ythdc1	2.17592445136422e-12	0.27927662411162	0.475	0.227	3.01365536513945e-08	3	Ythdc1
Rpl27a	2.55916082321256e-12	0.263997417836507	0.456	0.219	3.54443774014939e-08	3	Rpl27a
Igf1.2	2.64108325380757e-12	-0.492142762418241	0.025	0.278	3.65790030652349e-08	3	Igf1
Scd2.2	2.88030476463934e-12	-0.55345525393836	0.15	0.416	3.98922209902549e-08	3	Scd2
Col5a3.1	4.24219561293081e-12	-0.3913519706317	0.044	0.299	5.87544092390918e-08	3	Col5a3
Rps28.1	4.34451802117338e-12	0.293688310599347	0.631	0.371	6.01715745932513e-08	3	Rps28
Zeb2.1	4.74997931748499e-12	-0.469767900646836	0.062	0.32	6.57872135471672e-08	3	Zeb2
Sdc4.1	4.78453768267305e-12	-0.406965483483399	0	0.238	6.62658469050217e-08	3	Sdc4
Lama2.1	4.82616291902483e-12	-0.394588120609063	0.025	0.276	6.68423564284939e-08	3	Lama2
Rpl36	6.39392204031221e-12	0.250476625472645	0.531	0.28	8.85558202583241e-08	3	Rpl36
Sdc2.2	7.76144320490717e-12	-0.336644868233629	0.025	0.269	1.07495988387964e-07	3	Sdc2
Pls3	7.81095020080757e-12	0.259113286311645	0.356	0.153	1.08181660281185e-07	3	Pls3
Hsp90ab1.1	8.21788671029543e-12	0.263303725137377	0.981	0.905	1.13817730937592e-07	3	Hsp90ab1
Gm10260	1.10135439669806e-11	0.302385633278928	0.625	0.386	1.52537583942682e-07	3	Gm10260
Efemp1.2	1.32138071996291e-11	-0.340246663837522	0.013	0.248	1.83011229714862e-07	3	Efemp1
Igfbp4.3	1.4267035817054e-11	-0.60475653436422	0.206	0.45	1.97598446066198e-07	3	Igfbp4
Dbi.3	2.12037773355993e-11	-0.83445538969421	0.281	0.518	2.9367231609805e-07	3	Dbi
Hsp90b1.1	2.31249413467869e-11	-0.416892643873297	0.631	0.77	3.20280437652999e-07	3	Hsp90b1
Akr1a1	2.51151934870529e-11	0.280436055780467	0.625	0.374	3.47845429795682e-07	3	Akr1a1
Rps25	2.8201827565335e-11	0.296644583167033	0.625	0.404	3.9059531177989e-07	3	Rps25
Ccdc80.3	2.89882003278722e-11	-0.554350023594885	0.006	0.233	4.01486574541029e-07	3	Ccdc80
Atp1a2.2	3.00774423968109e-11	-0.49580760076966	0.025	0.259	4.16572577195831e-07	3	Atp1a2
Bicc1.2	3.05948901380942e-11	-0.324949423094938	0.019	0.25	4.23739228412605e-07	3	Bicc1
Nupr1.2	3.38095591727492e-11	-0.371649637981705	0.025	0.26	4.68262394542577e-07	3	Nupr1
Dpep1.3	3.42755708712495e-11	-0.452377585573914	0.038	0.276	4.74716656566805e-07	3	Dpep1
Ncl.1	3.61186972480861e-11	0.306482228972969	0.681	0.429	5.00243956885993e-07	3	Ncl
Sh3bgrl	4.15075496596589e-11	0.255833629012161	0.488	0.255	5.74879562786275e-07	3	Sh3bgrl
Gm5077.1	5.55047127076941e-11	-0.258545478365126	0	0.217	7.68740271001563e-07	3	Gm5077
Gpx8.1	5.76215732343893e-11	-0.281400021704589	0.013	0.24	7.98058789296292e-07	3	Gpx8
Vit.2	7.37639633425127e-11	-0.303981610074534	0.013	0.234	1.0216308922938e-06	3	Vit
Adamts5.1	7.41400788864096e-11	-0.352669183836079	0	0.216	1.02684009257677e-06	3	Adamts5
Gm10263	9.83623219714954e-11	0.255359100989156	0.431	0.22	1.36231815930521e-06	3	Gm10263
Rcn3.2	1.05415215254693e-10	-0.425969594553089	0.188	0.43	1.46000073127749e-06	3	Rcn3
Procr.3	1.24379931828358e-10	0.255766554552195	0.4	0.187	1.72266205582276e-06	3	Procr
Cryab.3	1.25451300624152e-10	-0.542923748442521	0.05	0.282	1.73750051364451e-06	3	Cryab
Maf.1	1.2739699384928e-10	-0.329904487326947	0.006	0.222	1.76444836481252e-06	3	Maf
Tagln2.1	1.35928366636493e-10	0.266878944822018	0.488	0.252	1.88260787791542e-06	3	Tagln2
Gm6472	1.83098948225794e-10	0.282438096714554	0.525	0.3	2.53592043292725e-06	3	Gm6472
Rps26-ps1	1.9185614091351e-10	0.254889499349981	0.588	0.354	2.65720755165212e-06	3	Rps26-ps1
Rps3a3.1	2.13091782001804e-10	0.38937897035654	0.55	0.338	2.95132118072499e-06	3	Rps3a3
Golim4	3.08770392460269e-10	0.350650763829104	0.394	0.202	4.27646993557472e-06	3	Golim4
Rpl6	3.2212021520061e-10	0.273309835152308	0.556	0.335	4.46136498052845e-06	3	Rpl6
Mxra8.1	3.35162718990557e-10	-0.282458423616654	0.038	0.257	4.64200365801921e-06	3	Mxra8
Ddah2	3.58356717679969e-10	-0.287034508886979	0.044	0.265	4.96324053986758e-06	3	Ddah2
Kif5b.1	4.45528101612516e-10	0.253122586756916	0.575	0.332	6.17056420733334e-06	3	Kif5b
Calr.1	4.75619540274692e-10	-0.412653321549914	0.444	0.615	6.58733063280448e-06	3	Calr
Apoe.1	4.7896276163239e-10	-0.939462001619956	0.594	0.704	6.6336342486086e-06	3	Apoe
Sod3.2	4.92425812404685e-10	-0.285950184674039	0.025	0.237	6.82009750180488e-06	3	Sod3
Tpm4	5.24590852930044e-10	0.261654902400951	0.494	0.265	7.26558331308111e-06	3	Tpm4
Gas5	6.2345744616921e-10	0.311736108385751	0.688	0.462	8.63488562944356e-06	3	Gas5
Thbs4.3	7.40248083839041e-10	-0.354714543389303	0.006	0.206	1.02524359611707e-05	3	Thbs4
Il33.2	7.99751595341396e-10	-0.363382022305436	0.031	0.242	1.10765595954783e-05	3	Il33
Prelp.1	8.29226711356964e-10	-0.294254370846584	0.031	0.243	1.14847899522939e-05	3	Prelp
Ebf2.2	9.68150319403434e-10	-0.266351752300351	0.013	0.213	1.34088819237376e-05	3	Ebf2
Fn1.2	1.00975961386475e-09	-0.703452086436264	0.2	0.412	1.39851706520267e-05	3	Fn1
Cyr61.2	1.07278186314642e-09	0.557676863430749	0.544	0.334	1.48580288045779e-05	3	Cyr61
Abca8b.2	1.27761093122878e-09	-0.293623761131633	0.006	0.202	1.76949113975186e-05	3	Abca8b
Frmd6.1	1.36060827688914e-09	-0.270603459385459	0.013	0.211	1.88444246349145e-05	3	Frmd6
Sema3b.1	1.56153585877052e-09	-0.277219607794565	0.006	0.2	2.16272716439717e-05	3	Sema3b
Ndrg2.1	1.66880264089624e-09	-0.280443200719965	0.013	0.211	2.3112916576413e-05	3	Ndrg2
Atrx	2.03141866168277e-09	0.281280797974266	0.488	0.273	2.81351484643063e-05	3	Atrx
Olfml3.2	2.03449329535066e-09	-0.301917770601912	0.019	0.218	2.81777321406066e-05	3	Olfml3
Ckb.2	2.06599212896155e-09	-0.296623520809681	0.019	0.218	2.86139909861175e-05	3	Ckb
Gltscr2	2.11998086312513e-09	0.254853089752407	0.469	0.257	2.93617349542831e-05	3	Gltscr2
Mmp14.1	2.33121027297606e-09	-0.276088898434854	0.044	0.256	3.22872622807184e-05	3	Mmp14
Errfi1.2	3.36593732276625e-09	-0.520096911393669	0.081	0.293	4.66182319203125e-05	3	Errfi1
Postn.1	4.18766767223512e-09	-0.412287139715253	0.006	0.191	5.79991972604564e-05	3	Postn
Serbp1	4.49803785315024e-09	0.265857717802051	0.688	0.45	6.22978242661308e-05	3	Serbp1
Anxa5	4.77260784671073e-09	-0.311655303679074	0.269	0.487	6.61006186769436e-05	3	Anxa5
Cebpb	4.91799109656926e-09	-0.361493447617568	0.038	0.234	6.81141766874842e-05	3	Cebpb
Il11ra1.2	5.35252466649767e-09	-0.400129789992662	0.062	0.266	7.41324666309928e-05	3	Il11ra1
Cpxm2.2	5.6069774031432e-09	-0.322022991445602	0.019	0.209	7.76566370335334e-05	3	Cpxm2
Fkbp7.1	6.48214076580335e-09	-0.275885521451806	0.069	0.278	8.97776496063764e-05	3	Fkbp7
Gpm6b.3	6.69357081687653e-09	-0.511476665455653	0.031	0.222	9.27059558137399e-05	3	Gpm6b
Lpar1	6.93998631590632e-09	-0.270981090196343	0.019	0.208	9.61188104753025e-05	3	Lpar1
Adamts2.1	7.70357667591917e-09	-0.285507895970254	0.038	0.235	0.000106694536961481	3	Adamts2
C3.2	7.77953670609079e-09	-0.594528229501106	0.025	0.213	0.000107746583379357	3	C3
Abca6.3	8.24062350426347e-09	-0.351657371946753	0.013	0.195	0.000114132635534049	3	Abca6
Hmgcs1.1	8.24858893135473e-09	-0.330565822157246	0.025	0.215	0.000114242956699263	3	Hmgcs1
Abca9.2	9.87239020606759e-09	-0.292991458009752	0.025	0.213	0.000136732604354036	3	Abca9
Prrx1.2	1.01879320830858e-08	-0.339415059061864	0.044	0.239	0.000141102859350738	3	Prrx1
Lgi4.2	1.23279862920451e-08	-0.422266047386931	0.013	0.191	0.000170742610144825	3	Lgi4
Sept11	1.39647669742866e-08	-0.256762853240414	0.025	0.213	0.000193412022593869	3	Sept11
Cyb5.1	1.62264226194944e-08	-0.29397312164665	0.188	0.401	0.000224735953279997	3	Cyb5
Btg2.1	2.20093361373018e-08	0.289479349370519	0.688	0.449	0.00030482930550163	3	Btg2
Ndufa6	2.23422178381097e-08	0.257746461258745	0.569	0.363	0.000309439717057819	3	Ndufa6
Enpp2.3	2.24368763912138e-08	-0.433896566765734	0.05	0.236	0.000310750738018311	3	Enpp2
Fbln2.2	2.53552801006575e-08	-0.407751909514568	0.188	0.394	0.000351170629394106	3	Fbln2
Plp1.3	3.17259680771217e-08	-1.20763078737146	0.056	0.238	0.000439404657868136	3	Plp1
Ackr3.1	5.41201146510163e-08	-0.271399938370006	0.025	0.198	0.000749563587916575	3	Ackr3
Cd248.2	6.69094650928152e-08	-0.272791348469315	0	0.157	0.000926696091535491	3	Cd248
Lamc1.1	6.75867348913704e-08	-0.286795547571024	0.119	0.315	0.00093607627824548	3	Lamc1
Fam46a	7.63764695686593e-08	-0.264844796581589	0.006	0.166	0.00105781410352593	3	Fam46a
Gm10076	7.70993953754604e-08	0.256654988322105	0.588	0.401	0.00106782662595013	3	Gm10076
Vkorc1	1.19235151876309e-07	-0.276843099074417	0.106	0.294	0.00165140685348688	3	Vkorc1
Col6a3.2	1.29717320386232e-07	-0.26781547381474	0.05	0.226	0.00179658488734931	3	Col6a3
F3.1	1.32396023995342e-07	-0.250894166723708	0.013	0.171	0.00183368493233549	3	F3
Aspn.3	1.37062378444045e-07	-0.419945769998441	0.044	0.214	0.00189831394145003	3	Aspn
Dpt.3	1.43362101571441e-07	-0.680368978537364	0.05	0.22	0.00198556510676445	3	Dpt
Ecm2.1	1.50156274059543e-07	-0.288979138974756	0.062	0.249	0.00207966439572467	3	Ecm2
Lsp1.2	1.68547291936704e-07	-0.263600697325467	0.019	0.178	0.00233437999332335	3	Lsp1
Phlda1.1	2.13938235435918e-07	-0.49068620959068	0.106	0.288	0.00296304456078746	3	Phlda1
Gadd45g.2	2.83333552757926e-07	0.280459832590944	0.488	0.298	0.00392416970569728	3	Gadd45g
S100a11.1	2.98236431083455e-07	-0.29603272624677	0.275	0.465	0.00413057457050585	3	S100a11
Socs3.3	3.04647305289324e-07	-0.478411461555134	0.188	0.368	0.00421936517825713	3	Socs3
Cnp.3	3.25466835031958e-07	-0.425198144678083	0.031	0.189	0.00450771566519262	3	Cnp
Myoc.3	3.54921075020715e-07	-0.408685365180061	0.013	0.162	0.00491565688903691	3	Myoc
Col8a1.2	3.74269984864635e-07	-0.342886626798877	0.062	0.235	0.0051836392903752	3	Col8a1
Plekha4.2	4.08966107546862e-07	-0.32227852221388	0.013	0.16	0.00566418058952403	3	Plekha4
Lbp.2	4.61583644958918e-07	-0.251405424231649	0.025	0.18	0.00639293348268101	3	Lbp
Dnajb4	4.97127013996128e-07	-0.256189764672667	0.056	0.223	0.00688520914384637	3	Dnajb4
Angptl7.3	5.63703521268187e-07	-0.963059177570363	0.069	0.231	0.00780729376956438	3	Angptl7
Serpine2.1	5.80230377695551e-07	-0.297175814644032	0.062	0.225	0.00803619073108338	3	Serpine2
Art3.3	5.8185597544475e-07	-0.291825219854525	0.025	0.178	0.00805870525990979	3	Art3
Vimp.1	7.2718383044226e-07	-0.256705276915782	0.088	0.257	0.0100714960516253	3	Vimp
Fst.2	7.6519135199629e-07	-0.311340596677949	0.013	0.155	0.0105979002251486	3	Fst
Cxcl1.2	8.10527424311762e-07	-0.594539817725152	0.056	0.22	0.0112258048267179	3	Cxcl1
Angptl1.1	8.31208749211858e-07	-0.301509051585618	0.019	0.166	0.0115122411765842	3	Angptl1
Mbp.3	8.68171341286472e-07	-0.874623272646833	0.062	0.221	0.0120241730768176	3	Mbp
Col14a1.2	9.75861700799579e-07	-0.288759256961622	0.013	0.154	0.0135156845560742	3	Col14a1
Egr1.3	1.21869839340111e-06	-0.576208383028842	0.775	0.789	0.0168789727486054	3	Egr1
Osr2.2	1.22121181518586e-06	-0.264415335548577	0.006	0.141	0.0169137836403241	3	Osr2
Sfrp1.3	1.65213459124176e-06	-0.358331670626487	0.019	0.157	0.0228820640886984	3	Sfrp1
H3f3b.2	1.69352548762935e-06	-0.368504102154629	0.356	0.51	0.0234553280036665	3	H3f3b
Gas1.3	1.82264328600178e-06	-0.334088059016494	0.038	0.184	0.0252436095111247	3	Gas1
Celf2.1	2.04682675993643e-06	-0.254162930988419	0.081	0.239	0.0283485506251195	3	Celf2
Sfrp4.3	2.20679974302668e-06	-0.776389413901447	0.044	0.192	0.0305641764409195	3	Sfrp4
C4b.3	2.83226215660053e-06	-0.252928237434695	0.019	0.153	0.0392268308689173	3	C4b
Cygb.2	2.93881893086032e-06	-0.270006345745878	0.062	0.215	0.0407026421924154	3	Cygb
mt-Cytb.1	3.05562727022734e-06	-0.326516433808826	0.887	0.914	0.0423204376926487	3	mt-Cytb
Fabp4.3	3.2850213259057e-06	-1.61914353229668	0.244	0.396	0.045497545363794	3	Fabp4
Calm2	3.52456381506957e-06	-0.322985180391	0.3	0.451	0.0488152088387135	3	Calm2
Nbl1.2	4.13728537633738e-06	-0.311017488089581	0.069	0.218	0.0573014024622727	3	Nbl1
Gatm.3	4.79331696877927e-06	-0.352215443609051	0.025	0.155	0.0663874400175928	3	Gatm
Chrdl1.2	5.49914512739819e-06	-0.272934215817225	0.031	0.167	0.0761631600144649	3	Chrdl1
Junb.3	6.33729950140307e-06	-0.518018637235513	0.775	0.781	0.0877715980944325	3	Junb
Kcna1.3	6.3717440716224e-06	-0.385266885105632	0.025	0.153	0.0882486553919702	3	Kcna1
Cadm4.3	6.57510798272008e-06	-0.306780016809946	0.019	0.145	0.0910652455606731	3	Cadm4
Adamts1.2	7.18577703842624e-06	-0.451165787359655	0.162	0.325	0.0995230119822034	3	Adamts1
Dusp6.2	8.91728603670635e-06	-0.366370094156859	0.075	0.215	0.123504411608383	3	Dusp6
Nudt4.2	9.70230806456708e-06	-0.262762950743449	0.1	0.249	0.134376966694254	3	Nudt4
Sostdc1.3	9.80921514981797e-06	-0.346558321871447	0.013	0.131	0.135857629824979	3	Sostdc1
Rasgrp2.3	1.03133231654293e-05	-0.254826392131219	0.062	0.2	0.142839525841196	3	Rasgrp2
Pi16.3	1.4374760591657e-05	-0.630668839061323	0.025	0.147	0.199090434194449	3	Pi16
Mpz.3	1.62798614470921e-05	-1.49001260234205	0.081	0.218	0.225476081042226	3	Mpz
Mustn1.2	2.04194968714383e-05	-0.304255942180758	0.044	0.171	0.28281003166942	3	Mustn1
Cfh.2	2.40353430055472e-05	-0.44523105183984	0.05	0.175	0.332889500626829	3	Cfh
Cdkn1a.1	2.4160848560407e-05	-0.307323534897665	0.05	0.177	0.334627752561636	3	Cdkn1a
Tsc22d4.1	2.79551659929963e-05	-0.273923351361569	0.094	0.231	0.387179049002998	3	Tsc22d4
Ank3.2	3.1935494302342e-05	-0.282049174582909	0.031	0.148	0.442306596087437	3	Ank3
Ltbp4.3	3.59693032259384e-05	-0.322633346047571	0.156	0.3	0.498174849679246	3	Ltbp4
Inmt.3	8.16333046433915e-05	-0.468005626583062	0.013	0.111	1	3	Inmt
Pcolce2.3	8.85019570752436e-05	-0.311369691395804	0.044	0.154	1	3	Pcolce2
Fbln1.3	0.000109725244147111	-0.283509330893542	0.05	0.163	1	3	Fbln1
Myh11.3	0.000110793055839494	-0.551919509690516	0.013	0.108	1	3	Myh11
Cd9.1	0.000112203489691556	-0.392728832329703	0.45	0.556	1	3	Cd9
Cald1.1	0.000125764786607506	-0.447660655898747	0.319	0.446	1	3	Cald1
Htra1.2	0.000125853776511676	-0.280935248313314	0.219	0.345	1	3	Htra1
Nr4a1.2	0.000130681915675678	-0.388536921433337	0.275	0.411	1	3	Nr4a1
Tpm2.3	0.000133959073817837	-0.642102224003424	0.044	0.15	1	3	Tpm2
Cd36.3	0.000136780844517479	-0.596515842607361	0.069	0.179	1	3	Cd36
Fos.3	0.000161710615100708	-0.534271205981034	0.838	0.841	1	3	Fos
Sfrp5.2	0.00020690427313483	-0.583284247038472	0.025	0.12	1	3	Sfrp5
Plvap.3	0.000261338702261804	-0.487014975072272	0.044	0.143	1	3	Plvap
Sfrp2.3	0.000427949116498765	-0.50695714698807	0.038	0.131	1	3	Sfrp2
Vwa1.3	0.00057049660351117	-0.250461359965167	0.256	0.37	1	3	Vwa1
Cwc22	0.000609218591487376	0.278713402469021	0.338	0.23	1	3	Cwc22
Gstm1.1	0.000623316569260815	-0.259511195485085	0.262	0.377	1	3	Gstm1
Trf.2	0.000671409354770698	-0.255917897575164	0.038	0.127	1	3	Trf
Nfkbiz.1	0.00304755359559236	-0.257109242744608	0.169	0.262	1	3	Nfkbiz
S100a10.2	0.00398511373255956	-0.257263902526164	0.419	0.477	1	3	S100a10
Acta2.3	0.00549091232644687	-0.291781459454225	0.288	0.185	1	3	Acta2
Aqp1.3	0.00741295770829701	-0.438155925931322	0.075	0.146	1	3	Aqp1
Rbp7	9.17513660078324e-180	1.49809226467366	0.68	0.03	1.27075641920848e-175	4	Rbp7
Cd36.4	6.73166026137284e-152	1.84108004038654	0.898	0.11	9.32334946200139e-148	4	Cd36
Gpihbp1	9.15159508016359e-141	1.20628778969157	0.585	0.031	1.26749591860266e-136	4	Gpihbp1
Cd300lg	1.945449520019e-114	0.747225362115627	0.517	0.032	2.69444758522631e-110	4	Cd300lg
Btnl9	3.17467146649271e-106	0.541373307911478	0.32	0.005	4.39691998109241e-102	4	Btnl9
Fabp4.4	1.84145941829769e-98	2.31948829738893	0.993	0.334	2.5504212943423e-94	4	Fabp4
Egfl7.4	3.29100088326869e-86	1.0265487039922	0.905	0.2	4.55803622332713e-82	4	Egfl7
Ushbp1.1	1.83330282821023e-83	0.663768265014427	0.619	0.084	2.53912441707117e-79	4	Ushbp1
Clic5	1.9054324841963e-77	0.533848254057747	0.456	0.042	2.63902399061188e-73	4	Clic5
Fam101b.2	3.44968477348659e-75	0.820652077323985	0.605	0.09	4.77781341127893e-71	4	Fam101b
Ly6e.3	4.24900825341632e-73	1.21238897115736	0.898	0.312	5.8848764309816e-69	4	Ly6e
Ly6c1.4	1.88260115787148e-72	1.28003315061388	0.946	0.328	2.607402603652e-68	4	Ly6c1
Sdpr.4	5.76573026388589e-69	1.09500713790669	0.878	0.244	7.98553641548196e-65	4	Sdpr
Kdr	7.50591952140071e-69	0.748892723902496	0.524	0.073	1.039569853714e-64	4	Kdr
Pecam1.4	3.91321627087104e-67	0.8951686087897	0.735	0.159	5.4198045351564e-63	4	Pecam1
Ptprb.4	1.24250214600423e-63	0.786295662366866	0.714	0.15	1.72086547221585e-59	4	Ptprb
Podxl.1	5.19248149346563e-63	0.636713151183761	0.51	0.075	7.1915868684499e-59	4	Podxl
Mgll.2	2.53823714380045e-62	1.02024557495973	0.762	0.212	3.51545844416363e-58	4	Mgll
Aqp7	1.20213211363921e-60	0.25212968210691	0.197	0.004	1.6649529773903e-56	4	Aqp7
Esam.4	2.69203331659816e-60	0.702012725528907	0.755	0.179	3.72846614348844e-56	4	Esam
Tmem88.1	2.80865342217932e-60	0.532650057314756	0.503	0.075	3.88998498971835e-56	4	Tmem88
Flt1.4	2.20996339222598e-59	0.809883565990429	0.701	0.156	3.06079929823298e-55	4	Flt1
H2-D1.2	2.67012153669909e-57	1.01464379993615	0.986	0.715	3.69811832832824e-53	4	H2-D1
Cav1.4	8.52923049930546e-57	0.92721473280875	0.891	0.368	1.18129842415381e-52	4	Cav1
Tspan13.4	1.60309631126387e-56	0.617479523820728	0.687	0.146	2.22028839110047e-52	4	Tspan13
Nrp1.3	8.09840053482755e-56	0.902694861250427	0.803	0.271	1.12162847407362e-51	4	Nrp1
Icam2.1	4.03390649577837e-54	0.516300499887581	0.449	0.068	5.58696049665304e-50	4	Icam2
Gpr116.4	5.59666794768309e-54	0.688244126042922	0.741	0.181	7.75138510754108e-50	4	Gpr116
Slc9a3r2.3	1.774152352495e-49	0.7671694824486	0.626	0.163	2.45720100820557e-45	4	Slc9a3r2
Rgcc	4.20324281891916e-49	0.793269865955936	0.503	0.098	5.82149130420303e-45	4	Rgcc
Tspan7	1.10670612521191e-48	0.642970900086533	0.544	0.117	1.53278798341849e-44	4	Tspan7
Timp4	3.52724259311633e-48	0.436632388409447	0.259	0.02	4.88523099146612e-44	4	Timp4
Hspb1.4	6.56753735204741e-48	0.78489881494556	0.837	0.275	9.09603923258567e-44	4	Hspb1
Palmd.1	7.95647335660943e-48	0.583528555159378	0.497	0.095	1.10197155989041e-43	4	Palmd
Cdh5.3	8.93044932779963e-48	0.559398482726317	0.612	0.141	1.23686723190025e-43	4	Cdh5
B2m.2	1.11186557929271e-47	0.898268459066827	0.952	0.794	1.5399338273204e-43	4	B2m
Col13a1	3.69334408351648e-47	0.25626669082608	0.17	0.006	5.11528155567033e-43	4	Col13a1
Srgn.4	2.22537685421669e-46	0.63941834138513	0.687	0.192	3.08214694309012e-42	4	Srgn
Tm4sf1.4	2.75985072829112e-46	0.924017143866887	0.83	0.319	3.82239325868321e-42	4	Tm4sf1
Thrsp	5.56311772724528e-46	0.265936876775607	0.218	0.013	7.70491805223471e-42	4	Thrsp
Tmsb4x.3	1.6179414905847e-44	0.915212165562858	0.993	0.837	2.24084896445982e-40	4	Tmsb4x
Eltd1.1	6.66964578392486e-44	0.514803809595716	0.476	0.093	9.23745941073593e-40	4	Eltd1
Sox18	1.17372466652132e-43	0.321872061553363	0.313	0.037	1.62560866313203e-39	4	Sox18
Cxcl12.2	4.81680357841019e-43	1.24660799427994	0.81	0.365	6.67127295609811e-39	4	Cxcl12
Calm1.4	1.06283633782642e-39	0.844869990690844	0.939	0.715	1.4720283278896e-35	4	Calm1
Col1a2.4	2.46573463790474e-39	-2.18089693800715	0.435	0.816	3.41504247349806e-35	4	Col1a2
Cd93.1	5.49592036395788e-39	0.436471567579586	0.49	0.104	7.61184970408167e-35	4	Cd93
Mmrn2.2	6.81147669798505e-39	0.431470175557117	0.517	0.116	9.4338952267093e-35	4	Mmrn2
Myct1.1	1.05694839535841e-38	0.342904729029231	0.374	0.061	1.4638735275714e-34	4	Myct1
Tie1.1	1.09009842536658e-38	0.360713050906782	0.388	0.068	1.50978631913271e-34	4	Tie1
Plvap.4	1.12909464260098e-38	1.0533939743208	0.476	0.107	1.56379608000236e-34	4	Plvap
Tcf15	9.67155267915743e-38	0.295175948295721	0.218	0.019	1.3395100460633e-33	4	Tcf15
Ramp2.2	1.46068844587608e-37	0.710349920510855	0.782	0.335	2.02305349753837e-33	4	Ramp2
Ly6a.4	1.89853702391539e-37	0.783918979788436	0.837	0.37	2.62947377812282e-33	4	Ly6a
C1qtnf9	1.20392670532157e-35	0.55258189945639	0.415	0.088	1.66743848687038e-31	4	C1qtnf9
Gbp4.1	1.948412656506e-35	0.447762741825746	0.429	0.091	2.69855152926081e-31	4	Gbp4
Sox17.1	4.15573403605631e-35	0.396007457639953	0.415	0.083	5.75569163993799e-31	4	Sox17
S1pr1.2	5.10085983182727e-35	0.490412294636804	0.463	0.105	7.06469086708076e-31	4	S1pr1
Gsn.3	5.63078654545225e-35	-1.94232899565083	0.605	0.864	7.79863936545137e-31	4	Gsn
Id1.1	1.51620783711821e-34	0.399470391999338	0.435	0.092	2.09994785440872e-30	4	Id1
H2-K1.2	1.8607780201628e-34	0.720399789946338	0.844	0.478	2.57717755792548e-30	4	H2-K1
Tinagl1.4	3.71686443410931e-34	0.518272795735836	0.612	0.184	5.1478572412414e-30	4	Tinagl1
Gja4	6.62033238142251e-34	0.336623745044587	0.238	0.027	9.16916034827017e-30	4	Gja4
Gimap4.1	1.22965401023483e-33	0.331697276008842	0.381	0.074	1.70307080417524e-29	4	Gimap4
F11r	1.81436896120319e-33	0.366508616592291	0.435	0.097	2.51290101126641e-29	4	F11r
Cyyr1	9.47581293811434e-33	0.2752883462056	0.279	0.04	1.31240009192884e-28	4	Cyyr1
Cav2.1	1.78275818784993e-32	0.444670646410436	0.524	0.146	2.46912009017216e-28	4	Cav2
Dcn.4	3.33494575559809e-32	-2.75157760989773	0.626	0.873	4.61889987150335e-28	4	Dcn
Ets1	7.11700871469047e-32	0.455621830774169	0.415	0.096	9.8570570698463e-28	4	Ets1
Serping1.3	2.17515085778652e-31	-1.13645904960027	0.197	0.67	3.01258393803433e-27	4	Serping1
Rasip1.1	1.00902963211928e-30	0.345701758954627	0.374	0.079	1.39750604048521e-26	4	Rasip1
Cldn5.4	1.16066658213529e-30	0.386195920605636	0.469	0.107	1.60752321625737e-26	4	Cldn5
Arhgef15	2.44763275946865e-30	0.293244229725855	0.293	0.049	3.38997137186408e-26	4	Arhgef15
Emcn.4	2.94667830393828e-30	0.454951491716146	0.503	0.138	4.08114945095452e-26	4	Emcn
Col3a1.4	5.76366109062583e-30	-2.06185487543806	0.503	0.792	7.98267061051677e-26	4	Col3a1
Ednrb.1	2.2146215572128e-29	0.387277092831926	0.293	0.05	3.06725085673973e-25	4	Ednrb
Ifi203	5.41721166320963e-29	0.460188261013023	0.456	0.125	7.50283815354533e-25	4	Ifi203
Col1a1.4	1.60628173687395e-28	-1.63554399614826	0.34	0.716	2.22470020557042e-24	4	Col1a1
Stmn2	2.27394497845443e-28	0.490395612539197	0.245	0.037	3.14941379515938e-24	4	Stmn2
Cst3.4	2.53878066651835e-28	0.726067922021277	0.993	0.859	3.51621122312791e-24	4	Cst3
Psmb8	3.00690734449082e-28	0.375042715163596	0.449	0.119	4.16456667211978e-24	4	Psmb8
Sema3g.1	1.93837418286019e-27	0.356795809943805	0.245	0.038	2.68464824326137e-23	4	Sema3g
Smco4	2.29203927953833e-27	0.404669698583308	0.361	0.084	3.17447440216058e-23	4	Smco4
Lgals1.2	3.60373767711995e-27	-0.802978426987958	0.17	0.637	4.99117668281113e-23	4	Lgals1
Gimap6.1	3.89428024698877e-27	0.352655345491131	0.469	0.13	5.39357814207945e-23	4	Gimap6
Rarres2.3	6.42837854229452e-27	-0.819741663107934	0.088	0.57	8.90330428107791e-23	4	Rarres2
Ogn.3	2.69048794291303e-26	-1.20366196787149	0.129	0.585	3.72632580093455e-22	4	Ogn
Cd200.3	4.56798251104672e-26	0.52770288380909	0.612	0.237	6.32665577779971e-22	4	Cd200
Mef2c	1.10213563538432e-25	0.467901052152321	0.415	0.116	1.52645785500728e-21	4	Mef2c
Ctla2a.3	1.52072636422544e-25	0.437427519800922	0.422	0.118	2.10620601445224e-21	4	Ctla2a
2810025M15Rik	4.63144056403536e-25	0.294409660765796	0.286	0.056	6.41454518118897e-21	4	2810025M15Rik
Clec14a.1	7.0582634512001e-25	0.339327307162932	0.34	0.079	9.77569487991214e-21	4	Clec14a
Jam2.1	2.26026914775874e-24	0.414986285835428	0.497	0.165	3.13047276964585e-20	4	Jam2
Tek.1	2.50442930363151e-24	0.331507593855208	0.395	0.105	3.46863458552964e-20	4	Tek
AW112010.2	3.50097395639458e-24	0.495621897506098	0.503	0.17	4.84884892960649e-20	4	AW112010
Fabp5.2	9.53002890926912e-24	0.435574953959964	0.408	0.111	1.31990900393377e-19	4	Fabp5
Igfbp7.3	1.12999508470765e-23	1.09928056988884	0.912	0.85	1.5650431923201e-19	4	Igfbp7
Cd63.2	2.82672503945743e-23	-0.70233119578223	0.129	0.551	3.91501417964854e-19	4	Cd63
Adam15	3.29017904979913e-23	0.353535661999594	0.408	0.121	4.55689798397179e-19	4	Adam15
Fxyd1.2	5.44792862011909e-23	-0.769688496399501	0.027	0.461	7.54538113886494e-19	4	Fxyd1
Pltp.2	9.05301641495738e-23	0.485213485974793	0.592	0.238	1.2538427734716e-18	4	Pltp
Nes.1	1.06549092380702e-22	0.311309932999696	0.293	0.063	1.47570492947273e-18	4	Nes
Fth1.3	1.38836688150064e-22	-0.58698119580276	0.939	0.98	1.92288813087839e-18	4	Fth1
Ecscr.1	1.41935873979799e-22	0.351070155772686	0.442	0.135	1.96581185462021e-18	4	Ecscr
Lpar6.1	3.24522973397139e-22	0.312736170826712	0.34	0.084	4.49464318155037e-18	4	Lpar6
She	7.04870924678318e-22	0.255613763395908	0.238	0.045	9.76246230679471e-18	4	She
Timp2.3	7.2236804007703e-22	-0.826096270384468	0.184	0.577	1.00047973550669e-17	4	Timp2
Fnbp1l.1	1.27706590274552e-21	0.34919847291993	0.32	0.079	1.76873627530255e-17	4	Fnbp1l
Fos.4	1.80442777764875e-21	-1.16376720087095	0.66	0.856	2.49913247204352e-17	4	Fos
Lrrc8c	2.39400723810946e-21	0.276556735789065	0.279	0.063	3.3157000247816e-17	4	Lrrc8c
Epas1.4	5.68220607546417e-21	0.381629291068249	0.463	0.159	7.86985541451787e-17	4	Epas1
Ppap2a	6.55349454288385e-21	0.401909696996527	0.347	0.098	9.07658994189413e-17	4	Ppap2a
Gpc3.3	6.78889006826837e-21	-1.31959825550335	0.116	0.5	9.40261274455169e-17	4	Gpc3
Cdh13	9.1096582948031e-21	0.257653284623152	0.279	0.063	1.26168767383023e-16	4	Cdh13
Fli1.1	1.86721620278999e-20	0.309124149500312	0.327	0.086	2.58609444086414e-16	4	Fli1
Tmem204	3.64346932838574e-20	0.297092906287952	0.286	0.069	5.04620501981425e-16	4	Tmem204
Mndal	5.15531753766372e-20	0.335562260319929	0.415	0.134	7.14011478966426e-16	4	Mndal
8430408G22Rik.4	1.10828009753909e-19	0.327762073915149	0.395	0.119	1.53496793509164e-15	4	8430408G22Rik
Fxyd5.2	1.37297246323979e-19	0.447125911568976	0.463	0.172	1.90156686158711e-15	4	Fxyd5
Rps21.3	1.80942450421304e-19	0.47877358797071	0.925	0.797	2.50605293833506e-15	4	Rps21
Mmp2.3	3.70200107428791e-19	-0.841228613305743	0.082	0.452	5.12727148788876e-15	4	Mmp2
Gng11.2	3.87167979043846e-19	0.542385485366357	0.626	0.306	5.36227650975726e-15	4	Gng11
Erg.1	1.04015534904793e-18	0.298783149004606	0.313	0.086	1.44061515843138e-14	4	Erg
Scarb1.3	1.61182348979706e-18	0.461116283906217	0.442	0.159	2.23237553336892e-14	4	Scarb1
S100a6.2	1.75048540757961e-18	-0.646976667135255	0.551	0.809	2.42442228949776e-14	4	S100a6
C1s.4	2.02058143086497e-18	-0.603160648005122	0.095	0.471	2.79850528174799e-14	4	C1s
BC028528	2.15203637406911e-18	0.292967062374394	0.265	0.066	2.98057037808571e-14	4	BC028528
Serpinf1.4	3.03592008337103e-18	-0.941013731815375	0.102	0.459	4.20474931546888e-14	4	Serpinf1
Abca8a.4	5.14727158851637e-18	-0.638770783325849	0.048	0.407	7.12897115009518e-14	4	Abca8a
Col6a1.4	5.38680467504114e-18	-0.620291224051012	0.041	0.403	7.46072447493198e-14	4	Col6a1
Ece1.1	5.85748339397359e-18	0.419149831622026	0.585	0.269	8.11261450065342e-14	4	Ece1
Sp100.1	5.98224432435025e-18	0.289645301808311	0.361	0.112	8.2854083892251e-14	4	Sp100
Aqp1.4	6.81725703114859e-18	0.658849502449019	0.374	0.121	9.4419009881408e-14	4	Aqp1
1810011O10Rik	9.0735228486386e-18	0.29055317293522	0.272	0.07	1.25668291453645e-13	4	1810011O10Rik
Tagln2.2	3.11757726093798e-17	0.362658286856603	0.565	0.248	4.3178445063991e-13	4	Tagln2
Cxx1a	3.95376049457523e-17	0.30679525264517	0.306	0.089	5.47595828498669e-13	4	Cxx1a
Mllt4	5.58876134862535e-17	0.26210104157207	0.327	0.099	7.7404344678461e-13	4	Mllt4
Aebp1.3	1.08159137225847e-16	-0.719422843280887	0.088	0.439	1.49800405057799e-12	4	Aebp1
Meg3.2	1.51100316510024e-16	-0.683082355015502	0.082	0.426	2.09273938366383e-12	4	Meg3
Myl12a.2	2.29726970255917e-16	0.451286653364727	0.755	0.497	3.18171853804445e-12	4	Myl12a
Apod.4	2.63348648236043e-16	-2.46731943086904	0.735	0.831	3.6473787780692e-12	4	Apod
Ehd4.3	2.95200717575053e-16	0.487111379882872	0.463	0.185	4.08852993841448e-12	4	Ehd4
Col5a2.3	3.3519482244325e-16	-0.589046363088907	0.075	0.42	4.64244829083902e-12	4	Col5a2
Slfn5.2	6.00896511056889e-16	0.367852671079888	0.429	0.166	8.32241667813792e-12	4	Slfn5
Pls3.1	7.38406466556776e-16	0.300821648210765	0.401	0.15	1.02269295618114e-11	4	Pls3
C130074G19Rik.4	9.10883870328658e-16	0.273109321316799	0.435	0.158	1.26157416040519e-11	4	C130074G19Rik
Rnase4.3	1.23002643710386e-15	-0.694609599702034	0.102	0.425	1.70358661538885e-11	4	Rnase4
Anp32a.1	1.51605886384402e-15	0.435241346978597	0.599	0.311	2.09974152642397e-11	4	Anp32a
Entpd2.4	1.66013643027028e-15	-0.518874693911279	0.034	0.357	2.29928895592434e-11	4	Entpd2
Psme1.1	1.89184415154784e-15	0.291985747561153	0.469	0.197	2.62020414989376e-11	4	Psme1
Smoc2.3	2.02368536701065e-15	-1.31391767530414	0.129	0.436	2.80280423330975e-11	4	Smoc2
Crispld2.3	3.4011133911028e-15	-0.830841222089945	0.02	0.335	4.71054204667738e-11	4	Crispld2
Cpe.3	3.73467018223803e-15	-0.566358957131165	0.088	0.411	5.17251820239967e-11	4	Cpe
Slc6a6	7.29439066737987e-15	0.362875696020674	0.272	0.082	1.01027310743211e-10	4	Slc6a6
Crim1.1	7.51554114763819e-15	0.253130854385913	0.347	0.118	1.04090244894789e-10	4	Crim1
Ndufa8	1.02452800029872e-14	0.336610994902742	0.422	0.172	1.41897128041373e-10	4	Ndufa8
Ecm1.4	1.1025335092958e-14	-0.650903456651266	0.082	0.391	1.52700891037468e-10	4	Ecm1
Myl12b.1	1.66358034033829e-14	0.385385718466175	0.68	0.39	2.30405877136853e-10	4	Myl12b
Arhgap31	1.81500213008524e-14	0.256959785600931	0.279	0.086	2.51377795016806e-10	4	Arhgap31
Cd2ap.1	1.95953530420411e-14	0.345949598392658	0.463	0.2	2.71395639632269e-10	4	Cd2ap
Atox1.2	2.38130935674523e-14	0.368207569362357	0.639	0.357	3.29811345909214e-10	4	Atox1
Igfbp6.3	2.96205947288862e-14	-1.31902978542806	0.184	0.477	4.10245236995074e-10	4	Igfbp6
Islr.3	4.95451626260369e-14	-0.466839607165985	0.027	0.325	6.86200502370611e-10	4	Islr
Sh3bgrl3	5.03211694749949e-14	0.251676181141877	0.442	0.181	6.96948197228679e-10	4	Sh3bgrl3
Rps11.3	5.37196739304701e-14	0.342159654911424	0.823	0.567	7.4401748393701e-10	4	Rps11
Malat1	5.40853114355474e-14	-0.526468276895972	1	0.993	7.49081563382331e-10	4	Malat1
Iigp1.1	5.64219693164212e-14	0.335463309005873	0.279	0.087	7.81444275032433e-10	4	Iigp1
Matn2.4	6.80272609041592e-14	-0.53641620572939	0.027	0.324	9.42177563522606e-10	4	Matn2
Pcolce.4	7.00957576912879e-14	-0.672147042185397	0.129	0.424	9.70826244024337e-10	4	Pcolce
Lum.4	7.03011921052852e-14	-1.44397524603249	0.272	0.544	9.736715106582e-10	4	Lum
Thbd.1	8.81022222833622e-14	0.391330400352331	0.429	0.18	1.22021577862457e-09	4	Thbd
Cmip	9.84495284508406e-14	0.25523490375887	0.347	0.127	1.36352596904414e-09	4	Cmip
Txnip.2	1.16908035194137e-13	0.297374120475254	0.66	0.352	1.61917628743879e-09	4	Txnip
Cpxm1.3	1.27984492445537e-13	-0.570622625390464	0.02	0.309	1.77258522037069e-09	4	Cpxm1
Lrp1.3	1.53652995899099e-13	-0.418970206272	0.027	0.317	2.12809399320252e-09	4	Lrp1
mt-Rnr2.1	1.54250212960871e-13	0.387354111617621	1	0.994	2.13636544950807e-09	4	mt-Rnr2
Igf2	1.59882085705131e-13	0.643095499332389	0.197	0.051	2.21436688701606e-09	4	Igf2
Cd302.4	1.76368333033623e-13	-0.449211832055008	0.041	0.334	2.44270141251568e-09	4	Cd302
Igfbp5.2	1.78567104247627e-13	-1.13629050677857	0.163	0.446	2.47315439382964e-09	4	Igfbp5
H2-T23	1.80733587174775e-13	0.3030891424069	0.435	0.193	2.50316018237064e-09	4	H2-T23
Fosb.4	2.5759435623023e-13	-0.983277734524855	0.32	0.584	3.56768183378868e-09	4	Fosb
Entpd1.1	2.70992975146847e-13	0.279093851171168	0.313	0.112	3.75325270578383e-09	4	Entpd1
Crip2.3	3.39220732439551e-13	0.390108038165256	0.585	0.324	4.69820714428778e-09	4	Crip2
Rcn3.3	3.67920715995215e-13	-0.483211209873271	0.136	0.433	5.09570191653373e-09	4	Rcn3
Kitl.2	4.76766566624989e-13	0.309575498458952	0.476	0.213	6.6032169477561e-09	4	Kitl
Pmp22.3	5.53319880749145e-13	-0.989559895087321	0.109	0.402	7.66348034837565e-09	4	Pmp22
Fstl1.3	7.4497457390383e-13	-0.644571157538293	0.265	0.543	1.0317897848568e-08	4	Fstl1
Tgfbi.3	8.76776962176544e-13	-0.593867468396192	0.027	0.302	1.21433609261451e-08	4	Tgfbi
Ptrf.1	9.88434381304034e-13	0.439230588395883	0.748	0.541	1.36898161810609e-08	4	Ptrf
C1ra.2	1.15924601701647e-12	-0.420895022946499	0.048	0.326	1.60555573356781e-08	4	C1ra
Col6a2.4	1.32319484144757e-12	-0.483079474923798	0.088	0.372	1.83262485540488e-08	4	Col6a2
Egr1.4	1.57842373222674e-12	-0.82427491856625	0.701	0.795	2.18611686913403e-08	4	Egr1
Ctsl.2	1.88934855344859e-12	-0.564653097671819	0.347	0.6	2.6167477465263e-08	4	Ctsl
Bnip2	1.99209045204765e-12	0.277314689350833	0.429	0.191	2.75904527608599e-08	4	Bnip2
Abi3bp.3	2.33898023647991e-12	-0.475091280042829	0.041	0.314	3.23948762752468e-08	4	Abi3bp
Tuba1a.3	3.74869491294565e-12	-0.524015927582372	0.265	0.525	5.19194245442972e-08	4	Tuba1a
Mfap5.3	4.16465061733967e-12	-0.590632545856618	0.054	0.328	5.76804110501544e-08	4	Mfap5
Ccl11.3	7.68111069056333e-12	-0.597227960937052	0.061	0.326	1.06383383064302e-07	4	Ccl11
Ybx1.1	8.07642591305606e-12	0.424749531556142	0.741	0.541	1.11858498895826e-07	4	Ybx1
Scd2.3	8.75044687443794e-12	-0.570142100006808	0.143	0.415	1.21193689210965e-07	4	Scd2
Nr2f2.3	1.06569824903974e-11	-0.399489471398801	0.048	0.323	1.47599207492004e-07	4	Nr2f2
Anxa1.1	1.25982388264347e-11	-0.451324601888856	0.122	0.395	1.7448560774612e-07	4	Anxa1
Cryab.4	1.44488137855989e-11	-0.59266086397051	0.027	0.282	2.00116070930545e-07	4	Cryab
Tcf4.4	1.59719250178038e-11	0.375658438560737	0.667	0.396	2.21211161496583e-07	4	Tcf4
Clec3b.3	1.8590651761967e-11	-0.732303121033471	0.034	0.29	2.57480526903242e-07	4	Clec3b
Lama2.2	1.98304512067217e-11	-0.395768635765981	0.02	0.274	2.74651749213096e-07	4	Lama2
Bgn.3	2.05428230091716e-11	-0.471125993091856	0.068	0.337	2.84518098677027e-07	4	Bgn
Cox5a	2.43075678766716e-11	0.325137279628663	0.388	0.177	3.36659815091902e-07	4	Cox5a
Col5a1.4	2.56549053557076e-11	-0.377227718397531	0.054	0.316	3.5532043917655e-07	4	Col5a1
Sult1a1	2.56827850454053e-11	0.370181058080055	0.327	0.134	3.55706572878864e-07	4	Sult1a1
Bicc1.3	2.64729061025866e-11	-0.335425505858512	0.007	0.249	3.66649749520824e-07	4	Bicc1
Rps14.3	2.6694453535552e-11	0.368459460362703	0.946	0.86	3.69718181467396e-07	4	Rps14
Ctnnb1.1	3.00746821637793e-11	0.265932680199594	0.49	0.243	4.16534347968343e-07	4	Ctnnb1
Col5a3.2	3.54811064889021e-11	-0.377767095201864	0.041	0.297	4.91413324871293e-07	4	Col5a3
Mt1	4.94275226329001e-11	-1.00697914272985	0.286	0.516	6.84571188465667e-07	4	Mt1
Gnai2.1	5.07784557979874e-11	0.326489366861879	0.619	0.371	7.03281612802126e-07	4	Gnai2
Scara5.4	5.67899880402308e-11	-0.405185583298518	0.034	0.279	7.86541334357197e-07	4	Scara5
Ddx5.1	5.82624192233267e-11	0.278083998184313	0.905	0.723	8.06934506243075e-07	4	Ddx5
Junb.4	6.17233484490223e-11	-0.701335302616808	0.687	0.788	8.54868376018959e-07	4	Junb
Cebpg	6.98961291317066e-11	0.302696982581665	0.32	0.131	9.68061388474137e-07	4	Cebpg
Aplp2.2	8.58570198585244e-11	0.364585498186179	0.68	0.446	1.18911972504056e-06	4	Aplp2
Cyb5r3	8.72422298114698e-11	0.317224841165895	0.531	0.296	1.20830488288886e-06	4	Cyb5r3
Sgk1	9.61696204981194e-11	0.27888909465676	0.347	0.144	1.33194924389895e-06	4	Sgk1
Mmp14.2	1.18835518344832e-10	-0.317227307332055	0.02	0.256	1.64587192907592e-06	4	Mmp14
Phlda1.2	1.30256542950497e-10	-0.546441010205125	0.048	0.292	1.80405311986438e-06	4	Phlda1
Dpep1.4	1.49931786516377e-10	-0.451552933924336	0.034	0.275	2.07655524325183e-06	4	Dpep1
Sparcl1.1	1.55376466513396e-10	0.257571821889499	0.966	0.811	2.15196406121053e-06	4	Sparcl1
Actb.2	1.613640493027e-10	0.290586787454515	1	0.968	2.2348920828424e-06	4	Actb
Id3.2	1.77127616737095e-10	0.274696393920339	0.633	0.373	2.45321749180876e-06	4	Id3
Vit.3	1.79481329427824e-10	-0.308059613034015	0.007	0.233	2.48581641257536e-06	4	Vit
Cytl1	1.81127365685819e-10	0.624084533857947	0.136	0.032	2.50861401474859e-06	4	Cytl1
Add3.2	1.89205691107217e-10	-0.363221384199486	0.075	0.331	2.62049882183496e-06	4	Add3
Uaca.1	1.89467261662241e-10	0.292369010865285	0.429	0.208	2.62412157402203e-06	4	Uaca
Nid1.4	2.2869986581525e-10	-0.4685513417128	0.156	0.415	3.16749314154122e-06	4	Nid1
Il33.3	2.42380152161118e-10	-0.378719709912415	0.014	0.242	3.35696510743148e-06	4	Il33
Zeb2.2	3.01859074805458e-10	-0.408870035004166	0.068	0.318	4.1807481860556e-06	4	Zeb2
Pdgfra.4	3.03191718281734e-10	-0.348737918380906	0.027	0.261	4.19920529820202e-06	4	Pdgfra
Atp1a2.3	3.18095014438478e-10	-0.490152092792656	0.027	0.257	4.40561594997292e-06	4	Atp1a2
Slc25a5	3.63157648645609e-10	0.262183706775161	0.449	0.228	5.02973343374168e-06	4	Slc25a5
Adamts2.2	4.36576196718295e-10	-0.32112020818085	0.014	0.235	6.04658032454839e-06	4	Adamts2
Sdc4.2	4.60722324133745e-10	-0.390273066869167	0.014	0.235	6.38100418925238e-06	4	Sdc4
Vim.1	4.85057278291489e-10	-0.308501725586651	0.687	0.878	6.71804330433713e-06	4	Vim
Msn.1	4.94245348650661e-10	0.302160516641263	0.469	0.252	6.84529807881166e-06	4	Msn
Scn7a.2	5.92252733545036e-10	-0.728576494969484	0.034	0.264	8.20270035959874e-06	4	Scn7a
Socs3.4	6.60609798559088e-10	-0.565146217752025	0.129	0.372	9.14944571004336e-06	4	Socs3
Eng.1	6.68235762096185e-10	0.262643789277138	0.34	0.152	9.25506530503216e-06	4	Eng
Actn4.4	7.40068852378863e-10	0.321682165046388	0.544	0.306	1.02499536054473e-05	4	Actn4
Srpx.2	1.00673777824291e-09	-0.270628597371661	0	0.207	1.39433182286643e-05	4	Srpx
Olfml3.3	1.08149427845577e-09	-0.31901529169499	0.007	0.217	1.49786957566124e-05	4	Olfml3
Serpinh1.4	1.22105077205576e-09	-0.440722178141939	0.388	0.6	1.69115531929723e-05	4	Serpinh1
Nupr1.3	1.45048637576036e-09	-0.345482559862104	0.034	0.258	2.0089236304281e-05	4	Nupr1
Jun.3	1.45487892538833e-09	-0.774867745762893	0.837	0.831	2.01500731166284e-05	4	Jun
Chchd2	1.66882605451584e-09	0.298066822484105	0.769	0.554	2.31132408550444e-05	4	Chchd2
Efemp1.3	1.82884648294582e-09	-0.308925897434698	0.027	0.245	2.53295237887995e-05	4	Efemp1
Ebf2.3	1.89900162100556e-09	-0.270648766591415	0.007	0.212	2.6301172450927e-05	4	Ebf2
Clic1	1.93948813057504e-09	0.258516284882048	0.483	0.264	2.68619106084643e-05	4	Clic1
Gpm6b.4	1.97799969147368e-09	-0.525987902092343	0.014	0.222	2.73952957269104e-05	4	Gpm6b
Abca9.3	2.07038200062566e-09	-0.309452403313168	0.007	0.214	2.86747907086654e-05	4	Abca9
Abca8b.3	2.20222925319735e-09	-0.298384794672452	0	0.201	3.05008751567832e-05	4	Abca8b
Tmem176b.1	2.23250316805763e-09	0.265003324363881	0.483	0.255	3.09201688775981e-05	4	Tmem176b
Lpar1.1	3.33493289739929e-09	-0.288281465242371	0.007	0.207	4.61888206289802e-05	4	Lpar1
Ctsb.3	3.50495352701443e-09	-0.46005140997358	0.361	0.556	4.85436063491499e-05	4	Ctsb
Dbi.4	3.73256074991331e-09	-0.751780763846396	0.293	0.515	5.16959663862994e-05	4	Dbi
Sat1.2	3.73482894722343e-09	-0.609239480128969	0.313	0.52	5.17273809190446e-05	4	Sat1
Col4a2.2	3.85219934285875e-09	0.321165466700604	0.476	0.272	5.33529608985936e-05	4	Col4a2
Ifitm3.2	4.30146517867538e-09	0.3450129687119	0.864	0.742	5.9575292724654e-05	4	Ifitm3
Thbs4.4	4.50424121412656e-09	-0.351961315705427	0.007	0.205	6.23837408156529e-05	4	Thbs4
Sdc2.3	4.54915214738278e-09	-0.297754471311667	0.048	0.266	6.30057572412515e-05	4	Sdc2
Cp.4	5.58103318954005e-09	-0.966756406069744	0.156	0.366	7.72973096751297e-05	4	Cp
Klf2.2	5.66833764940125e-09	0.366278772505431	0.633	0.428	7.85064764442074e-05	4	Klf2
Igfbp3.1	5.73445195247528e-09	0.275714389378738	0.184	0.059	7.94221595417826e-05	4	Igfbp3
Ctsk.1	6.49692415712771e-09	-0.260341322765718	0	0.191	8.99823995762187e-05	4	Ctsk
Cpxm2.3	9.41068541277267e-09	-0.331862304712752	0.014	0.208	0.000130337992966902	4	Cpxm2
Ifitm2.1	9.52697281535442e-09	0.281378616033798	0.816	0.612	0.000131948573492659	4	Ifitm2
Cd9.2	9.98446543603933e-09	-0.47672227546524	0.333	0.565	0.000138284846289145	4	Cd9
Sh3glb1	1.01369797781446e-08	0.278025674094612	0.476	0.266	0.000140397169927302	4	Sh3glb1
Fbn1.3	1.03649077383923e-08	-0.503202520671894	0.102	0.322	0.000143553972176733	4	Fbn1
Angptl7.4	1.15300119673029e-08	-1.02718877565065	0.034	0.233	0.000159690665747145	4	Angptl7
Clu.2	1.1957424898257e-08	0.60746100200103	0.347	0.179	0.000165610334840859	4	Clu
Hspa1a.4	1.26897915930774e-08	0.325214754789177	0.626	0.387	0.000175753613564122	4	Hspa1a
Col6a3.3	1.36198528079688e-08	-0.28870847176892	0.027	0.226	0.000188634961390368	4	Col6a3
Abca6.4	1.42917262416026e-08	-0.355469407395168	0.007	0.194	0.000197940408446195	4	Abca6
Mal.4	1.60145641447766e-08	-0.479834144707679	0.027	0.221	0.000221801713405156	4	Mal
Rplp2.3	1.71610281727928e-08	0.281298167746038	0.871	0.748	0.00023768024019318	4	Rplp2
Atp5j	1.90125710066729e-08	0.256828365763003	0.578	0.35	0.00026332410844242	4	Atp5j
Plcb4.1	2.17128393223643e-08	0.268965096570773	0.395	0.203	0.000300722824614745	4	Plcb4
Prrx1.3	2.44932142634991e-08	-0.346005390128458	0.041	0.238	0.000339231017549462	4	Prrx1
Htra1.3	2.61838111634912e-08	-0.349321047245495	0.129	0.352	0.000362645784614353	4	Htra1
Ndrg2.2	2.72770291650312e-08	-0.276937015602473	0.02	0.208	0.000377786853935682	4	Ndrg2
Cd81.1	2.92257804918511e-08	0.306626496787284	0.837	0.677	0.000404777059812138	4	Cd81
Sema3b.2	2.94181806058276e-08	-0.267719431453735	0.014	0.198	0.000407441801390713	4	Sema3b
Tpm3.1	2.99078729145467e-08	0.296375670274027	0.537	0.334	0.000414224039866472	4	Tpm3
Pamr1.2	3.37585693461392e-08	-0.259341253712093	0.014	0.198	0.000467556185444027	4	Pamr1
Nr4a1.3	3.75744819102883e-08	-0.567873966027606	0.218	0.415	0.000520406574457493	4	Nr4a1
Hspa5.3	4.72584296923075e-08	-0.45905412456238	0.592	0.705	0.000654529251238459	4	Hspa5
Celf2.2	4.95615584872898e-08	-0.286111909042007	0.048	0.24	0.000686427585048963	4	Celf2
Fn1.3	5.17314414786819e-08	-0.657805986214037	0.211	0.409	0.000716480464479744	4	Fn1
Arhgap29	5.29976849499838e-08	0.312885171282267	0.367	0.194	0.000734017936557276	4	Arhgap29
Rps15.3	6.13145093131288e-08	0.262548993561833	0.878	0.746	0.000849205953986833	4	Rps15
Hmgcs1.2	6.50042390255804e-08	-0.318735668077107	0.027	0.214	0.000900308710504288	4	Hmgcs1
Enpp2.4	6.66909664840269e-08	-0.433160044845972	0.048	0.235	0.000923669885803773	4	Enpp2
Maf.2	7.20562223519384e-08	-0.305576341581326	0.034	0.219	0.000997978679574347	4	Maf
Lamc1.2	8.78610025363742e-08	-0.292148874064673	0.109	0.315	0.00121687488512878	4	Lamc1
Rps3.3	9.02963506865857e-08	0.271281647310353	0.844	0.711	0.00125060445700921	4	Rps3
Errfi1.3	9.10849367599575e-08	-0.508271546196209	0.095	0.29	0.00126152637412541	4	Errfi1
Serinc3.1	9.23996830816086e-08	0.261653905438265	0.537	0.337	0.00127973561068028	4	Serinc3
Fam46a.1	9.46728330555502e-08	-0.269775354999077	0	0.165	0.00131121873781937	4	Fam46a
Ptn.4	1.16771347833507e-07	-0.531310027460627	0.034	0.214	0.00161728316749408	4	Ptn
Rpl18a.1	1.20751109269733e-07	0.272389024589399	0.558	0.374	0.00167240286338581	4	Rpl18a
Zfp36.2	1.45814205900387e-07	-0.662557857735187	0.639	0.712	0.00201952675172036	4	Zfp36
Plekha4.3	1.60797740246467e-07	-0.333433206771054	0	0.16	0.00222704870241356	4	Plekha4
Oaz2	1.6822149165184e-07	0.250953387986372	0.313	0.155	0.00232986765937798	4	Oaz2
Atf3.2	1.71164584581088e-07	-0.749610873404087	0.156	0.348	0.00237062949644807	4	Atf3
Il11ra1.3	1.73480542018166e-07	-0.37846179968719	0.075	0.263	0.0024027055069516	4	Il11ra1
Lgi4.3	2.18265660991748e-07	-0.404550345743693	0.02	0.189	0.00302297940473571	4	Lgi4
Cox6a1	2.2323428253315e-07	0.251789666957505	0.687	0.497	0.00309179481308413	4	Cox6a1
Mbp.4	2.40025915164417e-07	-0.954381767989345	0.048	0.221	0.00332435892502718	4	Mbp
Vkorc1.1	2.50467355007943e-07	-0.278581505786661	0.102	0.293	0.00346897286686001	4	Vkorc1
Cygb.3	2.7171068333093e-07	-0.302596762383051	0.041	0.215	0.00376319296413338	4	Cygb
Mt2.2	2.84003889011324e-07	-0.543076848498247	0.102	0.291	0.00393345386280683	4	Mt2
Col4a1.1	3.27801943196152e-07	0.335058682867923	0.537	0.353	0.00454005691326671	4	Col4a1
Cebpb.1	3.48365018572745e-07	-0.335364429696519	0.054	0.231	0.00482485550723252	4	Cebpb
Vimp.2	4.17183352594971e-07	-0.26690440843798	0.075	0.257	0.00577798943344034	4	Vimp
Aspn.4	4.62456418564528e-07	-0.399498032419617	0.041	0.213	0.00640502139711871	4	Aspn
Shfm1	5.03097096402871e-07	0.252783459951521	0.605	0.419	0.00696789478517976	4	Shfm1
Plp1.4	6.16185642148854e-07	-1.19385553838213	0.068	0.236	0.00853417114376163	4	Plp1
Wdr89.2	6.46387889927668e-07	0.273384222264548	0.714	0.563	0.0089524722754982	4	Wdr89
Jund.1	7.35364072441424e-07	-0.328871904184848	0.497	0.672	0.0101847924033137	4	Jund
Thbs1.2	8.21582568777754e-07	-0.284529115623821	0.007	0.155	0.0113789185775719	4	Thbs1
Zbtb20.1	8.70904741921468e-07	-0.384244267900895	0.313	0.5	0.0120620306756123	4	Zbtb20
Sparc.2	9.97582573449243e-07	-0.50930396821493	0.973	0.984	0.013816518642272	4	Sparc
Dpt.4	1.00932908888448e-06	-0.664290537433726	0.054	0.218	0.01397920788105	4	Dpt
Serpine2.2	1.26034062094287e-06	-0.26307254266167	0.054	0.225	0.0174557176000587	4	Serpine2
S1pr3.1	1.43719533367084e-06	-0.26249324956989	0	0.139	0.0199051553713412	4	S1pr3
Gatm.4	2.23272690098037e-06	-0.361878200653018	0.014	0.155	0.0309232675785781	4	Gatm
Hspa1b.3	3.16868499988325e-06	0.266765927543698	0.456	0.273	0.043886287248383	4	Hspa1b
Apoe.2	3.24888989686215e-06	-0.800914169969961	0.605	0.703	0.0449971250715408	4	Apoe
Fgl2.1	3.31243515709088e-06	-0.29476542547711	0.027	0.173	0.0458772269257087	4	Fgl2
Ccdc80.4	3.67766366921402e-06	-0.436487938762484	0.068	0.226	0.0509356418186141	4	Ccdc80
Sfrp4.4	3.81027890859735e-06	-0.799597097015466	0.041	0.191	0.0527723628840734	4	Sfrp4
Myoc.4	4.00350209834981e-06	-0.39803680388485	0.02	0.16	0.0554485040621448	4	Myoc
Postn.2	5.60192828013454e-06	-0.360452577631352	0.041	0.187	0.0775867066798634	4	Postn
Chrdl1.3	5.92807555078832e-06	-0.294498782984449	0.027	0.166	0.0821038463784183	4	Chrdl1
Pcolce2.4	6.30282897656301e-06	-0.339709027214322	0.02	0.155	0.0872941813253976	4	Pcolce2
Gstm1.2	6.83692587714819e-06	-0.292952188352929	0.204	0.381	0.0946914233985024	4	Gstm1
Cadm4.4	6.98418385490986e-06	-0.31671049969215	0.014	0.144	0.0967309463905016	4	Cadm4
Marcks.2	7.19490101012064e-06	-0.329743844663427	0.442	0.612	0.0996493789901709	4	Marcks
Igf1.3	7.79403638306194e-06	-0.374819127441312	0.109	0.269	0.107947403905408	4	Igf1
C3.3	9.10414594556949e-06	-0.496150185663864	0.061	0.208	0.126092421346137	4	C3
Gas1.4	1.0677165613675e-05	-0.300922667473595	0.041	0.182	0.147878743749398	4	Gas1
Nfkbiz.2	1.1924766342327e-05	-0.356889085086512	0.109	0.266	0.165158013841229	4	Nfkbiz
Btg2.2	1.24572342085719e-05	-0.442574032709176	0.32	0.481	0.172532693788721	4	Btg2
Angptl1.2	2.47849100712403e-05	-0.289817035736652	0.034	0.163	0.343271004486678	4	Angptl1
Klf6.2	2.78953489432222e-05	-0.474829623230409	0.435	0.56	0.386350582863627	4	Klf6
Col14a1.3	3.00014824849375e-05	-0.264169385249165	0.027	0.151	0.415520532416384	4	Col14a1
Ank3.3	4.03579546641386e-05	-0.28383635494492	0.027	0.148	0.55895767209832	4	Ank3
Cxcl1.3	5.95057913336442e-05	-0.630827500078577	0.088	0.216	0.824155209970973	4	Cxcl1
Cfh.3	6.2754192172968e-05	-0.41099061923481	0.048	0.174	0.869145561595607	4	Cfh
Sfrp2.4	6.36154888720933e-05	-0.534048561567705	0.02	0.132	0.881074520878492	4	Sfrp2
Cnp.4	6.67254748191239e-05	-0.3857144602495	0.061	0.185	0.924147826244866	4	Cnp
Kcna1.4	6.80572606733577e-05	-0.359876277939571	0.034	0.151	0.942593060326004	4	Kcna1
Igfbp4.4	7.77044989551208e-05	-0.377949908009805	0.293	0.442	1	4	Igfbp4
Sostdc1.4	8.0180119782605e-05	-0.336192711811566	0.02	0.129	1	4	Sostdc1
Trf.3	0.000108480038770306	-0.276893300710988	0.02	0.127	1	4	Trf
Itm2a.3	0.00021952866898663	-0.298356769573171	0.238	0.381	1	4	Itm2a
Spock2.2	0.00024486864853227	-0.256378288581436	0.02	0.118	1	4	Spock2
Sfrp1.4	0.000316119393543982	-0.312891573844461	0.048	0.154	1	4	Sfrp1
Mpz.4	0.000360903272625149	-1.61314719852321	0.102	0.216	1	4	Mpz
Sfrp5.3	0.000536945890661697	-0.577813814524445	0.027	0.119	1	4	Sfrp5
Fbln1.4	0.000789384138594836	-0.275180317741839	0.061	0.161	1	4	Fbln1
Tpm2.4	0.00128362160540325	-0.594600671228642	0.054	0.148	1	4	Tpm2
Inmt.4	0.00132426995604739	-0.475139300403471	0.027	0.11	1	4	Inmt
Col15a1.3	0.00170740221546074	-0.459947326392246	0.279	0.369	1	4	Col15a1
Ppap2b.2	0.00180340518828511	0.487124809341285	0.626	0.623	1	4	Ppap2b
Mylk.2	0.00200788943307309	-0.321976646066932	0.109	0.207	1	4	Mylk
Dnajb1.3	0.00221795181106462	-0.413001745499037	0.224	0.328	1	4	Dnajb1
Zfp36l1.1	0.0032560695684663	-0.258169634406959	0.395	0.5	1	4	Zfp36l1
Pi16.4	0.00351443704396464	-0.583737948019535	0.061	0.143	1	4	Pi16
Myh11.4	0.00432006540857136	-0.526375032855351	0.034	0.105	1	4	Myh11
Ier2.3	0.00540700060112951	-0.404299209531693	0.585	0.624	1	4	Ier2
Ubc.2	0.00556249698355133	-0.29211169305779	0.707	0.724	1	4	Ubc
Myl9.1	0.00666178175250705	-0.595286765992009	0.177	0.263	1	4	Myl9
Selp	1.42071515281963e-242	1.07469372425123	0.736	0.013	1.96769048665518e-238	5	Selp
Lrg1.2	1.03691766079914e-226	1.59362998849943	0.912	0.045	1.4361309602068e-222	5	Lrg1
Darc	3.638161588127e-214	1.2944692433683	0.76	0.024	5.0388537995559e-210	5	Darc
Plvap.5	2.2076133333109e-185	1.66445291267481	0.96	0.078	3.0575444666356e-181	5	Plvap
Aqp1.5	1.45530136569218e-182	1.8886364529219	0.96	0.084	2.01559239148367e-178	5	Aqp1
Tmem252	5.77747015107761e-164	1.19267469722323	0.656	0.028	8.00179615924249e-160	5	Tmem252
Sele	4.18701588063429e-143	0.870000428951981	0.416	0.005	5.79901699467849e-139	5	Sele
Ehd4.4	1.79123309599376e-116	1.37517474623793	0.92	0.157	2.48085783795135e-112	5	Ehd4
Chp2	1.20271726642882e-113	0.764414793476144	0.664	0.057	1.66576341400391e-109	5	Chp2
Rasa4	3.17014101527455e-113	0.643271934230853	0.576	0.038	4.39064530615526e-109	5	Rasa4
Rnd1	2.46118443053427e-107	0.640203250575515	0.464	0.022	3.40874043628996e-103	5	Rnd1
Cd36.5	4.26791744950437e-107	1.08235085287956	0.888	0.12	5.91106566756356e-103	5	Cd36
Vwf.1	2.79021684512861e-101	0.828660599667624	0.672	0.069	3.86445033050312e-97	5	Vwf
Pecam1.5	4.41135632900186e-99	0.969960003453737	0.92	0.154	6.10972851566758e-95	5	Pecam1
C1qtnf9.1	1.1510165786745e-96	0.719099597264101	0.68	0.073	1.59415796146418e-92	5	C1qtnf9
Ier3.4	2.30277828780227e-89	1.66423529911899	0.896	0.211	3.18934792860614e-85	5	Ier3
Ptgs1	4.38322564141192e-89	0.423365641863538	0.416	0.022	6.07076751335551e-85	5	Ptgs1
2200002D01Rik	4.67814820544439e-88	0.395519390164805	0.44	0.027	6.47923526454048e-84	5	2200002D01Rik
Cysltr1	1.54712384402913e-86	0.344817441206742	0.312	0.009	2.14276652398034e-82	5	Cysltr1
Fabp4.5	3.40018834966645e-86	1.98992854000059	1	0.341	4.70926086428804e-82	5	Fabp4
Cyp4b1	1.49666057132396e-84	0.561055184983611	0.528	0.046	2.07287489128368e-80	5	Cyp4b1
Ptprb.5	1.84581058770607e-77	0.960636886217996	0.808	0.151	2.5564476639729e-73	5	Ptprb
Grrp1	5.69500606112234e-76	0.518138293227821	0.512	0.05	7.88758339465444e-72	5	Grrp1
Icam1	7.99296740127665e-76	0.570422278547233	0.536	0.059	1.10702598507682e-71	5	Icam1
Tes	3.9681444194205e-75	0.381908928185192	0.4	0.027	5.4958800208974e-71	5	Tes
Emcn.5	2.37955754717347e-71	0.671303903680992	0.736	0.126	3.29568720283525e-67	5	Emcn
Tagln.3	3.32280737384353e-69	0.863831787375488	0.784	0.146	4.60208821277328e-65	5	Tagln
Mmrn2.3	9.83992174915582e-69	0.626206145895592	0.68	0.11	1.36282916225808e-64	5	Mmrn2
8430408G22Rik.5	1.70497598805062e-68	0.995829344901996	0.648	0.105	2.3613917434501e-64	5	8430408G22Rik
Egfl7.5	3.07960436079582e-68	0.944740152974589	0.896	0.209	4.26525203970221e-64	5	Egfl7
Csf2rb2	3.65761646797194e-68	0.391365822353652	0.384	0.029	5.06579880814113e-64	5	Csf2rb2
Myh9.3	4.22898712833992e-66	0.76614070459787	0.84	0.202	5.85714717275079e-62	5	Myh9
Pgm5	2.82301506524089e-65	0.348213390238245	0.296	0.015	3.90987586535864e-61	5	Pgm5
Cd14	3.08829017504226e-63	0.537291704271813	0.296	0.016	4.27728189243353e-59	5	Cd14
Gpr116.5	6.42246983308635e-63	0.796850436985774	0.832	0.182	8.8951207188246e-59	5	Gpr116
Pim3.1	6.51893880038387e-63	0.736822405708145	0.648	0.118	9.02873023853166e-59	5	Pim3
Eng.2	2.90453480998872e-61	0.571406323049218	0.696	0.13	4.02278071183437e-57	5	Eng
Pde2a	5.88832646408454e-61	0.418387825624246	0.456	0.051	8.15533215275708e-57	5	Pde2a
Hspb1.5	7.87319131560952e-61	1.05647231725653	0.912	0.277	1.09043699721192e-56	5	Hspb1
Ctla2a.4	6.23879144743612e-60	0.658871317646989	0.632	0.107	8.64072615469902e-56	5	Ctla2a
Fabp5.3	2.74078825386466e-59	0.622152836072596	0.608	0.101	3.79599173160255e-55	5	Fabp5
Sdpr.5	5.11569318916262e-59	0.949238596582852	0.896	0.25	7.08523506699023e-55	5	Sdpr
Slfn5.3	5.80597194203033e-59	0.747837569524981	0.704	0.15	8.041271139712e-55	5	Slfn5
Pdlim1	1.03497150648802e-58	0.526082521890429	0.552	0.083	1.4334355364859e-54	5	Pdlim1
Mall	7.21801143858005e-58	0.28132516990993	0.32	0.023	9.99694584243338e-54	5	Mall
Ecscr.2	5.43487248479354e-56	0.547205612402358	0.656	0.124	7.52729839143906e-52	5	Ecscr
Esam.5	6.88703509186597e-55	0.644163822080218	0.8	0.183	9.53854360223437e-51	5	Esam
Csf2rb	3.01310884445553e-54	0.43672734932386	0.36	0.034	4.17315574957091e-50	5	Csf2rb
Pdia5	7.92040672341486e-54	0.494619826833586	0.512	0.079	1.09697633119296e-49	5	Pdia5
Dusp2	2.21249494956369e-52	0.313994770404381	0.216	0.009	3.06430550514572e-48	5	Dusp2
Cdh5.4	5.14007802657823e-52	0.548014159750707	0.68	0.142	7.11900806681085e-48	5	Cdh5
Fam43a	2.44424416554205e-51	0.537081580508143	0.448	0.062	3.38527816927573e-47	5	Fam43a
Ints3	1.20695480421525e-50	0.321147697120837	0.352	0.035	1.67163240383813e-46	5	Ints3
Nuak1	1.60148260867947e-50	0.424115516367571	0.384	0.044	2.21805341302106e-46	5	Nuak1
Rasip1.2	4.2590510654057e-50	0.434710927082039	0.488	0.075	5.89878572558689e-46	5	Rasip1
Iigp1.2	7.39856676857061e-50	0.509804532857003	0.488	0.075	1.02470149744703e-45	5	Iigp1
Tmsb4x.4	1.20147680122063e-49	1.10852483763305	0.976	0.84	1.66404536969057e-45	5	Tmsb4x
Apold1.2	3.10342554931761e-48	0.774467223323528	0.464	0.071	4.29824438580489e-44	5	Apold1
Fgl2.2	5.39314057869573e-48	0.650655694703358	0.616	0.131	7.46949970149358e-44	5	Fgl2
Il6st	1.52347552749342e-47	0.845703941462205	0.808	0.303	2.11001360557839e-43	5	Il6st
Cd93.2	1.64047705812568e-47	0.50109744545031	0.56	0.104	2.27206072550406e-43	5	Cd93
Spint2	3.73167603687606e-47	0.321682409358509	0.376	0.045	5.16837131107334e-43	5	Spint2
Prcp	4.12671329021177e-47	0.290335202149029	0.304	0.028	5.7154979069433e-43	5	Prcp
Nfkbia.3	9.28791882854997e-46	1.19654419144917	0.848	0.363	1.28637675775417e-41	5	Nfkbia
Scarb1.4	2.28304673605499e-44	0.540920605194665	0.656	0.147	3.16201972943616e-40	5	Scarb1
S1pr1.3	2.68393014735844e-43	0.453288545350293	0.544	0.104	3.71724325409144e-39	5	S1pr1
Nt5e	9.73782856650043e-43	0.352906104415103	0.376	0.051	1.34868925646031e-38	5	Nt5e
Myct1.2	6.52779319264731e-41	0.398203022287677	0.408	0.063	9.04099357181653e-37	5	Myct1
Slfn2	6.73240537559493e-41	0.294207862020975	0.216	0.014	9.32438144519898e-37	5	Slfn2
[truncated: 3,277 more rows]
