# Supplementary material for: Single Cell Transcriptome Data Analysis Defines the Heterogeneity of Peripheral Nerve Cells in Homeostasis and Regeneration
Source: Front Cell Neurosci. 2021 Mar 22;15:624826. doi: 10.3389/fncel.2021.624826 (PMC8019921; doi:10.3389/fncel.2021.624826)
Supplement: Supplementary file 7 [file Data_Sheet_3.CSV]

	p_val	avg_logFC	pct.1	pct.2	p_val_adj	cluster	gene
Lox	2.33663111394524e-99	0.980038694848968	0.668	0.206	3.62154456350372e-95	0	Lox
Col1a2	8.17694801196442e-83	0.778412802429835	0.996	0.887	1.26734517237437e-78	0	Col1a2
Postn	8.85356504128466e-79	1.06588983983043	0.811	0.455	1.37221404574871e-74	0	Postn
Grb10	5.6345511987678e-77	0.562552431160296	0.571	0.171	8.73299090297021e-73	0	Grb10
Loxl2	3.88414814289878e-76	0.682762247468936	0.683	0.261	6.02004120667881e-72	0	Loxl2
Col12a1	1.28288294525574e-74	0.537900189404057	0.399	0.072	1.98834027685187e-70	0	Col12a1
Cthrc1	7.38369632899009e-71	0.734703278535386	0.752	0.348	1.14439909403017e-66	0	Cthrc1
Igfbp3	1.3149364459408e-70	0.704808156287438	0.479	0.125	2.03801999756365e-66	0	Igfbp3
Col1a1	1.85586641986604e-70	0.712440411068378	0.983	0.868	2.87640736415037e-66	0	Col1a1
Cald1	1.08373085465201e-69	0.429152684345546	0.916	0.533	1.67967445162515e-65	0	Cald1
Serpinh1	1.36234070786487e-67	0.544189191490522	0.979	0.717	2.11149186311976e-63	0	Serpinh1
Col5a2	4.31901024599159e-67	0.64197130651664	0.895	0.618	6.69403398026237e-63	0	Col5a2
Thbs2	1.96346896342987e-66	0.612467835483453	0.584	0.205	3.04318054641995e-62	0	Thbs2
Fstl1	8.76175471031968e-66	0.594591343930474	0.985	0.804	1.35798436255245e-61	0	Fstl1
Prrx1	4.79616050591783e-65	0.532614273023918	0.639	0.232	7.43356916812204e-61	0	Prrx1
Bgn	3.37390261614173e-63	0.504037584498758	0.924	0.629	5.22921166475807e-59	0	Bgn
Lgals1	7.06456857230389e-62	0.559592094813882	0.992	0.906	1.09493748302138e-57	0	Lgals1
H19	4.17299775950315e-61	1.32061811318463	0.536	0.197	6.46772922745393e-57	0	H19
Tnc	4.95403996590879e-58	0.831930212792746	0.435	0.126	7.67826654316204e-54	0	Tnc
S100a6	5.12884738141836e-57	0.582760451149031	0.989	0.964	7.94920055646031e-53	0	S100a6
Csrp2	2.66045790465233e-56	0.520309322520373	0.513	0.179	4.12344370642064e-52	0	Csrp2
RP23-103I12.13	5.84580542666563e-56	0.5003335059823	0.557	0.214	9.06041383078906e-52	0	RP23-103I12.13
Actn1	6.36653722263509e-54	0.383638572714887	0.511	0.172	9.86749604136213e-50	0	Actn1
Col3a1	5.30283703435701e-53	0.459989439018918	1	0.902	8.21886711954993e-49	0	Col3a1
Vcan	2.54006003726924e-52	0.464096680405726	0.567	0.224	3.93683905176359e-48	0	Vcan
Meg3	4.02119286925001e-51	0.815165008569738	0.851	0.606	6.23244682805059e-47	0	Meg3
Penk	6.77025757984976e-50	0.615457776141817	0.363	0.096	1.04932222230091e-45	0	Penk
Dpysl3	1.2066698640081e-46	0.377704633690175	0.529	0.203	1.87021762222615e-42	0	Dpysl3
Lrrc17	3.53038360528497e-46	0.33465155990374	0.393	0.115	5.47174154983117e-42	0	Lrrc17
P4hb	8.60225561266764e-46	0.419499095314358	0.882	0.589	1.33326359740736e-41	0	P4hb
H2-D1	1.49039132282792e-45	-0.807740560739526	0.498	0.742	2.30995751125099e-41	0	H2-D1
Plod2	1.70067854568038e-43	0.335405724480443	0.382	0.116	2.63588167795002e-39	0	Plod2
Rcn3	5.2884357780924e-42	0.378232263225317	0.706	0.372	8.19654661246541e-38	0	Rcn3
Aspn	5.82293734967933e-41	0.638635688806803	0.483	0.201	9.02497059826799e-37	0	Aspn
Mmp14	1.01456382717426e-40	0.423676388879908	0.695	0.368	1.57247247573739e-36	0	Mmp14
Tpm1	2.47565308854838e-40	0.307419656136196	0.849	0.56	3.83701472194113e-36	0	Tpm1
Col5a1	3.42965052737848e-40	0.442826809554234	0.683	0.361	5.3156153523839e-36	0	Col5a1
Rbp1	4.40026102209417e-40	0.405272965086333	0.523	0.225	6.81996455814376e-36	0	Rbp1
Inhba	5.14364096583655e-40	0.255747807455166	0.204	0.031	7.97212913295008e-36	0	Inhba
Col5a3	1.33140313964334e-39	0.543163865859836	0.542	0.259	2.06354172613322e-35	0	Col5a3
Ckap4	1.48552877270305e-39	0.44158063004334	0.66	0.362	2.30242104481246e-35	0	Ckap4
Cst3	2.1054770097839e-39	-0.693786672147969	0.641	0.837	3.26327881746407e-35	0	Cst3
Nfix	1.73349065704463e-38	0.338708173234333	0.494	0.199	2.68673716935348e-34	0	Nfix
Dnm3os	1.78785010978843e-38	0.260632796787743	0.214	0.038	2.77098888516109e-34	0	Dnm3os
Rrbp1	4.14604600866689e-38	0.375741844542005	0.939	0.742	6.42595670883281e-34	0	Rrbp1
Lsp1	1.48917476541435e-37	0.445066084979912	0.603	0.284	2.30807196891569e-33	0	Lsp1
Fbn1	2.08245143040413e-37	0.391833148856192	0.866	0.619	3.22759147198337e-33	0	Fbn1
Mfap5	2.88372091803732e-37	0.35829346944581	0.668	0.338	4.46947905086604e-33	0	Mfap5
Angptl1	2.38179711075142e-36	0.340731511238789	0.292	0.077	3.69154734195363e-32	0	Angptl1
Apoe	4.36403473876013e-36	-1.56396089221341	0.41	0.67	6.76381744160433e-32	0	Apoe
Npm1	1.21162996160801e-35	0.459708642190945	0.718	0.467	1.87790527749626e-31	0	Npm1
Plagl1	8.26615354314452e-35	0.359434340493549	0.246	0.06	1.28117113765197e-30	0	Plagl1
Maged1	5.45866762362063e-33	0.29952998558432	0.542	0.26	8.46038894984962e-29	0	Maged1
Col6a3	1.22639003380215e-32	0.318484664908794	0.742	0.427	1.90078191338995e-28	0	Col6a3
B2m	1.54786117128242e-32	-0.614672291939089	0.84	0.924	2.39903002937062e-28	0	B2m
S100a11	2.69710809404643e-32	0.351602009787538	0.901	0.754	4.18024783496256e-28	0	S100a11
Pmepa1	3.7263187378639e-31	0.361801337324159	0.431	0.183	5.77542141181527e-27	0	Pmepa1
Hsp90b1	6.4223156886968e-31	0.388451715253499	0.975	0.91	9.95394708591116e-27	0	Hsp90b1
Srgn	8.26606474571579e-31	-0.646241096475837	0.036	0.291	1.28115737493849e-26	0	Srgn
Pdia3	9.20062737823471e-31	0.315942139571944	0.884	0.656	1.4260052373526e-26	0	Pdia3
Serpine1	1.33962293206145e-30	0.394301486861435	0.298	0.097	2.07628158240204e-26	0	Serpine1
Dlk1	3.00835264170335e-30	0.397926081461777	0.145	0.021	4.66264575937602e-26	0	Dlk1
Tgfb3	3.40356661524204e-30	0.26852264137826	0.237	0.063	5.27518789696364e-26	0	Tgfb3
C1qtnf3	3.7036046550965e-30	0.265864620304003	0.13	0.015	5.74021685493407e-26	0	C1qtnf3
Sec61b	4.74353449348176e-29	0.338513998438662	0.649	0.381	7.35200411144738e-25	0	Sec61b
Pdia6	3.56101586552375e-28	0.305574772564958	0.733	0.459	5.51921848997526e-24	0	Pdia6
Kdelr2	3.58609750762525e-28	0.287149859353078	0.559	0.296	5.55809252706837e-24	0	Kdelr2
Gpx3	8.18793861422477e-28	0.281534149973467	0.401	0.164	1.2690486058187e-23	0	Gpx3
Lmna	3.96914957775907e-27	0.344424697145067	0.685	0.439	6.15178493056878e-23	0	Lmna
Tmsb4x	4.14584386924995e-26	-0.618370510462455	0.979	0.981	6.42564341295049e-22	0	Tmsb4x
Aplp2	1.0672774011311e-25	-0.376655726155789	0.109	0.352	1.65417324401309e-21	0	Aplp2
Slc25a4	3.22609911712341e-25	0.272841430188856	0.826	0.595	5.00013102162957e-21	0	Slc25a4
Anxa2	5.15217830319033e-25	0.362031755170132	0.929	0.847	7.9853611521147e-21	0	Anxa2
Tyrobp	6.18363755544968e-25	-0.523758947838158	0.021	0.225	9.58401984719146e-21	0	Tyrobp
Eef1b2	1.98200986906469e-24	0.253784672549169	0.945	0.846	3.07191709606336e-20	0	Eef1b2
Apod	2.25851594622784e-24	-1.72194206793402	0.903	0.948	3.50047386505853e-20	0	Apod
Wbp5	2.79308798556104e-24	0.304367332655436	0.571	0.331	4.32900706882106e-20	0	Wbp5
Sparc	3.4217741165474e-24	0.276326274029521	1	0.937	5.30340770323682e-20	0	Sparc
Mif	3.62047080508296e-24	0.353140030712647	0.424	0.213	5.61136770079807e-20	0	Mif
Rcn1	4.07091235833435e-24	0.276532493376071	0.521	0.28	6.30950706418241e-20	0	Rcn1
Ctss	4.83674966730533e-24	-0.920038778329392	0.023	0.22	7.49647830935654e-20	0	Ctss
Tubb5	5.00978257704943e-24	0.304228970130947	0.58	0.336	7.76466201616891e-20	0	Tubb5
Rpl41	5.04097946665375e-24	0.269426178223952	0.962	0.964	7.81301407536664e-20	0	Rpl41
Fth1	4.99566235408117e-23	-0.461940935270049	0.973	0.989	7.74277708259041e-19	0	Fth1
Hmgn1	7.9833808359663e-23	0.272622461636672	0.532	0.297	1.23734419576642e-18	0	Hmgn1
Sfr1	9.65475640021532e-23	0.271071472570423	0.536	0.295	1.49639069446937e-18	0	Sfr1
Olfml3	1.20356609885175e-22	0.296428579871635	0.466	0.246	1.86540709661033e-18	0	Olfml3
Nedd4	1.51930318634238e-22	0.255577908824495	0.878	0.671	2.35476800851205e-18	0	Nedd4
Gm10320	2.99965472352037e-22	0.259438507519249	0.529	0.299	4.64916485598422e-18	0	Gm10320
H2-K1	3.9786662373425e-22	-0.508726987109069	0.464	0.627	6.16653480125713e-18	0	H2-K1
Tmsb10	5.53101574284234e-22	0.298940950495495	0.882	0.811	8.57252129983134e-18	0	Tmsb10
Gda	9.08316592315027e-22	-0.381875897847072	0.08	0.285	1.40779988642906e-17	0	Gda
Txnip	1.56585646907822e-21	-0.344726087967432	0.086	0.293	2.42692094142433e-17	0	Txnip
Gnas	1.69812249341642e-21	0.410751150685225	0.945	0.871	2.63192005254611e-17	0	Gnas
Sepp1	2.32610271186124e-21	-0.462919399291061	0.334	0.555	3.60522659311374e-17	0	Sepp1
Sat1	3.2127419296208e-21	-0.388934281384051	0.141	0.356	4.97942871671928e-17	0	Sat1
Cyr61	6.63032515420269e-21	0.367124359813073	0.456	0.246	1.02763409564988e-16	0	Cyr61
Ctsb	1.00568175051499e-20	-0.644293991008099	0.842	0.893	1.55870614512318e-16	0	Ctsb
Laptm5	1.07807439288801e-20	-0.404793471514143	0.017	0.189	1.67090750153713e-16	0	Laptm5
Col14a1	2.01019242753604e-20	0.269563606933026	0.542	0.295	3.1155972434381e-16	0	Col14a1
Cilp	3.48966399086947e-20	0.290751381028499	0.256	0.096	5.4086302194486e-16	0	Cilp
Timp3	7.97905278059837e-20	-0.530032519381414	0.237	0.443	1.23667339046494e-15	0	Timp3
Cdkn1c	1.79518354256039e-19	0.340862826505885	0.216	0.076	2.78235497261435e-15	0	Cdkn1c
Ramp2	2.02048520087821e-19	-0.299858352012897	0.046	0.226	3.13155001284114e-15	0	Ramp2
Cd36	2.51653001188161e-19	-0.560578091253037	0.027	0.195	3.9003698654153e-15	0	Cd36
Trf	2.77695886195763e-19	-0.807735208437634	0.082	0.264	4.30400854014813e-15	0	Trf
Fcer1g	1.38110663800948e-18	-0.40138951259616	0.034	0.199	2.14057717825089e-14	0	Fcer1g
Ncl	7.97890955810229e-18	0.325573429837594	0.845	0.669	1.23665119241027e-13	0	Ncl
Calr	1.29451131546123e-17	0.270110711455527	0.918	0.818	2.00636308783335e-13	0	Calr
Itm2b	5.11824623307014e-17	-0.31086218051619	0.729	0.832	7.93276983663541e-13	0	Itm2b
Oaf	5.25658330004841e-17	0.277094549717368	0.414	0.228	8.14717845674503e-13	0	Oaf
Cd52	7.29435227741259e-17	-0.394468549761152	0.015	0.157	1.13055165947618e-12	0	Cd52
Cybb	1.4104159886243e-16	-0.453333663665433	0.021	0.165	2.18600374076881e-12	0	Cybb
Cd74	1.76553443563525e-16	-1.31550500512566	0.038	0.188	2.73640182179107e-12	0	Cd74
Ccl9	2.05223657724875e-16	-0.447578022324679	0.074	0.235	3.18076147107784e-12	0	Ccl9
Tnfaip6	2.83080835663934e-16	0.29217414675345	0.288	0.137	4.38746987195531e-12	0	Tnfaip6
Psap	2.9335880867094e-16	-0.613052572506817	0.433	0.582	4.54676817559089e-12	0	Psap
Ccl6	4.3259330092949e-16	-0.568717739596775	0.027	0.17	6.70476357110616e-12	0	Ccl6
Cd93	4.34319729701264e-16	-0.260030212402762	0.017	0.156	6.73152149063989e-12	0	Cd93
Coro1a	6.03297347989831e-16	-0.268371334563222	0.008	0.14	9.3505055964944e-12	0	Coro1a
Lyz2	6.36751304865417e-16	-1.59082937534716	0.197	0.356	9.86900847410909e-12	0	Lyz2
Mest	9.32701352547339e-16	0.408090152919021	0.244	0.108	1.44559382631312e-11	0	Mest
Sfrp1	9.90923568321555e-16	0.293421329390538	0.256	0.113	1.53583243854158e-11	0	Sfrp1
Ptprc	9.9293319475799e-16	-0.295383981843894	0.004	0.13	1.53894715855541e-11	0	Ptprc
mt-Rnr1	1.89527397247405e-15	0.465543339284482	0.655	0.5	2.93748512993753e-11	0	mt-Rnr1
Ehd4	1.95047261701515e-15	-0.400830936617606	0.065	0.218	3.02303750911178e-11	0	Ehd4
Dusp6	1.95695602180761e-15	-0.271815560878952	0.055	0.207	3.03308613819962e-11	0	Dusp6
Mpeg1	3.28217159701746e-15	-0.402681788537611	0.034	0.173	5.08703775821736e-11	0	Mpeg1
Serpine2	4.2276155935804e-15	-0.515263848190656	0.113	0.275	6.55238140849027e-11	0	Serpine2
Gsn	4.667214397841e-15	-0.91563572045167	0.624	0.733	7.23371559521377e-11	0	Gsn
Gpr116	7.67143322568452e-15	-0.337356019268221	0.021	0.153	1.18899543564884e-10	0	Gpr116
H2-Aa	9.61088217598636e-15	-0.893330496415078	0.019	0.148	1.48959062845613e-10	0	H2-Aa
Top2a	1.48247681000102e-14	0.264078887075751	0.168	0.059	2.29769080782057e-10	0	Top2a
Ccr2	1.83813986602142e-14	-0.508459392780472	0.015	0.138	2.8489329783466e-10	0	Ccr2
Col15a1	2.10400263314275e-14	-0.390203732224164	0.149	0.313	3.26099368110795e-10	0	Col15a1
Mgll	2.40099962283787e-14	-0.279313822781264	0.029	0.163	3.72130931543642e-10	0	Mgll
Eif5a	4.62394320720341e-14	0.260829428389074	0.517	0.355	7.16664957684456e-10	0	Eif5a
Ctgf	5.43766529892918e-14	0.303568157025613	0.294	0.15	8.42783744681034e-10	0	Ctgf
Col4a1	1.14590309440641e-13	-0.324876833860062	0.244	0.413	1.77603520602049e-09	0	Col4a1
Cd14	1.29697960251825e-13	-0.367386484721101	0.021	0.143	2.01018868594303e-09	0	Cd14
Cp	1.38186654996656e-13	-0.59513657030004	0.099	0.247	2.14175496579317e-09	0	Cp
Col4a2	2.73388961806252e-13	-0.297326532375275	0.168	0.334	4.2372555190351e-09	0	Col4a2
Cpe	6.12573733974084e-13	-0.299555477733693	0.116	0.264	9.49428030286432e-09	0	Cpe
Flt1	7.19465281474909e-13	-0.276257929771867	0.006	0.112	1.11509923975796e-08	0	Flt1
Mcl1	1.21624837433013e-12	-0.327577789183342	0.218	0.375	1.88506335537427e-08	0	Mcl1
Smc4	1.51436872443734e-12	0.251656367077194	0.357	0.207	2.34712008600544e-08	0	Smc4
Ccl11	1.78971007048221e-12	-0.407400555857555	0.134	0.281	2.77387163824037e-08	0	Ccl11
Sparcl1	1.93970809157421e-12	-0.566464027478286	0.38	0.52	3.00635357113087e-08	0	Sparcl1
Pecam1	2.12451617243218e-12	-0.302567646544703	0.019	0.129	3.29278761565263e-08	0	Pecam1
Gatm	2.43280486667303e-12	-0.267967646393963	0.023	0.137	3.77060426285654e-08	0	Gatm
Plvap	3.15052658075067e-12	-0.42920161871077	0.029	0.144	4.88300114750546e-08	0	Plvap
Fxyd5	3.35334055312638e-12	-0.326137835986518	0.197	0.345	5.19734252329058e-08	0	Fxyd5
Rgs2	3.50418898456968e-12	-0.305017656634081	0.053	0.179	5.43114250718455e-08	0	Rgs2
Cyba	7.85301241287184e-12	-0.375743974293622	0.195	0.333	1.21713839387101e-07	0	Cyba
H2-Ab1	1.0142068448753e-11	-0.843928086507239	0.036	0.149	1.57191918887222e-07	0	H2-Ab1
Abca8a	2.95629046433304e-11	-0.252755529173552	0.103	0.237	4.58195459066978e-07	0	Abca8a
Wfdc17	7.72186618792434e-11	-0.331830384710733	0.021	0.12	1.19681204046639e-06	0	Wfdc17
Igf1	1.1133817996296e-10	0.389469520770626	0.586	0.459	1.72563045124592e-06	0	Igf1
Pla2g7	1.52769422758222e-10	-0.251821049861709	0.021	0.117	2.36777328332968e-06	0	Pla2g7
Ctla2a	1.58231303617103e-10	-0.535055583509614	0.078	0.197	2.45242697476148e-06	0	Ctla2a
S100a4	1.60204954853877e-10	0.280739745614253	0.479	0.32	2.48301659528025e-06	0	S100a4
Serinc3	2.0079087667454e-10	-0.262554226255183	0.246	0.381	3.1120577975787e-06	0	Serinc3
Zfp36	2.12669740400948e-10	-0.431971053142156	0.296	0.422	3.29616830647429e-06	0	Zfp36
Hspa5	3.69281946117235e-10	0.275709724234486	0.905	0.859	5.72350088287102e-06	0	Hspa5
Wif1	1.65875231398035e-09	-0.269139429008647	0.046	0.145	2.57090021143814e-05	0	Wif1
Fabp4	1.73914490488289e-09	-1.39041207742469	0.185	0.295	2.695500688078e-05	0	Fabp4
Ctsd	2.53844594863343e-09	-0.672312073840608	0.29	0.41	3.93433737578696e-05	0	Ctsd
Cebpb	2.723475356577e-09	-0.415875321142952	0.17	0.287	4.22111445515869e-05	0	Cebpb
Zeb2	4.57358183297615e-09	-0.280011015583307	0.212	0.334	7.08859448292974e-05	0	Zeb2
Mylk	7.10103348591287e-09	-0.265046494782695	0.04	0.134	0.000110058917998164	0	Mylk
Gpnmb	1.17540509283897e-08	-0.46158399343405	0.044	0.136	0.000182176035339112	0	Gpnmb
Pi16	1.19325242433938e-08	-0.526570443295406	0.128	0.238	0.00018494219324836	0	Pi16
Lrg1	1.37492307755422e-08	-0.385600693299221	0.04	0.129	0.000213099327790128	0	Lrg1
Fos	1.38104677625729e-08	-0.398372099388306	0.672	0.748	0.000214048439852118	0	Fos
Junb	2.18395166805414e-08	-0.390068010038786	0.447	0.538	0.000338490669031712	0	Junb
Neat1	3.0265476970945e-08	-0.258595759415112	0.223	0.337	0.000469084627572676	0	Neat1
Egfl7	5.24693151413226e-08	-0.308545530086691	0.059	0.148	0.00081322191537536	0	Egfl7
Dcn	1.13778908193446e-07	-0.281520309968553	0.996	0.83	0.00176345929809021	0	Dcn
Cxcl1	7.62411798997096e-07	0.321149315199211	0.263	0.17	0.011816620472656	0	Cxcl1
Tcf4	4.9634207760951e-06	-0.266410417945357	0.296	0.372	0.076928058608698	0	Tcf4
Gpx1	1.7521795220846e-05	-0.314349880234476	0.67	0.684	0.271570304127892	0	Gpx1
Spp1	2.1137359342674e-05	-0.718297796878314	0.548	0.622	0.327607932452105	0	Spp1
Cxcl2	3.33256233280706e-05	-0.860862279293611	0.088	0.157	0.516513835961767	0	Cxcl2
Lgmn	3.62810915248987e-05	-0.357469473049567	0.254	0.323	0.562320637544405	0	Lgmn
Dusp1	3.68471700962069e-05	-0.466498173592371	0.387	0.434	0.571094289321111	0	Dusp1
C3	4.21825317285512e-05	-0.543526760692198	0.242	0.315	0.653787059260815	0	C3
Tm4sf1	0.000115652244667695	-0.262922718227071	0.25	0.321	1	0	Tm4sf1
Klf2	0.000133683852636913	-0.297807782946412	0.223	0.291	1	0	Klf2
Clec3b	0.000147609856922529	-0.426755257701664	0.185	0.246	1	0	Clec3b
Sdpr	0.000169061943613844	-0.372001891916234	0.12	0.179	1	0	Sdpr
Tgfbi	0.00189272160960274	-0.427149931404359	0.418	0.432	1	0	Tgfbi
Lpl	0.00194608807079396	-0.339569682126835	0.2	0.262	1	0	Lpl
Cxcl14	0.00957900595401761	-0.333675930455393	0.126	0.168	1	0	Cxcl14
Ctss.1	0	2.00015253545331	0.887	0.044	0	1	Ctss
Cybb.1	6.91288822730628e-262	1.30086060180084	0.701	0.027	1.0714285463502e-257	1	Cybb
Lyz2.1	7.61675267598858e-260	2.9726450230959	0.966	0.201	1.18052049725147e-255	1	Lyz2
Ccl6.1	5.70509786256033e-243	1.50508304814295	0.692	0.036	8.84233117718225e-239	1	Ccl6
Mpeg1.1	4.14028058203353e-235	1.16092949903664	0.692	0.04	6.41702087409378e-231	1	Mpeg1
Laptm5.1	1.15545447738256e-203	0.987256035484603	0.681	0.052	1.79083889449523e-199	1	Laptm5
Fcer1g.1	1.78891841303929e-201	1.01058988606528	0.703	0.062	2.77264464836959e-197	1	Fcer1g
Tyrobp.1	4.82446014638979e-196	1.08553807564933	0.734	0.077	7.47743078088954e-192	1	Tyrobp
Apobec1	7.61402578339745e-155	0.651168164111832	0.441	0.017	1.18009785616877e-150	1	Apobec1
Sparc.1	1.76668895271662e-150	-1.92729886640139	0.757	0.987	2.73819120781548e-146	1	Sparc
Fcgr3	7.56659494565123e-149	0.512825491108079	0.398	0.01	1.17274655062648e-144	1	Fcgr3
Pla2g7.1	8.81777813400055e-135	0.76509755626618	0.449	0.03	1.36666743298874e-130	1	Pla2g7
Cd74.1	2.43200298568112e-134	1.62905080902641	0.579	0.076	3.76936142750717e-130	1	Cd74
Trem2	6.17283312590731e-134	0.55568346658009	0.347	0.007	9.56727406184374e-130	1	Trem2
Cyth4	7.5307362500727e-132	0.542421729941401	0.415	0.022	1.16718881139877e-127	1	Cyth4
Ccr2.1	2.82181158143255e-129	1.22794314730425	0.475	0.043	4.37352577006231e-125	1	Ccr2
Cd68	9.52087873961331e-128	0.560057041753674	0.356	0.011	1.47564099585267e-123	1	Cd68
Alox5ap	7.64942228939664e-126	0.589055640805267	0.415	0.025	1.18558396063358e-121	1	Alox5ap
Ms4a6c	1.6192812815721e-123	0.658214733364468	0.37	0.017	2.5097240583086e-119	1	Ms4a6c
Csf1r	2.62086104905013e-123	0.497187056644685	0.333	0.009	4.06207253992279e-119	1	Csf1r
Ly86	1.96041388328324e-122	0.570574575661896	0.328	0.008	3.0384454777007e-118	1	Ly86
Lilrb4	3.07666675806749e-122	0.598299799334668	0.452	0.037	4.76852580832881e-118	1	Lilrb4
C3ar1	2.11111211645728e-121	0.466623807967242	0.325	0.008	3.27201266929714e-117	1	C3ar1
Apoe.1	5.1261523420349e-121	2.56186668422004	0.898	0.56	7.94502351491988e-117	1	Apoe
F13a1	2.88393376386119e-116	0.536148523661122	0.302	0.006	4.46980894060846e-112	1	F13a1
Mafb	5.99558897590629e-114	0.765199008643655	0.458	0.05	9.29256335375716e-110	1	Mafb
Aif1	6.07313107754935e-114	0.55105552511258	0.336	0.014	9.41274585709374e-110	1	Aif1
Pld4	2.49308711951109e-112	0.495811761674845	0.35	0.018	3.86403572653024e-108	1	Pld4
Itgam	3.69127177795444e-109	0.702688789280488	0.492	0.066	5.72110212865158e-105	1	Itgam
Wfdc17.1	1.39033384957355e-107	0.809796034088666	0.415	0.039	2.15487843345404e-103	1	Wfdc17
Msr1	5.22679867655508e-107	0.498646495197967	0.308	0.011	8.10101526879272e-103	1	Msr1
H2-Aa.1	2.74748781346809e-106	1.24159296135934	0.463	0.055	4.25833136209419e-102	1	H2-Aa
Ctsc	3.57801201490036e-105	0.691675829649636	0.412	0.042	5.54556082189407e-101	1	Ctsc
Lcp1	2.45882263412886e-104	0.593028753479772	0.449	0.052	3.81092920063632e-100	1	Lcp1
Psap.1	3.66215283309927e-104	1.40885746392009	0.862	0.491	5.67597067602056e-100	1	Psap
Plin2	2.72380993191627e-102	0.819880153155292	0.531	0.099	4.22163301347703e-98	1	Plin2
Ncf1	1.97879732024064e-101	0.550462828148841	0.356	0.025	3.06693796664097e-97	1	Ncf1
Ms4a7	4.40640857285325e-100	0.486554536988803	0.254	0.004	6.82949264706526e-96	1	Ms4a7
Col1a2.1	4.36692772721886e-96	-1.9877864873139	0.782	0.934	6.76830128441651e-92	1	Col1a2
Sirpa	6.15156627024258e-96	0.646860838110276	0.469	0.073	9.53431256224897e-92	1	Sirpa
Cd53	9.04575216026585e-96	0.534550514429005	0.41	0.045	1.4020011273196e-91	1	Cd53
Mrc1	2.1096581884969e-95	0.516420604051657	0.271	0.009	3.26975922635134e-91	1	Mrc1
Apoc2	6.05465998780233e-95	0.42249889801812	0.251	0.005	9.38411751509484e-91	1	Apoc2
H2-Ab1.1	6.35441654661195e-94	1.21121309608799	0.449	0.063	9.84871020559387e-90	1	H2-Ab1
Pf4	1.07592550044391e-92	0.98836751158862	0.322	0.023	1.66757693313801e-88	1	Pf4
Cd84	5.73703774589761e-92	0.388219165891416	0.305	0.018	8.8918348023667e-88	1	Cd84
Plek	5.61255497191303e-91	0.51041500066028	0.387	0.042	8.698898950968e-87	1	Plek
Fyb	1.03151537460558e-90	0.650971941193618	0.438	0.063	1.59874567910119e-86	1	Fyb
Gpx1.1	1.30943743149304e-90	1.04134964898895	0.904	0.639	2.02949707507106e-86	1	Gpx1
Cebpb.1	2.515039238858e-90	0.917804982409471	0.647	0.19	3.89805931630601e-86	1	Cebpb
Gp49a	1.62190921768947e-89	0.469331737775147	0.333	0.027	2.51379709649691e-85	1	Gp49a
Cyba.1	7.04892755710588e-88	0.940061758656715	0.669	0.234	1.09251328207584e-83	1	Cyba
Lyz1	2.66903847979769e-87	0.415899395509545	0.232	0.005	4.13674273983844e-83	1	Lyz1
Slfn2	1.09283797488604e-86	0.564190073433077	0.415	0.057	1.69378957727587e-82	1	Slfn2
C1qc	7.58337202945117e-84	0.489478127111088	0.251	0.011	1.17534683084464e-79	1	C1qc
Pirb	1.8943704369379e-83	0.404401123586792	0.28	0.017	2.93608474021005e-79	1	Pirb
C1qb	2.57291700457904e-83	0.668403722926523	0.254	0.012	3.98776406539705e-79	1	C1qb
Cd14.1	2.87335814052216e-83	0.577663155320619	0.421	0.06	4.4534177819953e-79	1	Cd14
Coro1a.1	3.61163852883627e-83	0.521526979531431	0.412	0.055	5.59767855584333e-79	1	Coro1a
Lat2	1.57643514072186e-82	0.405512746993754	0.288	0.02	2.44331682460482e-78	1	Lat2
Cfp	9.82202048330001e-82	0.432168717453437	0.311	0.027	1.52231495470667e-77	1	Cfp
Unc93b1	1.52602936759401e-81	0.577191054555934	0.452	0.081	2.36519291683395e-77	1	Unc93b1
Cd52.1	2.44619990455731e-81	0.550227631849946	0.444	0.067	3.79136523207337e-77	1	Cd52
Clec4a2	2.81749652530422e-81	0.345449946847028	0.215	0.004	4.36683786456901e-77	1	Clec4a2
Lgmn.1	3.63491874727482e-81	1.09455878585879	0.644	0.245	5.63376056640125e-77	1	Lgmn
AI662270	7.7625377363414e-81	0.344943217648739	0.266	0.015	1.20311572375555e-76	1	AI662270
Fstl1.1	1.51652162059836e-79	-1.33114476952551	0.681	0.873	2.35045685976541e-75	1	Fstl1
C1qa	4.05623481739442e-79	0.628076628764622	0.251	0.013	6.28675834347961e-75	1	C1qa
Clec4a3	3.48979485809333e-78	0.344406839483116	0.237	0.01	5.40883305055885e-74	1	Clec4a3
Clec4a1	8.6970051866264e-78	0.278652354963436	0.198	0.003	1.34794883387523e-73	1	Clec4a1
Cxcl2.1	1.53071737696884e-77	1.0641336163582	0.446	0.085	2.372458862564e-73	1	Cxcl2
Mcl1.1	8.14256157758066e-77	0.754206673847498	0.689	0.276	1.26201561890923e-72	1	Mcl1
Ms4a6d	1.07856649106708e-76	0.312929349402875	0.229	0.009	1.67167020450487e-72	1	Ms4a6d
Serpinh1.1	1.80122436580309e-76	-0.817076510733887	0.446	0.834	2.79171764455821e-72	1	Serpinh1
Spi1	6.17222444540177e-76	0.351558642212413	0.254	0.015	9.5663306679282e-72	1	Spi1
Col3a1.1	6.6938163780285e-76	-1.79673434681304	0.864	0.934	1.03747460043064e-71	1	Col3a1
Itgb2	3.45819746002025e-75	0.493100188149623	0.342	0.042	5.35986024328539e-71	1	Itgb2
Tmsb4x.1	3.17427285883185e-74	0.710424720327382	1	0.977	4.91980550390349e-70	1	Tmsb4x
Ptprc.1	4.59656134160912e-74	0.46065501949252	0.379	0.052	7.12421042335998e-70	1	Ptprc
AF251705	2.95027483129952e-73	0.295912489544506	0.226	0.01	4.57263096103113e-69	1	AF251705
Cd300a	7.06721104524762e-73	0.28754861433675	0.24	0.013	1.09534703990293e-68	1	Cd300a
Cx3cr1	1.53505102871283e-71	0.361434851106977	0.203	0.006	2.37917558940201e-67	1	Cx3cr1
Cotl1	2.68692317764967e-71	0.608360668100889	0.506	0.127	4.16446223303923e-67	1	Cotl1
Ncf4	5.36469235483319e-71	0.297295020569535	0.257	0.019	8.31473668075596e-67	1	Ncf4
Fcgr2b	2.19240773893653e-70	0.403797169399708	0.234	0.014	3.39801275457773e-66	1	Fcgr2b
Nedd4.1	3.278147775444e-70	-0.645258558598671	0.325	0.789	5.08080123716066e-66	1	Nedd4
Nckap1l	2.16366414223916e-69	0.270302189704427	0.24	0.015	3.35346305405647e-65	1	Nckap1l
Arg1	2.76081866852955e-69	0.762210419718007	0.277	0.027	4.27899285435395e-65	1	Arg1
Slc15a3	6.83494640168053e-69	0.338013408262659	0.234	0.014	1.05934834279647e-64	1	Slc15a3
Ctsd.1	9.99441291930041e-68	1.63938946919186	0.675	0.33	1.54903405836237e-63	1	Ctsd
C5ar1	1.1814561732005e-67	0.355726138140217	0.246	0.018	1.83113892284345e-63	1	C5ar1
Col1a1.1	3.49352683604791e-67	-1.51896192955872	0.811	0.908	5.41461724319065e-63	1	Col1a1
Bcl2a1b	7.29379140272346e-66	0.330360407869131	0.226	0.014	1.13046472950811e-61	1	Bcl2a1b
Igfbp7	1.50057073807668e-65	-1.33230373882557	0.715	0.878	2.32573458694505e-61	1	Igfbp7
Lgals3	1.67200238657179e-65	1.13918884696757	0.647	0.279	2.59143649894762e-61	1	Lgals3
Rgs2.1	5.22633943931049e-65	0.629940475561088	0.444	0.097	8.10030349698733e-61	1	Rgs2
Hal	8.85607632986427e-65	0.350058591861343	0.195	0.008	1.37260327036566e-60	1	Hal
Clec12a	3.39494275727926e-63	0.297026276041969	0.186	0.007	5.26182177950713e-59	1	Clec12a
Cxcr4	8.70718033932769e-63	0.333540136709734	0.26	0.026	1.3495258807924e-58	1	Cxcr4
Ptpn6	1.57645554972111e-61	0.341147536773138	0.299	0.039	2.44334845651275e-57	1	Ptpn6
Ptafr	1.826651031329e-61	0.336715372558678	0.234	0.019	2.83112643345682e-57	1	Ptafr
Dcn.1	3.43137160628738e-61	-1.72542936635036	0.814	0.875	5.31828285258481e-57	1	Dcn
Csf2ra	5.43950569822707e-61	0.350663184396336	0.291	0.037	8.43068988168214e-57	1	Csf2ra
Cald1.1	1.11765396044701e-60	-0.862715136592467	0.237	0.686	1.73225187329682e-56	1	Cald1
Actb	5.49995144224493e-60	0.587569373473976	1	0.99	8.52437474033542e-56	1	Actb
Fcgr1	1.42773001181562e-59	0.262014914652362	0.161	0.004	2.21283874531303e-55	1	Fcgr1
Ncf2	1.96675529051723e-58	0.259176395891314	0.198	0.012	3.04827402477266e-54	1	Ncf2
Ptrf	7.23666295969515e-58	-0.670783898788701	0.319	0.739	1.12161039212315e-53	1	Ptrf
Tpd52	9.40585746905079e-57	0.34222711716649	0.288	0.04	1.45781384912818e-52	1	Tpd52
Emr1	4.90991396919651e-56	0.25788233319056	0.184	0.01	7.60987566085767e-52	1	Emr1
H2-D1.1	5.49652151520689e-56	0.633554432912226	0.929	0.645	8.51905869641916e-52	1	H2-D1
Gm2a	6.33595378696509e-56	0.482926002975342	0.415	0.102	9.8200947744172e-52	1	Gm2a
Aebp1	7.05588243662299e-56	-0.811327313542628	0.381	0.75	1.0935912188522e-51	1	Aebp1
Rgs1	6.6317080802405e-55	0.466465605838485	0.249	0.029	1.02784843535647e-50	1	Rgs1
Ccrl2	3.31620268643227e-54	0.410772445708737	0.291	0.044	5.13978254370137e-50	1	Ccrl2
Col5a2.1	4.07651443417506e-54	-0.798848979303013	0.364	0.736	6.31818972152792e-50	1	Col5a2
Adam8	9.30254380745114e-54	0.280804101092067	0.206	0.017	1.44180126471685e-49	1	Adam8
Cebpa	2.25148967646359e-52	0.370538188339116	0.282	0.045	3.48958384955091e-48	1	Cebpa
H2-Eb1	4.84902405763408e-52	0.668588063466662	0.26	0.035	7.51550238692705e-48	1	H2-Eb1
Hcls1	5.87111189638451e-52	0.31219690356854	0.266	0.037	9.09963632820635e-48	1	Hcls1
Ctsa	1.92218115717167e-51	0.631078727784058	0.48	0.166	2.97918857550036e-47	1	Ctsa
Fth1.1	4.39850263530138e-51	0.967844183986545	0.997	0.983	6.81723923445361e-47	1	Fth1
Ctsb.1	6.43605397461027e-51	1.1351330022172	0.949	0.87	9.97524005524845e-47	1	Ctsb
Clec10a	1.51560744253146e-50	0.302629532001917	0.161	0.008	2.34903997517951e-46	1	Clec10a
4632428N05Rik	2.37385832100266e-50	0.356522025743623	0.282	0.047	3.67924301172202e-46	1	4632428N05Rik
Nid1	2.8110938408515e-50	-0.665427897435616	0.189	0.62	4.35691434393574e-46	1	Nid1
F7	3.34139610689197e-50	0.283425644443158	0.147	0.005	5.17882982607186e-46	1	F7
H2-DMb1	3.71868804899874e-50	0.329526593118559	0.209	0.021	5.76359460714314e-46	1	H2-DMb1
Lst1	7.4429186839751e-50	0.385919561322447	0.274	0.043	1.1535779668293e-45	1	Lst1
Meg3.1	1.1962958246915e-49	-0.99545398677885	0.384	0.71	1.85413889868936e-45	1	Meg3
Ccl9.1	6.89125694732816e-49	0.641994661246546	0.475	0.149	1.06807591426639e-44	1	Ccl9
Gnas.1	3.52713568234652e-48	-0.766160314820384	0.743	0.914	5.46670759406887e-44	1	Gnas
Col6a1	4.68136086621097e-48	-0.665566622552021	0.15	0.568	7.25564120654039e-44	1	Col6a1
F10	1.33847739083389e-47	0.267488263605105	0.138	0.005	2.07450610805344e-43	1	F10
Gpnmb.1	1.92549951619849e-47	1.20354595634942	0.328	0.076	2.98433170015605e-43	1	Gpnmb
Fam49b	3.49528881257946e-47	0.421002593014177	0.311	0.064	5.41734813061691e-43	1	Fam49b
Fermt3	3.95975079517646e-47	0.258184571434954	0.192	0.018	6.13721775744399e-43	1	Fermt3
Ms4a6b	1.37842539947771e-46	0.289552865898886	0.184	0.016	2.1364215266505e-42	1	Ms4a6b
Efhd2	1.59169488236637e-46	0.414427647818793	0.379	0.101	2.46696789817963e-42	1	Efhd2
Cd81	6.95698433448176e-46	-0.520982923507009	0.088	0.507	1.07826300200133e-41	1	Cd81
Dusp1.1	1.56615564302765e-45	0.93370533795404	0.65	0.381	2.42738463112855e-41	1	Dusp1
Tpm1.1	1.82172794200055e-45	-0.812781505065729	0.325	0.678	2.82349613730665e-41	1	Tpm1
Col6a3.1	2.33089899489774e-45	-0.609782345192455	0.138	0.562	3.612660352192e-41	1	Col6a3
Fbln2	1.06443927620197e-44	-0.712880154034388	0.071	0.477	1.64977443418543e-40	1	Fbln2
Arrb2	1.27697163959291e-44	0.319783693896967	0.268	0.048	1.97917834420505e-40	1	Arrb2
Fam105a	2.04415418537938e-44	0.278757095795436	0.209	0.026	3.1682345719195e-40	1	Fam105a
Ctsz	2.73426671468412e-44	0.607128086714311	0.537	0.241	4.23783998108892e-40	1	Ctsz
Zeb2.1	6.4652799166394e-44	0.593331483478343	0.573	0.258	1.00205373427994e-39	1	Zeb2
Slc11a1	1.01322995619216e-43	0.264031118015528	0.229	0.032	1.57040510910223e-39	1	Slc11a1
Atp2b1	1.01793139145461e-43	0.64469879148833	0.607	0.298	1.5776918636155e-39	1	Atp2b1
Rcn3.1	3.9993013548947e-43	-0.589475164089224	0.105	0.507	6.19851716995129e-39	1	Rcn3
Igfbp4	4.36110076411894e-43	-0.843111222220301	0.508	0.771	6.75927007430795e-39	1	Igfbp4
Ogn	6.51687162989537e-43	-0.870233275682436	0.082	0.468	1.01004993391748e-38	1	Ogn
Srgn.1	1.5419114684307e-42	0.415218352300528	0.517	0.183	2.38980858492074e-38	1	Srgn
Ifi30	1.56381347875723e-42	0.382564275486522	0.316	0.074	2.42375451072582e-38	1	Ifi30
Hmox1	2.33794615186826e-42	0.424050321788633	0.218	0.031	3.62358274078062e-38	1	Hmox1
Col6a2	3.70660540641663e-42	-0.596560626425573	0.15	0.544	5.74486771940514e-38	1	Col6a2
Pcolce	4.77753550893276e-42	-0.641483153799763	0.121	0.51	7.40470228529488e-38	1	Pcolce
Fos.1	9.66649358471776e-42	0.743268247718231	0.901	0.7	1.49820984069541e-37	1	Fos
Nfib	1.5910350822726e-41	-0.596331949104786	0.04	0.427	2.4659452740143e-37	1	Nfib
Col5a1.1	2.21007519475102e-41	-0.588446621956894	0.102	0.492	3.4253955443446e-37	1	Col5a1
Ppic	4.10003598708706e-41	-0.47439382258336	0.048	0.438	6.35464577638623e-37	1	Ppic
Arhgap30	5.63473772443818e-41	0.259411726545399	0.215	0.03	8.73327999910674e-37	1	Arhgap30
Clec4d	7.81143032852514e-41	0.313399567245061	0.186	0.021	1.21069358661811e-36	1	Clec4d
Prkcd	1.71627274564844e-40	0.385828475856891	0.308	0.075	2.66005112848052e-36	1	Prkcd
Serpinf1	2.46554877593853e-40	-0.621709630964384	0.068	0.445	3.82135404782713e-36	1	Serpinf1
Bgn.1	3.97867003289719e-40	-0.72794534339548	0.444	0.739	6.16654068398736e-36	1	Bgn
Id2	5.25372409813615e-40	0.465386185048011	0.316	0.078	8.14274697970122e-36	1	Id2
Timp3.1	6.50828514576827e-40	-0.821205315798454	0.088	0.458	1.00871911474262e-35	1	Timp3
Plekho1	6.68666663121204e-40	0.335101530522926	0.277	0.059	1.03636646117155e-35	1	Plekho1
Sparcl1.1	6.92403666236683e-40	-0.943587651998774	0.186	0.548	1.07315644230024e-35	1	Sparcl1
Rassf4	9.85562477193383e-40	0.264691031172065	0.195	0.026	1.52752328340202e-35	1	Rassf4
Tuba1a	1.4015507606981e-39	-0.556431286219851	0.203	0.584	2.17226352400599e-35	1	Tuba1a
Loxl2.1	1.50013997904651e-39	-0.649577639364536	0.042	0.409	2.32506695352419e-35	1	Loxl2
Fbn1.1	2.81869166031357e-39	-0.938547277438065	0.444	0.715	4.36869020432e-35	1	Fbn1
Mir692-1	3.15609807482875e-39	0.616112514458534	0.523	0.248	4.89163640617708e-35	1	Mir692-1
Npc2	4.15058913748789e-39	0.581371229321544	0.754	0.556	6.43299810419248e-35	1	Npc2
Gatm.1	6.94004140533497e-39	0.42791847591163	0.314	0.075	1.07563701741287e-34	1	Gatm
Zbtb20	9.60896773151411e-39	-0.585542466509037	0.099	0.478	1.48929390870737e-34	1	Zbtb20
Calu	1.63892874069021e-38	-0.461259348632496	0.107	0.488	2.54017565519575e-34	1	Calu
Slc25a4.1	1.79738587642789e-38	-0.442643171677583	0.333	0.703	2.78576836987559e-34	1	Slc25a4
Grn	2.59867334717701e-38	0.68162133507561	0.554	0.289	4.02768382078965e-34	1	Grn
Ccdc80	3.18293292491718e-38	-0.781818511301689	0.071	0.433	4.93322774032914e-34	1	Ccdc80
Sdc3	5.20014746322762e-38	0.363921593121324	0.297	0.074	8.05970855325649e-34	1	Sdc3
Sptbn1	1.52892280213222e-37	-0.486825172017905	0.251	0.625	2.36967745102473e-33	1	Sptbn1
Cd34	1.59554183262861e-37	-0.552785136672631	0.048	0.407	2.47293028639109e-33	1	Cd34
Prkcdbp	2.07662159739358e-37	-0.456448254219578	0.04	0.402	3.21855581380031e-33	1	Prkcdbp
Lamp1	2.23542891241552e-37	0.624340285121987	0.723	0.55	3.46469127135282e-33	1	Lamp1
B2m.1	2.46270691368558e-37	0.541554109758719	0.994	0.89	3.81694944552127e-33	1	B2m
Mmp2	2.56529622365864e-37	-0.655296597573003	0.282	0.61	3.97595261704853e-33	1	Mmp2
Ccl3	1.01475494263357e-36	0.265341541997266	0.201	0.03	1.57276868558777e-32	1	Ccl3
Serping1	1.20837055933742e-36	-0.822435124875188	0.206	0.551	1.87285352991707e-32	1	Serping1
Fkbp9	1.53085663526885e-36	-0.422237488759292	0.023	0.366	2.37267469900319e-32	1	Fkbp9
Rplp1	3.33600970457094e-36	-0.41968133903768	0.966	0.987	5.1704814411145e-32	1	Rplp1
Gpc3	1.05536322469614e-35	-0.714846934601218	0.056	0.405	1.63570746195655e-31	1	Gpc3
Igfbp6	1.23767882905813e-35	-0.872269931784781	0.229	0.558	1.91827841715719e-31	1	Igfbp6
Zfp36.1	1.69825461501535e-35	0.726400140385983	0.619	0.353	2.63212482781229e-31	1	Zfp36
Ccl4	2.28092311017561e-35	0.36468279878266	0.169	0.021	3.53520272846118e-31	1	Ccl4
Ebf1	6.13092226113587e-35	-0.476298800070163	0.02	0.351	9.50231641253448e-31	1	Ebf1
Tnfaip3	9.21316395149649e-35	0.319267189460939	0.22	0.041	1.42794828084244e-30	1	Tnfaip3
S100a11.1	1.29936813353004e-34	-0.511332940582505	0.602	0.82	2.01389067015821e-30	1	S100a11
Cst3.1	1.71216966061618e-34	0.366418034353861	0.921	0.771	2.65369175698902e-30	1	Cst3
Rcn1.1	2.10102453145952e-34	-0.428820843311733	0.048	0.385	3.25637792130911e-30	1	Rcn1
Clec4e	3.32671608760586e-34	0.380044286065626	0.192	0.03	5.15607726418032e-30	1	Clec4e
Bicc1	4.16090520596336e-34	-0.598583145479393	0.048	0.385	6.44898697872261e-30	1	Bicc1
Tcirg1	8.53533559120218e-34	0.440468437923588	0.359	0.12	1.32289166328043e-29	1	Tcirg1
C1s	9.15555831723438e-34	-0.627780145973115	0.071	0.404	1.41901998358816e-29	1	C1s
Laptm4a	4.26100346334639e-33	-0.403220563625403	0.757	0.91	6.60412926784057e-29	1	Laptm4a
Col4a1.1	1.10986725621917e-32	-0.657652623510409	0.096	0.43	1.72018326041409e-28	1	Col4a1
Cstb	1.80773740599758e-32	0.676766365138222	0.548	0.303	2.80181220555565e-28	1	Cstb
Prrx1.1	2.0479147271687e-32	-0.556419488476635	0.048	0.37	3.17406303563877e-28	1	Prrx1
Hexb	6.59182433049406e-32	0.471744562485106	0.367	0.132	1.02166685298327e-27	1	Hexb
Atf3	7.68743150369337e-32	0.392322832707565	0.379	0.129	1.19147500875744e-27	1	Atf3
Snx5	1.05798919733201e-31	0.399671245414262	0.398	0.153	1.63977745694488e-27	1	Snx5
Rbp1.1	1.08589403535756e-31	-0.479219623843312	0.025	0.338	1.68302716540068e-27	1	Rbp1
Rpl22l1	1.5173830395375e-31	-0.426645729501937	0.195	0.538	2.35179197297917e-27	1	Rpl22l1
Ptpn18	1.71183211926614e-31	0.31177684997715	0.266	0.068	2.65316860165059e-27	1	Ptpn18
Lamb1	1.87059038407294e-31	-0.390551296548844	0.014	0.315	2.89922803627464e-27	1	Lamb1
Ucp2	2.50910950795454e-31	0.320813460056202	0.356	0.119	3.88886882637874e-27	1	Ucp2
Ly6a	2.55091395142566e-31	-0.862323004632278	0.41	0.663	3.95366153331464e-27	1	Ly6a
Igf1.1	3.39287413502604e-31	-0.743408496266237	0.22	0.536	5.25861562187686e-27	1	Igf1
Fermt2	3.51760768807342e-31	-0.38112780107711	0.031	0.342	5.45194015574499e-27	1	Fermt2
Tm4sf1.1	4.36752953451847e-31	-0.618139266588846	0.045	0.355	6.76923402555017e-27	1	Tm4sf1
Il6st	7.0247874462704e-31	-0.501117601841079	0.15	0.483	1.08877180629745e-26	1	Il6st
Fxyd5.1	8.760203258695e-31	0.499297004533221	0.528	0.273	1.35774390306514e-26	1	Fxyd5
RP23-103I12.13.1	1.56033486277149e-30	-0.433960952455351	0.031	0.336	2.41836300380954e-26	1	RP23-103I12.13
Efemp1	2.43233706801479e-30	-0.573908937085669	0.059	0.367	3.76987922171612e-26	1	Efemp1
Mfap5.1	2.84829069607999e-30	-0.71056122186955	0.144	0.458	4.41456574985438e-26	1	Mfap5
Stab1	3.18149562545163e-30	0.292310062200139	0.218	0.047	4.93100006988749e-26	1	Stab1
Atp6v0b	4.34699134900146e-30	0.387798670053827	0.435	0.191	6.73740189181736e-26	1	Atp6v0b
Rarres2	6.10570724735564e-30	-0.523226334431087	0.056	0.361	9.46323566267651e-26	1	Rarres2
Col8a1	8.72435880710163e-30	-0.768778211583725	0.062	0.365	1.35218837151268e-25	1	Col8a1
Hmha1	9.13333566116386e-30	0.267210506529227	0.206	0.042	1.41557569412379e-25	1	Hmha1
Igfbp5	9.19047888229904e-30	-1.2316056767958	0.424	0.648	1.42443232196753e-25	1	Igfbp5
Ckap4.1	1.03875460592867e-29	-0.447686162540894	0.144	0.478	1.60996576372884e-25	1	Ckap4
Gda.1	1.13801730810292e-29	0.503099664832437	0.452	0.202	1.76381302582872e-25	1	Gda
Dpysl3.1	1.67060074204507e-29	-0.394431833758075	0.025	0.319	2.58926409009565e-25	1	Dpysl3
Col5a3.1	1.84984584931699e-29	-0.496956687119689	0.059	0.369	2.86707608185641e-25	1	Col5a3
Postn.1	5.63708681677801e-29	-0.885233987321154	0.308	0.573	8.73692085732424e-25	1	Postn
Junb.1	6.67879048020378e-29	0.554877209863962	0.709	0.483	1.03514573652678e-24	1	Junb
Serpinb6a	6.99480131326638e-29	-0.405237395225081	0.198	0.535	1.08412425554316e-24	1	Serpinb6a
Col4a2.1	1.39471611000473e-28	-0.522915871839335	0.051	0.345	2.16167049889633e-24	1	Col4a2
Nceh1	1.8575470583892e-28	0.268580026541897	0.198	0.042	2.87901218579742e-24	1	Nceh1
Abhd12	2.81820343542812e-28	0.270381600891415	0.24	0.062	4.36793350457005e-24	1	Abhd12
Pltp	7.10416573848826e-28	0.430019275173598	0.381	0.153	1.1010746478083e-23	1	Pltp
Cpxm1	1.28150889745493e-27	-0.506081589157875	0.051	0.339	1.9862106401654e-23	1	Cpxm1
H2-K1.1	1.84052318251088e-27	0.467238676427631	0.777	0.557	2.85262688057361e-23	1	H2-K1
Hspg2	3.12912199236154e-27	-0.396474628791943	0.088	0.388	4.84982617596115e-23	1	Hspg2
Smpdl3a	4.3060842260517e-27	0.259054220479642	0.246	0.067	6.67399994195754e-23	1	Smpdl3a
Cnn3	5.05130413060381e-27	-0.328454034630511	0.034	0.314	7.82901627202285e-23	1	Cnn3
Gpx8	5.41738760415651e-27	-0.358961937854892	0.045	0.328	8.39640904768217e-23	1	Gpx8
Tnf	5.47538180976185e-27	0.252259859386769	0.141	0.02	8.48629426694989e-23	1	Tnf
Timp1	7.70455311268735e-27	-0.604177664752086	0.169	0.467	1.19412868693541e-22	1	Timp1
Col14a1.1	7.8499273018823e-27	-0.647081709682408	0.105	0.393	1.21666023251874e-22	1	Col14a1
Selm	9.10163191819432e-27	-0.365918715928291	0.088	0.384	1.41066193100094e-22	1	Selm
Islr	9.14445219822822e-27	-0.382665174695174	0.02	0.289	1.41729864620339e-22	1	Islr
Mmp14.1	1.25211096754958e-26	-0.405707656820275	0.172	0.488	1.94064678860509e-22	1	Mmp14
Sod3	1.50154049333823e-26	-0.399573162008681	0.04	0.318	2.32723761062493e-22	1	Sod3
Rpl13-ps3	1.9050376954348e-26	-0.34100850914237	0.234	0.563	2.9526179241544e-22	1	Rpl13-ps3
Eef1g	3.47890517465904e-26	-0.347251708710511	0.113	0.416	5.39195513020405e-22	1	Eef1g
Abca1	3.76243865397811e-26	0.394136113183764	0.398	0.172	5.83140366980067e-22	1	Abca1
Man2b1	3.83836536231488e-26	0.292330036433379	0.282	0.091	5.94908247505183e-22	1	Man2b1
Cthrc1.1	3.95853440332596e-26	-0.664349884159468	0.195	0.479	6.13533247171491e-22	1	Cthrc1
Hexa	4.40372437722077e-26	0.464433954372725	0.444	0.228	6.82533241225447e-22	1	Hexa
Ppap2b	4.43589998960137e-26	-0.571480846843753	0.09	0.376	6.87520139388317e-22	1	Ppap2b
Mmp12	5.33726375321499e-26	0.538193611470172	0.13	0.018	8.27222509110792e-22	1	Mmp12
Rgs10	5.55176938820847e-26	0.252939412769495	0.218	0.055	8.60468737478431e-22	1	Rgs10
Creg1	1.23710573785243e-25	0.42515296531718	0.325	0.124	1.91739018309749e-21	1	Creg1
Gngt2	2.00301210952439e-25	0.40364774840578	0.347	0.137	3.10446846855186e-21	1	Gngt2
Cd93.1	2.03510046744609e-25	0.263949197582069	0.297	0.094	3.1542022144947e-21	1	Cd93
Arpc2	2.12508653434775e-25	0.431173820130492	0.737	0.587	3.29367161958558e-21	1	Arpc2
Adamts2	3.19768601832861e-25	-0.374453325837947	0.045	0.316	4.95609355980752e-21	1	Adamts2
Il1b	5.56548904002167e-25	0.346456746301717	0.201	0.046	8.62595146312959e-21	1	Il1b
mt-Cytb	7.36201219118313e-25	-0.441728026194919	0.797	0.898	1.14103826951147e-20	1	mt-Cytb
Vkorc1	7.44366830819978e-25	-0.373692634102535	0.076	0.347	1.15369415108788e-20	1	Vkorc1
Grb10.1	9.01927992882236e-25	-0.383022327250254	0.037	0.298	1.39789819616818e-20	1	Grb10
Cyr61.1	9.19406652533325e-25	-0.556139366105558	0.068	0.333	1.4249883707614e-20	1	Cyr61
Aspn.1	9.56367342807942e-25	-0.56545909805436	0.042	0.302	1.48227374461803e-20	1	Aspn
S100a6.1	9.94805711497482e-25	-0.48708527824933	0.96	0.971	1.54184937224995e-20	1	S100a6
KCTD12	1.00151684714148e-24	0.327322239911728	0.271	0.088	1.55225096138457e-20	1	KCTD12
Fkbp7	1.25503046676913e-24	-0.309832289950818	0.025	0.279	1.94517172044548e-20	1	Fkbp7
Sep15	1.33163747403014e-24	-0.322240990810403	0.246	0.559	2.06390492099932e-20	1	Sep15
Maged2	1.96572420434061e-24	-0.333562494683262	0.045	0.308	3.04667594430751e-20	1	Maged2
Slc6a6	2.00263715676421e-24	0.29336503721998	0.359	0.143	3.10388732926885e-20	1	Slc6a6
Vcan.1	2.08742791144037e-24	-0.385799240995266	0.065	0.341	3.23530451994142e-20	1	Vcan
0610007N19Rik	2.4949453501308e-24	-0.292393126211459	0.008	0.253	3.86691579816772e-20	1	0610007N19Rik
Htra1	2.52675771886426e-24	-0.340658067889897	0.037	0.296	3.91622178846772e-20	1	Htra1
Maf	2.55388538642114e-24	0.457471330976002	0.404	0.186	3.95826696041412e-20	1	Maf
S100a16	3.27113012921756e-24	-0.32454271130381	0.034	0.289	5.0699245872743e-20	1	S100a16
Cd97	3.41356792114403e-24	0.294108854924658	0.266	0.085	5.29068892098113e-20	1	Cd97
Rplp0	3.42129966962019e-24	-0.384349878723922	0.805	0.911	5.30267235794434e-20	1	Rplp0
Fxyd1	3.59715801664032e-24	-0.326304066497239	0.023	0.27	5.57523520999083e-20	1	Fxyd1
Gas5	5.36197480216405e-24	-0.341426334442765	0.508	0.768	8.31052474587407e-20	1	Gas5
Atp6v1b2	6.00274199256492e-24	0.252299693493043	0.232	0.067	9.30364981427636e-20	1	Atp6v1b2
Olfml3.1	6.09094467348231e-24	-0.366522375191848	0.065	0.336	9.44035514943023e-20	1	Olfml3
Arl4c	6.11828764690825e-24	0.295534371915879	0.26	0.083	9.48273402394309e-20	1	Arl4c
Nr2f2	6.49448518220162e-24	-0.361005012911402	0.034	0.288	1.00658025838943e-19	1	Nr2f2
Ccnd1	8.7887997892751e-24	-0.41435256060833	0.025	0.274	1.36217607933975e-19	1	Ccnd1
Dpt	9.10834758470117e-24	-0.739864431901833	0.059	0.313	1.41170279215284e-19	1	Dpt
Pdgfra	9.76839006589789e-24	-0.304352824186192	0.02	0.267	1.51400277631351e-19	1	Pdgfra
Metrnl	9.91848839848071e-24	0.332247883364827	0.35	0.14	1.53726651688053e-19	1	Metrnl
Ebf2	1.09570951743718e-23	-0.301760876215059	0.011	0.25	1.69824018107588e-19	1	Ebf2
Pam	1.39447271739456e-23	-0.334427373891144	0.037	0.291	2.16129326468983e-19	1	Pam
Gm10275	1.45855912921292e-23	-0.341730766946234	0.254	0.559	2.26062079436711e-19	1	Gm10275
Fgfr1	1.54100085285755e-23	-0.301560271655595	0.031	0.279	2.38839722184391e-19	1	Fgfr1
Ppib	1.60556796137888e-23	-0.354691653334508	0.395	0.667	2.48846978334113e-19	1	Ppib
Arhgdib	2.53170773044685e-23	0.278615181369596	0.268	0.086	3.92389381141958e-19	1	Arhgdib
Rpl4	2.62363767261163e-23	-0.355020556243533	0.864	0.929	4.06637602878076e-19	1	Rpl4
Pcdhga9	2.65723892730575e-23	-0.275055935488218	0.025	0.273	4.11845461343118e-19	1	Pcdhga9
Eef1b2.1	2.66765813403151e-23	-0.323144996230393	0.732	0.893	4.13460334193544e-19	1	Eef1b2
Mfap2	3.19553121515022e-23	-0.322059069397017	0.025	0.269	4.95275383036132e-19	1	Mfap2
Gusb	3.3645787447607e-23	0.322585139627459	0.291	0.107	5.21476059650462e-19	1	Gusb
Medag	3.60965493427258e-23	-0.336361695762098	0.031	0.275	5.59460418262907e-19	1	Medag
C1ra	5.61633107066069e-23	-0.396453317236177	0.042	0.289	8.704751526417e-19	1	C1ra
Csrp2.1	7.9089252835344e-23	-0.387015725658057	0.042	0.29	1.225804329695e-18	1	Csrp2
Lamb2	8.26451363573512e-23	-0.293783613689003	0.02	0.257	1.28091696840259e-18	1	Lamb2
Maged1.1	9.27623535368462e-23	-0.311419872447269	0.09	0.364	1.43772371746758e-18	1	Maged1
Ifi27	1.08662009609795e-22	-0.310350811266338	0.068	0.324	1.68415248694222e-18	1	Ifi27
Sepp1.1	1.32384967801723e-22	0.741679158872361	0.633	0.484	2.05183461595891e-18	1	Sepp1
Adamts1	1.3969044936745e-22	-0.414022124098698	0.028	0.267	2.16506227474611e-18	1	Adamts1
Clec3b.1	1.83809691017357e-22	-0.706585569545957	0.034	0.27	2.84886640107802e-18	1	Clec3b
Lamc1	1.92315262428946e-22	-0.297766376827973	0.042	0.29	2.98069425238624e-18	1	Lamc1
Slpi	2.04152480080831e-22	0.285962479516706	0.116	0.017	3.1641592887728e-18	1	Slpi
Sdc2	2.54078543158175e-22	-0.285985006020409	0.017	0.25	3.93796334040856e-18	1	Sdc2
Wbp5.1	2.66798186435497e-22	-0.312328201105026	0.138	0.428	4.13510509156377e-18	1	Wbp5
Lum	3.00782468553596e-22	-0.876182764722293	0.605	0.726	4.66182748011218e-18	1	Lum
Gm24098	3.12273637360232e-22	0.312881329042233	0.291	0.11	4.83992910544624e-18	1	Gm24098
Tnxb	3.15790797092329e-22	-0.382631379706195	0.025	0.26	4.89444156413401e-18	1	Tnxb
Efemp2	4.02409972914954e-22	-0.287478594232164	0.054	0.303	6.23695217020887e-18	1	Efemp2
Ablim1	4.30519057037903e-22	-0.324424714394364	0.006	0.227	6.67261486503046e-18	1	Ablim1
Sec62	4.99393959085925e-22	-0.286996255588254	0.22	0.533	7.74010697187276e-18	1	Sec62
Cygb	5.5905454936986e-22	-0.423008156427149	0.059	0.309	8.66478646068346e-18	1	Cygb
Soat1	5.94340446321386e-22	0.266121346437434	0.243	0.079	9.21168257753515e-18	1	Soat1
Hmgn1.1	7.25486513036072e-22	-0.330815969147289	0.121	0.389	1.12443154655461e-17	1	Hmgn1
Golim4	8.47248848984554e-22	-0.271663135713583	0.034	0.272	1.31315099104116e-17	1	Golim4
Tgfbr3	1.13001527388909e-21	-0.281322430143614	0.02	0.246	1.7514106730007e-17	1	Tgfbr3
Dazap2	1.14507068001115e-21	0.326856979479727	0.37	0.167	1.77474504694928e-17	1	Dazap2
Thy1	1.29375057409386e-21	-0.421392537293728	0.096	0.351	2.00518401478807e-17	1	Thy1
Lox.1	1.47960314413388e-21	-0.668735562051237	0.096	0.344	2.2932369130931e-17	1	Lox
Cfl2	1.75871129787438e-21	-0.262944121863474	0.014	0.235	2.7258266405755e-17	1	Cfl2
Prelp	1.76698755499918e-21	-0.296239088442314	0.031	0.263	2.73865401149324e-17	1	Prelp
Heg1	2.03413824723123e-21	-0.311384115085718	0.031	0.263	3.15271086938369e-17	1	Heg1
Nbl1	2.29946315959245e-21	-0.37464443385551	0.028	0.261	3.56393795105234e-17	1	Nbl1
Oaf.1	2.39965516175557e-21	-0.346250281593298	0.062	0.306	3.71922553520496e-17	1	Oaf
BC005537	2.43816654803713e-21	0.408125874622183	0.455	0.253	3.77891433280274e-17	1	BC005537
Serpine2.1	2.56170677839162e-21	-0.60219110732309	0.045	0.278	3.97038933582917e-17	1	Serpine2
Plat	2.80500852054811e-21	-0.316129808714395	0.051	0.291	4.34748270599752e-17	1	Plat
Tshz2	3.05048775923694e-21	-0.327405529907739	0.028	0.254	4.72795097804133e-17	1	Tshz2
Cd248	3.13343860613156e-21	-0.401364683658247	0.048	0.284	4.8565164956433e-17	1	Cd248
Rap1b	3.2232923795954e-21	0.421069295862111	0.449	0.247	4.99578085913491e-17	1	Rap1b
Sdcbp	4.59784084994153e-21	0.41877253990676	0.435	0.241	7.12619353332437e-17	1	Sdcbp
Col16a1	6.76282913315881e-21	-0.28450350836353	0.048	0.287	1.04817088734828e-16	1	Col16a1
Thbs2.1	7.13956279214293e-21	-0.444803637360896	0.079	0.324	1.10656083715423e-16	1	Thbs2
Rhoj	7.92485041640201e-21	-0.276227238388083	0.028	0.255	1.22827256603815e-16	1	Rhoj
Loxl1	8.0603506482564e-21	-0.327869749575045	0.054	0.291	1.24927374697326e-16	1	Loxl1
Ehd2	8.32556383685947e-21	-0.263983703470243	0.028	0.251	1.29037913907485e-16	1	Ehd2
Nfia	1.00046622089679e-20	-0.274257960387383	0.028	0.251	1.55062259576794e-16	1	Nfia
Hilpda	1.00472875833862e-20	0.392171938660049	0.198	0.058	1.55722910254903e-16	1	Hilpda
Txndc5	1.0360467672963e-20	-0.293765738298351	0.079	0.323	1.60576888463253e-16	1	Txndc5
Cyb5r3	1.53390501068775e-20	-0.37511065429107	0.144	0.406	2.37739937606494e-16	1	Cyb5r3
Arf4	2.37858434732027e-20	-0.31804260745262	0.172	0.445	3.68656787991169e-16	1	Arf4
Kdelr2.1	2.82145579854589e-20	-0.29080108680929	0.13	0.394	4.37297434216627e-16	1	Kdelr2
Mfsd1	3.09636692654925e-20	0.268613000113583	0.24	0.083	4.79905909945867e-16	1	Mfsd1
Gm10073	3.3084974395592e-20	-0.29850912433596	0.237	0.521	5.1278401815728e-16	1	Gm10073
Itm2a	3.78241118163361e-20	-0.443094496225828	0.11	0.355	5.86235909041394e-16	1	Itm2a
Lama4	3.95742815194828e-20	-0.282678072170698	0.045	0.275	6.13361789270464e-16	1	Lama4
Sox4	5.63583270176272e-20	-0.331378013321946	0.031	0.251	8.73497710446205e-16	1	Sox4
Gpx7	6.33719368583334e-20	-0.260689231181314	0.04	0.262	9.82201649367309e-16	1	Gpx7
Col15a1.1	6.37183674594078e-20	-0.483277544766782	0.082	0.315	9.87570977253361e-16	1	Col15a1
Gng11	8.28101404687398e-20	-0.349543823972256	0.062	0.291	1.283474367125e-15	1	Gng11
Sept11	9.37930943382413e-20	-0.346927489084183	0.11	0.362	1.4536991691484e-15	1	Sept11
S100a4.1	1.08238695335315e-19	0.343875942162662	0.562	0.315	1.67759153900205e-15	1	S100a4
Actr3	1.23549939042367e-19	0.330549690338849	0.401	0.206	1.91490050521765e-15	1	Actr3
Cpe.1	1.27090307965745e-19	-0.375380431130796	0.045	0.268	1.96977268316108e-15	1	Cpe
Bmp1	1.64927053012731e-19	-0.286123052803956	0.045	0.267	2.55620439464431e-15	1	Bmp1
Sat1.1	1.81324391869918e-19	0.421631044974089	0.483	0.278	2.81034674959185e-15	1	Sat1
Map1b	1.90858698622197e-19	-0.254898243217648	0.011	0.214	2.95811896994543e-15	1	Map1b
Ly6c1	2.01272530057707e-19	-0.625528446192775	0.141	0.372	3.11952294336439e-15	1	Ly6c1
Il33	2.76218661584443e-19	-0.385648671446524	0.037	0.253	4.28111303589727e-15	1	Il33
Lrp6	3.2225857535609e-19	-0.292820558643864	0.042	0.262	4.99468565944404e-15	1	Lrp6
Prnp	3.72980649814959e-19	-0.288847249356826	0.056	0.283	5.78082709148205e-15	1	Prnp
Akap12	4.37765269796556e-19	-0.277386629345425	0.023	0.23	6.78492391657682e-15	1	Akap12
Cav1	5.34520432868971e-19	-0.42750814944121	0.062	0.288	8.28453218903618e-15	1	Cav1
Bzw2	5.64466357735645e-19	-0.254606933513651	0.025	0.233	8.74866407854476e-15	1	Bzw2
Fap	5.94598389013567e-19	-0.250753804306104	0.014	0.213	9.21568043132127e-15	1	Fap
Atp6ap1	7.74500875594741e-19	0.296653848117984	0.345	0.162	1.20039890708429e-14	1	Atp6ap1
Itih5	7.98789439157883e-19	-0.362229489543123	0.025	0.231	1.2380437517508e-14	1	Itih5
Mxra8	8.04430271062017e-19	-0.251459717285206	0.04	0.253	1.24678647711902e-14	1	Mxra8
Ccnd2	8.37933181197435e-19	-0.30986534015408	0.028	0.235	1.2987126375379e-14	1	Ccnd2
Gm10260	1.15505456135812e-18	-0.28803142226691	0.531	0.758	1.79021906464894e-14	1	Gm10260
Adamts5	1.16014385318427e-18	-0.32267234551047	0.011	0.208	1.79810695805029e-14	1	Adamts5
Errfi1	1.29340156909616e-18	-0.347482655494616	0.045	0.256	2.00464309194213e-14	1	Errfi1
Fkbp1a	2.52275602847881e-18	-0.341039222380545	0.172	0.418	3.91001956853931e-14	1	Fkbp1a
Cp.1	3.4395869181432e-18	-0.672463736345454	0.042	0.248	5.33101576443015e-14	1	Cp
Ramp2.1	3.81788530141072e-18	-0.316272925967424	0.023	0.219	5.91734042865647e-14	1	Ramp2
Eef1a1	3.99754639409084e-18	-0.332053312808831	0.777	0.859	6.1957971562014e-14	1	Eef1a1
Ctsh	4.19558324825883e-18	0.331294041259087	0.404	0.212	6.50273447647636e-14	1	Ctsh
Rps20	4.24135062333291e-18	-0.266698862409024	0.932	0.97	6.57366933110367e-14	1	Rps20
Steap4	4.32224969642392e-18	-0.293525382570718	0.014	0.205	6.69905480448743e-14	1	Steap4
Nfix.1	5.30340742518365e-18	-0.295255622876539	0.073	0.297	8.21975116829214e-14	1	Nfix
Rnase4	6.27633620446595e-18	-0.426918699930531	0.339	0.57	9.72769348330177e-14	1	Rnase4
Id3	6.68262680161811e-18	-0.35932236316065	0.045	0.253	1.03574032798279e-13	1	Id3
mt-Nd5	6.95690560218962e-18	-0.401144581437096	0.153	0.391	1.07825079928337e-13	1	mt-Nd5
Cd44	6.9634156325192e-18	0.351589200356924	0.449	0.256	1.07925978888415e-13	1	Cd44
Nfkbia	7.38940408698139e-18	0.522096480069488	0.531	0.344	1.14528373944125e-13	1	Nfkbia
Cxcl12	7.57390773874217e-18	-0.524405022149858	0.079	0.3	1.17387996042765e-13	1	Cxcl12
Sept7	8.57846416110885e-18	-0.30625747955691	0.455	0.681	1.32957616033026e-13	1	Sept7
Igfbp3.1	1.35688784939057e-17	-0.465128678004475	0.034	0.232	2.10304047777044e-13	1	Igfbp3
Ccl11.1	1.49308176670282e-17	-0.509827402068211	0.073	0.283	2.3141274302127e-13	1	Ccl11
Rpl18a	1.86573042469135e-17	-0.281041309731521	0.325	0.59	2.89169558522912e-13	1	Rpl18a
Abca8a.1	2.01872529974112e-17	-0.332836802785606	0.042	0.24	3.12882234206877e-13	1	Abca8a
Scara5	2.72529317089228e-17	-0.321132096416629	0.037	0.234	4.22393188556594e-13	1	Scara5
Swi5	2.9843811925113e-17	-0.251571991683954	0.189	0.441	4.62549241027326e-13	1	Swi5
Ddr2	3.05605283263498e-17	-0.263427351413439	0.037	0.233	4.73657628530095e-13	1	Ddr2
Matn2	3.06643559598689e-17	-0.27000395887081	0.031	0.225	4.75266853022008e-13	1	Matn2
Sfrp4	3.33912942439476e-17	-1.0070599124917	0.113	0.326	5.17531669486944e-13	1	Sfrp4
Msrb1	4.06689876913842e-17	0.277194072143519	0.271	0.114	6.30328640228764e-13	1	Msrb1
Col18a1	4.16080236127385e-17	-0.279674919510658	0.048	0.248	6.44882757973834e-13	1	Col18a1
Ostc	4.92315330500131e-17	-0.258709018516775	0.11	0.34	7.63039530742153e-13	1	Ostc
Sema3c	5.46792619255645e-17	-0.357606627255064	0.017	0.199	8.47473880584325e-13	1	Sema3c
Kitl	7.53041910207575e-17	-0.278162011170375	0.034	0.226	1.16713965663072e-12	1	Kitl
Ece1	8.14185467138542e-17	-0.294658160424675	0.062	0.267	1.26190605551803e-12	1	Ece1
Ttc3	1.29435266988628e-16	-0.262643884436623	0.093	0.314	2.00611720305674e-12	1	Ttc3
Rpl41.1	1.40856838922295e-16	-0.264155821527889	0.963	0.963	2.18314014645665e-12	1	Rpl41
Dhrs3	1.98647933782302e-16	0.283167077781639	0.308	0.142	3.0788443256919e-12	1	Dhrs3
Ptpn1	2.43197743422738e-16	0.274403783845326	0.266	0.112	3.76932182530902e-12	1	Ptpn1
Ier3	2.55571708548112e-16	0.550322439165173	0.381	0.209	3.9611059107872e-12	1	Ier3
Ptbp3	3.55948086322161e-16	0.307115935602892	0.398	0.216	5.51683938990718e-12	1	Ptbp3
Prss23	4.09771777017371e-16	-0.252530242867795	0.014	0.188	6.35105277199223e-12	1	Prss23
Timp2	4.43746745452169e-16	-0.431927705429837	0.407	0.628	6.87763080776317e-12	1	Timp2
Ifngr1	4.98443732606609e-16	0.286599645594981	0.322	0.153	7.72537941166983e-12	1	Ifngr1
Serinc3.1	5.88711020559686e-16	0.411497592469421	0.494	0.326	9.12443210765458e-12	1	Serinc3
Pdia3.1	6.14483762166625e-16	-0.253785053921204	0.52	0.739	9.52388382982052e-12	1	Pdia3
Fndc1	1.20345529157037e-15	-0.359013478195242	0.031	0.208	1.86523535640491e-11	1	Fndc1
Pid1	1.83271601193542e-15	0.283699227985764	0.263	0.115	2.84052654689870e-11	1	Pid1
Cd63	2.12124658458154e-15	-0.293566338481686	0.54	0.722	3.28772008144292e-11	1	Cd63
Scd2	2.24344544276307e-15	-0.259925311860774	0.138	0.359	3.47711609173848e-11	1	Scd2
Rpl13a	2.48673804847485e-15	-0.266450951770939	0.921	0.965	3.85419530133117e-11	1	Rpl13a
Gpx3.1	3.22696189735467e-15	-0.433723701898022	0.059	0.244	5.00146824471e-11	1	Gpx3
Atp6v1a	3.60734924874955e-15	0.307200856316122	0.308	0.154	5.59103060063693e-11	1	Atp6v1a
H19.1	4.44644501666746e-15	-0.966117699850926	0.11	0.299	6.89154513133289e-11	1	H19
Pdia6.1	4.66419961019316e-15	-0.266529463266067	0.305	0.557	7.22904297583837e-11	1	Pdia6
Tnc.1	5.46054033149141e-15	-0.530579770872011	0.045	0.22	8.46329145977853e-11	1	Tnc
Sdpr.1	5.95220093531533e-15	-0.466512972574197	0.025	0.193	9.22531622964523e-11	1	Sdpr
Ltbp4	6.43375286143321e-15	-0.295381766531393	0.037	0.21	9.97167355993533e-11	1	Ltbp4
Tmsb10.1	8.25540332416588e-15	-0.31655739528084	0.746	0.842	1.27950496121247e-10	1	Tmsb10
Npm1.1	1.33630762761247e-14	-0.295759022096655	0.328	0.557	2.07114319203657e-10	1	Npm1
Ubc	1.3722455613687e-14	0.375933810401692	0.715	0.627	2.12684339556534e-10	1	Ubc
Klf6	1.48593163215911e-14	0.385794334915202	0.732	0.578	2.3030454366834e-10	1	Klf6
Lgals1.1	1.63004782219761e-14	-0.397067220549534	0.958	0.918	2.52641111962408e-10	1	Lgals1
Lbp	2.07175820363155e-14	-0.316878609589921	0.031	0.198	3.21101803980854e-10	1	Lbp
Rps26-ps1	2.49589292560927e-14	-0.27592242566447	0.61	0.781	3.86838444540181e-10	1	Rps26-ps1
Cd200	3.03782094015996e-14	-0.2910222523526	0.045	0.216	4.70831867515392e-10	1	Cd200
Htra3	3.19128388081331e-14	-0.394175301537825	0.068	0.247	4.94617088687255e-10	1	Htra3
Rps4x	3.36287990883059e-14	-0.262096020040426	0.619	0.809	5.21212757069654e-10	1	Rps4x
Thbs4	3.46144055965965e-14	-0.479103764456179	0.048	0.215	5.3648867234165e-10	1	Thbs4
Ctgf.1	3.65479506268551e-14	-0.36238561926737	0.04	0.208	5.66456686765628e-10	1	Ctgf
Ugdh	4.0623968534552e-14	-0.323271224768648	0.085	0.272	6.29630888317021e-10	1	Ugdh
Actr2	5.11703758184421e-14	0.264260603397749	0.359	0.199	7.93089654810034e-10	1	Actr2
Vim	5.39719855115323e-14	-0.353193902050886	0.935	0.97	8.3651180344324e-10	1	Vim
Gm6472	6.03062432397654e-14	-0.264704944035226	0.223	0.448	9.34686463973124e-10	1	Gm6472
Ptn	7.36282849660026e-14	-0.343038549476672	0.011	0.159	1.14116478868807e-09	1	Ptn
Il11ra1	7.53188698761452e-14	-0.284164422859135	0.054	0.224	1.16736716421037e-09	1	Il11ra1
Pmepa1.1	7.87027788056625e-14	-0.298926915124066	0.082	0.265	1.21981436870896e-09	1	Pmepa1
Tsc22d3	8.62491353434851e-14	0.283504041651905	0.333	0.174	1.33677534868868e-09	1	Tsc22d3
Penk.1	1.14509831120404e-13	-0.357222326005824	0.023	0.177	1.77478787253514e-09	1	Penk
Crip1	1.92493472357726e-13	0.537697010069841	0.929	0.84	2.98345632807239e-09	1	Crip1
Spp1.1	2.3934913801895e-13	0.327636737202703	0.74	0.581	3.7096722901557e-09	1	Spp1
Mgp	2.52146632798905e-13	-0.879946364907144	0.328	0.5	3.90802066175023e-09	1	Mgp
Tpm4	2.63530365310567e-13	-0.257497124114962	0.198	0.415	4.08445713194848e-09	1	Tpm4
Itgb1	2.75483395927447e-13	-0.271473159381365	0.511	0.711	4.26971715347951e-09	1	Itgb1
Tpm2	3.54822819058568e-13	-0.411641696017222	0.042	0.202	5.49939887258875e-09	1	Tpm2
Smoc2	3.59050684840908e-13	-0.330054391617334	0.037	0.192	5.56492656434923e-09	1	Smoc2
Tcf4.1	4.16479444804772e-13	-0.314576774075399	0.186	0.388	6.45501491502916e-09	1	Tcf4
Fbln1	4.35131006696883e-13	-0.272429419275984	0.037	0.193	6.74409547279498e-09	1	Fbln1
Capza2	4.86654190607018e-13	0.293426377505232	0.412	0.26	7.54265330021817e-09	1	Capza2
Rps3	4.91052566525081e-13	-0.253851625632127	0.895	0.937	7.61082372857222e-09	1	Rps3
Ubb	7.48525119253239e-13	-0.263326351387894	0.195	0.4	1.16013908233059e-08	1	Ubb
Tnfaip6.1	9.41681556373363e-13	-0.280852768127298	0.04	0.193	1.45951224422307e-08	1	Tnfaip6
Emp3	1.03391219487552e-12	0.316894930905908	0.494	0.349	1.60246051083757e-08	1	Emp3
C4b	1.06397304622508e-12	-0.296207329807933	0.034	0.187	1.64905182434425e-08	1	C4b
Gsn.1	1.23424541390388e-12	-1.10957492298862	0.681	0.716	1.91295696700963e-08	1	Gsn
Fbn2	1.23862255578757e-12	-0.280505540255783	0.023	0.166	1.91974109921515e-08	1	Fbn2
Fabp5	1.42053680083425e-12	0.484743738967037	0.243	0.115	2.201689987613e-08	1	Fabp5
Wif1.1	1.98453117304016e-12	-0.291608504751041	0.011	0.145	3.07582486509494e-08	1	Wif1
Lipa	3.72566419660124e-12	0.285843217072216	0.291	0.155	5.77440693831225e-08	1	Lipa
Erp29	3.86916007867153e-12	0.293814953379559	0.438	0.29	5.99681120593301e-08	1	Erp29
Sfrp1.1	4.65818318311282e-12	-0.351084898390944	0.025	0.166	7.21971811550656e-08	1	Sfrp1
mt-Nd4	6.15920146004929e-12	-0.293298907651847	0.418	0.621	9.54614634293039e-08	1	mt-Nd4
Col12a1.1	6.42021847436916e-12	-0.259019148532022	0.025	0.164	9.95069661342476e-08	1	Col12a1
Prdx5	6.61106315306581e-12	0.369592963148215	0.511	0.375	1.02464867809367e-07	1	Prdx5
Neat1.1	8.74847247502129e-12	0.285836102765464	0.446	0.288	1.35592574890355e-07	1	Neat1
Dkk2	1.23907813527655e-11	-0.333124101722124	0.02	0.151	1.92044720186512e-07	1	Dkk2
Cilp.1	3.01285786948924e-11	-0.386908462533041	0.023	0.151	4.66962841192138e-07	1	Cilp
Filip1l	3.11604383611328e-11	-0.338675207809176	0.107	0.275	4.82955634159197e-07	1	Filip1l
Mgll.1	3.65704546540637e-11	-0.27542592734089	0.025	0.155	5.66805476683333e-07	1	Mgll
Marcks	4.32148097009058e-11	-0.297113754424286	0.669	0.794	6.69786335554339e-07	1	Marcks
Tnfaip2	5.45872589763978e-11	0.267943216842382	0.212	0.098	8.4604792687519e-07	1	Tnfaip2
Pecam1.1	8.54868001301949e-11	-0.294005365126022	0.008	0.124	1.32495991521789e-06	1	Pecam1
Myl9	1.07346937872562e-10	-0.395036638059365	0.025	0.15	1.66377019008684e-06	1	Myl9
Gpr116.1	1.45589486654846e-10	-0.320564300807788	0.023	0.144	2.25649145366345e-06	1	Gpr116
Plvap.1	1.72439796142634e-10	-0.424308943443798	0.02	0.139	2.67264440041469e-06	1	Plvap
Phlda1	2.5531490994769e-10	-0.272267369791609	0.121	0.281	3.95712578927925e-06	1	Phlda1
Iqgap1	3.14591897992847e-10	0.306288305345312	0.489	0.383	4.87585982699114e-06	1	Iqgap1
H3f3b	3.40486589980689e-10	0.26865702563078	0.542	0.419	5.2772016581107e-06	1	H3f3b
mt-Nd2	5.26968759237525e-10	-0.253679474023518	0.319	0.503	8.1674887994224e-06	1	mt-Nd2
Sfrp2	5.71672703560381e-10	-0.356198055516583	0.031	0.152	8.86035523248235e-06	1	Sfrp2
Angptl1.1	6.41603851245488e-10	-0.279345653375206	0.025	0.142	9.94421809045382e-06	1	Angptl1
Mt2	7.30092123909586e-10	-0.363715573935565	0.136	0.288	1.13156978284747e-05	1	Mt2
Nov	7.91502570642891e-10	-0.269223318706264	0.025	0.143	1.22674983423942e-05	1	Nov
C3.1	1.08379013370248e-09	-0.721184950092617	0.181	0.322	1.67976632822547e-05	1	C3
Gns	1.59673547761229e-09	0.268191180928012	0.299	0.18	2.47478031675129e-05	1	Gns
Picalm	2.46598553965914e-09	0.292716880480027	0.376	0.26	3.82203098791769e-05	1	Picalm
Tubb5.1	3.07192328642732e-09	-0.255729778711249	0.243	0.416	4.7611739016337e-05	1	Tubb5
Gdf10	3.18166847647432e-09	-0.264848344049812	0.025	0.135	4.93126797168754e-05	1	Gdf10
Mest.1	5.19239687065564e-09	-0.278910170199748	0.04	0.156	8.04769590982918e-05	1	Mest
Ctla2a.1	5.74052884314932e-09	-0.524510856123444	0.068	0.191	8.89724565399713e-05	1	Ctla2a
Sgk1	7.81360773244989e-09	0.447548433972964	0.347	0.24	0.000121103106245241	1	Sgk1
Ifi27l2a	1.02956553513318e-08	0.366179910766595	0.26	0.147	0.000159572362290291	1	Ifi27l2a
Pi16.1	1.16928295206819e-08	-0.560526695844295	0.107	0.235	0.000181227164741048	1	Pi16
Tagln	2.68241564639537e-08	-0.361758296855044	0.017	0.111	0.000415747601034819	1	Tagln
Mylk.1	3.43248930861112e-08	-0.263817900139356	0.028	0.13	0.000532001517941637	1	Mylk
Arpc5	8.73525810848846e-08	0.29305629995294	0.463	0.376	0.00135387765423463	1	Arpc5
Gas6	9.61728298943599e-08	-0.298979233253182	0.079	0.194	0.00149058269053268	1	Gas6
Ccnl1	1.32148214543518e-07	0.300809520962625	0.435	0.329	0.00204816517720999	1	Ccnl1
Egfl7.1	3.77285546719122e-07	-0.288992096422719	0.048	0.144	0.00584754868859967	1	Egfl7
Mmp3	7.55059156204034e-07	-0.253143280981181	0.023	0.104	0.0117026618620063	1	Mmp3
Aqp1	1.59036629705556e-06	-0.454828069498508	0.068	0.162	0.0246490872380641	1	Aqp1
Ctsl	1.70638857173663e-06	0.590232966463645	0.895	0.838	0.0264473164733461	1	Ctsl
Acta2	3.01238289797932e-06	-0.59523125638803	0.051	0.137	0.0466889225357814	1	Acta2
Angptl7	1.10812934367425e-05	-0.270764920517123	0.031	0.104	0.171748966976072	1	Angptl7
Clta	1.70220168521307e-05	0.28392137329037	0.421	0.361	0.263824239191174	1	Clta
Cxcl14.1	2.02680954257502e-05	-0.440420325475491	0.088	0.173	0.314135211003702	1	Cxcl14
Klf2.1	3.65488298580925e-05	0.250785441859581	0.35	0.262	0.566470313970576	1	Klf2
Akr1a1	0.000341844008873459	0.261787965287283	0.46	0.442	1	1	Akr1a1
Lsp1.1	0.000762279666006759	-0.294429133197075	0.291	0.363	1	1	Lsp1
Dbi	0.00168945404346149	-0.269677699811828	0.297	0.385	1	1	Dbi
Apod.1	0.00225610933821002	-1.62167482101854	0.958	0.934	1	1	Apod
Lrg1.1	0.00324620551888693	-0.300120297419209	0.068	0.118	1	1	Lrg1
Thbs4.1	4.39079954851088e-264	1.33942279422256	0.86	0.075	6.80530022023701e-260	2	Thbs4
Cp.2	1.60157450933757e-249	1.70526605699387	0.879	0.103	2.4822803320223e-245	2	Cp
Wif1.2	4.50854252693191e-240	1.02879241553171	0.677	0.031	6.98779006249178e-236	2	Wif1
Nipal1	7.84172398999991e-181	0.574090782975877	0.481	0.013	1.21538880121009e-176	2	Nipal1
Tenm2	2.33167095761773e-175	0.546598472380296	0.425	0.005	3.61385681721171e-171	2	Tenm2
Matn4	3.66148159123609e-175	0.656091305116206	0.472	0.014	5.67493031825682e-171	2	Matn4
Apod.2	2.34367778001517e-172	3.14216342728486	1	0.928	3.63246619124551e-168	2	Apod
Ccl11.2	6.8284055495642e-171	1.25633053083552	0.817	0.154	1.05833457612696e-166	2	Ccl11
Cdkn2a	4.12013930890911e-169	0.656208694953316	0.472	0.016	6.38580391487822e-165	2	Cdkn2a
Serpine2.2	1.99190597645866e-166	1.31806176920741	0.801	0.146	3.08725507291327e-162	2	Serpine2
Col8a1.1	9.8438684378424e-164	1.12384685603981	0.91	0.217	1.52570116918119e-159	2	Col8a1
Tgfbi.1	5.95507340242804e-162	1.46073863526874	0.944	0.342	9.22976826642321e-158	2	Tgfbi
Col2a1	4.08075237190241e-158	0.741110343079927	0.494	0.027	6.32475810121155e-154	2	Col2a1
Cdkn2b	3.685443187085e-156	0.618454515645603	0.5	0.029	5.71206839566305e-152	2	Cdkn2b
Fbn2.1	7.9557579853743e-156	0.862538347761502	0.612	0.064	1.23306293015316e-151	2	Fbn2
Lum.1	4.58758350412487e-148	1.52803246642153	0.988	0.659	7.11029567304313e-144	2	Lum
Col26a1	2.22232370884902e-141	0.526248406907389	0.41	0.016	3.44437951634509e-137	2	Col26a1
Col28a1	1.75073504805805e-138	0.552200608216269	0.478	0.033	2.71346425098517e-134	2	Col28a1
Gpc3.1	5.06035276301388e-138	1.07338659049838	0.885	0.259	7.84304074739521e-134	2	Gpc3
Plxdc1	3.14024422249705e-132	0.379466355430143	0.379	0.013	4.86706452044817e-128	2	Plxdc1
Spp1.2	3.95747318580776e-130	1.89332694665366	0.972	0.545	6.13368769068345e-126	2	Spp1
9130206I24Rik	2.29054252484598e-129	0.494355043131436	0.472	0.037	3.55011185925878e-125	2	9130206I24Rik
A2m	4.07272125910445e-128	0.483943230831308	0.357	0.011	6.31231067948599e-124	2	A2m
Rarres1	9.92019465357141e-125	0.439398618365527	0.36	0.013	1.53753096935703e-120	2	Rarres1
Col11a1	7.30217458620597e-124	0.562361352721967	0.478	0.041	1.13176403911606e-119	2	Col11a1
Ccl2	9.47045495450789e-121	1.32789275734266	0.767	0.199	1.46782581339918e-116	2	Ccl2
Cpe.2	1.03174113800654e-119	0.746299201336675	0.727	0.149	1.59909558979633e-115	2	Cpe
Sox9	1.75460950569156e-113	0.54537843142557	0.45	0.042	2.71946927287135e-109	2	Sox9
Cxadr	3.20636300321001e-113	0.379466355430143	0.323	0.01	4.9695420186752e-109	2	Cxadr
Ccl7	1.10016167678423e-112	0.880715579184075	0.674	0.14	1.70514058284788e-108	2	Ccl7
Trf.1	5.4439147021426e-109	1.70007305047895	0.652	0.153	8.43752339685082e-105	2	Trf
Cspg4	5.81639210826284e-109	0.510832681900314	0.444	0.044	9.01482612859658e-105	2	Cspg4
Hrsp12	9.11665218191332e-109	0.425364125591898	0.388	0.028	1.41298992167475e-104	2	Hrsp12
6030408B16Rik	1.30045940345873e-106	0.366890217295832	0.323	0.014	2.01558202942069e-102	2	6030408B16Rik
Dcn.2	2.11981119635269e-106	0.98980613217077	1	0.842	3.28549537322703e-102	2	Dcn
Timp1.1	3.74925894296219e-106	1.05345245568065	0.857	0.346	5.8109764356971e-102	2	Timp1
Foxd1	1.53939934321745e-100	0.439373002627216	0.398	0.036	2.38591504205273e-96	2	Foxd1
Bmp7	1.8353329274546e-97	0.298178737257124	0.292	0.012	2.84458250426189e-93	2	Bmp7
Aebp1.1	5.61607623588141e-96	0.932622526178528	0.953	0.647	8.7043565579926e-92	2	Aebp1
Ccl9.2	7.05725621699272e-95	0.753644815975151	0.621	0.129	1.0938041410717e-90	2	Ccl9
P2ry14	5.03343673493121e-94	0.330668904681578	0.295	0.014	7.80132359546988e-90	2	P2ry14
Col15a1.2	6.42524554665054e-93	0.929984478638891	0.708	0.206	9.95848807275367e-89	2	Col15a1
Fetub	1.04691391237867e-92	0.369933784558564	0.276	0.011	1.6226118727957e-88	2	Fetub
Crispld1	1.21518034684521e-92	0.434887572729729	0.382	0.037	1.88340801957539e-88	2	Crispld1
Cxx1b	3.84752758733361e-92	0.56006962893471	0.497	0.081	5.96328300760836e-88	2	Cxx1b
Itm2a.1	2.50359629164957e-89	0.706506134379135	0.773	0.239	3.88032389242767e-85	2	Itm2a
Bicc1.1	4.22756118996086e-87	0.866726316464165	0.758	0.26	6.55229708832034e-83	2	Bicc1
Kcnk2	1.57877669330864e-86	0.296325168607801	0.276	0.014	2.44694599695907e-82	2	Kcnk2
Epyc	2.08302191472036e-81	0.999488415854071	0.326	0.031	3.22847566562509e-77	2	Epyc
Matn2.1	1.19878740899032e-79	0.494049074384933	0.575	0.13	1.8580006051941e-75	2	Matn2
Ctsl.1	1.64422359074324e-79	0.885487047689466	0.988	0.823	2.54838214329295e-75	2	Ctsl
Tmsb4x.2	1.37676859202793e-78	-1.15393997773179	0.941	0.987	2.13385364078408e-74	2	Tmsb4x
Pdrg1	4.80923549702808e-78	0.571431361446044	0.478	0.092	7.45383409684383e-74	2	Pdrg1
Ank	3.36897080048488e-77	0.452221390725846	0.447	0.075	5.22156784367152e-73	2	Ank
Rasgrp2	6.16991535315253e-72	0.386754884880105	0.401	0.061	9.56275180585111e-68	2	Rasgrp2
Abca8a.2	9.75497364522307e-72	0.57065618230229	0.571	0.147	1.51192336527312e-67	2	Abca8a
Osr2	1.75610923419165e-70	0.335501659411099	0.314	0.034	2.72179370207364e-66	2	Osr2
Cpxm1.1	4.06228273099843e-70	0.703907315265377	0.68	0.228	6.29613200477447e-66	2	Cpxm1
Sept11.1	1.72577741043521e-69	0.607119041337785	0.724	0.255	2.67478240843353e-65	2	Sept11
Saa1	2.4093390395471e-69	0.361423094890655	0.214	0.009	3.73423457739404e-65	2	Saa1
Cox6c	2.96731544436722e-69	0.666035565448129	0.944	0.732	4.59904220722476e-65	2	Cox6c
Ctsb.2	3.94429173870736e-68	0.449433646462041	0.994	0.864	6.11325776582253e-64	2	Ctsb
Cst6	1.71158164450226e-67	0.256105097091258	0.217	0.011	2.65278039081406e-63	2	Cst6
Enpp2	5.09889358557836e-65	0.349620022666822	0.323	0.042	7.90277516828791e-61	2	Enpp2
Ccnd2.1	5.79971693175783e-65	0.52340751221689	0.543	0.145	8.98898127253146e-61	2	Ccnd2
Fzd2	3.6870756689303e-64	0.421970401267791	0.45	0.096	5.71459857927507e-60	2	Fzd2
Kng2	4.50629380980564e-64	0.460992160204548	0.373	0.061	6.98430477581777e-60	2	Kng2
Smoc2.1	1.12101997000849e-61	0.489920801974974	0.484	0.114	1.73746885151616e-57	2	Smoc2
Tm4sf1.2	3.07153024583238e-59	0.484026902830051	0.696	0.24	4.7605647280156e-55	2	Tm4sf1
Il33.1	3.01926806326794e-58	0.644046595768081	0.547	0.163	4.67956357125897e-54	2	Il33
Tshz3	1.55217832669131e-57	0.311986710223459	0.363	0.065	2.40572118853886e-53	2	Tshz3
Angptl7.1	3.37880606068796e-57	0.85342293353105	0.326	0.053	5.23681151346026e-53	2	Angptl7
Cthrc1.2	1.48887444566014e-56	0.6445197137212	0.795	0.373	2.30760650332865e-52	2	Cthrc1
Nt5e	2.58828907438516e-56	0.318800078626171	0.261	0.03	4.01158923638955e-52	2	Nt5e
Spred1	5.28840022947671e-56	0.419706063450287	0.537	0.159	8.19649151566595e-52	2	Spred1
Prelp.1	7.91778637478511e-56	0.375848812441176	0.565	0.169	1.22717771022794e-51	2	Prelp
Rdh10	9.87410695316087e-56	0.429787976478687	0.357	0.067	1.5303878366704e-51	2	Rdh10
Phlda1.1	1.5062359423656e-55	0.635560478261177	0.587	0.2	2.33451508707245e-51	2	Phlda1
Thy1.1	4.31993476292331e-55	0.655025709408907	0.64	0.255	6.69546688905483e-51	2	Thy1
Reln	5.46348902316124e-55	0.264705770486385	0.267	0.032	8.4678616369976e-51	2	Reln
Steap3	7.65480126792526e-55	0.352819605952438	0.46	0.114	1.18641764851574e-50	2	Steap3
Dusp6.1	1.57507144388059e-54	0.530701162602277	0.469	0.125	2.44120323087052e-50	2	Dusp6
Islr.1	2.07320754105099e-54	0.470213649340803	0.581	0.19	3.21326436787494e-50	2	Islr
Plat.1	2.71811442406707e-54	0.465865886532641	0.587	0.197	4.21280554586155e-50	2	Plat
Sept9	4.09821554069017e-53	0.369937506368182	0.494	0.134	6.3518242665157e-49	2	Sept9
Ptx3	7.92815881320293e-53	0.531494590080892	0.382	0.082	1.22878533445832e-48	2	Ptx3
Trabd2b	3.96472922362472e-52	0.349830258700159	0.429	0.104	6.14493382369596e-48	2	Trabd2b
Efemp1.1	1.20076396699799e-49	0.509200301442931	0.677	0.257	1.86106407245018e-45	2	Efemp1
Tbx18	2.53652744842464e-48	0.257398160036881	0.283	0.045	3.93136389231336e-44	2	Tbx18
Dcbld2	7.63081173588581e-48	0.37942893149315	0.491	0.148	1.18269951094494e-43	2	Dcbld2
Crispld2	1.86545084459352e-47	0.372562787266554	0.366	0.082	2.89126226403549e-43	2	Crispld2
Lxn	6.11778340011788e-46	0.280506658748422	0.339	0.072	9.4819524918427e-42	2	Lxn
H2-D1.2	5.71848357411347e-45	-0.9019547825488	0.401	0.739	8.86307769151847e-41	2	H2-D1
Mmp2.1	7.85814268227728e-45	0.503412036658394	0.873	0.505	1.21793353432616e-40	2	Mmp2
Fn1	1.17387062365447e-44	0.5589167512231	0.991	0.856	1.81938207960206e-40	2	Fn1
Bzw2.1	1.28007995887829e-44	0.382621607329698	0.484	0.152	1.98399592826546e-40	2	Bzw2
Abca9	2.3103722121392e-44	0.267644276734038	0.301	0.058	3.58084589159454e-40	2	Abca9
Oaf.2	4.35627161539828e-44	0.391194460987925	0.584	0.214	6.7517853767058e-40	2	Oaf
Timp3.2	4.98156417822111e-44	0.74270922815421	0.711	0.346	7.7209263198249e-40	2	Timp3
Lama2	5.6994851223694e-44	0.288075211328878	0.342	0.076	8.83363199116034e-40	2	Lama2
Tec	7.99454470342763e-43	0.254119631999669	0.273	0.048	1.23907448358425e-38	2	Tec
Atp8b1	8.44102009969461e-43	0.299670161843794	0.385	0.101	1.30827370525167e-38	2	Atp8b1
Prdx5.1	4.64782548819643e-42	0.402222597030203	0.724	0.341	7.20366472415565e-38	2	Prdx5
Pros1	6.74556715155029e-42	0.320861728647377	0.472	0.15	1.04549545281878e-37	2	Pros1
Itgb3	1.08643369375577e-41	0.290200610641191	0.32	0.07	1.68386358195208e-37	2	Itgb3
Ebf2.1	1.92109482431898e-41	0.333601176166825	0.5	0.164	2.97750486821198e-37	2	Ebf2
Map1lc3a	3.78731979911234e-41	0.335669346172622	0.525	0.182	5.86996695664421e-37	2	Map1lc3a
Tcf4.2	6.23745708338011e-41	0.438516566445308	0.677	0.302	9.66743473353084e-37	2	Tcf4
Cxx1a	9.40238792575134e-40	0.265790083749403	0.27	0.052	1.4572761046122e-35	2	Cxx1a
Crip1.1	1.99387506722217e-39	-0.815414676696966	0.674	0.884	3.09030696668764e-35	2	Crip1
Add3	1.5983165214923e-38	0.378782769671753	0.596	0.242	2.47723077666092e-34	2	Add3
Loxl2.2	1.8234945278695e-38	0.447747507579271	0.658	0.299	2.82623416874494e-34	2	Loxl2
Lmo4	2.26162021471229e-38	0.319017254437368	0.463	0.151	3.50528517078258e-34	2	Lmo4
Ccnd1.1	5.6716443491656e-38	0.415861214815982	0.519	0.187	8.79048157677176e-34	2	Ccnd1
Dio2	1.50535493791411e-37	0.258125283827599	0.161	0.016	2.33314961827308e-33	2	Dio2
Tmem64	1.76323517462637e-37	0.28853832147495	0.37	0.102	2.73283819715341e-33	2	Tmem64
Pkdcc	2.26088698528451e-37	0.308799569834978	0.401	0.122	3.50414873849246e-33	2	Pkdcc
Aldh1a3	4.05151003045294e-37	0.528229645907854	0.267	0.056	6.27943539619902e-33	2	Aldh1a3
Nid1.1	1.51377807416397e-36	0.370993592076361	0.851	0.501	2.34620463714674e-32	2	Nid1
B2m.2	3.32982200341681e-36	-0.714938613456051	0.801	0.924	5.16089112309572e-32	2	B2m
Rgs16	3.83207471385524e-35	0.333783835539692	0.289	0.067	5.93933259900423e-31	2	Rgs16
Ctsh.1	4.931179489039e-35	0.309160210229928	0.525	0.194	7.64283509006155e-31	2	Ctsh
Atp1a2	8.18787524892733e-35	0.361990250002078	0.242	0.047	1.26903878483125e-30	2	Atp1a2
Plod3	1.04939539891457e-34	0.297296513997433	0.438	0.151	1.62645792877769e-30	2	Plod3
Csgalnact1	1.4619769237028e-34	0.270907407706512	0.298	0.074	2.26591803404698e-30	2	Csgalnact1
Actb.1	3.23924187241077e-34	-0.624115190798887	0.997	0.991	5.02050097804945e-30	2	Actb
Entpd2	3.31206892814781e-34	0.308879655087063	0.401	0.128	5.13337563173629e-30	2	Entpd2
Thbs1	4.87954922651569e-34	0.364771382889864	0.46	0.164	7.56281334617666e-30	2	Thbs1
Sdc2.1	1.03028420231944e-33	0.320285513038154	0.466	0.171	1.5968374851749e-29	2	Sdc2
Has2	9.50071509628774e-33	0.275458448519973	0.239	0.05	1.47251583277364e-28	2	Has2
Vcan.2	1.10990698153477e-32	0.318657268600665	0.593	0.247	1.72024483068073e-28	2	Vcan
Ly6a.1	1.6899564643682e-32	-0.892512692909653	0.385	0.663	2.61926352412428e-28	2	Ly6a
Il6st.1	1.1251631111931e-31	0.440847076392413	0.705	0.383	1.74389030603819e-27	2	Il6st
Pcdhga9.1	1.85447431469628e-31	0.291646597792481	0.488	0.191	2.87424974034777e-27	2	Pcdhga9
Nr2f2.1	3.9758512142787e-31	0.349177870736537	0.503	0.205	6.16217179701055e-27	2	Nr2f2
Mmp19	5.1071017607356e-31	0.268056800241115	0.382	0.125	7.91549701896411e-27	2	Mmp19
Tgm2	4.16416118597767e-30	0.282523633901193	0.463	0.174	6.45403342214678e-26	2	Tgm2
Gas7	4.21810706410716e-30	0.26099973401537	0.503	0.195	6.53764413865969e-26	2	Gas7
RP23-103I12.13.2	8.79843565235421e-30	0.327234570033787	0.556	0.242	1.36366954175838e-25	2	RP23-103I12.13
Rcn1.2	9.69553693459927e-30	0.308171682654642	0.612	0.284	1.50271126949354e-25	2	Rcn1
Lamc1.1	1.2639920921844e-29	0.310352522072797	0.497	0.209	1.9590613436766e-25	2	Lamc1
Pdpn	1.61869787900423e-29	0.29329294345546	0.416	0.151	2.50881984266866e-25	2	Pdpn
Htra1.1	3.16567002318308e-29	0.347137682545975	0.5	0.213	4.90647196893146e-25	2	Htra1
Col6a1.1	7.61242374312877e-29	0.427530368009882	0.745	0.46	1.17984955594753e-24	2	Col6a1
Maged2.1	1.00814062773061e-28	0.289764851534118	0.525	0.223	1.56251715891967e-24	2	Maged2
H2-K1.2	1.92044166482515e-28	-0.633360066412193	0.342	0.634	2.9764925363125e-24	2	H2-K1
Ly6c1.1	3.17520180986355e-28	-0.742343381142887	0.071	0.38	4.92124528510752e-24	2	Ly6c1
Lgals1.2	1.11200434102882e-27	0.356435724065191	0.997	0.912	1.72349552816056e-23	2	Lgals1
Pttg1ip	3.95053262511915e-27	0.254246770245078	0.422	0.162	6.12293051567217e-23	2	Pttg1ip
Pdia6.2	4.29785491690344e-27	0.356005823806708	0.773	0.474	6.66124533570864e-23	2	Pdia6
Mgp.1	6.22337309424045e-27	0.523858120149074	0.711	0.433	9.64560595876327e-23	2	Mgp
Pdia4	7.54464202608329e-27	0.251201412221204	0.497	0.214	1.16934406762265e-22	2	Pdia4
Akap12.1	1.25853254143164e-26	0.291287374577844	0.416	0.16	1.95059958596491e-22	2	Akap12
S1pr3	8.30557759156465e-26	0.256287795547964	0.276	0.081	1.28728147091661e-21	2	S1pr3
Rpl22l1.1	1.13921721009216e-25	0.375260412931066	0.705	0.446	1.76567275392184e-21	2	Rpl22l1
Saa3	1.94204421593777e-25	0.527651689271294	0.208	0.048	3.00997433028195e-21	2	Saa3
Dpt.1	3.23452712411143e-25	-0.750354237405963	0.034	0.313	5.0131935896603e-21	2	Dpt
Cd63.1	4.481072382279e-25	0.30020010097822	0.891	0.66	6.94521408529422e-21	2	Cd63
Itm2b.1	1.34432787384135e-24	-0.458093548010315	0.68	0.832	2.08357377166671e-20	2	Itm2b
Rcn3.2	1.57860240253114e-24	0.301373628153643	0.727	0.395	2.44667586368301e-20	2	Rcn3
Ptrf.1	2.54027713913738e-24	0.359052547606524	0.854	0.642	3.93717553794902e-20	2	Ptrf
Emp1	3.7838255904847e-24	0.349268448582082	0.72	0.459	5.86455128269224e-20	2	Emp1
Pabpc1	4.3747515150782e-24	0.337973637384125	1	0.97	6.78042737321971e-20	2	Pabpc1
Tmed3	1.02959751062413e-23	0.281044922384486	0.578	0.291	1.59577318171634e-19	2	Tmed3
Ostc.1	2.5065424702425e-23	0.2837141186349	0.537	0.265	3.88489017462886e-19	2	Ostc
Golim4.1	2.70450184005891e-23	0.263163309247532	0.45	0.198	4.19170740190731e-19	2	Golim4
mt-Rnr2	2.74876432773128e-23	-0.439815085605003	0.994	0.991	4.26030983155072e-19	2	mt-Rnr2
Nfib.1	4.41513648497359e-23	-0.513693795781979	0.134	0.404	6.84302003806057e-19	2	Nfib
Trib1	5.24088437611231e-23	0.258486444265246	0.255	0.076	8.12284669453647e-19	2	Trib1
Prrx1.2	7.53786579499346e-23	-0.495227306293824	0.087	0.358	1.16829381956604e-18	2	Prrx1
Gpx8.1	7.94416124564874e-23	0.267719529772415	0.509	0.245	1.2312655514631e-18	2	Gpx8
Lamb1.1	8.84997122266145e-23	0.282626324249639	0.491	0.23	1.3716570398003e-18	2	Lamb1
Aspn.2	2.43790475998422e-22	-0.545725454714643	0.04	0.298	3.77850858749955e-18	2	Aspn
Dap	5.05034085095418e-22	0.286619770865016	0.475	0.227	7.82752328489389e-18	2	Dap
Postn.2	5.37281433915147e-22	-0.735486235336779	0.326	0.566	8.32732494425087e-18	2	Postn
Maged1.2	5.51683869749159e-22	0.260061870448394	0.559	0.28	8.55054829724221e-18	2	Maged1
Psip1	8.66204681214189e-22	0.254563444831256	0.401	0.169	1.34253063541387e-17	2	Psip1
S100a4.2	9.0112882713256e-22	-0.751846288733576	0.134	0.391	1.39665956917275e-17	2	S100a4
Gpx3.2	1.33213736709706e-21	-0.509834668004282	0.012	0.249	2.06467970526373e-17	2	Gpx3
Ccdc80.1	2.88453907768342e-21	-0.686869931297311	0.168	0.411	4.47074711650154e-17	2	Ccdc80
Csrp2.2	5.94599050566309e-21	-0.385228651782019	0.04	0.286	9.21569068472722e-17	2	Csrp2
Lrrc58	8.19925959341512e-21	-0.47376290615833	0.506	0.708	1.27080324438341e-16	2	Lrrc58
Swi5.1	2.15689842343435e-20	0.284238916443014	0.621	0.364	3.34297686648089e-16	2	Swi5
Tagln2	2.95826767657056e-20	-0.439207575636835	0.211	0.459	4.58501907191671e-16	2	Tagln2
Nfkbia.1	1.12072083658451e-19	-0.706580642604639	0.165	0.409	1.73700522462233e-15	2	Nfkbia
Nr4a1	1.23499430818639e-19	0.316389458041509	0.398	0.179	1.91411767825808e-15	2	Nr4a1
Col6a2.1	1.49651205421561e-19	0.299298408937107	0.72	0.442	2.31944403282878e-15	2	Col6a2
Clec3b.2	6.02536082602507e-19	-0.69576600217202	0.043	0.265	9.33870674425625e-15	2	Clec3b
Calr.1	2.66735893270703e-18	0.284000634989215	0.941	0.822	4.13413960980262e-14	2	Calr
Ablim1.1	3.5052442117358e-18	-0.308790747061769	0.016	0.222	5.43277800376931e-14	2	Ablim1
Gnas.2	6.02313905624678e-18	-0.577779441852609	0.835	0.895	9.33526322327689e-14	2	Gnas
Rps9	7.8756300605133e-18	-0.343191511374128	0.947	0.968	1.22064390307896e-13	2	Rps9
S100a6.2	9.46250685167362e-18	0.270133101926233	1	0.964	1.46659393694089e-13	2	S100a6
Itih5.1	1.09676956070197e-17	-0.366288909375143	0.022	0.228	1.69988314213198e-13	2	Itih5
App	1.56370362567531e-17	0.256349080947962	0.901	0.735	2.42358424943416e-13	2	App
Lsp1.2	4.31695847659611e-17	-0.566965159575069	0.168	0.383	6.69085394287631e-13	2	Lsp1
Hspg2.1	8.10383253242312e-17	0.292002665441424	0.534	0.308	1.25601300420026e-12	2	Hspg2
Srgn.2	1.02868259933606e-16	-0.633407172896409	0.059	0.266	1.59435516071096e-12	2	Srgn
Fcer1g.2	1.57328552374138e-16	-0.426657954259804	0.006	0.19	2.43843523324676e-12	2	Fcer1g
Lox.2	2.18159976492015e-16	-0.642985952615327	0.124	0.335	3.38126147564974e-12	2	Lox
Fbln2.1	2.43532045147318e-16	-0.504604455760799	0.233	0.443	3.77450316773828e-12	2	Fbln2
Filip1l.1	6.90039457359959e-16	-0.41713516108422	0.071	0.279	1.0694921549622e-11	2	Filip1l
Tyrobp.2	1.31134697362659e-15	-0.492967216967293	0.025	0.207	2.03245667442386e-11	2	Tyrobp
Mbnl1	1.45809982015343e-15	-0.305324001034174	0.112	0.329	2.2599089112558e-11	2	Mbnl1
Pmepa1.2	1.637630661049e-15	-0.347353137306514	0.065	0.265	2.53816376155985e-11	2	Pmepa1
Cfl1	1.70458969178033e-15	-0.356516785896899	0.522	0.672	2.64194356329034e-11	2	Cfl1
Gas1	3.25496727270553e-15	-0.280768393165605	0.031	0.216	5.04487377596629e-11	2	Gas1
Laptm5.2	3.70703844942538e-15	-0.390412626766961	0.006	0.177	5.74553889276439e-11	2	Laptm5
Nfix.2	7.1116540285328e-15	-0.30070520130133	0.09	0.291	1.1022352578823e-10	2	Nfix
Fndc1.1	1.41537433667633e-14	-0.353057547687185	0.028	0.205	2.19368868441464e-10	2	Fndc1
Cd36.1	1.70925516160032e-14	-0.546972175740519	0.016	0.183	2.64917457496434e-10	2	Cd36
Ctss.2	2.58541267955097e-14	-0.854572183400041	0.031	0.203	4.00713111203605e-10	2	Ctss
Ly6e	4.66307810593925e-14	-0.41976418057102	0.205	0.405	7.22730475639524e-10	2	Ly6e
Thbs2.2	9.34987313133335e-14	-0.414150346296888	0.124	0.313	1.44913683662536e-09	2	Thbs2
Cd200.1	1.22924487312951e-13	-0.290424587551551	0.04	0.214	1.90520662886343e-09	2	Cd200
Msn	1.23577766266696e-13	-0.350529593871753	0.202	0.392	1.91533179936751e-09	2	Msn
Htra3.1	1.5659647738667e-13	-0.422917234886871	0.068	0.244	2.427088803016e-09	2	Htra3
Mndal	1.82183387071845e-13	-0.310166241096912	0.075	0.257	2.82366031622652e-09	2	Mndal
Pdlim1	2.73867059856553e-13	-0.264795510507042	0.028	0.191	4.24466556071671e-09	2	Pdlim1
Ier2	3.73282368825998e-13	0.252667091174247	0.559	0.362	5.78550343443414e-09	2	Ier2
Psap.2	7.52744510293931e-13	-0.608890436097124	0.416	0.573	1.16667871650456e-08	2	Psap
Igfbp5.1	7.83939340950581e-13	0.380491655458591	0.748	0.589	1.2150275845393e-08	2	Igfbp5
Adamts5.1	9.03598574307428e-13	-0.294838977062548	0.037	0.2	1.40048743031908e-08	2	Adamts5
Dkk2.1	9.47573613517831e-13	-0.345742461925658	0.006	0.151	1.46864434359129e-08	2	Dkk2
Zeb2.2	1.89617230916089e-12	-0.371128481581355	0.155	0.334	2.93887746196846e-08	2	Zeb2
Sdpr.2	1.99553020839933e-12	-0.465362413299243	0.034	0.189	3.09287226999811e-08	2	Sdpr
Fxyd5.2	5.22818418787245e-12	-0.361813575955145	0.165	0.338	8.10316267278352e-08	2	Fxyd5
Pfn1	5.61666475114232e-12	-0.304290375825058	0.674	0.774	8.70526869779548e-08	2	Pfn1
Col12a1.2	6.20387818972293e-12	-0.274340455514207	0.019	0.163	9.61539080625157e-08	2	Col12a1
Ly6c2	8.07774259291988e-12	-0.262107887078572	0.016	0.157	1.25196932447665e-07	2	Ly6c2
Cybb.2	9.4906880121017e-12	-0.436290729670416	0.016	0.154	1.47096173499564e-07	2	Cybb
Fabp5.1	1.12172033171677e-11	-0.300793981962424	0.016	0.156	1.73855434212783e-07	2	Fabp5
Ifi27l2a.1	1.70291144824037e-11	-0.339541401008115	0.037	0.186	2.63934245362775e-07	2	Ifi27l2a
Sema3c.1	1.8612122462111e-11	-0.303658996239736	0.04	0.192	2.88469286040258e-07	2	Sema3c
Cd52.2	2.28266426933518e-11	-0.366916706146834	0.012	0.146	3.5379013510426e-07	2	Cd52
Ehd4.1	2.84877239262549e-11	-0.379253643944712	0.056	0.207	4.41531233133025e-07	2	Ehd4
Fabp4.1	2.89891290315528e-11	-1.42848236757485	0.134	0.295	4.49302510860037e-07	2	Fabp4
Txnip.1	4.29927869947302e-11	-0.30585449674804	0.112	0.272	6.66345205631323e-07	2	Txnip
Rps11	4.63595838479763e-11	-0.290971820286818	0.699	0.788	7.18527190059784e-07	2	Rps11
Lyz2.2	4.7968159784481e-11	-1.50139966443195	0.186	0.345	7.43458508499671e-07	2	Lyz2
Sfrp2.1	5.32901871796388e-11	-0.375405382051012	0.019	0.152	8.25944611097222e-07	2	Sfrp2
Rps14	6.23234648550597e-11	-0.266606028881442	0.963	0.963	9.65951381788571e-07	2	Rps14
Cd14.2	6.75587508844725e-11	-0.366597746173606	0.009	0.135	1.04709307995844e-06	2	Cd14
Coro1a.2	6.85406717694826e-11	-0.258707659885401	0.006	0.13	1.06231187175521e-06	2	Coro1a
Ccr2.2	7.33897426204928e-11	-0.48506148682986	0.006	0.129	1.13746762087502e-06	2	Ccr2
Gas6.1	7.54421395827477e-11	-0.354297403571894	0.05	0.197	1.16927772139301e-06	2	Gas6
Mfap4	8.58864708317467e-11	-0.251293705340403	0.003	0.124	1.33115441142124e-06	2	Mfap4
Gpr116.2	1.10575955925737e-10	-0.329231820551954	0.016	0.143	1.71381674089299e-06	2	Gpr116
Fbln1.1	1.19351177744542e-10	-0.275398816665312	0.047	0.189	1.84982390386265e-06	2	Fbln1
Atp2b1.1	1.33829513957489e-10	-0.345467799529791	0.205	0.371	2.07422363682711e-06	2	Atp2b1
Ccl6.2	1.77382376788304e-10	-0.533586820489269	0.028	0.159	2.74924945784192e-06	2	Ccl6
Cilp.2	2.26508578853732e-10	-0.3855291727728	0.022	0.149	3.51065646365399e-06	2	Cilp
Mgst1	2.55422879370058e-10	-0.253040395718117	0.112	0.269	3.95879920735653e-06	2	Mgst1
Col14a1.2	5.55853594520365e-10	-0.48131369284716	0.23	0.367	8.61517486147114e-06	2	Col14a1
Gdf10.1	5.57252992584753e-10	-0.284249638145652	0.016	0.135	8.63686413207108e-06	2	Gdf10
Ppap2b.1	7.28551429203194e-10	-0.393813041672265	0.193	0.354	1.12918186012203e-05	2	Ppap2b
H2-Aa.2	8.55445768803446e-10	-0.849206117847006	0.019	0.137	1.32585539706846e-05	2	H2-Aa
Plac8	9.21959787691336e-10	-0.349266758319161	0.071	0.21	1.4289454749428e-05	2	Plac8
Mpeg1.2	1.36020226653328e-09	-0.379586154018224	0.037	0.161	2.10817749289993e-05	2	Mpeg1
Ptprc.2	1.65440133831205e-09	-0.268802466676843	0.009	0.119	2.56415663424985e-05	2	Ptprc
Gpx1.2	1.86654873829693e-09	-0.414574427454718	0.602	0.694	2.89296388948641e-05	2	Gpx1
Ptma	2.03090378833246e-09	-0.281231094320331	0.276	0.42	3.14769778153647e-05	2	Ptma
Sfrp4.1	3.05715204681429e-09	-0.946358193269429	0.174	0.312	4.73827995735747e-05	2	Sfrp4
Penk.2	4.50704041178387e-09	-0.334698872084826	0.047	0.171	6.98546193422383e-05	2	Penk
Lpl.1	7.55660773929172e-09	-0.551325139532672	0.13	0.269	0.000117119863351282	2	Lpl
Pecam1.2	9.60702306547178e-09	-0.28502573442054	0.016	0.12	0.000148899250491747	2	Pecam1
Ptn.1	1.05271942309114e-08	-0.309712341859965	0.037	0.152	0.000163160983384896	2	Ptn
Angptl1.2	1.06569847297876e-08	-0.275579133384127	0.028	0.139	0.000165172606326978	2	Angptl1
Neat1.2	1.17831199536899e-08	-0.292773039471548	0.189	0.334	0.00018262657616224	2	Neat1
Ctla2a.2	1.18625339442733e-08	-0.532780514862603	0.065	0.189	0.000183857413602292	2	Ctla2a
C4b.1	1.26499378038507e-08	-0.315612191440738	0.059	0.18	0.000196061386021882	2	C4b
Flt1.1	1.47380868571139e-08	-0.256695991534498	0.006	0.103	0.000228425608198408	2	Flt1
Ncl.1	1.53570864522961e-08	-0.278277468473546	0.602	0.724	0.000238019482924137	2	Ncl
Mfap5.2	1.92255490677513e-08	-0.504706589834752	0.32	0.423	0.000297976785001078	2	Mfap5
Klf2.2	3.75647862968643e-08	-0.363907390913892	0.158	0.296	0.0005822166228151	2	Klf2
Cxcl2.2	4.06688427436332e-08	-0.915749646246453	0.047	0.158	0.000630326393683571	2	Cxcl2
Cd74.2	4.11054456312611e-08	-1.23694789727103	0.059	0.172	0.000637093301838916	2	Cd74
Ctsd.2	4.23174079215375e-08	-0.690218841383228	0.273	0.403	0.000655877505375909	2	Ctsd
Nrp1	4.39097716554303e-08	-0.35170334990839	0.342	0.454	0.000680557550887513	2	Nrp1
Gatm.2	4.46924229164431e-08	-0.273255352322943	0.025	0.127	0.000692687862781952	2	Gatm
Maf.1	5.03250523003915e-08	-0.279705761211404	0.112	0.239	0.000779987985603767	2	Maf
Tagln.1	9.06894620085267e-08	-0.357597358680778	0.016	0.11	0.00140559597167016	2	Tagln
Egfl7.2	1.08838147992484e-07	-0.319972904849676	0.04	0.144	0.00168688245573551	2	Egfl7
Mgll.2	1.18677267642773e-07	-0.251163913559886	0.043	0.15	0.00183937897119534	2	Mgll
Aqp1.1	2.04832915396731e-07	-0.474888459116809	0.056	0.163	0.00317470535573393	2	Aqp1
Lgals3.1	2.21655144328815e-07	-0.541007179932451	0.239	0.354	0.00343543308195231	2	Lgals3
Acta2.1	2.65985220623718e-07	-0.587431439671928	0.037	0.138	0.004122504934447	2	Acta2
Ifitm3	2.86994434328175e-07	-0.324590489513691	0.845	0.859	0.00444812673765239	2	Ifitm3
Mmp3.1	2.94013208786383e-07	-0.256569898241209	0.016	0.104	0.00455691072298015	2	Mmp3
Apoe.2	3.98212941038777e-07	-1.31916993828483	0.556	0.624	0.00617190237316	2	Apoe
Gpnmb.2	4.06671382251705e-07	-0.44305846352518	0.034	0.13	0.00630299975351918	2	Gpnmb
Wfdc17.2	9.67758081227144e-07	-0.304570421495874	0.025	0.111	0.0149992825009395	2	Wfdc17
Nov.1	1.04270680974789e-06	-0.260704577004963	0.043	0.138	0.0161609128442825	2	Nov
Lrg1.2	1.46716013696783e-06	-0.369050256922496	0.034	0.123	0.0227395149628643	2	Lrg1
H2-Ab1.2	1.69265347837033e-06	-0.788094339059286	0.047	0.138	0.0262344362612618	2	H2-Ab1
Anp32b	3.02680832403683e-06	-0.250242903935146	0.335	0.441	0.0469125022142469	2	Anp32b
Plvap.2	4.64220390889911e-06	-0.389186137136088	0.047	0.132	0.0719495183840272	2	Plvap
mt-Rnr1.1	1.38553997759852e-05	-0.253175218490445	0.425	0.552	0.214744841127995	2	mt-Rnr1
Lgmn.2	2.09163731020913e-05	-0.356353607175042	0.227	0.322	0.324182866709313	2	Lgmn
Gsn.2	2.74306112079425e-05	-0.531704458785802	0.842	0.688	0.4251470431119	2	Gsn
Cst3.2	8.18609156973852e-05	-0.507378536971323	0.826	0.79	1	2	Cst3
Cd248.1	8.4874546086796e-05	-0.257433041324917	0.174	0.259	1	2	Cd248
Myl9.1	0.000185464675028953	-0.330690372746225	0.068	0.141	1	2	Myl9
Mest.2	0.000562244203792228	-0.251508919600914	0.081	0.147	1	2	Mest
Timp2.1	0.000995730930260253	-0.293319098054761	0.578	0.596	1	2	Timp2
Mcl1.2	0.00114327555813548	-0.251722554805792	0.289	0.35	1	2	Mcl1
Sfrp1.2	0.00118484587358735	-0.279855636202317	0.09	0.152	1	2	Sfrp1
C3.2	0.00251165206555793	-0.639535181972503	0.264	0.305	1	2	C3
Cxcl14.2	0.00350303190966735	-0.427355756212059	0.112	0.167	1	2	Cxcl14
Clec3b.3	1.74803602186401e-210	1.46753967608777	0.917	0.135	2.70928103028703e-206	3	Clec3b
Dpt.2	9.68835513832526e-182	1.48993932946321	0.91	0.182	1.50159816288903e-177	3	Dpt
C3.3	2.94253601960582e-169	1.76698637776057	0.906	0.213	4.56063657678706e-165	3	C3
Htra3.2	6.24551389167452e-145	1.0827043095902	0.77	0.14	9.67992198070634e-141	3	Htra3
Pi16.2	1.20277611182402e-139	1.59153602084068	0.741	0.14	1.86418269571605e-135	3	Pi16
Fndc1.2	1.92176411472369e-132	0.944036545317762	0.683	0.108	2.97854220141024e-128	3	Fndc1
Gsn.3	4.05356470931926e-129	1.67027172760118	0.989	0.67	6.28261994297392e-125	3	Gsn
C4b.2	7.34366528691139e-125	0.954975745942213	0.633	0.096	1.1381946828184e-120	3	C4b
Pcolce2	4.18576884479675e-114	0.539516684943747	0.478	0.046	6.48752313255048e-110	3	Pcolce2
Gfpt2	1.00728148157243e-106	0.690909647089907	0.554	0.083	1.56118556828911e-102	3	Gfpt2
Sema3c.2	9.64860086135776e-106	0.882488083390141	0.608	0.108	1.49543664750184e-101	3	Sema3c
Ly6a.2	2.4011091966868e-105	1.1531450833945	0.968	0.573	3.72147914394487e-101	3	Ly6a
Smpd3	3.7371746571109e-105	0.529844367898406	0.32	0.013	5.79224700105618e-101	3	Smpd3
Ly6c1.2	9.9440348307807e-105	0.975645559480977	0.845	0.263	1.5412259584227e-100	3	Ly6c1
Cd248.2	3.95317994464017e-104	0.875581141108304	0.723	0.179	6.1270335961978e-100	3	Cd248
Col14a1.3	9.20833447131352e-102	0.959465856995581	0.853	0.275	1.42719975970888e-97	3	Col14a1
Fbn1.2	7.58097210334147e-101	1.29280042289665	0.968	0.63	1.17497486629689e-96	3	Fbn1
Cd55	2.78075649172678e-99	0.567074932844072	0.432	0.044	4.30989448652734e-95	3	Cd55
C1s.1	1.11964672415203e-95	0.917467320946715	0.831	0.283	1.73534045776324e-91	3	C1s
Scara5.1	1.58750022930145e-95	0.697358260250229	0.655	0.139	2.46046660539431e-91	3	Scara5
Lrrn4cl	7.92728661647427e-94	0.589047687250039	0.453	0.056	1.22865015268735e-89	3	Lrrn4cl
Adamts5.2	3.85675078108842e-93	0.728713648193168	0.601	0.116	5.97757803560894e-89	3	Adamts5
Tnxb.1	2.02727779078786e-92	0.704706018339851	0.683	0.157	3.14207784794211e-88	3	Tnxb
Fstl1.2	1.10468745085095e-86	0.946810811883515	1	0.82	1.71215508007389e-82	3	Fstl1
Dkk2.2	6.74489296475571e-86	0.779381937550328	0.493	0.079	1.04539096060749e-81	3	Dkk2
Sfrp2.2	1.64805988540625e-85	0.775645911764417	0.5	0.081	2.55432801639114e-81	3	Sfrp2
C1ra.1	1.43028445930998e-83	0.737794833224935	0.683	0.188	2.21679788348454e-79	3	C1ra
Cxcl13	1.02104999290921e-82	0.448981238648077	0.219	0.005	1.58252538400998e-78	3	Cxcl13
Dpp4	2.26362515090255e-82	0.581633625244317	0.41	0.052	3.50839262138387e-78	3	Dpp4
Mfap5.3	3.46224956290392e-82	1.00975382850908	0.842	0.347	5.36614059754478e-78	3	Mfap5
Cd34.1	1.08120580695525e-81	0.785944245556981	0.788	0.288	1.67576088019994e-77	3	Cd34
Timp2.2	3.72320993658849e-81	0.919162578840591	0.939	0.544	5.77060308071849e-77	3	Timp2
Ppap2b.2	9.8039028410763e-81	0.922888728630307	0.77	0.268	1.51950690133842e-76	3	Ppap2b
Tmem100	1.08643803554004e-80	0.60343287407783	0.482	0.079	1.6838703112835e-76	3	Tmem100
Ccdc80.2	4.3520249366653e-80	0.939759730393571	0.82	0.312	6.74520344933755e-76	3	Ccdc80
Nova1	2.93919915597483e-78	0.40694281324228	0.378	0.045	4.55546477184539e-74	3	Nova1
Tmeff2	6.04283119307889e-77	0.39050175905089	0.363	0.041	9.36578406615297e-73	3	Tmeff2
Efemp1.2	3.2367188114392e-76	0.780086594782814	0.759	0.255	5.01659048584962e-72	3	Efemp1
Lpl.2	6.77664031945431e-70	1.1526587620819	0.655	0.191	1.05031148311222e-65	3	Lpl
Igfbp4.1	9.81979669996131e-69	0.853244242210391	0.968	0.695	1.521970290527e-64	3	Igfbp4
1700019D03Rik	2.10556618359535e-68	0.279564793151375	0.227	0.012	3.26341702795443e-64	3	1700019D03Rik
Col3a1.2	3.14033483744036e-68	0.934792276748064	0.996	0.912	4.86720496454881e-64	3	Col3a1
Rnase4.1	4.6142992210045e-67	0.79130296450921	0.867	0.486	7.15170236263487e-63	3	Rnase4
Serping1.1	6.42906298442832e-66	0.816963972736017	0.867	0.443	9.96440471956546e-62	3	Serping1
Gpx3.3	1.05086424757266e-65	0.777292108937391	0.594	0.161	1.62873449731286e-61	3	Gpx3
Zbtb20.1	2.57048479267577e-64	0.699651603665899	0.824	0.36	3.98399438016818e-60	3	Zbtb20
Nid1.2	3.84463629850236e-64	0.783271556695821	0.86	0.507	5.95880179904881e-60	3	Nid1
Cadm3	1.0554424902053e-62	0.370158321533553	0.345	0.049	1.6358303155692e-58	3	Cadm3
Loxl1.1	3.61100713869598e-62	0.559277177926262	0.633	0.199	5.5966999642649e-58	3	Loxl1
Lsp1.3	3.80435914208761e-62	0.792713320249962	0.745	0.296	5.89637623432159e-58	3	Lsp1
Scara3	2.5720965816606e-61	0.425422753703098	0.399	0.072	3.98649249191577e-57	3	Scara3
Gpr133	5.28944929210013e-60	0.356078320073918	0.378	0.063	8.19811745782599e-56	3	Gpr133
Bmp1.1	9.72684285019888e-58	0.516217946630232	0.586	0.181	1.50756337335232e-53	3	Bmp1
Emilin2	5.04263012309633e-57	0.545039152110702	0.568	0.169	7.815572427787e-53	3	Emilin2
Pcsk6	1.65292978640026e-55	0.253508253049995	0.216	0.016	2.56187587594176e-51	3	Pcsk6
Rarres2.1	3.89934650183532e-55	0.60887649289934	0.698	0.258	6.04359714319456e-51	3	Rarres2
Il11ra1.1	3.95150027411619e-55	0.532587597460815	0.536	0.149	6.12443027485269e-51	3	Il11ra1
Itih5.2	4.89707791516945e-54	0.481998925896322	0.543	0.149	7.58998106072114e-50	3	Itih5
Mmp2.2	5.43559792384369e-54	0.679534643705353	0.867	0.514	8.42463322216534e-50	3	Mmp2
Axl	7.99021146282823e-54	0.556587782887394	0.619	0.218	1.23840287462375e-49	3	Axl
Ackr3	2.44940647989778e-53	0.561038668527438	0.471	0.122	3.79633510319357e-49	3	Ackr3
Marcks.1	3.09588290502186e-53	0.670997801547526	0.95	0.75	4.79830891449338e-49	3	Marcks
Dcn.3	5.23276387225302e-53	0.559454409221968	1	0.846	8.11026072560495e-49	3	Dcn
Ogn.1	5.99932007576292e-53	0.596430559647045	0.788	0.353	9.29834618542495e-49	3	Ogn
Mgst1.1	1.12024872924949e-51	0.483163748392615	0.601	0.196	1.73627350546379e-47	3	Mgst1
Fn1.1	4.6731566762298e-49	0.677019650547931	0.993	0.859	7.24292553248856e-45	3	Fn1
Gm5077	6.66805527433706e-49	0.396644537765147	0.417	0.099	1.0334818869695e-44	3	Gm5077
Ltbp1	1.1317043106106e-48	0.459546414521473	0.46	0.126	1.75402851101536e-44	3	Ltbp1
Antxr1	3.8827903207326e-48	0.400892465599732	0.471	0.126	6.01793671810346e-44	3	Antxr1
Qpct	4.84741401332674e-48	0.274706655218162	0.266	0.037	7.51300697925511e-44	3	Qpct
Dpep1	6.6935982215816e-48	0.363979013647714	0.385	0.082	1.03744078836293e-43	3	Dpep1
Ace	2.05615743160832e-47	0.401573111716221	0.374	0.079	3.18683840324973e-43	3	Ace
Islr.2	2.35389079994918e-47	0.455750534565618	0.59	0.197	3.64829535084123e-43	3	Islr
Igf1.2	4.74026384871194e-47	0.766160926609171	0.788	0.443	7.34693493911864e-43	3	Igf1
Sod3.1	9.29855713954181e-47	0.509961941547339	0.608	0.226	1.44118337105759e-42	3	Sod3
Tppp3	1.74927289489295e-45	0.469874516273932	0.565	0.195	2.71119805979459e-41	3	Tppp3
Sbsn	1.92505739104342e-43	0.35586404748905	0.281	0.048	2.98364645037819e-39	3	Sbsn
Ebf1.1	2.14700350750209e-43	0.520413311369093	0.622	0.252	3.32764073627749e-39	3	Ebf1
Sfrp4.2	6.93240541250192e-43	0.386574660395342	0.64	0.242	1.07445351488367e-38	3	Sfrp4
Heg1.1	1.10810572984917e-42	0.449207154885127	0.532	0.183	1.71745307069323e-38	3	Heg1
Fst	1.22020782088143e-42	0.469301264199303	0.385	0.095	1.89120010158412e-38	3	Fst
Plau	7.2229586716769e-42	0.361959889583191	0.324	0.069	1.1194863645232e-37	3	Plau
Ugdh.1	1.86473994753286e-41	0.623450052920842	0.543	0.2	2.89016044468118e-37	3	Ugdh
Fbln1.2	1.04392383953099e-40	0.367145404247205	0.45	0.129	1.61797755888908e-36	3	Fbln1
Procr	1.18901385254488e-40	0.490455223973953	0.428	0.125	1.8428525700593e-36	3	Procr
Prrx1.3	2.09315984003595e-40	0.489559576223997	0.662	0.27	3.24418843607171e-36	3	Prrx1
Uap1	6.57957358947836e-40	0.446970895019449	0.399	0.111	1.01976811063325e-35	3	Uap1
Man1a	8.91804553969423e-40	0.438908739388574	0.457	0.147	1.38220787819721e-35	3	Man1a
Igfbp5.2	6.86540785281795e-39	0.922587761602626	0.838	0.58	1.06406956310825e-34	3	Igfbp5
Col1a2.2	4.03493719240782e-38	0.41597602674857	1	0.898	6.25374915451288e-34	3	Col1a2
Mmp3.2	4.52862462265801e-38	0.444994511975142	0.299	0.062	7.01891530265765e-34	3	Mmp3
Igfbp6.1	2.20934832367242e-37	0.420075877512227	0.809	0.463	3.42426896685988e-33	3	Igfbp6
Klhl13	8.84206373528298e-37	0.300936928939454	0.309	0.07	1.37043145833151e-32	3	Klhl13
Antxr2	8.9474205463543e-37	0.318910529746715	0.335	0.082	1.38676071047945e-32	3	Antxr2
Cfb	2.27452550729229e-36	0.323078333045542	0.327	0.077	3.52528708375232e-32	3	Cfb
Slc4a4	8.99600037111217e-36	0.27245268125574	0.263	0.052	1.39429009751867e-31	3	Slc4a4
Serpinb6a.1	1.108184096791e-35	0.526946911822955	0.741	0.444	1.71757453161638e-31	3	Serpinb6a
Prss23.1	2.0635609729202e-35	0.39306926165692	0.41	0.124	3.19831315192901e-31	3	Prss23
Pla1a	2.25049485244907e-35	0.276501423262197	0.223	0.036	3.48804197181082e-31	3	Pla1a
Pdgfra.1	4.41130326588398e-35	0.395490728298532	0.504	0.188	6.83707893179358e-31	3	Pdgfra
Lrrc17.1	6.27079225692398e-35	0.342183796321079	0.432	0.137	9.71910091900647e-31	3	Lrrc17
Figf	8.01173677228464e-34	0.265992039038046	0.252	0.05	1.2417390823364e-29	3	Figf
Adam33	1.38980936605148e-33	0.260730508461413	0.27	0.057	2.15406553644319e-29	3	Adam33
Csf1	1.84809519049751e-33	0.347638698560399	0.424	0.14	2.86436273575209e-29	3	Csf1
Ecm1	5.16650502817839e-32	0.470507730833046	0.55	0.246	8.00756614317368e-28	3	Ecm1
Postn.3	6.06546023559382e-32	0.432157107512291	0.802	0.493	9.40085681914686e-28	3	Postn
Fap.1	3.54279626628642e-31	0.354114658207592	0.421	0.147	5.49097993311732e-27	3	Fap
Nsg1	3.86365026674146e-31	0.34138828599301	0.381	0.122	5.98827154842259e-27	3	Nsg1
Lpar4	6.55147888292796e-31	0.305209425350878	0.266	0.061	1.015413712065e-26	3	Lpar4
Ifi204	7.7902973133609e-31	0.328663161287214	0.435	0.15	1.20741818059781e-26	3	Ifi204
Aspn.3	1.04661357653502e-30	0.316025537034597	0.561	0.218	1.62214638227162e-26	3	Aspn
Thbs3	1.17287773173883e-30	0.326033739979978	0.392	0.129	1.81784319642202e-26	3	Thbs3
Klf4	3.75583961494339e-30	0.475808157036484	0.529	0.226	5.82117581920077e-26	3	Klf4
Itm2a.2	7.08174042884587e-30	0.410937244338598	0.601	0.276	1.09759894906682e-25	3	Itm2a
Gstm1	7.4905280881943e-30	0.31683152906073	0.381	0.121	1.16095694838923e-25	3	Gstm1
Ifi27l2a.2	1.04014615892215e-29	0.425892682613244	0.403	0.131	1.61212253171345e-25	3	Ifi27l2a
Ddr2.1	1.11661042537425e-29	0.399080631182073	0.446	0.167	1.73063449828756e-25	3	Ddr2
Fbln2.2	1.78803430519607e-29	0.471398906813029	0.691	0.373	2.77127436962338e-25	3	Fbln2
Tpm1.2	2.33310734101258e-29	-0.741290733461499	0.345	0.661	3.6160830678354e-25	3	Tpm1
Lpar1	4.18544065610372e-29	0.400443415740849	0.439	0.17	6.48701447289516e-25	3	Lpar1
Prg4	5.7470176583407e-29	0.525431771496284	0.263	0.063	8.90730266866226e-25	3	Prg4
Calm1	2.05256930260251e-28	-0.552708859681292	0.838	0.924	3.18127716210363e-24	3	Calm1
C1rb	9.67461436828156e-28	0.271035757931231	0.234	0.052	1.49946848093996e-23	3	C1rb
Col6a2.2	1.47917079673682e-27	0.419312276406082	0.748	0.444	2.2925668178624e-23	3	Col6a2
Tgfbi.2	2.98289357644179e-27	-0.814590364543299	0.147	0.469	4.62318675412713e-23	3	Tgfbi
Tgfbr2	1.19951401955276e-26	0.345266038363563	0.457	0.187	1.85912677890482e-22	3	Tgfbr2
Abca8a.3	1.27921290657262e-26	0.391939006343944	0.446	0.175	1.9826520838969e-22	3	Abca8a
Actb.2	5.29402601260718e-26	-0.575530585073515	0.986	0.993	8.20521091693986e-22	3	Actb
Plxdc2	9.3534478887195e-26	0.275820636023588	0.345	0.113	1.44969088827264e-21	3	Plxdc2
Nfix.3	1.92313477173542e-25	0.345633949801397	0.514	0.226	2.98066658271273e-21	3	Nfix
Mfap2.1	2.51705128351714e-25	0.310602175378617	0.475	0.196	3.90117778432321e-21	3	Mfap2
Mmp23	4.57326853696947e-25	0.318660034915454	0.388	0.143	7.08810890544898e-21	3	Mmp23
Fxyd1.1	5.16655497122528e-25	0.294912148524243	0.471	0.197	8.00764354990206e-21	3	Fxyd1
Sned1	7.06767213062249e-25	0.430473515715108	0.335	0.113	1.09541850352518e-20	3	Sned1
Gas1.1	1.26012377418789e-24	0.33843820902494	0.41	0.158	1.95306583761381e-20	3	Gas1
Htra1.2	1.37864262722141e-23	0.33738961692732	0.489	0.221	2.13675820793046e-19	3	Htra1
Maf.2	1.82351626284555e-23	0.34264927234924	0.453	0.187	2.82626785578432e-19	3	Maf
Nov.2	2.03215579132209e-23	0.363631651124637	0.306	0.098	3.14963826097011e-19	3	Nov
mt-Tc	3.55151373420879e-22	0.356533341621901	0.259	0.075	5.50449113665021e-18	3	mt-Tc
Vegfa	9.59428265554036e-22	0.254171259143801	0.313	0.107	1.4870178687822e-17	3	Vegfa
Scn7a	2.81334557518887e-21	0.278978618482458	0.353	0.132	4.36040430698523e-17	3	Scn7a
Lrp1	4.85559037799913e-21	0.397023484117827	0.669	0.417	7.52567952686085e-17	3	Lrp1
Col5a1.2	9.82414286072198e-21	0.306717063009983	0.676	0.395	1.5226439019833e-16	3	Col5a1
Errfi1.1	1.27148433596608e-20	0.423367970386581	0.424	0.194	1.97067357231383e-16	3	Errfi1
Serpinf1.1	3.39959009415393e-20	0.341203155730673	0.615	0.353	5.26902468692917e-16	3	Serpinf1
Lbp.1	5.06932469502815e-20	0.274617118954898	0.363	0.144	7.85694634482413e-16	3	Lbp
Slc43a3	6.77462849255815e-20	0.288016469388734	0.327	0.125	1.04999967006159e-15	3	Slc43a3
Col8a1.2	9.72761812612852e-20	-0.729249571488431	0.09	0.35	1.50768353336866e-15	3	Col8a1
Cpxm1.2	1.86341206100026e-19	0.341990925914741	0.525	0.26	2.8881023533443e-15	3	Cpxm1
Fgfr1.1	1.90426866110642e-19	0.301238780935605	0.446	0.21	2.95142599784884e-15	3	Fgfr1
Tgfbr3.1	2.66002929726593e-19	0.289222299019337	0.406	0.182	4.12277940783247e-15	3	Tgfbr3
Spp1.3	4.04343055705131e-19	-1.40446200790335	0.424	0.632	6.26691302037383e-15	3	Spp1
Olfml2b	5.92595272440658e-19	0.250776213925176	0.371	0.156	9.18463412755775e-15	3	Olfml2b
2810055G20Rik	6.26824800239299e-19	0.297096868868498	0.342	0.137	9.71515757890889e-15	3	2810055G20Rik
Peg3	7.56396980242461e-19	0.319658463398136	0.309	0.117	1.17233967967779e-14	3	Peg3
Gpx1.3	1.14029532269517e-18	-0.52738766170274	0.475	0.71	1.76734372064524e-14	3	Gpx1
Nbl1.1	1.26813115418869e-18	0.255025862066029	0.432	0.194	1.96547647587705e-14	3	Nbl1
Pcolce.1	2.37683317200085e-18	0.366208184856264	0.655	0.419	3.68385373328411e-14	3	Pcolce
Lama4.1	2.84922565140377e-18	0.308517066768719	0.435	0.21	4.4160148371107e-14	3	Lama4
Tnfaip6.2	5.05011251028372e-18	0.303324079106184	0.353	0.143	7.82716937968873e-14	3	Tnfaip6
Nfib.2	7.7335650181008e-18	0.282955774278244	0.601	0.332	1.19862524215544e-13	3	Nfib
Plac8.1	1.09099716673565e-17	0.272386179469768	0.378	0.163	1.69093650872359e-13	3	Plac8
Col5a2.2	1.16191211703939e-17	0.279179380343346	0.86	0.651	1.80084759019936e-13	3	Col5a2
Anxa3	1.1652824942536e-17	0.349876526200266	0.406	0.195	1.80607133784366e-13	3	Anxa3
Nrp1.1	1.69487024596001e-17	0.352161947663089	0.64	0.409	2.62687939421342e-13	3	Nrp1
Cfl1.1	1.90104897344936e-17	-0.392025084127101	0.45	0.678	2.94643580394916e-13	3	Cfl1
Pfn1.1	4.46132525287298e-17	-0.396088336352557	0.583	0.785	6.91460800942783e-13	3	Pfn1
Lrrc58.1	6.67024894713095e-17	-0.465951337968837	0.507	0.703	1.03382188431583e-12	3	Lrrc58
Prnp.1	7.49104848592336e-17	0.268123558715544	0.439	0.22	1.16103760483326e-12	3	Prnp
Ebf2.2	9.5927695126745e-17	0.264959474294154	0.396	0.186	1.48678334676942e-12	3	Ebf2
Adamts2.1	9.72439668283725e-17	0.258080332260579	0.478	0.244	1.50718424187295e-12	3	Adamts2
Malat1	1.07051982418751e-16	0.319072982075149	0.996	0.976	1.65919867550823e-12	3	Malat1
Lamb1.2	4.75743462067806e-16	0.282992678221896	0.46	0.24	7.37354791858892e-12	3	Lamb1
Tshz2.1	9.92246910952117e-16	0.279024289967474	0.396	0.193	1.53788348728469e-11	3	Tshz2
Nfia.1	2.44451979799988e-15	0.265454901335848	0.388	0.192	3.78876123492001e-11	3	Nfia
Tpm3	2.74775857360855e-15	-0.354837124635418	0.284	0.523	4.2587510132359e-11	3	Tpm3
Col6a1.2	3.2526131260225e-15	0.276184231873218	0.716	0.471	5.04122508402227e-11	3	Col6a1
Col4a1.2	3.42303188822883e-15	0.318228550571038	0.586	0.347	5.30535712356587e-11	3	Col4a1
Nptn	3.93739462279725e-15	0.273013171532358	0.489	0.277	6.10256792587345e-11	3	Nptn
Timp1.2	6.48788493752549e-14	-0.538815314254579	0.245	0.444	1.00555728646708e-09	3	Timp1
S100a13	8.40765612581226e-14	0.298819946217892	0.471	0.279	1.30310262293964e-09	3	S100a13
Nr2f2.2	8.66581907206157e-14	-0.301618403975897	0.068	0.273	1.34311529797882e-09	3	Nr2f2
Arpc2.1	9.55634694843483e-14	-0.343422364896267	0.424	0.637	1.48113821353791e-09	3	Arpc2
Tm4sf1.3	1.22394899768496e-13	-0.47922437163513	0.122	0.332	1.89699855151192e-09	3	Tm4sf1
Ahnak	2.31063694291309e-13	0.274738908814915	0.856	0.748	3.58125619782099e-09	3	Ahnak
Pkm	2.51867339337244e-13	-0.3237096671281	0.158	0.379	3.90369189238794e-09	3	Pkm
Pabpc1.1	5.95674514719203e-13	-0.290742852664007	0.957	0.976	9.23235930363292e-09	3	Pabpc1
Laptm5.3	6.2674438249832e-13	-0.385413162923364	0.007	0.173	9.71391118434147e-09	3	Laptm5
Actn1.1	6.99226937887396e-13	-0.2982993577614	0.076	0.268	1.08373183103168e-08	3	Actn1
Cpe.3	7.28244610719109e-13	-0.343467222744956	0.065	0.257	1.12870632215355e-08	3	Cpe
Srgn.3	3.71741251828817e-12	-0.610120606829597	0.079	0.259	5.76161766209484e-08	3	Srgn
Zfp36l1	6.12076593873624e-12	0.282493052930464	0.612	0.402	9.48657512844729e-08	3	Zfp36l1
Ctss.3	8.66021158326348e-12	-0.84604289774557	0.036	0.198	1.34224619329001e-07	3	Ctss
Ccnd1.2	1.39320447360153e-11	-0.326938995703682	0.076	0.258	2.15932761363502e-07	3	Ccnd1
Cox6c.1	1.66892499565325e-11	-0.295290802707592	0.615	0.784	2.58666685076297e-07	3	Cox6c
Rgs2.2	1.84136891138885e-11	-0.351669848415193	0.018	0.172	2.85393767576158e-07	3	Rgs2
Tyrobp.3	3.96022332177099e-11	-0.461121617938087	0.043	0.201	6.13795012641286e-07	3	Tyrobp
Serbp1	7.09561916397567e-11	-0.287332898245223	0.572	0.749	1.09975001422459e-06	3	Serbp1
Tpm3-rs7	1.22860018789596e-10	-0.293637531450043	0.176	0.364	1.90420743121995e-06	3	Tpm3-rs7
Thbs4.2	1.96677627129831e-10	-0.461514399718479	0.054	0.207	3.04830654288525e-06	3	Thbs4
Ccl9.3	1.97213330759732e-10	-0.434165944613959	0.065	0.22	3.05660941344508e-06	3	Ccl9
Ehd4.2	2.03876011977812e-10	-0.383237313978691	0.05	0.205	3.15987430964411e-06	3	Ehd4
Sec61b.1	3.57606533600217e-10	-0.267648651102526	0.273	0.461	5.54254366426976e-06	3	Sec61b
Neat1.3	3.98401621690884e-10	0.30769762024991	0.468	0.291	6.17482673458701e-06	3	Neat1
Tpm2.1	6.46257254648844e-10	-0.400253431355337	0.047	0.195	1.00163411898024e-05	3	Tpm2
Sh3bgrl3	7.43975693684157e-10	-0.289125296848346	0.237	0.411	1.15308792764107e-05	3	Sh3bgrl3
Fcer1g.3	9.6087933598215e-10	-0.367989700816991	0.04	0.181	1.48926688283873e-05	3	Fcer1g
Ptprc.3	1.50698157868741e-09	-0.273760733933173	0	0.118	2.33567074880761e-05	3	Ptprc
Cav1.1	1.56459175683081e-09	-0.388089385006694	0.115	0.272	2.42496076391208e-05	3	Cav1
Sept11.2	1.60167933748282e-09	-0.293672686086504	0.176	0.343	2.48244280516462e-05	3	Sept11
Ier3.1	1.7209667186084e-09	-0.47778340316276	0.101	0.256	2.66732631717116e-05	3	Ier3
S100a4.3	4.00172679100194e-09	-0.582128749728873	0.223	0.373	6.2022763533739e-05	3	S100a4
Slc25a5	4.57796190675872e-09	-0.254998819913694	0.169	0.338	7.09538315928534e-05	3	Slc25a5
Lgals3.2	4.8082609727998e-09	-0.570850265429112	0.205	0.356	7.45232368174241e-05	3	Lgals3
Mif.1	5.15920747433354e-09	-0.285206853404918	0.122	0.277	7.99625566446956e-05	3	Mif
Tmsb4x.3	5.41820151683475e-09	-0.553497648285504	0.993	0.979	8.39767053094217e-05	3	Tmsb4x
Gnas.3	9.77214877625474e-09	0.27109411543335	0.906	0.884	0.000151458533883172	3	Gnas
Ncl.2	1.16881510127843e-08	-0.330301101877427	0.612	0.72	0.000181154652547143	3	Ncl
Btg2	1.18443744630201e-08	-0.295385696818722	0.079	0.22	0.000183575959802349	3	Btg2
Lgals1.3	1.68019049155628e-08	-0.363530333030374	0.939	0.922	0.000260412724286308	3	Lgals1
Npm1.2	1.80133944034947e-08	-0.28824129432404	0.388	0.54	0.000279189599859765	3	Npm1
Mpeg1.3	1.86816598698606e-08	-0.373293903516802	0.036	0.159	0.00028954704632297	3	Mpeg1
Mylk.2	2.01761106206852e-08	-0.290907030856113	0.014	0.128	0.000312709538509999	3	Mylk
Cd14.3	2.7936163796211e-08	-0.35025341758348	0.018	0.131	0.000432982602677474	3	Cd14
Trf.2	3.18323634875218e-08	-0.721104870164143	0.108	0.242	0.0004933698016931	3	Trf
Cybb.3	4.75078605032901e-08	-0.40649338583373	0.032	0.148	0.000736324329940494	3	Cybb
Cd52.3	8.30885413782192e-08	-0.345714528467077	0.029	0.14	0.00128778930282102	3	Cd52
Ccl6.3	9.46491421584449e-08	-0.515309044397642	0.04	0.154	0.00146696705431374	3	Ccl6
Gpr116.3	1.22140323928808e-07	-0.311463472196944	0.029	0.138	0.0018930528805726	3	Gpr116
Acta2.2	1.93699061510697e-07	-0.611150924206197	0.029	0.137	0.0030021417543543	3	Acta2
Nr4a1.1	1.96612556657776e-07	-0.276853737020822	0.097	0.227	0.00304729801563887	3	Nr4a1
Sat1.2	2.28839081679936e-07	-0.299995111437641	0.187	0.328	0.00354677692695732	3	Sat1
Tnc.2	2.94802724345536e-07	-0.470502946366532	0.086	0.207	0.00456914742463147	3	Tnc
Mgp.2	3.92833426018528e-07	-0.759101336462263	0.363	0.488	0.00608852526986117	3	Mgp
Gatm.3	5.53495802287981e-07	-0.266962522058085	0.025	0.125	0.00857863143966141	3	Gatm
Lyz2.3	6.36201223276809e-07	-1.47882523186437	0.223	0.336	0.00986048275956727	3	Lyz2
Junb.2	7.8481498256895e-07	-0.276688292387995	0.392	0.537	0.0121638474148362	3	Junb
Cd63.2	8.89340358331088e-07	-0.287674353335002	0.619	0.704	0.0137838862137735	3	Cd63
Thbs1.1	1.04556391038727e-06	-0.254238441171371	0.097	0.223	0.0162051950470924	3	Thbs1
Zfp36.2	1.54487459087143e-06	-0.347224443849889	0.281	0.411	0.0239440112839163	3	Zfp36
Ccl2.1	1.56443555556112e-06	-0.579400869885109	0.18	0.295	0.0242471866756417	3	Ccl2
Sgk1.1	1.67058847358186e-06	-0.255719964598187	0.144	0.273	0.0258924507520453	3	Sgk1
H2-Ab1.3	1.97507891445112e-06	-0.791784046604146	0.04	0.137	0.0306117480950778	3	H2-Ab1
Pecam1.3	2.10759261955747e-06	-0.265055216501817	0.025	0.117	0.0326655780105212	3	Pecam1
Cxcl14.3	3.1749476476358e-06	0.421541688406381	0.248	0.146	0.0492085135907072	3	Cxcl14
Ccr2.3	3.47349296829012e-06	-0.444599384643777	0.032	0.123	0.0538356675155285	3	Ccr2
Fos.2	3.54042671282889e-06	-0.348065883995721	0.637	0.745	0.054873073622135	3	Fos
Egfl7.3	4.89966894532965e-06	-0.307022345384969	0.047	0.141	0.0759399689836643	3	Egfl7
Cthrc1.3	6.1223775813109e-06	-0.354572529510996	0.331	0.449	0.0948907301327376	3	Cthrc1
Ldha	6.46660513798445e-06	-0.252342706006472	0.277	0.393	0.100225913033621	3	Ldha
Nfkbia.2	7.86618520707465e-06	-0.465910995070835	0.273	0.388	0.12191800452445	3	Nfkbia
Cst3.3	1.15944513898781e-05	-0.467291553574012	0.741	0.803	0.17970240209172	3	Cst3
Plvap.3	1.29269005815627e-05	-0.380686162716675	0.043	0.131	0.20035403211364	3	Plvap
Tagln.2	1.29783865386293e-05	-0.339402252166237	0.025	0.107	0.201152012962216	3	Tagln
Ctgf.2	1.74240204352419e-05	-0.282048502691252	0.094	0.194	0.270054892725814	3	Ctgf
Fosb	3.46189202378224e-05	-0.253211321409256	0.353	0.475	0.536558644766009	3	Fosb
Wfdc17.3	5.14091075831139e-05	-0.279029352645037	0.032	0.108	0.796789758430683	3	Wfdc17
Cd74.3	6.03062219612096e-05	-1.19309570132517	0.083	0.166	0.934686134176788	3	Cd74
H2-Aa.3	6.10785941438176e-05	-0.785566084664901	0.05	0.13	0.946657130635029	3	H2-Aa
Cd36.2	8.34063169928364e-05	-0.43923228127843	0.086	0.169	1	3	Cd36
Cxcl2.3	9.2626471410977e-05	-0.888407371174382	0.072	0.152	1	3	Cxcl2
Cebpb.2	0.000119403835798579	-0.353657177571024	0.18	0.274	1	3	Cebpb
Ctsl.2	0.000240972116493132	-0.267108631691906	0.946	0.833	1	3	Ctsl
Cstb.1	0.000308754119266852	-0.265978688068858	0.263	0.353	1	3	Cstb
Aqp1.2	0.000491712176538596	-0.423812882163369	0.083	0.157	1	3	Aqp1
Ctsb.3	0.000511382814106708	-0.480108431101857	0.881	0.883	1	3	Ctsb
Gpnmb.3	0.00059120129468031	-0.410073183757217	0.058	0.124	1	3	Gpnmb
Fabp4.2	0.000872575970782873	-1.1343838683122	0.209	0.281	1	3	Fabp4
Ccl7.1	0.00149200623923311	-0.277405211422241	0.155	0.226	1	3	Ccl7
Lrg1.3	0.00161318267182201	-0.325871712283119	0.058	0.117	1	3	Lrg1
Ctsd.3	0.0017702283053595	-0.614316678241811	0.335	0.392	1	3	Ctsd
Ctla2a.3	0.00801232147602702	-0.461418422266455	0.126	0.178	1	3	Ctla2a
Pecam1.4	0	1.25170854674566	0.81	0.018	0	4	Pecam1
Gpr116.4	4.42278415786274e-271	1.25335591458483	0.806	0.04	6.85487316627145e-267	4	Gpr116
Plvap.4	1.61874003036429e-268	1.55794423604782	0.781	0.037	2.50888517306162e-264	4	Plvap
Ptprb	2.94215145686098e-268	1.0496871626252	0.672	0.014	4.56004054298883e-264	4	Ptprb
Flt1.2	6.22462257870046e-245	1.10705691379006	0.656	0.019	9.64754253472785e-241	4	Flt1
Egfl7.4	3.43288444371687e-237	1.30202755313347	0.765	0.05	5.32062759931678e-233	4	Egfl7
Cdh5	7.94896020369053e-235	0.908219252773336	0.692	0.03	1.23200934197e-230	4	Cdh5
Mmrn2	1.59616744663096e-229	0.796250289167787	0.579	0.011	2.47389992553333e-225	4	Mmrn2
Esam	1.29353582895226e-225	0.968752097527663	0.684	0.033	2.0048511812931e-221	4	Esam
Tmem88	2.16280767735131e-220	0.721855836512444	0.538	0.008	3.35213561912679e-216	4	Tmem88
Sdpr.3	3.70727068164506e-213	1.48411386510632	0.822	0.085	5.74589882948167e-209	4	Sdpr
Myct1	6.95246267679508e-201	0.654454740510982	0.506	0.009	1.07756219027647e-196	4	Myct1
Ushbp1	3.0177862842898e-195	0.628550907393818	0.494	0.009	4.67726696202076e-191	4	Ushbp1
Kdr	3.00023962648696e-193	0.744334368522652	0.534	0.016	4.65007139709214e-189	4	Kdr
Grrp1	1.02272130740345e-185	0.542202812298238	0.445	0.005	1.58511575434461e-181	4	Grrp1
Clec14a	2.49028236271166e-183	0.661812501838827	0.502	0.014	3.8596886339668e-179	4	Clec14a
S1pr1	3.43525378625243e-174	0.728018548434608	0.53	0.023	5.32429984331264e-170	4	S1pr1
Palmd	1.1961688505458e-173	0.579404554440567	0.457	0.01	1.85394210146094e-169	4	Palmd
Fam101b	6.26258427166655e-171	0.896343471279683	0.522	0.023	9.70637936265598e-167	4	Fam101b
Tspan13	2.6588937708249e-169	0.754557621755909	0.587	0.037	4.12101945540152e-165	4	Tspan13
Emcn	6.11082780091192e-169	0.761968564866452	0.555	0.031	9.47117200863338e-165	4	Emcn
Lrg1.4	1.06474865058169e-168	1.41416210673745	0.611	0.047	1.65025393353656e-164	4	Lrg1
Rasip1	1.05100854449577e-167	0.517244155707963	0.441	0.009	1.628958143114e-163	4	Rasip1
Scarb1	1.26941615389402e-165	0.896532201291045	0.547	0.031	1.96746809692034e-161	4	Scarb1
Erg	3.11986717559504e-164	0.554930013783644	0.437	0.01	4.83548213545476e-160	4	Erg
C130074G19Rik	6.19718216572825e-164	0.642512415675609	0.445	0.012	9.60501263866221e-160	4	C130074G19Rik
Ctla2a.4	3.96723815961407e-161	1.68167236809109	0.741	0.1	6.14882242358585e-157	4	Ctla2a
Tmem252	7.49884049924295e-161	0.877689611197444	0.449	0.014	1.16224528897766e-156	4	Tmem252
Ehd4.3	3.11926867956623e-159	1.24447933290434	0.765	0.113	4.8345545264597e-155	4	Ehd4
Eltd1	2.01543431767597e-158	0.528084930752453	0.405	0.007	3.12372164896598e-154	4	Eltd1
Tie1	7.49199770109991e-156	0.437417360806506	0.413	0.009	1.16118472369348e-151	4	Tie1
Tspan7	5.10148632289514e-155	0.632779015031942	0.522	0.03	7.90679365185518e-151	4	Tspan7
Mgll.3	1.51859042336125e-152	1.00399592864226	0.652	0.07	2.3536632971676e-148	4	Mgll
Gimap4	2.84194293631155e-150	0.449167134027336	0.421	0.012	4.40472735698928e-146	4	Gimap4
Gimap6	6.04191791089394e-148	0.587544412647123	0.502	0.028	9.36436857009451e-144	4	Gimap6
Robo4	2.6812820345539e-144	0.434723170388753	0.36	0.005	4.15571902535509e-140	4	Robo4
Eng	4.10670440090084e-143	0.725253042995234	0.587	0.055	6.36498115095622e-139	4	Eng
Chp2	1.34593148120944e-138	0.449100011986142	0.32	0.002	2.08605920272651e-134	4	Chp2
Aplnr	8.41528801975158e-137	0.399394208040849	0.316	0.002	1.3042854901813e-132	4	Aplnr
Icam2	1.30664673104637e-132	0.439592810028494	0.36	0.009	2.02517176844877e-128	4	Icam2
Edn1	1.38918024560719e-132	0.900060501618495	0.486	0.034	2.15309046266658e-128	4	Edn1
Vwf	3.1220295626674e-132	0.744425287650151	0.409	0.018	4.8388336191782e-128	4	Vwf
Abcg2	1.60096318184756e-131	0.623960028858498	0.534	0.047	2.48133283554554e-127	4	Abcg2
Cd36.3	6.42027333910388e-130	1.45372632331463	0.656	0.097	9.9507816482771e-126	4	Cd36
Ramp2.2	1.47113470029962e-129	0.88310239545703	0.717	0.122	2.28011167199438e-125	4	Ramp2
Sox17	2.0313785627021e-129	0.413011656974457	0.32	0.004	3.14843363433199e-125	4	Sox17
Selp	9.11206634290142e-127	0.762223747472708	0.348	0.009	1.41227916248629e-122	4	Selp
Entpd1	1.05453264471492e-126	0.625870249114617	0.482	0.035	1.63442014604366e-122	4	Entpd1
Fabp4.3	1.14981896181533e-124	2.71285705232399	0.789	0.207	1.78210440891758e-120	4	Fabp4
Rbp7	7.68895596954655e-123	1.06017917564639	0.368	0.014	1.19171128572002e-118	4	Rbp7
Gbp4	1.6375031738124e-122	0.607147257562143	0.421	0.024	2.53796616909184e-118	4	Gbp4
Tinagl1	1.06124183572437e-120	0.62839394164084	0.494	0.04	1.6448187211892e-116	4	Tinagl1
F11r	6.4396446233117e-118	0.457352438689487	0.437	0.03	9.9808052016708e-114	4	F11r
Aqp1.3	2.46606350975712e-117	1.61302716022197	0.599	0.091	3.82215183377255e-113	4	Aqp1
Ecscr	2.9525584192004e-117	0.672353458059212	0.526	0.056	4.5761702939187e-113	4	Ecscr
Cd93.2	4.25865038692788e-117	0.751893857080741	0.575	0.07	6.60048223469952e-113	4	Cd93
Podxl	1.42611078674834e-112	0.41017063240198	0.312	0.008	2.21032910838125e-108	4	Podxl
8430408G22Rik	3.28986572488786e-111	0.497737151040028	0.308	0.008	5.09896288700369e-107	4	8430408G22Rik
C1qtnf9	9.95601427797424e-111	0.355884426206072	0.275	0.004	1.54308265294323e-106	4	C1qtnf9
Gimap1	8.0568008238414e-108	0.331288082194977	0.296	0.007	1.24872355968718e-103	4	Gimap1
Fam167b	4.56548541283371e-107	0.383239498640787	0.267	0.004	7.07604584135097e-103	4	Fam167b
Prex2	6.01821673530581e-107	0.385407966066109	0.34	0.015	9.32763411805048e-103	4	Prex2
Cd300lg	7.55025973533699e-106	0.422881986602872	0.3	0.009	1.17021475637988e-101	4	Cd300lg
Syt15	1.10169005561388e-105	0.298250248075994	0.239	0.001	1.70750941719595e-101	4	Syt15
Gpihbp1	2.05075332358687e-104	0.564013812896616	0.275	0.006	3.17846257622728e-100	4	Gpihbp1
Cav1.2	9.04661952417223e-100	1.02626991031553	0.749	0.191	1.40213556005145e-95	4	Cav1
Gimap5	1.16898430444001e-99	0.336755508502101	0.312	0.013	1.81180877345157e-95	4	Gimap5
Abcb1a	7.53166752033319e-99	0.397280022570903	0.34	0.019	1.16733314897644e-94	4	Abcb1a
Fli1	1.06218501309667e-97	0.504384755835413	0.437	0.043	1.64628055179852e-93	4	Fli1
Rasgrp3	3.4856265100686e-97	0.349547673649738	0.267	0.007	5.40237252795533e-93	4	Rasgrp3
Vamp5	8.21779070965915e-96	0.474521479708497	0.445	0.047	1.27367538209007e-91	4	Vamp5
Cdh13	1.5098890417877e-94	0.379228052218026	0.324	0.018	2.34017702586676e-90	4	Cdh13
Epas1	4.89408888831063e-94	0.565056431073438	0.474	0.057	7.58534836799264e-90	4	Epas1
Pim3	2.64143036900201e-92	0.431315233939719	0.364	0.028	4.09395292891621e-88	4	Pim3
Hspb1	2.00537688054709e-89	0.695390644420249	0.522	0.082	3.10813362715993e-85	4	Hspb1
Cyyr1	5.49175801882339e-89	0.253904996488829	0.235	0.005	8.51167575337437e-85	4	Cyyr1
Lgals1.4	1.07383166441828e-88	-1.19558930989976	0.559	0.97	1.66433169668189e-84	4	Lgals1
Sorbs2	2.83668807163114e-88	0.403099345832758	0.36	0.028	4.39658284222111e-84	4	Sorbs2
Adcy4	1.59762162411405e-87	0.45558795396183	0.393	0.038	2.47615375521436e-83	4	Adcy4
Arhgef15	3.71542584313575e-87	0.264239836294954	0.227	0.004	5.75853851427611e-83	4	Arhgef15
Sox18	5.43421150421984e-87	0.282645263837669	0.223	0.004	8.42248441039033e-83	4	Sox18
Darc	2.03756774584001e-86	0.650644288593086	0.332	0.025	3.15802624927743e-82	4	Darc
Clca1	7.51498638275161e-86	0.373960580225758	0.231	0.005	1.16474773946267e-81	4	Clca1
Ece1.1	7.59359876214487e-86	0.769790671071252	0.68	0.179	1.17693187214483e-81	4	Ece1
Pde2a	1.67770569656047e-85	0.345609176895275	0.328	0.023	2.60027605909907e-81	4	Pde2a
Cd200.2	2.70050429868905e-84	0.781541065263069	0.615	0.136	4.18551161253816e-80	4	Cd200
Col1a2.3	3.02127583977966e-83	-2.25832704496736	0.656	0.942	4.68267542407449e-79	4	Col1a2
Unc45b	7.91193138083919e-81	0.294205721407393	0.263	0.012	1.22627024471627e-76	4	Unc45b
Kank3	5.405266566265e-80	0.266979992842879	0.247	0.01	8.37762265105412e-76	4	Kank3
Crim1	1.33597673616007e-79	0.447286589613191	0.401	0.046	2.07063034337449e-75	4	Crim1
Spint2	2.13382712854594e-79	0.277182240862432	0.243	0.009	3.30721866653335e-75	4	Spint2
Crip2	4.89854701775899e-79	0.609595526719712	0.611	0.137	7.59225802282466e-75	4	Crip2
Ets1	1.01842380790274e-78	0.502379642651613	0.466	0.07	1.57845505986846e-74	4	Ets1
Ctla2b	4.63619201091441e-78	0.332920457279086	0.259	0.013	7.18563399771624e-74	4	Ctla2b
Iigp1	5.43729925538753e-78	0.589728437782203	0.368	0.039	8.42727011592514e-74	4	Iigp1
Galnt15	1.78007759748361e-76	0.297639659016875	0.271	0.016	2.75894226833984e-72	4	Galnt15
Col1a1.2	3.34095114340387e-76	-1.82896649561317	0.587	0.93	5.17814017716165e-72	4	Col1a1
Csf2rb	6.48432863651046e-76	0.419333606581432	0.425	0.056	1.00500609537276e-71	4	Csf2rb
Tm4sf1.4	9.40538661708302e-76	1.01659780144144	0.749	0.251	1.4577408717817e-71	4	Tm4sf1
Fn1.2	3.67844867246414e-75	-1.44112200854535	0.522	0.919	5.70122759745217e-71	4	Fn1
Jam2	7.44850376176649e-74	0.457868614747343	0.421	0.06	1.15444359803619e-69	4	Jam2
Lpar6	1.82556449645396e-73	0.461501665005649	0.352	0.038	2.82944241305399e-69	4	Lpar6
Ly6e.1	2.57994617694204e-73	0.882925205673529	0.802	0.324	3.99865857964247e-69	4	Ly6e
Col3a1.3	6.51880760136951e-73	-2.03345709176625	0.696	0.951	1.01034999013626e-68	4	Col3a1
Cldn5	1.0762789055951e-72	0.479056580606285	0.186	0.003	1.66812467578185e-68	4	Cldn5
Mecom	1.1034565492028e-72	0.254020614804774	0.215	0.007	1.71024730560941e-68	4	Mecom
Igfbp7.1	5.76734380611772e-72	1.16286081224387	0.992	0.835	8.93880616510186e-68	4	Igfbp7
Mef2c	5.99939339233567e-72	0.561130861847324	0.449	0.071	9.29845981878106e-68	4	Mef2c
Csf2rb2	7.93358229440949e-71	0.359545078327547	0.296	0.024	1.22962591981053e-66	4	Csf2rb2
S100a6.3	1.82752456701778e-69	-1.04355466064494	0.87	0.982	2.83248032642086e-65	4	S100a6
Dcn.4	3.3456402542848e-69	-2.00984703326723	0.571	0.902	5.18540783011602e-65	4	Dcn
Id1	4.16494224979823e-69	0.29964331548023	0.227	0.011	6.45524399296227e-65	4	Id1
Sema6a	2.10643998559472e-68	0.339670304398458	0.283	0.023	3.26477133367325e-64	4	Sema6a
Apold1	4.52453981907332e-68	0.476932822688631	0.283	0.023	7.01258426558174e-64	4	Apold1
Ablim1.2	8.54969910316629e-68	0.618665164659424	0.579	0.144	1.32511786399974e-63	4	Ablim1
Clec1a	9.00666132564642e-67	0.256844041369379	0.227	0.012	1.39594243886194e-62	4	Clec1a
Ndrg1	1.49036828431136e-66	0.548341962499385	0.494	0.1	2.30992180385418e-62	4	Ndrg1
Fam43a	3.79363939127252e-66	0.332213843343523	0.308	0.031	5.87976169253328e-62	4	Fam43a
Tcf4.3	5.79976487235387e-66	0.791715013689856	0.769	0.304	8.98905557566126e-62	4	Tcf4
Socs2	6.16810769266206e-66	0.428778728456744	0.377	0.053	9.55995011285692e-62	4	Socs2
Slc9a3r2	6.19680789910083e-66	0.448934076357723	0.348	0.043	9.60443256281638e-62	4	Slc9a3r2
2200002D01Rik	1.00662731995054e-65	0.430505736768257	0.348	0.044	1.56017168319134e-61	4	2200002D01Rik
Tek	4.25719629058115e-65	0.366305400719947	0.36	0.047	6.59822853077173e-61	4	Tek
Aplp2.1	6.02363467118126e-65	0.711770811374238	0.717	0.248	9.33603137686383e-61	4	Aplp2
Sparcl1.2	2.24100667581365e-63	0.926010800593755	0.87	0.443	3.47333624684357e-59	4	Sparcl1
Tmcc3	1.21117106051755e-62	0.371873985832804	0.381	0.057	1.87719402669615e-58	4	Tmcc3
Cd2ap	1.21460037556826e-62	0.577515979752699	0.547	0.135	1.88250912209325e-58	4	Cd2ap
Mllt4	2.72259224175396e-62	0.353392064714277	0.393	0.061	4.21974571549446e-58	4	Mllt4
Pdlim1.1	2.11508236563832e-61	0.60306314770605	0.522	0.123	3.27816615850283e-57	4	Pdlim1
Shank3	6.77037799115996e-61	0.263170580060345	0.243	0.018	1.04934088484988e-56	4	Shank3
Sult1a1	1.02740089028858e-57	0.352118192278526	0.259	0.024	1.59236863985827e-53	4	Sult1a1
Clu	7.32757889669826e-57	0.550284460506538	0.316	0.042	1.13570145319926e-52	4	Clu
Gbp9	2.39717035301759e-56	0.35699387234201	0.251	0.023	3.71537433014196e-52	4	Gbp9
Lmo1	2.47185455542284e-55	0.272448349375919	0.255	0.025	3.83112737544986e-51	4	Lmo1
Pkp4	2.97216144255174e-55	0.283350110994747	0.255	0.025	4.60655301981093e-51	4	Pkp4
2900026A02Rik	1.83781120593473e-54	0.287358838701013	0.279	0.032	2.84842358807824e-50	4	2900026A02Rik
Snrk	1.93392492553631e-54	0.257082700018848	0.275	0.031	2.99739024208873e-50	4	Snrk
Stmn2	3.8024257268966e-54	0.465600978942993	0.211	0.015	5.89337963411705e-50	4	Stmn2
Bcam	9.34165993645332e-54	0.320214437783092	0.283	0.034	1.4478638735509e-49	4	Bcam
Ypel2	1.38788998453256e-53	0.270237768509621	0.223	0.018	2.15109068702702e-49	4	Ypel2
Gng11.1	3.23131329350986e-52	0.587786833193371	0.615	0.21	5.00821247361093e-48	4	Gng11
Sele	5.21652423798411e-51	0.255410642946417	0.134	0.003	8.08509091645158e-47	4	Sele
H2-D1.3	1.24987276120387e-50	0.742354088161002	0.951	0.657	1.93717779258988e-46	4	H2-D1
Fstl1.3	1.57879367091112e-49	-1.19342732540936	0.611	0.871	2.44697231054514e-45	4	Fstl1
Cd63.3	1.55477338660405e-48	-0.767840019088376	0.304	0.742	2.40974327189762e-44	4	Cd63
BC028528	3.50920898482168e-48	0.375442061978201	0.336	0.059	5.43892300557512e-44	4	BC028528
Fnbp1l	4.28641932565592e-48	0.320992864288899	0.324	0.053	6.64352131283411e-44	4	Fnbp1l
Sh3bp5	1.12722754394299e-47	0.45467723629189	0.462	0.117	1.74708997035724e-43	4	Sh3bp5
Col5a2.3	2.15518128035875e-47	-0.863832429291756	0.291	0.725	3.34031546642802e-43	4	Col5a2
Ifitm3.1	3.20742718912123e-47	0.703256737584376	0.992	0.84	4.971191400419e-43	4	Ifitm3
Fam13c	3.61852840013571e-47	0.268052737902881	0.239	0.027	5.60835716737034e-43	4	Fam13c
Arhgap29	3.48183213367985e-46	0.394776396198107	0.425	0.1	5.39649162399041e-42	4	Arhgap29
Hip1	3.814896027059e-46	0.351217891517281	0.344	0.065	5.91270735233875e-42	4	Hip1
Psmb9	8.5325150640993e-46	0.346985160663835	0.308	0.051	1.32245450978475e-41	4	Psmb9
H2-K1.3	3.38061046895401e-44	0.630116284403468	0.883	0.556	5.23960816583182e-40	4	H2-K1
Cav2	2.46496497712837e-43	0.271223960440445	0.255	0.035	3.82044921805126e-39	4	Cav2
Ldb2	1.07984110543018e-42	0.356913067525999	0.304	0.055	1.67364572930623e-38	4	Ldb2
Ctnnal1	1.1374437029353e-42	0.256067186131548	0.194	0.019	1.76292399517942e-38	4	Ctnnal1
2810025M15Rik	1.30549747420501e-42	0.336995802279178	0.312	0.058	2.02339053527034e-38	4	2810025M15Rik
Aebp1.2	1.83058543003168e-42	-0.834895945427682	0.352	0.734	2.83722435800609e-38	4	Aebp1
Nrp2	1.93375440857586e-41	0.370670228141482	0.344	0.073	2.99712595785173e-37	4	Nrp2
Fam198b	2.94947940262492e-41	0.284625220118024	0.3	0.053	4.57139812612836e-37	4	Fam198b
Gsn.4	3.94915943941758e-41	-1.44144282297322	0.389	0.75	6.1208022151533e-37	4	Gsn
Gbp7	6.25360257691717e-41	0.523569767531126	0.381	0.091	9.69245863396393e-37	4	Gbp7
Plcb4	1.08884982316676e-40	0.359507006440205	0.324	0.066	1.68760834092616e-36	4	Plcb4
Kitl.1	2.14465185427808e-40	0.442593621464037	0.506	0.157	3.3239959089456e-36	4	Kitl
Elk3	1.39948889444808e-39	0.341798819968962	0.389	0.096	2.16906783750507e-35	4	Elk3
Sncg	2.34143162894922e-39	0.277375033580644	0.243	0.035	3.62898488170839e-35	4	Sncg
Myh9	3.26803776347613e-39	0.534235586072655	0.619	0.264	5.06513172961165e-35	4	Myh9
Meg3.2	4.02601981730942e-39	-1.03124243256254	0.332	0.699	6.23992811484787e-35	4	Meg3
Lum.2	7.93230433476695e-39	-1.10152959993882	0.421	0.742	1.22942784884553e-34	4	Lum
Col4a1.3	6.27882006350343e-38	0.50991422420662	0.737	0.332	9.73154321642397e-34	4	Col4a1
Lrp1.1	6.69925100328261e-38	-0.673839298892152	0.053	0.497	1.03831691299877e-33	4	Lrp1
Pcp4l1	9.64872891630558e-38	0.28780858266765	0.186	0.02	1.4954564947382e-33	4	Pcp4l1
Id3.1	2.18459535852524e-37	0.579778735922949	0.514	0.183	3.38590434617826e-33	4	Id3
Rps11.1	3.53079122496073e-37	0.516419596216975	0.951	0.753	5.47237331956664e-33	4	Rps11
Lifr	5.37918935080452e-37	0.27448067555428	0.271	0.049	8.33720557481192e-33	4	Lifr
Tsc22d1	1.02739372945392e-36	0.565169438618695	0.526	0.204	1.59235754128064e-32	4	Tsc22d1
Rbpms	1.10109588299831e-36	0.323983344207007	0.34	0.079	1.70658850905909e-32	4	Rbpms
Trim47	6.2622075259528e-36	0.303698673035502	0.316	0.07	9.70579544447425e-32	4	Trim47
Itga6	8.61834585107127e-36	0.264931041233696	0.308	0.064	1.33575742345754e-31	4	Itga6
Tmsb4x.4	8.98139073765833e-36	0.421260060889334	1	0.978	1.39202575042966e-31	4	Tmsb4x
Foxo1	4.42229757688237e-35	0.271221168006266	0.283	0.056	6.85411901440998e-31	4	Foxo1
Cebpg	7.99756480389725e-35	0.413008148196372	0.401	0.116	1.23954256895603e-30	4	Cebpg
Ctsl.3	1.03646841058507e-34	-0.954481342267578	0.66	0.87	1.6064223895658e-30	4	Ctsl
Gja4	1.29303927066629e-34	0.273811555422256	0.146	0.012	2.00408156560568e-30	4	Gja4
Col5a1.3	2.20612514213365e-34	-0.638061707988284	0.061	0.476	3.41927335779294e-30	4	Col5a1
Nfib.3	2.84942019023848e-34	0.500502916183193	0.696	0.324	4.41631635285061e-30	4	Nfib
Rps14.1	7.24662197290336e-34	0.464900363822037	0.976	0.962	1.12315393958029e-29	4	Rps14
Rnase4.2	2.0600459617058e-33	-0.721482600877899	0.194	0.576	3.19286523604781e-29	4	Rnase4
Col6a1.3	9.14373195304983e-33	-0.656581804302315	0.158	0.544	1.41718701540319e-28	4	Col6a1
Col4a2.2	1.18762173796413e-32	0.517044543807688	0.603	0.261	1.8406949316706e-28	4	Col4a2
Bgn.2	1.32345202664791e-32	-0.781953750942465	0.433	0.724	2.05121829610159e-28	4	Bgn
Uaca	1.42847943668238e-32	0.440613532542212	0.405	0.127	2.21400027891402e-28	4	Uaca
B2m.3	3.49655362841886e-32	0.535029476045991	0.98	0.897	5.41930846868639e-28	4	B2m
Nck1	4.35476071178779e-32	0.275417772963842	0.344	0.089	6.7494436271999e-28	4	Nck1
Calm1.1	5.06164199469342e-32	0.467099183663674	0.988	0.904	7.84503892757534e-28	4	Calm1
Fbn1.3	1.19690053044509e-31	-0.927292066371193	0.385	0.708	1.85507613213684e-27	4	Fbn1
Txnip.2	4.76287987757763e-31	0.513094553654613	0.518	0.216	7.38198752225756e-27	4	Txnip
Pcolce.2	1.47094974111383e-30	-0.648734315732553	0.113	0.49	2.27982500375232e-26	4	Pcolce
Ly6c1.3	1.91599170719203e-30	0.704998095827188	0.623	0.299	2.96959554697693e-26	4	Ly6c1
Col6a2.3	5.21264732923911e-30	-0.612119956358801	0.154	0.523	8.07908209558769e-26	4	Col6a2
Ncoa7	1.00615150757388e-29	0.33530430105108	0.316	0.083	1.55943422158876e-25	4	Ncoa7
Ifi203	1.97168236849635e-29	0.392136318831908	0.478	0.175	3.0559105029325e-25	4	Ifi203
Mmp2.3	2.84980942814777e-29	-0.68407871943212	0.259	0.595	4.41691963268623e-25	4	Mmp2
Rps3.1	4.30035990200554e-29	0.487081721216948	0.984	0.923	6.66512781211838e-25	4	Rps3
Ndufa8	4.62109337689317e-29	0.361370876278628	0.466	0.177	7.16223262484673e-25	4	Ndufa8
Apbb2	6.21312106628662e-29	0.285297494306128	0.312	0.083	9.62971634063763e-25	4	Apbb2
Smco4	8.5387545701616e-29	0.275814698954147	0.239	0.05	1.32342157082935e-24	4	Smco4
Lsp1.4	2.16259815533028e-28	-0.72200684482452	0.032	0.392	3.35181088094641e-24	4	Lsp1
Tagln.3	2.22999426971598e-28	0.37208552980805	0.291	0.072	3.45626811863279e-24	4	Tagln
Luzp1	3.4630271253976e-28	0.287741056689601	0.36	0.109	5.36734574165375e-24	4	Luzp1
Hsp90b1.1	3.83918936797774e-28	-0.558608203694272	0.781	0.942	5.9503596014287e-24	4	Hsp90b1
Anxa1	4.91633110526845e-28	-0.554449885876683	0.368	0.686	7.61982158005558e-24	4	Anxa1
Wars	6.14219098064467e-28	0.250900487468531	0.235	0.049	9.51978180090118e-24	4	Wars
Ogn.2	9.764653530545e-28	-0.834981541546339	0.093	0.446	1.51342365069917e-23	4	Ogn
Serpinf1.2	1.10827043326418e-27	-0.588636240659306	0.061	0.426	1.71770834451616e-23	4	Serpinf1
Hspa5.1	1.16460096190946e-27	-0.602539345205974	0.761	0.883	1.80501503086348e-23	4	Hspa5
Col6a3.2	1.18347455271772e-27	-0.590209868599185	0.186	0.533	1.83426720925719e-23	4	Col6a3
Gbp3	1.19313420492961e-27	0.25434856174857	0.211	0.039	1.84923870422039e-23	4	Gbp3
Cd151	1.25603978257439e-27	0.307146952314418	0.389	0.13	1.94673605901205e-23	4	Cd151
Igfbp6.2	3.44114497683505e-27	-0.883763996734937	0.211	0.543	5.33343059959664e-23	4	Igfbp6
Mfap5.4	4.00248126684336e-27	-0.775837083337739	0.097	0.447	6.20344571548053e-23	4	Mfap5
Gpc3.2	4.86159396075515e-27	-0.727197767031964	0.036	0.389	7.53498447977441e-23	4	Gpc3
Fkbp1a.1	6.83400647140277e-27	0.44507475858002	0.656	0.345	1.05920266300271e-22	4	Fkbp1a
Slfn5	1.24975381663749e-26	0.390915283478905	0.401	0.142	1.93699344040645e-22	4	Slfn5
Mmp14.2	1.39329351761903e-26	-0.527659570939545	0.121	0.477	2.15946562295773e-22	4	Mmp14
Postn.4	1.41848589934788e-26	-0.932869609539886	0.247	0.567	2.19851129539927e-22	4	Postn
Ccdc80.3	1.54198382118502e-26	-0.772432616325444	0.069	0.414	2.38992072445466e-22	4	Ccdc80
Loxl2.3	2.19845687298696e-26	-0.619210410815017	0.045	0.389	3.40738830744249e-22	4	Loxl2
Ctsb.4	2.21312085213436e-26	-0.784055833640815	0.777	0.896	3.43011600872305e-22	4	Ctsb
Adipor2	2.66812855664483e-26	0.254374723736717	0.267	0.067	4.13533244994382e-22	4	Adipor2
Rab11a	2.99215625953468e-26	0.380924440358234	0.474	0.199	4.63754298665281e-22	4	Rab11a
Marcks.2	1.05969441778585e-25	-0.556175438422424	0.599	0.796	1.64242037812629e-21	4	Marcks
Col14a1.4	3.61333179596856e-25	-0.72445928973866	0.053	0.384	5.60030295057168e-21	4	Col14a1
Col5a3.2	1.80103371018225e-24	-0.541243251662742	0.032	0.355	2.79142214741147e-20	4	Col5a3
Bicc1.2	1.9674882702849e-24	-0.603482356807659	0.04	0.368	3.04941007011457e-20	4	Bicc1
Ppp2r5a	2.97736739102886e-24	0.291289675230245	0.356	0.12	4.61462171935563e-20	4	Ppp2r5a
Thbs2.3	4.85301930177743e-24	-0.548089020370221	0.008	0.32	7.52169461582485e-20	4	Thbs2
Tmem176b	7.49051288369232e-24	0.365881129390194	0.51	0.224	1.16095459184347e-19	4	Tmem176b
Olfml3.2	9.00845455543155e-24	-0.440172830977781	0.016	0.328	1.39622037154634e-19	4	Olfml3
Sp100	9.27433535710124e-24	0.262631148763882	0.316	0.095	1.43742923699712e-19	4	Sp100
Apod.3	1.30573634070396e-23	-1.90705321147872	0.846	0.95	2.02376075445707e-19	4	Apod
mt-Nd5.1	1.48602571610937e-23	0.45487412267502	0.607	0.321	2.30319125739792e-19	4	mt-Nd5
Igfbp5.3	1.71861288636157e-23	-1.19553793653155	0.381	0.641	2.66367811257179e-19	4	Igfbp5
Rcn3.3	2.57338818340574e-23	-0.506285089187303	0.154	0.479	3.98849434546056e-19	4	Rcn3
Timp1.3	4.59103727968759e-23	-0.665752548103691	0.142	0.454	7.1156486797878e-19	4	Timp1
Rpl18a.1	5.02367943793993e-23	0.398694601540954	0.761	0.522	7.7862007608631e-19	4	Rpl18a
Gltscr2	5.17480533815582e-23	0.359633687604996	0.47	0.206	8.02043079360771e-19	4	Gltscr2
P4hb.1	6.05786850306501e-23	-0.450708202661796	0.405	0.682	9.38909039290047e-19	4	P4hb
Psmb8	7.4204400879617e-23	0.307996234136657	0.377	0.137	1.15009400923318e-18	4	Psmb8
Rgcc	8.08075165851513e-23	0.411208699910261	0.223	0.054	1.25243569955326e-18	4	Rgcc
Marc2	8.52185568061885e-23	0.29657151066573	0.332	0.11	1.32080241193912e-18	4	Marc2
Rps21	1.00545511371409e-22	0.356956114883334	0.992	0.958	1.55835488074547e-18	4	Rps21
Ddit4	1.12584432109037e-22	0.291722481988786	0.32	0.102	1.74494611325797e-18	4	Ddit4
Fabp5.2	1.28164691104447e-22	0.292507103449204	0.34	0.11	1.98642454742783e-18	4	Fabp5
S100a16.1	1.48122964542191e-22	0.354971512296485	0.482	0.219	2.29575782743942e-18	4	S100a16
Bst2	1.67503540052582e-22	0.255694569433205	0.32	0.102	2.59613736727496e-18	4	Bst2
Ppap2a	2.95820386138127e-22	0.307877922211071	0.251	0.069	4.58492016475483e-18	4	Ppap2a
Eef1a1.1	3.33375312492414e-22	0.386390744578387	0.955	0.832	5.16698396831993e-18	4	Eef1a1
Smad1	4.47543010738049e-22	0.254628357582545	0.243	0.066	6.93646912342901e-18	4	Smad1
RP23-103I12.13.3	4.72991575692246e-22	-0.439555327578623	0.024	0.32	7.33089643165413e-18	4	RP23-103I12.13
Tmod3	5.84353298362532e-22	0.268252234616266	0.389	0.147	9.05689177132089e-18	4	Tmod3
C1s.2	1.64228568374498e-21	-0.597689551252324	0.085	0.385	2.54537858123635e-17	4	C1s
Serpinh1.2	1.69035567553892e-21	-0.493880523549381	0.628	0.791	2.61988226151777e-17	4	Serpinh1
Efemp1.3	2.12334696394373e-21	-0.555038177203656	0.053	0.351	3.29097545941639e-17	4	Efemp1
1810011O10Rik	2.95835180209642e-21	0.2849335896551	0.275	0.084	4.58514945806924e-17	4	1810011O10Rik
Tuba1a.1	5.74860692137659e-21	-0.502813924451866	0.275	0.554	8.90976586744157e-17	4	Tuba1a
Gm7676	7.34629552037577e-21	0.262110627942141	0.332	0.117	1.13860234270304e-16	4	Gm7676
Cd44.1	9.58740029639787e-21	-0.426117311161531	0.028	0.319	1.48595117193871e-16	4	Cd44
Serping1.2	1.21641087101611e-20	-0.760466868998104	0.255	0.526	1.88531520898787e-16	4	Serping1
Cxcl12.1	1.24849670469989e-20	0.860671305004824	0.482	0.238	1.93504504261437e-16	4	Cxcl12
Prrx1.4	1.39993095981472e-20	-0.524445513259291	0.061	0.351	2.16975299461683e-16	4	Prrx1
Timp2.3	2.06810642104529e-20	-0.577533301180396	0.364	0.621	3.2053581419781e-16	4	Timp2
Rps5	2.15238244956854e-20	0.346414586113864	0.98	0.903	3.33597755858628e-16	4	Rps5
Cpxm1.3	2.26154265728932e-20	-0.508322493547872	0.04	0.325	3.50516496453272e-16	4	Cpxm1
Rcn1.3	3.2294428742169e-20	-0.375790284600372	0.069	0.364	5.00531351074878e-16	4	Rcn1
Anxa2.1	3.32792857063823e-20	-0.487287768016308	0.777	0.875	5.15795649163219e-16	4	Anxa2
Add3.1	3.44373533927472e-20	-0.412580192742945	0.04	0.325	5.33744540234189e-16	4	Add3
Itm2b.2	4.15541122257826e-20	0.407453126970637	0.927	0.795	6.44047185387404e-16	4	Itm2b
Thbd	4.36104610804625e-20	0.370613635715489	0.385	0.158	6.75918536286089e-16	4	Thbd
Adamts2.2	6.82653543286238e-20	-0.399789375230429	0.028	0.304	1.05804472673934e-15	4	Adamts2
Sptbn1.1	7.44107063675753e-20	0.384066543532404	0.769	0.541	1.15329153799105e-15	4	Sptbn1
Gpx8.2	7.86241594332484e-20	-0.362074275319765	0.036	0.314	1.21859584705592e-15	4	Gpx8
C3.4	8.58972906984389e-20	-0.937954847989353	0.053	0.33	1.33132210853511e-15	4	C3
Gm6472.1	8.74184970683532e-20	0.426393735673691	0.619	0.387	1.35489928606241e-15	4	Gm6472
Adam10	1.20119996776408e-19	0.278694350669759	0.372	0.146	1.86173983003755e-15	4	Adam10
Prdx5.2	1.6691745298279e-19	-0.464615328953372	0.142	0.428	2.58705360378026e-15	4	Prdx5
Islr.3	2.88752700855291e-19	-0.375187068354302	0.012	0.275	4.47537811055615e-15	4	Islr
Tmem176a	3.87124870176092e-19	0.279610593350962	0.421	0.181	6.00004836285925e-15	4	Tmem176a
Sod3.2	4.38159929229475e-19	-0.392699485680289	0.032	0.303	6.79104074312763e-15	4	Sod3
mt-Co1	4.99541216162828e-19	0.358990872050831	0.567	0.318	7.74238930930766e-15	4	mt-Co1
Celf2	7.69934084425428e-19	-0.375603998949417	0.032	0.296	1.19332083745097e-14	4	Celf2
Dpt.3	7.73290110546746e-19	-0.737760611833154	0.036	0.302	1.1985223423364e-14	4	Dpt
S100a4.4	8.58528376583408e-19	-0.777329075423573	0.113	0.384	1.33063313086662e-14	4	S100a4
Oaf.3	9.04318653100194e-19	-0.382695713464882	0.032	0.297	1.40160348043999e-14	4	Oaf
Actn4	9.26456811875656e-19	0.31166104085334	0.575	0.308	1.43591541272608e-14	4	Actn4
Axl.1	9.48049009606215e-19	-0.364622932405188	0.032	0.297	1.46938115998867e-14	4	Axl
Pdgfra.2	1.05310781141703e-18	-0.322081790783423	0.004	0.256	1.63221179691526e-14	4	Pdgfra
Rpl6	1.19876479663516e-18	0.351342785150953	0.688	0.442	1.85796555830484e-14	4	Rpl6
Mfap2.2	2.14892862462724e-18	-0.334652537907651	0.008	0.258	3.33062447530977e-14	4	Mfap2
Igf1.3	2.69324743073423e-18	-0.705334677510885	0.263	0.514	4.17426419289498e-14	4	Igf1
Rps15	2.86034745920147e-18	0.293700722000892	0.972	0.921	4.43325252701635e-14	4	Rps15
Cthrc1.4	3.9425296273989e-18	-0.670178761137421	0.206	0.463	6.11052666950555e-14	4	Cthrc1
Lrrfip1	4.06679711727177e-18	0.267238354753073	0.34	0.131	6.30312885205952e-14	4	Lrrfip1
Rpl4.1	4.5477350014646e-18	0.326607461654473	0.96	0.913	7.04853447876999e-14	4	Rpl4
Foxp1	5.00754171434299e-18	0.337543490185738	0.433	0.206	7.7611889030602e-14	4	Foxp1
Ugdh.2	5.76438561895196e-18	-0.416521801852979	0.02	0.27	8.93422127081365e-14	4	Ugdh
Loxl1.2	5.98146630560899e-18	-0.362282722475515	0.028	0.281	9.27067462706337e-14	4	Loxl1
Cmip	6.1945192266263e-18	0.296518654252279	0.397	0.173	9.6008853493481e-14	4	Cmip
Thy1.2	6.44790675700671e-18	-0.461247191055929	0.077	0.34	9.9936106826847e-14	4	Thy1
Rplp0.1	7.88684110063111e-18	0.341371138126812	0.968	0.885	1.22238150218682e-13	4	Rplp0
Sfrp4.3	1.16400643875332e-17	-1.09160243098525	0.065	0.32	1.80409357942377e-13	4	Sfrp4
Txndc5.1	1.16519958286233e-17	-0.317174800726799	0.053	0.314	1.80594283347833e-13	4	Txndc5
Col16a1.1	1.78271913125892e-17	-0.320835034695178	0.028	0.276	2.7630363815382e-13	4	Col16a1
Maged2.2	2.40634827450186e-17	-0.327957546689287	0.04	0.295	3.72959919065044e-13	4	Maged2
Lox.3	2.49636408153885e-17	-0.707523497809172	0.081	0.332	3.86911468997707e-13	4	Lox
Anp32a	2.62354511836603e-17	0.318688318597992	0.591	0.338	4.06623257895551e-13	4	Anp32a
Cd248.3	2.95893290006756e-17	-0.422764014606155	0.028	0.274	4.58605010181471e-13	4	Cd248
Ctsk	3.0863485361732e-17	-0.303076575553383	0.012	0.251	4.78353159621485e-13	4	Ctsk
Npc2.1	3.19944515229398e-17	-0.426489779204793	0.372	0.614	4.95882004154044e-13	4	Npc2
Medag.1	3.89709235138402e-17	-0.329686216573474	0.02	0.264	6.04010343541009e-13	4	Medag
Ppap2b.3	5.21873194803313e-17	0.423075760279509	0.559	0.302	8.08851264625655e-13	4	Ppap2b
Sh3bgrl	5.74343995387659e-17	0.319673602883837	0.567	0.322	8.90175758451333e-13	4	Sh3bgrl
Calr.2	5.81620288991667e-17	-0.402436917586079	0.749	0.851	9.01453285908185e-13	4	Calr
Atp1b3	7.36581499528914e-17	0.262110627942141	0.445	0.212	1.14162766611986e-12	4	Atp1b3
Gnai2	8.50212692665826e-17	0.326328011166262	0.757	0.558	1.31774465236276e-12	4	Gnai2
Cd302	9.61545272632879e-17	-0.354131540669321	0.049	0.301	1.4902990180537e-12	4	Cd302
Plat.2	1.49489382950177e-16	-0.326970166025821	0.036	0.28	2.31693594634479e-12	4	Plat
Clec3b.4	1.52679262692194e-16	-0.696404297934794	0.024	0.259	2.36637589246631e-12	4	Clec3b
Lpar1.1	2.12400101014747e-16	-0.294420060280065	0.004	0.228	3.29198916562756e-12	4	Lpar1
Spp1.4	2.51829995199815e-16	-1.3871718642473	0.445	0.627	3.90311309560194e-12	4	Spp1
Aspn.4	3.06515664975191e-16	-0.536380931142271	0.049	0.287	4.75068629145049e-12	4	Aspn
Vcan.3	3.17182137162298e-16	-0.401731024197693	0.077	0.325	4.91600594387845e-12	4	Vcan
Ckap4.2	4.31701219123856e-16	-0.37122979662519	0.194	0.454	6.69093719520064e-12	4	Ckap4
Zeb2.3	4.62177518363223e-16	-0.407633144233643	0.081	0.336	7.16328935711159e-12	4	Zeb2
Col8a1.3	4.80913997400885e-16	-0.629817605771513	0.093	0.345	7.45368604571632e-12	4	Col8a1
Emilin2.1	7.92182995440666e-16	-0.308692891252222	0.016	0.244	1.22780442463349e-11	4	Emilin2
Maged1.3	7.99479023201495e-16	-0.330540049227864	0.101	0.348	1.23911253806e-11	4	Maged1
Scara5.2	8.29023156781525e-16	-0.357292344640763	0.008	0.227	1.28490299069569e-11	4	Scara5
Rpl37	9.17221548662535e-16	0.299223607435416	0.911	0.785	1.42160167827206e-11	4	Rpl37
Ebf2.3	1.34736413167283e-15	-0.285383173492999	0.016	0.237	2.08827966767971e-11	4	Ebf2
Tnxb.2	1.44544146487515e-15	-0.378435180346461	0.024	0.247	2.24028972641e-11	4	Tnxb
Ccl2.2	1.86712061625611e-15	-0.755746448569137	0.073	0.307	2.89385024313534e-11	4	Ccl2
Cox7a2l	2.02223846088607e-15	0.259879732416201	0.502	0.269	3.13426739052732e-11	4	Cox7a2l
Rarres2.2	2.05166852742908e-15	-0.41555207783037	0.089	0.34	3.17988105066233e-11	4	Rarres2
Nid1.3	2.78004649547295e-15	-0.424893833112006	0.336	0.578	4.30879406333352e-11	4	Nid1
Rps4x.1	2.85008533963838e-15	0.304654089204976	0.915	0.762	4.41734726790552e-11	4	Rps4x
Ifi202b	2.87370716810014e-15	-0.326247779228532	0.016	0.234	4.45395873983841e-11	4	Ifi202b
Il33.2	3.27006655089557e-15	-0.404713093510746	0.024	0.243	5.06827614723305e-11	4	Il33
Arf4.1	3.32939493113504e-15	-0.346883706612314	0.178	0.429	5.1602292037662e-11	4	Arf4
Atox1	3.73180056531573e-15	0.280653829179596	0.66	0.436	5.78391769618286e-11	4	Atox1
Rhob	4.32298561862446e-15	0.290245376845773	0.462	0.244	6.70019541030605e-11	4	Rhob
Ccl11.3	4.43741906662699e-15	-0.53700575687187	0.049	0.275	6.87755581136517e-11	4	Ccl11
Hsp90ab1	4.51611331049026e-15	0.279874981515663	0.996	0.967	6.99952401992886e-11	4	Hsp90ab1
Ccl9.4	4.52464077551637e-15	-0.483311858043344	0.012	0.224	7.01274073797282e-11	4	Ccl9
Fam46a	5.94304260214111e-15	-0.305912069125491	0	0.204	9.21112172905851e-11	4	Fam46a
Tpm3.1	5.99943924091983e-15	0.335616675546011	0.696	0.468	9.29853087950165e-11	4	Tpm3
Ddx3x	6.24540871683294e-15	0.253125182490642	0.462	0.238	9.67975897021938e-11	4	Ddx3x
Pdia6.3	9.55552515548509e-15	-0.362410536854614	0.304	0.544	1.48101084384863e-10	4	Pdia6
Rpl9-ps6	1.27491667216373e-14	0.336734580776002	0.599	0.396	1.97599335018656e-10	4	Rpl9-ps6
Vkorc1.1	1.2835136877597e-14	-0.334053887456076	0.097	0.33	1.98931786465876e-10	4	Vkorc1
Rrbp1.1	2.33171902135045e-14	-0.353445893472606	0.668	0.798	3.61393131119106e-10	4	Rrbp1
Ehd2.1	2.73232276348019e-14	0.256918559794094	0.393	0.194	4.23482705111794e-10	4	Ehd2
Mlec	4.22936111112633e-14	-0.257439290520752	0.045	0.262	6.5550867861347e-10	4	Mlec
Spop	4.92399103223817e-14	0.263630747121771	0.514	0.283	7.63169370086594e-10	4	Spop
Msn.1	4.93337266357059e-14	0.325686278848266	0.555	0.341	7.64623429126805e-10	4	Msn
Tmed3.1	5.05614858864615e-14	-0.309332332562184	0.121	0.359	7.83652469754268e-10	4	Tmed3
Phlda1.2	5.08015951122699e-14	-0.412248988576208	0.061	0.28	7.87373922645071e-10	4	Phlda1
H19.2	5.21364639417741e-14	-1.03197793809099	0.077	0.293	8.08063054633558e-10	4	H19
Fkbp9.1	5.50920884298351e-14	-0.281879547921377	0.101	0.338	8.53872278574014e-10	4	Fkbp9
Chd3	5.65598075881969e-14	-0.259263263172422	0.04	0.258	8.76620457809463e-10	4	Chd3
Maf.3	6.08266089117635e-14	-0.348858329536811	0.032	0.244	9.42751611523422e-10	4	Maf
Cstb.2	6.1440516420757e-14	-0.448455750638347	0.142	0.366	9.52266564005313e-10	4	Cstb
Kdelr2.2	6.2252008546691e-14	-0.293969143579284	0.138	0.379	9.64843880465164e-10	4	Kdelr2
Sdc4	6.64471901600483e-14	-0.269781167560761	0.016	0.217	1.02986500029059e-09	4	Sdc4
Rpl22	6.66492008195221e-14	0.277598820747649	0.96	0.863	1.03299596350177e-09	4	Rpl22
Ptma.1	1.10859203363438e-13	0.2753408796169	0.599	0.374	1.71820679292992e-09	4	Ptma
Rpl23	1.18857760758809e-13	0.283960066774312	0.947	0.852	1.84217643400079e-09	4	Rpl23
Efemp2.1	1.36059784245617e-13	-0.269140966744792	0.069	0.288	2.10879059602282e-09	4	Efemp2
Tgfbi.3	1.36315094103731e-13	-0.677343063867512	0.247	0.452	2.11274764351373e-09	4	Tgfbi
Atp5j	1.45601955991064e-13	0.264977122013311	0.502	0.283	2.2566847159055e-09	4	Atp5j
Filip1l.2	1.47934973794239e-13	0.304204641170304	0.433	0.226	2.29284415883692e-09	4	Filip1l
Top1	1.71234257738761e-13	0.337228570957028	0.534	0.326	2.65395976069306e-09	4	Top1
Htra1.3	2.0345129415109e-13	-0.29003443182385	0.065	0.278	3.15329160804774e-09	4	Htra1
C1ra.2	2.07434169050689e-13	-0.350853923838017	0.061	0.274	3.21502218611663e-09	4	C1ra
Ccl7.2	2.3209037058011e-13	-0.442093424641425	0.036	0.24	3.59716865362113e-09	4	Ccl7
Abca8a.4	2.84166489640992e-13	-0.333831407438631	0.032	0.23	4.40429642294574e-09	4	Abca8a
Pi16.3	3.47936071738476e-13	-0.655270773773845	0.036	0.237	5.39266117587464e-09	4	Pi16
Bmp1.2	4.00347380476022e-13	-0.271159503733258	0.049	0.255	6.20498404999787e-09	4	Bmp1
Gas1.2	5.124630947081e-13	-0.28957639843459	0.02	0.211	7.94266550488084e-09	4	Gas1
Gda.2	7.39085550743001e-13	0.303174975720574	0.417	0.22	1.14550869509658e-08	4	Gda
Ddr2.2	8.54987103059724e-13	-0.25451518000046	0.028	0.224	1.32514451103227e-08	4	Ddr2
Rps28	1.1984985463896e-12	0.273107173502675	0.761	0.607	1.85755289704924e-08	4	Rps28
Ndufa6	1.65812196841647e-12	0.286486867934841	0.543	0.337	2.56992323884868e-08	4	Ndufa6
Pdia3.2	1.6650336289805e-12	-0.2844477895203	0.555	0.723	2.58063562155688e-08	4	Pdia3
Serinc3.2	1.70386266859476e-12	0.254860888684628	0.538	0.329	2.64081675005502e-08	4	Serinc3
Calu.1	2.17267953611717e-12	-0.295894273814292	0.227	0.453	3.367436013028e-08	4	Calu
Pmepa1.3	2.29372577281024e-12	-0.311745764147749	0.057	0.259	3.55504557527859e-08	4	Pmepa1
Serpine2.3	2.62884214245273e-12	-0.536627443100359	0.065	0.263	4.07444243658749e-08	4	Serpine2
Basp1	2.80027174161014e-12	-0.254750480507442	0.004	0.176	4.34014117232156e-08	4	Basp1
Smarca2	2.8158873585367e-12	0.326441847174231	0.425	0.233	4.36434381699604e-08	4	Smarca2
Fbln5	3.0985262764202e-12	0.283817302481673	0.308	0.144	4.80240587582367e-08	4	Fbln5
Cebpb.3	3.56841026108594e-12	-0.475036515914406	0.085	0.284	5.5306790636571e-08	4	Cebpb
Fxyd1.2	3.62934230585683e-12	-0.266987590822681	0.057	0.253	5.62511763984751e-08	4	Fxyd1
Sdc2.2	3.67283764238498e-12	-0.255263123191648	0.045	0.234	5.69253106193248e-08	4	Sdc2
Rpl7	3.8587094457221e-12	0.282197036341297	0.551	0.349	5.98061376992469e-08	4	Rpl7
Ctss.4	3.97115979210826e-12	-0.840733259354292	0.02	0.198	6.1549005617886e-08	4	Ctss
Cyba.2	4.53675089184613e-12	-0.421830637268303	0.121	0.326	7.03151020727232e-08	4	Cyba
Csnk1a1	5.41371846351493e-12	0.292924405210402	0.599	0.398	8.3907222466018e-08	4	Csnk1a1
Surf4	6.09768466925892e-12	-0.255102136408848	0.117	0.328	9.4508014688844e-08	4	Surf4
Cp.3	6.93203542128126e-12	-0.628006367221017	0.049	0.236	1.07439616994438e-07	4	Cp
Thbs4.3	7.73865529059813e-12	-0.468064376117356	0.028	0.208	1.1994141834898e-07	4	Thbs4
Cwc22	8.29943450225928e-12	0.328660089127498	0.372	0.199	1.28632935350517e-07	4	Cwc22
Htra3.3	9.29425898639138e-12	-0.413393345380352	0.053	0.239	1.4405172003008e-07	4	Htra3
Gbp2	1.03357355721587e-11	0.268914884094186	0.202	0.076	1.60193565632888e-07	4	Gbp2
Arpc3	1.15924929662821e-11	0.253501269168588	0.494	0.299	1.79672048484406e-07	4	Arpc3
Plac8.2	1.23656500802989e-11	-0.386667913325315	0.032	0.21	1.91655210594553e-07	4	Plac8
Fndc1.3	1.30314210876933e-11	-0.341630633173951	0.024	0.199	2.01973995438159e-07	4	Fndc1
Gas7.1	1.46005570507829e-11	-0.295651045126007	0.069	0.261	2.26294033730084e-07	4	Gas7
Tyrobp.4	1.77325504300159e-11	-0.470243262928508	0.028	0.2	2.74836799114817e-07	4	Tyrobp
Ahnak.1	2.52247540779957e-11	-0.353156219932043	0.66	0.774	3.90958463454856e-07	4	Ahnak
Ecm1.1	2.8206115172462e-11	-0.294336952031524	0.109	0.306	4.37166579057988e-07	4	Ecm1
Lyz2.4	3.1072967790134e-11	-1.54633943211481	0.158	0.343	4.81599927779286e-07	4	Lyz2
Smoc2.2	3.59524637932587e-11	-0.341110048549773	0.02	0.186	5.57227236331716e-07	4	Smoc2
Fbn2.2	3.65873937291224e-11	-0.299269911233668	0.004	0.161	5.67068015407668e-07	4	Fbn2
Lgals3.3	3.91697363029608e-11	-0.608927441995274	0.166	0.358	6.0709174295959e-07	4	Lgals3
Myl12b	4.66072045531096e-11	0.272208054233482	0.522	0.342	7.22365063368645e-07	4	Myl12b
Sema3c.3	6.77508843996872e-11	-0.33644690661607	0.024	0.188	1.05007095731075e-06	4	Sema3c
Gpx3.4	6.96321393864273e-11	-0.419909513245262	0.057	0.234	1.07922852835024e-06	4	Gpx3
Fcer1g.4	6.99071639419619e-11	-0.39415193924208	0.02	0.181	1.08349113393647e-06	4	Fcer1g
Laptm5.4	7.51547692614372e-11	-0.370746412039116	0.012	0.169	1.16482376878302e-06	4	Laptm5
Ctsh.2	8.33841371432513e-11	-0.260127281929637	0.073	0.263	1.29237074158325e-06	4	Ctsh
Klf2.3	8.65219190408842e-11	0.371059224225307	0.429	0.257	1.34100322321466e-06	4	Klf2
Tppp3.1	1.16986343535079e-10	-0.292950391728954	0.077	0.261	1.81317133845019e-06	4	Tppp3
Tpm3-rs7.1	1.20453399986829e-10	0.259696455269377	0.51	0.319	1.86690724639586e-06	4	Tpm3-rs7
Cxcl14.4	1.9208302856647e-10	-0.532152428107409	0.02	0.176	2.97709485975172e-06	4	Cxcl14
Itm2a.3	1.96841577063258e-10	-0.305986305419649	0.138	0.339	3.05084760290344e-06	4	Itm2a
Cbx1	2.52146753561915e-10	0.266176389561089	0.409	0.243	3.90802253345613e-06	4	Cbx1
Cd52.4	2.62411355077587e-10	-0.371980599602495	0	0.142	4.06711359234752e-06	4	Cd52
Errfi1.2	3.21181584565948e-10	-0.298402078497897	0.069	0.242	4.97799337918763e-06	4	Errfi1
Fbln1.3	3.97012204025768e-10	-0.279132484596278	0.028	0.186	6.15329215019537e-06	4	Fbln1
Atrx	4.0497089391837e-10	0.341367712477951	0.51	0.348	6.27664388484081e-06	4	Atrx
Crip1.2	4.50794259529653e-10	-0.448107620453867	0.765	0.865	6.98686022845009e-06	4	Crip1
Angptl1.3	4.62121008727802e-10	-0.296588861559706	0	0.139	7.1624135142722e-06	4	Angptl1
Rdx	4.97111898319844e-10	0.28108225804168	0.474	0.3	7.70473731205926e-06	4	Rdx
Cygb.1	5.25493630800497e-10	-0.373861539642006	0.113	0.289	8.1446257837769e-06	4	Cygb
Ctnnb1	5.48673823772441e-10	0.259382574010933	0.538	0.365	8.50389559464906e-06	4	Ctnnb1
Nfix.4	6.98750548193756e-10	-0.26568785929818	0.101	0.282	1.0829934746455e-05	4	Nfix
Rpl34	8.51149816068918e-10	0.251414171450033	0.761	0.633	1.31919709992522e-05	4	Rpl34
Tnfaip6.3	9.29769940450873e-10	-0.27972776359364	0.032	0.186	1.44105043070481e-05	4	Tnfaip6
Mpeg1.4	1.10416617768953e-09	-0.388778939370871	0.016	0.159	1.71134715880101e-05	4	Mpeg1
Tnc.3	1.47856490250995e-09	-0.496850092385635	0.053	0.21	2.29162774240017e-05	4	Tnc
Trf.3	1.48980191334696e-09	-0.72926920742321	0.081	0.243	2.30904398549646e-05	4	Trf
Nbl1.2	1.81648935217705e-09	-0.335636958033156	0.081	0.241	2.81537684693922e-05	4	Nbl1
Il11ra1.2	1.87109612317196e-09	-0.276726170945146	0.057	0.215	2.90001188130423e-05	4	Il11ra1
Col12a1.3	2.02498001399064e-09	-0.265820766344664	0.016	0.158	3.1385165236841e-05	4	Col12a1
Cybb.4	2.10352808311021e-09	-0.422125289891993	0.012	0.149	3.26025817601252e-05	4	Cybb
Sfrp2.3	2.47020937464642e-09	-0.383600113658607	0.012	0.148	3.82857750976449e-05	4	Sfrp2
Sfrp1.3	3.81707220135369e-09	-0.356972936000325	0.02	0.159	5.91608020487808e-05	4	Sfrp1
S100a11.2	5.73824626624156e-09	-0.286211886470321	0.709	0.795	8.89370788804779e-05	4	S100a11
Ccl6.4	5.79241107687217e-09	-0.529152244375882	0.02	0.155	8.97765792804417e-05	4	Ccl6
Mt1	6.3895175851369e-09	-0.361480832439515	0.182	0.359	9.90311330520369e-05	4	Mt1
Igfbp4.2	6.53079431621389e-09	-0.515858070801657	0.688	0.734	0.000101220781106999	4	Igfbp4
C4b.3	6.89034494396811e-09	-0.323532991942078	0.036	0.178	0.000106793456286562	4	C4b
Adamts5.3	7.54876145747046e-09	-0.257094064924877	0.045	0.193	0.000116998253829335	4	Adamts5
Swi5.2	1.12201352931265e-08	-0.254257730703677	0.247	0.42	0.000173900876908167	4	Swi5
Lpl.3	1.30735820487463e-08	-0.528907131316256	0.101	0.267	0.000202627448173519	4	Lpl
Cfh	1.32508697936437e-08	-0.335415143550874	0.032	0.169	0.000205375230931684	4	Cfh
Ptprc.4	1.58589071475485e-08	-0.270011746796672	0	0.116	0.000245797201879854	4	Ptprc
Ier3.2	3.24816996954483e-08	0.311877283967246	0.372	0.219	0.000503433863579754	4	Ier3
Grb10.2	3.41949223921498e-08	-0.263707448013959	0.117	0.274	0.000529987102155929	4	Grb10
Cilp.3	3.75606915089979e-08	-0.370653039904406	0.02	0.144	0.000582153157697958	4	Cilp
Wif1.3	3.83136992180862e-08	-0.2756416202477	0.016	0.138	0.000593824024181118	4	Wif1
Ccr2.4	3.86075117209688e-08	-0.46408645969587	0.008	0.124	0.000598377824163295	4	Ccr2
Nrp1.2	4.18010091528479e-08	0.314641743424894	0.595	0.418	0.000647873840859989	4	Nrp1
S100a10	1.18310731320811e-07	-0.278873676945672	0.688	0.772	0.00183369802474125	4	S100a10
Fth1.2	1.19832457686409e-07	-0.442951390725742	0.984	0.986	0.00185728326168166	4	Fth1
Serpine1.1	1.74186314818381e-07	-0.251388805275173	0.032	0.153	0.00269971369337008	4	Serpine1
Dkk2.3	3.06858884578751e-07	-0.309072379563705	0.028	0.143	0.00475600585208606	4	Dkk2
Il6st.2	3.58523997772304e-07	0.30322630647027	0.551	0.415	0.00555676344147293	4	Il6st
Mir692-1.1	3.63841568075026e-07	-0.27398795191694	0.162	0.308	0.00563918046359482	4	Mir692-1
Lmna.1	6.55980739498273e-07	-0.291054595303901	0.389	0.504	0.0101670454814837	4	Lmna
Plin2.1	7.38361547828248e-07	-0.260230433201068	0.061	0.181	0.01144386562979	4	Plin2
Nov.3	8.5758782611282e-07	-0.271262203012742	0.028	0.136	0.0132917537169226	4	Nov
Penk.3	1.55845326438362e-06	-0.258046115725812	0.049	0.166	0.0241544671446817	4	Penk
Rpl26	1.79758814560018e-06	0.303381665583172	0.401	0.283	0.0278608186686572	4	Rpl26
Psap.3	3.43330366623829e-06	-0.510650971986406	0.453	0.562	0.0532127735230272	4	Psap
Mmp3.3	3.98283142966754e-06	-0.258323854930486	0.012	0.101	0.0617299043284172	4	Mmp3
H2-Aa.4	4.07422207496042e-06	-0.804942386394928	0.032	0.131	0.0631463679398115	4	H2-Aa
Gpnmb.4	4.2036069348872e-06	-0.426085676103557	0.028	0.127	0.0651517038838167	4	Gpnmb
Cd74.4	4.34402900048193e-06	-1.18594615281419	0.061	0.168	0.0673281054784695	4	Cd74
Gatm.4	6.40651884784435e-06	-0.255163819195749	0.028	0.123	0.0992946356227395	4	Gatm
Wfdc17.4	9.20080644260472e-06	-0.295185448234644	0.02	0.108	0.142603299053931	4	Wfdc17
Adamts1.1	1.23923125942177e-05	0.320246154866709	0.328	0.217	0.192068452897779	4	Adamts1
H2-Ab1.4	2.94978263869913e-05	-0.761515853841406	0.045	0.135	0.457186811171977	4	H2-Ab1
Cxcl2.4	3.83835778340772e-05	-0.885286264041587	0.061	0.152	0.594907072850362	4	Cxcl2
Rgs2.3	5.73404822525732e-05	-0.261218417296013	0.069	0.163	0.888720134432632	4	Rgs2
Cald1.2	6.40085259938596e-05	-0.30360815047414	0.526	0.626	0.99206814437883	4	Cald1
Igfbp3.2	6.80649295685312e-05	-0.268826577129635	0.109	0.212	1	4	Igfbp3
Dusp1.2	0.0018335487530023	-0.398206674876959	0.36	0.431	1	4	Dusp1
Cxcl1.1	0.00480691059583437	-0.272242189340976	0.13	0.197	1	4	Cxcl1
Clec11a	1.74827380111255e-200	0.959989850973603	0.675	0.029	2.70964956434435e-196	5	Clec11a
Mfap4.1	4.83122097976776e-145	1.02886371218216	0.694	0.061	7.48790939654204e-141	5	Mfap4
Ltbp4.1	1.05718803830389e-119	0.996011585666574	0.825	0.133	1.6385357405672e-115	5	Ltbp4
Inmt	8.29442350146249e-114	1.2272167374082	0.388	0.016	1.28555269849167e-109	5	Inmt
Gdf10.2	2.44449092671523e-109	1.08449490853317	0.644	0.077	3.78871648731593e-105	5	Gdf10
Cilp.4	5.67013151213814e-99	1.18328735502463	0.656	0.09	8.7881368306629e-95	5	Cilp
Fbln7	1.09941689770939e-97	0.626215803456432	0.444	0.032	1.70398624975978e-93	5	Fbln7
Itgbl1	1.98142695185409e-96	0.5778715385753	0.444	0.033	3.07101363267865e-92	5	Itgbl1
Fbln1.4	1.33970806343767e-93	0.949566769890794	0.725	0.126	2.07641352752205e-89	5	Fbln1
Cfh.1	1.3030189288907e-92	1.27503995419073	0.681	0.113	2.01954903788769e-88	5	Cfh
Cygb.2	5.43645951500313e-91	1.08298683547265	0.875	0.223	8.42596860230335e-87	5	Cygb
Comp	1.14405389436046e-89	0.752038383714523	0.288	0.01	1.77316913086928e-85	5	Comp
Sfrp1.4	3.86314914961256e-85	1.04370748513137	0.65	0.104	5.98749486698451e-81	5	Sfrp1
Sfrp4.4	8.10119138372212e-85	2.15927784818493	0.844	0.249	1.25560365256309e-80	5	Sfrp4
Pdgfrl	1.57669876069066e-80	0.681297685909383	0.588	0.089	2.44372540919445e-76	5	Pdgfrl
Svep1	1.65223644362253e-80	0.573936382627258	0.512	0.062	2.56080126397055e-76	5	Svep1
Chrdl1	2.71291237928568e-80	0.802838423765818	0.606	0.099	4.20474289665487e-76	5	Chrdl1
Gas6.2	4.36457452510287e-79	1.03425796764208	0.7	0.135	6.76465405645694e-75	5	Gas6
Serping1.3	8.91424444795018e-77	1.34318187603114	0.956	0.461	1.3816187469878e-72	5	Serping1
Serpina3n	5.81392033334697e-75	0.72195589401919	0.506	0.068	9.01099512465447e-71	5	Serpina3n
Podn	2.21279177646882e-72	0.392020281499865	0.406	0.04	3.42960597434902e-68	5	Podn
Serpinf1.3	3.78535961049551e-71	1.02410672013889	0.906	0.345	5.86692886030699e-67	5	Serpinf1
Col1a2.4	1.86394818877618e-69	1.37909866425294	1	0.903	2.88893329778421e-65	5	Col1a2
C2	6.31185139019567e-69	0.506039571059935	0.45	0.056	9.78273846966427e-65	5	C2
Clec3b.5	1.27437915735533e-67	0.825474933832708	0.806	0.188	1.97516025598502e-63	5	Clec3b
Dcn.5	2.70294164089595e-65	1.39866357997481	1	0.855	4.18928924922464e-61	5	Dcn
Gsn.5	5.92767878853918e-64	1.37695772212241	0.994	0.688	9.18730935435688e-60	5	Gsn
F3	1.02425904369699e-63	0.759588123487912	0.475	0.072	1.58749909182596e-59	5	F3
Ogn.3	3.1827638339768e-62	1.26300170421181	0.9	0.369	4.93296566628064e-58	5	Ogn
Ism1	3.79009060871032e-62	0.328752972162782	0.25	0.014	5.87426143444013e-58	5	Ism1
Mgp.3	2.16918032059203e-61	1.61103909622259	0.9	0.44	3.36201257888559e-57	5	Mgp
Col3a1.4	2.96056789019509e-61	1.20532614105845	1	0.917	4.58858417301337e-57	5	Col3a1
Col1a1.3	3.35557533342458e-58	1.28205122165938	1	0.884	5.20080620927476e-54	5	Col1a1
Fxyd6	3.44440163665227e-58	0.384525319134854	0.412	0.055	5.33847809664735e-54	5	Fxyd6
Bgn.3	2.2147844061281e-57	1.10517898145716	0.981	0.67	3.43269435105794e-53	5	Bgn
Il11ra1.3	3.8281343033105e-56	0.687296291159201	0.65	0.162	5.93322535670094e-52	5	Il11ra1
Sparc.2	4.5103324982884e-55	1.05581217253102	1	0.946	6.99056433909719e-51	5	Sparc
Nbl1.3	2.72992961713946e-54	0.821082022272401	0.688	0.188	4.23111791360444e-50	5	Nbl1
Ccdc3	4.15182560809661e-54	0.538660973682079	0.462	0.077	6.43491450998894e-50	5	Ccdc3
Igfbp6.3	1.48188364149042e-53	1.41506189368509	0.906	0.475	2.296771455946e-49	5	Igfbp6
Ccdc80.4	5.31850561305161e-52	0.912099023278698	0.856	0.338	8.24315184966869e-48	5	Ccdc80
Pcolce.3	7.57448426219829e-52	0.933132723366315	0.881	0.415	1.17396931579811e-47	5	Pcolce
C1s.3	1.13742626681735e-51	0.730674666192658	0.85	0.313	1.76289697094021e-47	5	C1s
Smoc2.3	1.36907873707266e-51	0.696607455997396	0.581	0.136	2.12193513458891e-47	5	Smoc2
Fmo2	1.64847180822929e-51	0.440953465891243	0.35	0.044	2.55496645557457e-47	5	Fmo2
C1ra.3	3.59956714762521e-51	0.611594623148224	0.731	0.213	5.57896912210431e-47	5	C1ra
Fmod	4.5023753465741e-50	0.406365657146068	0.181	0.008	6.9782315496552e-46	5	Fmod
Adamts2.3	2.77381974423638e-48	0.700957470101285	0.725	0.239	4.29914322159196e-44	5	Adamts2
Lbp.2	5.87417931883798e-48	0.833054724282017	0.569	0.141	9.10439052626699e-44	5	Lbp
Spon1	2.64439131181003e-46	0.344188628277028	0.281	0.03	4.09854209417436e-42	5	Spon1
1500015O10Rik	3.99199849159191e-45	0.499057787321443	0.269	0.029	6.18719846211831e-41	5	1500015O10Rik
Shisa3	1.81361051686606e-44	0.360139452275188	0.281	0.032	2.8109149400907e-40	5	Shisa3
Pmepa1.4	9.03505708878422e-44	0.627233517032679	0.669	0.203	1.40034349819067e-39	5	Pmepa1
Cst3.4	1.26090218434847e-43	0.975421807086229	0.963	0.782	1.95427229552169e-39	5	Cst3
Timp2.4	4.18466727673428e-43	0.739298876406469	0.938	0.566	6.48581581221047e-39	5	Timp2
Tnxb.3	9.65210806751865e-43	0.601863919033436	0.644	0.19	1.49598022938472e-38	5	Tnxb
Nfib.4	2.82867088715303e-42	0.689938582940434	0.812	0.331	4.38415700799849e-38	5	Nfib
Ar	1.34305217071331e-41	0.355191701621359	0.325	0.048	2.08159655938856e-37	5	Ar
Cd302.1	2.19422296099384e-40	0.648995851736458	0.688	0.241	3.40082616724435e-36	5	Cd302
Col14a1.5	4.42319427988183e-40	0.670661550754488	0.812	0.311	6.85550881438885e-36	5	Col14a1
Igsf10	1.05088579132008e-39	0.349153353003666	0.388	0.073	1.62876788796699e-35	5	Igsf10
Rnase4.3	7.10383402367355e-39	0.723146696605536	0.9	0.505	1.10102323532916e-34	5	Rnase4
Col5a2.4	8.15320629702969e-38	0.695701132445224	0.969	0.654	1.26366544397663e-33	5	Col5a2
Mmp3.4	8.32693877655272e-38	0.849214887853315	0.369	0.07	1.29059224097791e-33	5	Mmp3
Igfbp7.2	1.91448517797813e-37	0.750631948625895	0.981	0.842	2.9672605773483e-33	5	Igfbp7
Dkk3	9.08731613311012e-36	0.277498796945108	0.288	0.043	1.40844312747074e-31	5	Dkk3
Cfb.1	2.07925298967778e-35	0.429654220844918	0.4	0.086	3.22263420870159e-31	5	Cfb
Tspan11	7.86145398915622e-35	0.346680019614801	0.344	0.066	1.21844675377932e-30	5	Tspan11
Hmcn2	2.40056705933233e-34	0.255715813409332	0.231	0.028	3.72063888525917e-30	5	Hmcn2
Lrp6.1	8.81920067472893e-34	0.482643175093378	0.6	0.198	1.36688791257624e-29	5	Lrp6
Actb.3	4.58882234508826e-33	-0.813496295672534	0.963	0.994	7.1122157526523e-29	5	Actb
Ndrg2	7.36442410593448e-33	0.342466272314286	0.356	0.073	1.14141209217879e-28	5	Ndrg2
Vkorc1.2	1.57186096771922e-32	0.541994432761814	0.681	0.275	2.43622731386802e-28	5	Vkorc1
Cxcl14.5	1.73364282397771e-32	1.12892614580574	0.469	0.135	2.68697301288305e-28	5	Cxcl14
Angptl1.4	2.03827931231251e-32	0.755991663291295	0.406	0.101	3.15912910615316e-28	5	Angptl1
Olfml3.3	8.55461373234804e-32	0.574217093545819	0.669	0.264	1.32587958237662e-27	5	Olfml3
Lepr	4.17848870849622e-31	0.453724780502703	0.362	0.08	6.4762396492983e-27	5	Lepr
Rarres2.3	7.66800682238027e-31	0.62794015417314	0.688	0.283	1.18846437740072e-26	5	Rarres2
Srpx	2.08526094281393e-30	0.385219063897651	0.481	0.137	3.23194593526731e-26	5	Srpx
Sod3.3	3.11079769347732e-30	0.510805768888249	0.644	0.245	4.8214253451205e-26	5	Sod3
Mmp23.1	3.22142041276902e-30	0.327954095837662	0.506	0.148	4.9928794977507e-26	5	Mmp23
Zbtb20.2	3.31193490011568e-30	0.608206836845536	0.787	0.39	5.1331679016893e-26	5	Zbtb20
Rcn3.4	5.71968966574906e-30	0.637377214145316	0.787	0.416	8.86494701294446e-26	5	Rcn3
Igfbp4.3	1.38740862385083e-29	0.728680811050148	0.925	0.714	2.15034462610641e-25	5	Igfbp4
Mfap5.5	2.03355021336111e-29	0.533611537406463	0.819	0.377	3.15179947568839e-25	5	Mfap5
Hoxa10	4.1434389288589e-29	0.265715081231694	0.275	0.049	6.4219159958384e-25	5	Hoxa10
Gas1.3	6.43045074288692e-29	0.493292865014266	0.512	0.165	9.96655560640044e-25	5	Gas1
Tmed3.2	2.03685855499842e-28	0.451625786878358	0.706	0.304	3.15692707439206e-24	5	Tmed3
Nfix.5	2.07260727394527e-28	0.399051952863546	0.631	0.233	3.21233401388778e-24	5	Nfix
Lox.4	2.21412151612926e-28	0.688066729327526	0.669	0.276	3.43166693784875e-24	5	Lox
Aspn.5	7.4100621468426e-28	0.505615568417614	0.631	0.232	1.14848553213914e-23	5	Aspn
Rbp1.2	9.94981812897257e-28	0.517539148652796	0.65	0.261	1.54212231180946e-23	5	Rbp1
Nucb2	1.31332187969022e-27	0.451329818912974	0.55	0.199	2.03551758133187e-23	5	Nucb2
Dpt.4	2.52896723699483e-27	0.390961795729638	0.675	0.241	3.91964632061829e-23	5	Dpt
Ptch2	3.38901730026371e-27	0.29551856208321	0.281	0.055	5.25263791367872e-23	5	Ptch2
Lamb2.1	3.71815926681102e-27	0.43844655981558	0.544	0.194	5.7627750476304e-23	5	Lamb2
Col5a1.4	5.24271760003468e-27	0.501962274150995	0.794	0.402	8.12568800829375e-23	5	Col5a1
Tmsb4x.5	6.06732091696053e-27	-0.935649447297125	0.944	0.984	9.40374068919713e-23	5	Tmsb4x
Bace2	6.84171705401964e-27	0.310683336301605	0.269	0.052	1.0603977262025e-22	5	Bace2
Gstm1.1	9.20491167e-27	0.327020824654663	0.45	0.131	1.4266692597333e-22	5	Gstm1
Gm5077.1	9.26862586820669e-27	0.348820052997247	0.419	0.117	1.43654432331335e-22	5	Gm5077
Dpep1.1	1.10227849423601e-26	0.489930684571803	0.375	0.1	1.7084214382164e-22	5	Dpep1
Ctsk.1	7.53707119131468e-26	0.457461024709513	0.537	0.2	1.16817066394186e-21	5	Ctsk
C3.5	8.6571741132445e-26	0.552548167324149	0.662	0.271	1.34177541581176e-21	5	C3
Crispld2.1	1.41985921786342e-25	0.336399078915113	0.388	0.103	2.20063980176652e-21	5	Crispld2
Sparcl1.3	1.52628097095314e-25	0.646120911232431	0.794	0.467	2.36558287688028e-21	5	Sparcl1
2810055G20Rik.1	8.4302828124107e-25	0.308730056287674	0.456	0.14	1.30660953309553e-20	5	2810055G20Rik
Fgf7	1.37527592588491e-24	0.31403924901551	0.35	0.091	2.13154015752902e-20	5	Fgf7
Peg3.1	2.6764806438048e-24	0.409251885618719	0.406	0.121	4.14827734983306e-20	5	Peg3
Itih5.3	3.38492171430731e-24	0.47369948964322	0.506	0.174	5.2462901650049e-20	5	Itih5
Gnas.4	7.11657019943967e-24	0.770840990638541	0.956	0.881	1.10299721521115e-19	5	Gnas
Prrx1.5	1.04245143749545e-23	0.398460095262643	0.694	0.29	1.61569548297419e-19	5	Prrx1
Calm1.2	1.11835048266909e-23	-0.652464007763835	0.713	0.929	1.73333141308883e-19	5	Calm1
Sepp1.2	1.21893315376229e-23	0.510011501580642	0.819	0.484	1.88922449501617e-19	5	Sepp1
Fkbp7.1	1.96058518968299e-23	0.39453222051984	0.544	0.215	3.03871098548967e-19	5	Fkbp7
Meox2	2.74225241221661e-23	0.3133132688248	0.388	0.114	4.25021701369452e-19	5	Meox2
Pcolce2.1	8.35738011512491e-23	0.327020824654663	0.325	0.082	1.29531034404321e-18	5	Pcolce2
Adam33.1	2.75896044543437e-22	0.265919269874955	0.288	0.068	4.27611279437872e-18	5	Adam33
Pcsk5	3.86152312496529e-22	0.369489769021715	0.394	0.123	5.98497469138371e-18	5	Pcsk5
Htra3.4	4.33648491957023e-22	0.277911833764851	0.544	0.193	6.7211179768419e-18	5	Htra3
Col6a1.4	7.09299697047801e-22	0.45750736189946	0.806	0.478	1.09934360045439e-17	5	Col6a1
Olfml2b.1	7.21552280482554e-22	0.355930141808684	0.462	0.161	1.11833387951991e-17	5	Olfml2b
Ccl8	1.13795963734576e-21	0.422304352362133	0.281	0.069	1.76372364192219e-17	5	Ccl8
Tshz2.2	1.17225987326968e-21	0.392198527661231	0.512	0.196	1.81688557758068e-17	5	Tshz2
Igf1.4	1.19397931304439e-21	0.47058532150806	0.819	0.46	1.8505485372875e-17	5	Igf1
Mmp2.4	1.1105645280012e-20	0.44347833852422	0.844	0.536	1.72126396194906e-16	5	Mmp2
Fkbp9.2	1.29518206201986e-20	0.377416754988726	0.625	0.287	2.00740267792458e-16	5	Fkbp9
Cpxm2	1.48646002214455e-20	0.26083562932191	0.162	0.025	2.30386438832183e-16	5	Cpxm2
Cpxm1.4	1.57245804311505e-20	0.392230962548199	0.625	0.268	2.43715272102402e-16	5	Cpxm1
Mfap2.3	1.78011213530475e-20	0.401495164279052	0.506	0.209	2.75899579850883e-16	5	Mfap2
Col6a2.4	1.87712438634994e-20	0.4356355870584	0.8	0.457	2.90935508640377e-16	5	Col6a2
Cfl1.2	2.05067208814669e-20	-0.549668169104466	0.331	0.675	3.17833666941856e-16	5	Cfl1
Pam.1	2.91390347130811e-20	0.365852824939818	0.55	0.227	4.51625899018044e-16	5	Pam
Fbln2.3	4.40078462162656e-20	0.489182228228	0.731	0.388	6.820776085059e-16	5	Fbln2
Lrrc58.2	6.18208646523531e-20	-0.606290136466679	0.369	0.703	9.5816158124682e-16	5	Lrrc58
Prg4.1	6.89789372240628e-20	0.518294106730409	0.281	0.073	1.06910454803575e-15	5	Prg4
Abi3bp	2.46545995321182e-19	0.337886176014602	0.419	0.149	3.82121638148299e-15	5	Abi3bp
Tcf7l2	3.57509452541827e-19	0.33823536478628	0.325	0.099	5.54103900494578e-15	5	Tcf7l2
Slit3	1.36536876256119e-18	0.28810540840499	0.35	0.113	2.11618504509359e-14	5	Slit3
Serpinh1.3	1.56878566324246e-18	0.396806661301357	0.938	0.76	2.4314608994595e-14	5	Serpinh1
Ecm1.2	1.58687904947416e-18	0.3944375328295	0.562	0.263	2.45950383878001e-14	5	Ecm1
Vim.1	1.82392555507332e-18	-0.602298334008823	0.925	0.967	2.82690221780815e-14	5	Vim
Naalad2	2.22881558298588e-18	0.327707873805701	0.369	0.125	3.45444127206982e-14	5	Naalad2
Fgl2	6.55960225461599e-18	0.398174584910954	0.344	0.113	1.01667275344293e-13	5	Fgl2
Dhrs3.1	1.24596205920125e-17	0.285395242179733	0.412	0.149	1.93111659555602e-13	5	Dhrs3
Nenf	2.2604515898698e-17	0.361240240287248	0.544	0.253	3.50347391913921e-13	5	Nenf
Adamtsl1	4.08541508512521e-17	0.284200827471735	0.325	0.105	6.33198484043557e-13	5	Adamtsl1
Leprel2	4.56527177754977e-17	0.307373827270866	0.456	0.186	7.07571472802439e-13	5	Leprel2
Ntn1	4.89604284515766e-17	0.290517274697651	0.3	0.091	7.58837680570986e-13	5	Ntn1
Hsp90ab1.1	4.9688108127374e-17	-0.427327512762189	0.831	0.981	7.70115987866169e-13	5	Hsp90ab1
Prelp.2	6.05805554494135e-17	0.406460820105032	0.475	0.207	9.3893802891046e-13	5	Prelp
Pabpc1.2	7.43984125077885e-17	-0.452582052724755	0.906	0.979	1.15310099545821e-12	5	Pabpc1
Gpx8.3	8.3044185454431e-17	0.366144240462758	0.55	0.263	1.28710183035823e-12	5	Gpx8
Ncl.3	1.40915223897582e-16	-0.532418138379033	0.425	0.728	2.18404505518863e-12	5	Ncl
Cox6c.2	1.58605723297152e-16	-0.470452502201055	0.525	0.781	2.45823010538255e-12	5	Cox6c
C4b.4	1.65279486711469e-16	0.315501191298954	0.4	0.144	2.56166676454105e-12	5	C4b
Mest.3	1.71485714225243e-16	0.315876260101598	0.356	0.12	2.65785708477703e-12	5	Mest
Fbln5.1	1.95331122523267e-16	0.374403529056215	0.388	0.145	3.02743706798812e-12	5	Fbln5
Ly6a.3	2.19850813533295e-16	0.452522950662763	0.856	0.605	3.40746775895254e-12	5	Ly6a
Malat1.1	4.72909307551072e-16	0.383649343009924	0.994	0.977	7.32962135773407e-12	5	Malat1
Osr1	6.41400871056682e-16	0.288137754639082	0.281	0.087	9.94107210050752e-12	5	Osr1
Nov.4	1.51715079923174e-15	0.556495954529644	0.319	0.109	2.35143202372928e-11	5	Nov
Bicc1.3	1.93332857154718e-15	0.28816504758795	0.637	0.308	2.99646595304097e-11	5	Bicc1
Pi16.4	2.04503314900434e-15	0.302668203567779	0.469	0.195	3.16959687764183e-11	5	Pi16
Ly6c1.4	2.06685700109325e-15	0.381809436405747	0.631	0.312	3.20342166599442e-11	5	Ly6c1
Camk2n1	2.88975523093324e-15	0.259731531092495	0.312	0.104	4.47883163242343e-11	5	Camk2n1
Klf9	3.88221824425889e-15	0.294965560306424	0.425	0.175	6.01705005677686e-11	5	Klf9
Cdh11	4.97855714939651e-15	0.314577225175925	0.306	0.105	7.71626572584965e-11	5	Cdh11
Fam46a.1	5.56227961841159e-15	0.381765134470173	0.4	0.165	8.62097718057612e-11	5	Fam46a
Col15a1.3	6.61952676763097e-15	0.312797496710623	0.556	0.257	1.02596045371512e-10	5	Col15a1
Serbp1.1	7.77247936007074e-15	-0.443654129842071	0.5	0.745	1.20465657601736e-10	5	Serbp1
Arpc2.2	1.12513158069903e-14	-0.443795175223656	0.338	0.632	1.74384143692543e-10	5	Arpc2
Fhl1	1.47060463830786e-14	0.255499506814353	0.306	0.104	2.27929012891335e-10	5	Fhl1
Pbx1	2.64462828381135e-14	0.254376092748941	0.369	0.142	4.09890937707921e-10	5	Pbx1
Pfn1.2	3.13540356331403e-14	-0.460641096187353	0.55	0.776	4.85956198278042e-10	5	Pfn1
Col16a1.2	4.28609744834444e-14	0.331826215929602	0.481	0.231	6.64302243518905e-10	5	Col16a1
Col6a3.3	4.68298503344637e-14	0.470548517090634	0.731	0.476	7.25815850333853e-10	5	Col6a3
Cyp26b1	4.73688403669659e-14	0.282595050622885	0.244	0.072	7.34169656847605e-10	5	Cyp26b1
Ecm2	7.38834680604675e-14	0.25452532261651	0.25	0.078	1.14511987146919e-09	5	Ecm2
Arpc1b	1.12704839737946e-13	-0.47644109695414	0.469	0.747	1.74681231109842e-09	5	Arpc1b
Fstl1.4	1.413852601821e-13	0.332464184320729	0.981	0.832	2.19133014756237e-09	5	Fstl1
Fcgrt	1.5228452944939e-13	0.271273179917732	0.425	0.188	2.3602579219361e-09	5	Fcgrt
Oat	1.66637727964319e-13	0.253901141833495	0.475	0.219	2.58271814571898e-09	5	Oat
Itm2b.3	2.19273265750756e-13	0.325862921839462	0.906	0.803	3.39851634587096e-09	5	Itm2b
[truncated: 2,651 more rows]
